# Supplementary material
Source: publisher figshare collection journal article supplement (https://aacr.figshare.com/ndownloader/files/39983604)
Supplement: Supplementary file 1 [file 39983604]

## Sheet: Sheet1
			#39364 WS8 EtOH				#39369 WS8 DMSO				#39365 WS8 E2				#39366 WS8 E4				#39371 WS8 T-352				#39370 WS8 T-135				#39368 WS8 BPTPE				#39367 WS8 Endoxifen				#39309 5C EtOH				#39314 5C DMSO				#39310 5C E2				#39311 5C E4
GeneID	GeneSymbol	iBAQ_Denominator	SRA	Peptides	PSMs	AUC	SRA	Peptides	PSMs	AUC	SRA	Peptides	PSMs	AUC	SRA	Peptides	PSMs	AUC	SRA	Peptides	PSMs	AUC	SRA	Peptides	PSMs	AUC	SRA	Peptides	PSMs	AUC	SRA	Peptides	PSMs	AUC	SRA	Peptides	PSMs	AUC	SRA	Peptides	PSMs	AUC	SRA	Peptides	PSMs	AUC	SRA	Peptides	PSMs
5591	PRKDC	258.5	S	246	1236	336.044	S	224	1130	210.293	S	241	1134	243.047	S	218	935	204.035	S	185	1312	64.404	S	233	1064	165.789	S	223	1128	198.768	S	212.99	1138	252	S	283	1281	284.162	S	311	1318	245.659	S	301	1311	304.499	S	293	1193
8295	TRRAP	252	S	118	165	5.08956	S	83	118	2.60715	S	106	149	3.98527	S	92	127	3.33544	S	33	51	0.486743	S	83	107	1.77095	S	89	119	2.73113	S	3.13508	133	98	S	101	148	4.84847	S	91	133	3.35409	S	106	171	6.57693	S	99	149
1523	CUX1	72.8571	S	111	380	63.4278	S	84	342	41.3611	S	102	323	41.9062	S	95	283	34.0884	S	67	305	15.8958	S	99	310	32.8818	S	93	325	38.5845	S	40.8115	301	97	S	113	321	46.8495	S	110	301	37.8946	S	108	308	48.8682	S	103	271
7155	TOP2B	102.333	S	104	340	49.1496	S	86	291	29.8016	S	94	269	26.0223	S	84	219	22.5498	S	61	320	10.1521	S	90	265	21.6219	S	84	279	24.6133	S	32.5878	278	88	S	137	542	106.514	S	134	508	81.4014	S	132	484	107.57	S	135	472
4926	NUMA1	145	S	100	151	5.87339	S	64	97	2.37352	S	96	140	4.82194	S	71	99	2.96647	S	30	47	0.434213	S	74	103	1.89626	S	75	103	2.63452	S	3.4141	108	75	S	74	109	3.17392	S	52	73	1.53006	S	109	178	7.96306	S	145	272
1108	CHD4	46.9048	S	87	193	15.6801	S	64	144	8.97829	S	89	188	10.7953	S	65	142	8.26499	S	45	107	1.96769	S	77	161	7.21606	S	70	146	7.96128	S	9.1293	153	68	S	91	298	24.4393	S	87	274	20.0337	S	96	299	28.7645	S	98	295
7153	TOP2A	92.3333	S	83	195	11.6674	S	60	145	7.33224	S	78	172	7.2526	S	70	134	6.7124	S	37	112	1.31614	S	68	156	5.92119	S	64	146	6.04621	S	7.7731	165	76	S	119	440	49.2877	S	123	426	41.2648	S	116	429	50.9951	S	110	392
142	PARP1	66	S	78	432	152.303	S	64	371	96.2076	S	75	389	91.1474	S	72	359	81.091	S	58	345	20.1807	S	75	375	79.7808	S	68	366	77.3593	S	95.2605	366	74	S	89	465	155.754	S	87	426	114.764	S	82	442	158.137	S	87	402
1107	CHD3	101.65	S	68	118	4.57997	S	49	83	2.80895	S	65	109	3.83834	S	53	93	3.41759	S	32	64	0.798243	S	59	95	2.40933	S	55	101	2.85825	S	3.53904	99	57	S	70	164	5.8534	S	65	143	4.59384	S	74	164	6.96231	S	63	156
9757	KMT2B	139.6	S	61	95	4.20196	S	44	74	3.03142	S	64	94	4.37601	S	56	80	2.66952	S	35	54	1.31131	S	56	89	2.83761	S	60	98	3.58152	S	4.09384	96	62	S	76	146	5.55736	S	66	130	4.75037	S	63	129	5.82581	S	61	95
4297	KMT2A	198.571	S	61	77	1.57121	S	36	41	0.742964	S	52	62	0.992413	S	42	49	0.667093	S	12	18	0.164317	S	38	46	0.58173	S	38	45	0.670594	S	0.820425	48	39	S	49	69	1.93846	S	41	59	1.33304	S	48	69	2.13963	S	39	55
6596	HLTF	32	S	58	181	20.1365	S	47	164	13.1929	S	56	167	13.3126	S	49	150	11.71	S	35	119	3.83934	S	55	174	10.853	S	51	156	10.5847	S	12.6803	156	54	S	88	430	102.574	S	83	405	85.4309	S	83	400	107.506	S	79	378
8467	SMARCA5	67	S	57	140	11.2946	S	50	132	6.5644	S	50	129	7.27212	S	46	124	6.59008	S	35	88	1.15501	S	51	133	5.63114	S	46	112	5.77456	S	7.59187	131	48	S	67	204	16.7571	S	77	206	13.2994	S	72	200	17.723	S	63	165
23152	CIC	115.357	S	56	86	3.45776	S	35	54	1.68613	S	46	74	2.55027	S	40	58	2.11269	S	11	20	0.19285	S	38	52	1.34714	S	36	56	1.70776	S	2.11616	61	42	S	63	119	8.30303	S	53	104	5.867	S	62	119	8.5172	S	51	96
3980	LIG3	68	S	55	163	19.5566	S	51	171	13.8414	S	51	159	14.0573	S	44	148	13.052	S	40	148	5.91802	S	55	167	12.6011	S	50	159	12.9502	S	15.0692	156	48	S	73	282	57.7545	S	70	292	45.5664	S	71	273	57.3924	S	73	254
4798	NFRKB	72.3636	S	55	121	11.6393	S	48	121	8.02589	S	57	123	8.60003	S	51	114	8.39523	S	25	54	0.83228	S	53	115	6.96175	S	48	111	6.73988	S	8.78544	125	54	S	53	112	8.90561	S	51	116	8.18628	S	52	110	10.0775	S	53	95
7150	TOP1	46	S	55	327	106.885	S	46	296	82.133	S	52	319	83.715	S	50	288	76.8905	S	47	314	33.2287	S	55	316	73.5446	S	54	314	76.7241	S	83.538	284	49	S	75	441	207.012	S	80	454	165.569	S	79	435	206.91	S	83	414
4288	MKI67	171.75	S	54	60	0.811833	S	29	32	0.371732	S	49	54	0.572718	S	36	38	0.414538	S	3	6	0.029612	S	35	38	0.267536	S	34	39	0.384719	S	0.399668	41	38	S	48	61	1.82568	S	46	60	1.4861	S	56	70	2.52027	S	45	51
23523	CABIN1	124.412	S	53	77	2.22133	S	40	59	1.18628	S	56	79	1.85862	S	45	61	1.40358	S	11	13	0.114928	S	41	54	0.9428	S	39	55	1.27742	S	1.41678	64	48	S	45	56	1.79765	S	45	56	1.37697	S	41	55	2.04565	S	38	48
2547	XRCC6	37.6667	S	51	282	63.3991	S	54	333	69.696	S	58	338	99.2941	S	51	250	50.3001	S	66	348	75.5238	S	63	308	81.2505	S	61	340	95.5294	S	80.9078	318	57	S	65	450	98.9605	S	69	475	81.3379	S	66	451	93.3921	S	65	403
57634	EP400	153	S	50	65	1.52739	S	38	46	0.703433	S	52	62	1.39754	S	45	54	1.10263	S	9	14	0.137246	S	35	38	0.478257	S	43	49	0.821153	S	1.00927	52	47	S	47	60	1.90003	S	37	43	0.990909	S	52	70	2.95075	S	54	75
58508	KMT2C	215.731	S	50	57	1.00444	S	30	37	0.552628	S	49	61	1.09281	S	35	44	0.67292	S	7	9	0.130987	S	34	40	0.578	S	33	36	0.518009	S	0.503571	29	27	S	31	40	0.835289	S	17	21	0.382754	S	34	38	1.04577	S	25	29
2956	MSH6	76.5714	S	49	112	10.1139	S	38	99	6.17631	S	43	91	6.09718	S	39	84	5.47983	S	29	69	1.0108	S	43	102	5.5166	S	39	88	5.23262	S	6.82089	95	39	S	62	170	16.0053	S	59	159	12.9731	S	61	150	16.031	S	56	143
54617	INO80	74	S	49	99	5.96371	S	37	78	3.87637	S	42	76	3.41952	S	35	74	3.20738	S	19	42	1.13192	S	45	86	3.24635	S	42	82	3.33426	S	4.09988	77	39	S	54	103	5.18939	S	52	98	4.07258	S	48	92	4.98693	S	42	72
11177	BAZ1A	79.6	S	48	90	6.1014	S	36	80	3.42761	S	43	71	3.43954	S	38	62	2.94198	S	23	57	0.820122	S	42	73	2.61109	S	35	69	2.68363	S	3.80904	74	40	S	58	126	10.0641	S	54	115	7.65186	S	57	113	10.1096	S	51	97
4436	MSH2	56.5	S	47	128	12.4309	S	39	96	6.68857	S	42	100	7.31932	S	37	92	6.70184	S	31	93	2.68251	S	46	120	7.01333	S	41	105	6.42334	S	8.00743	111	41	S	55	190	22.3647	S	57	182	15.6239	S	56	176	20.3128	S	54	153
54897	CASZ1	90.6667	S	47	102	6.90763	S	35	81	4.31107	S	43	96	5.1139	S	36	88	4.14165	S	20	35	0.982628	S	36	79	3.49576	S	35	83	4.09519	S	4.59935	87	37	S	38	88	5.45042	S	34	76	3.75672	S	35	79	5.81336	S	32	71
91748	ELMSAN1	60.5	S	45	140	10.9043	S	40	108	6.06857	S	40	117	7.17451	S	39	106	6.2601	S	22	76	1.79435	S	36	95	5.16688	S	38	97	5.39658	S	6.95965	107	39	S	50	142	10.8885	S	48	122	8.62594	S	52	146	12.3517	S	44	114
7343	UBTF	48	S	44	127	14.0828	S	33	98	7.62723	S	42	126	10.885	S	39	115	8.21323	S	22	57	1.87506	S	38	113	7.25158	S	32	113	7.65472	S	8.42244	111	37	S	65	262	83.7646	S	67	255	63.8346	S	73	270	83.9042	S	69	225
7520	XRCC5	45	S	42	275	63.1565	S	42	313	57.4626	S	49	293	79.9629	S	43	233	50.4766	S	48	321	43.2778	S	46	270	52.6834	S	52	278	86.9248	S	73.5053	264	48	S	55	303	93.5633	S	58	305	73.8332	S	53	287	92.7961	S	55	273
7227	TRPS1	77.75	S	42	86	7.79988	S	31	65	3.98253	S	39	79	4.6322	S	36	67	4.20914	S	17	22	0.273965	S	38	70	3.7209	S	34	66	3.17656	S	4.11739	69	36	S	40	81	6.87955	S	41	81	5.63492	S	38	78	7.15825	S	40	75
6239	RREB1	89.3333	S	42	74	5.72313	S	29	50	2.5329	S	40	74	4.24493	S	31	59	3.07594	S	12	32	0.846705	S	34	62	2.43861	S	30	60	2.86428	S	2.81432	58	33	S	42	70	5.17993	S	35	61	4.00108	S	35	66	5.33753	S	33	55
1642	DDB1	67	S	40	73	3.02443	S	34	62	1.96104	S	32	47	1.25723	S	30	51	1.4088	S	13	25	0.301799	S	35	64	1.36695	S	31	52	1.25356	S	1.7265	61	31	S	31	58	2.03372	S	27	54	1.46379	S	28	54	1.83581	S	28	53
3848	KRT1	39	S	40	191	22.3518	S	33	150	10.2061	S	56	473	163.845	S	35	133	8.70371	S	39	150	8.08389	S	31	122	6.70971	S	37	162	13.4101	S	11.3598	142	36	S	40	153	22.1534	S	37	120	11.8298	S	34	118	12.4181	S	35	115
4437	MSH3	71	S	40	71	3.1901	S	29	48	1.3502	S	33	51	1.40399	S	30	41	1.28289	S	15	40	0.452896	S	37	60	1.43963	S	31	53	1.39732	S	1.81521	57	36	S	39	61	2.42839	S	36	52	1.95074	S	34	57	2.78836	S	25	41
3849	KRT2	44	S	40	100	5.12612	S	26	65	1.64115	S	37	110	4.43716	S	23	52	1.27628	S	28	54	1.29374	S	27	56	1.32136	S	36	76	4.36375	S	1.39671	61	27	S	35	81	4.01079	S	28	62	1.84923	S	31	65	2.30197	S	31	65
463	ZFHX3	154.4	S	40	45	0.97544	S	22	24	0.568693	S	45	49	0.846895	S	34	37	0.645909	S	8	12	0.0453901	S	30	32	0.417542	S	29	29	0.466023	S	0.553041	33	31	S	61	83	2.365	S	51	61	1.49879	S	53	72	2.39228	S	40	56
9320	TRIP12	116.963	S	39	54	1.09162	S	30	37	0.489598	S	42	48	0.625452	S	26	36	0.417174	S	12	21	0.166855	S	27	33	0.353552	S	33	46	0.561104	S	0.584645	42	33	S	45	77	1.8068	S	36	59	1.35268	S	43	67	1.86177	S	38	60
57473	ZNF512B	57.125	S	36	87	6.89606	S	20	61	3.69095	S	30	72	4.21332	S	27	62	3.20303	S	17	46	1.29266	S	29	68	3.24286	S	28	56	2.67011	S	3.7463	66	29	S	38	112	10.9326	S	37	122	8.49234	S	34	112	11.7728	S	29	89
9656	MDC1	97.8889	S	36	54	1.91107	S	18	24	0.452176	S	32	37	0.842408	S	19	23	0.441678	S	4	7	0.0476048	S	13	16	0.262727	S	13	18	0.329587	S	0.506391	23	18	S	50	74	4.20264	S	36	49	2.30504	S	44	66	4.53648	S	45	64
10856	RUVBL2	28	S	35	104	18.2057	S	31	96	16.6447	S	35	105	21.2374	S	36	95	9.73235	S	32	100	17.3275	S	34	105	20.1754	S	36	107	18.9096	S	15.6137	98	33	S	44	149	27.2336	S	47	169	28.9785	S	46	152	31.1025	S	42	130
5981	RFC1	36.8	S	35	62	2.64186	S	23	44	1.26153	S	27	48	1.36545	S	20	40	0.866993	S	14	29	0.501027	S	28	55	1.36561	S	26	54	1.43006	S	1.57686	49	27	S	42	100	4.72333	S	39	95	3.98231	S	42	85	4.66907	S	37	68
6117	RPA1	39.5	S	34	135	17.9553	S	31	160	23.6269	S	36	164	33.905	S	35	128	17.5112	S	37	165	27.412	S	40	174	34.692	S	40	175	40.4546	S	28.6428	165	38	S	49	266	60.6616	S	52	263	61.8897	S	48	223	62.146	S	43	183
3054	HCFC1	91.7143	S	34	72	5.40874	S	29	57	3.15665	S	32	63	3.71228	S	30	62	3.63155	S	15	28	0.671922	S	30	67	2.79375	S	29	55	2.47623	S	3.96467	75	34	S	37	77	5.49879	S	34	59	3.95456	S	37	73	7.27108	S	40	84
55133	SRBD1	54	S	33	60	2.57655	S	25	50	1.34334	S	23	38	1.10134	S	27	48	1.24947	S	12	22	0.269306	S	26	42	1.13793	S	26	43	1.02697	S	1.6051	60	27	S	33	69	4.98147	S	31	70	3.73427	S	32	62	4.6812	S	29	54
6949	TCOF1	78.3158	S	33	65	3.14837	S	24	63	2.14724	S	33	63	2.42643	S	30	60	2.23167	S	14	25	0.612089	S	27	55	1.83925	S	32	57	1.93895	S	2.0153	56	24	S	48	178	21.3063	S	50	172	20.0006	S	51	169	22.3581	S	43	153
58525	WIZ	75.9	S	33	51	2.20891	S	24	42	1.24516	S	29	51	1.47118	S	28	45	1.32977	S	8	14	0.0600022	S	27	47	1.01628	S	27	46	1.12047	S	1.75583	51	28	S	50	120	8.5814	S	47	121	6.80873	S	45	119	9.58886	S	43	86
11198	SUPT16H	63.5	S	33	56	1.80549	S	22	38	0.975751	S	31	45	1.04957	S	27	39	0.957011	S	9	14	0.179132	S	25	41	0.864722	S	23	39	0.756727	S	1.21129	42	28	S	28	52	2.34584	S	27	53	2.02106	S	24	42	2.05698	S	21	35
5925	RB1	54	S	33	46	1.87615	S	22	35	1.18701	S	29	41	1.29173	S	26	38	1.23211	S	5	5	0.0210867	S	24	36	0.962404	S	25	34	0.938222	S	1.49716	39	27	S	40	72	4.75442	S	34	71	3.52404	S	39	73	5.23754	S	34	60
3856	KRT8	34.5	S	33	66	2.91504	S	21	52	2.2976	S	31	66	3.17912	S	26	51	2.08902	S	36	66	2.81092	S	34	62	3.21876	S	33	61	3.97606	S	3.71309	63	33	S	29	54	3.14373	S	34	71	3.39329	S	40	80	6.51688	S	45	115
2186	BPTF	171.2	S	33	39	0.709176	S	19	22	0.293345	S	30	36	0.532146	S	25	28	0.43771	S	5	6	0.045072	S	20	21	0.255564	S	19	23	0.347282	S	0.357267	20	18	S	31	34	0.991035	S	22	24	0.426274	S	31	35	1.10259	S	29	32
2068	ERCC2	42	S	32	69	3.29592	S	37	83	3.98648	S	35	82	5.07231	S	31	64	2.85653	S	34	63	3.22499	S	39	85	4.41491	S	39	87	4.44561	S	4.59491	83	39	S	37	89	4.45376	S	34	83	3.675	S	35	83	4.32254	S	27	65
3858	KRT10	31.5	S	32	101	11.109	S	24	68	4.12856	S	31	106	12.994	S	22	55	3.69315	S	23	58	2.60554	S	26	56	2.89426	S	28	83	8.42828	S	3.39964	62	23	S	29	79	8.2071	S	24	62	4.05229	S	21	50	3.95458	S	25	75
8607	RUVBL1	22	S	32	99	14.1504	S	24	90	13.798	S	29	109	18.1894	S	31	70	6.79202	S	27	101	13.7913	S	29	91	16.2067	S	33	105	16.0433	S	12.8069	96	30	S	30	133	22.2011	S	32	139	23.8889	S	30	122	24.5636	S	29	112
23028	KDM1A	47.5	S	32	79	6.44886	S	24	61	4.26629	S	21	56	3.76234	S	25	62	3.82869	S	16	48	1.22408	S	22	60	3.18563	S	22	57	3.49582	S	4.92467	63	24	S	30	91	8.83305	S	29	80	5.56197	S	28	81	8.97299	S	27	72
29855	UBN1	55.8	S	32	56	2.35001	S	22	35	1.24189	S	30	47	1.29275	S	24	35	1.22504	S	10	13	0.167842	S	28	41	1.01438	S	22	38	1.14336	S	1.39018	41	27	S	25	46	1.84247	S	26	42	1.41564	S	25	41	2.10199	S	24	37
23613	ZMYND8	72.7857	S	32	51	1.30057	S	20	31	0.675535	S	27	37	0.792775	S	26	33	0.715322	S	7	12	0.103515	S	26	39	0.619149	S	22	30	0.562126	S	0.835963	36	26	S	17	27	0.641813	S	15	23	0.405881	S	17	28	0.831948	S	17	26
79977	GRHL2	32.75	S	31	69	6.01054	S	31	86	6.71624	S	33	92	9.57839	S	33	81	5.3304	S	38	71	6.12829	S	37	83	7.91922	S	39	90	8.47889	S	7.27617	86	36	S	40	110	6.59711	S	38	131	6.88284	S	37	107	6.85233	S	36	87
9112	MTA1	52.4375	S	31	99	5.79311	S	30	98	4.91213	S	33	91	7.01684	S	29	87	4.85418	S	32	89	3.86342	S	32	115	5.22955	S	31	93	7.91671	S	6.97785	101	35	S	35	104	5.10916	S	31	104	3.8481	S	33	97	4.87145	S	35	104
9219	MTA2	45.5	S	31	91	9.22157	S	28	89	9.11841	S	31	98	12.9814	S	34	87	8.67168	S	34	86	9.59941	S	34	98	11.2155	S	33	104	12.9061	S	11.712	106	36	S	40	148	15.1316	S	39	159	12.103	S	40	150	17.0093	S	41	156
3192	HNRNPU	49	S	31	103	22.3336	S	25	87	12.886	S	30	91	13.2227	S	26	89	11.4815	S	20	75	5.79761	S	30	95	12.4099	S	28	87	11.2631	S	15.1512	98	28	S	28	87	12.0781	S	25	65	7.15951	S	29	85	13.8558	S	29	72
7508	XPC	44.4	S	31	91	12.5946	S	25	79	8.48329	S	29	91	9.01278	S	23	73	6.66334	S	26	100	4.90965	S	29	87	7.99599	S	28	84	7.66694	S	10.0355	93	28	S	30	92	8.91884	S	31	93	7.81782	S	31	91	8.65614	S	26	73
84181	CHD6	138.4	S	31	35	0.511368	S	24	29	0.276461	S	35	38	0.40065	S	24	30	0.306552	S	4	4	0.00707503	S	18	20	0.144544	S	20	24	0.20744	S	0.346205	36	30	S	20	25	0.233554	S	20	24	0.145951	S	25	30	0.369597	S	26	32
221937	FOXK1	39	S	30	55	3.46949	S	24	46	1.85497	S	24	49	2.19907	S	26	52	2.05626	S	15	31	0.397741	S	26	49	1.83626	S	28	57	1.88519	S	1.95748	56	28	S	26	56	3.27282	S	24	49	2.33807	S	24	55	3.42087	S	23	51
31	ACACA	145.375	S	30	33	0.387104	S	16	20	0.139626	S	27	29	0.233166	S	18	18	0.147918	S	1	1	0.0134681	S	16	16	0.0996128	S	19	21	0.148931	S	0.199334	24	23	S	15	15	0.151014	S	10	10	0.0716305	S	10	10	0.144654	S	13	13
3312	HSPA8	33.5	S	29	97	7.13806	S	25	98	6.6283	S	32	102	10.8391	S	30	95	7.07792	S	32	86	7.51827	S	31	97	8.21077	S	32	106	10.5243	S	9.22344	99	31	S	33	121	14.9213	S	33	112	11.0306	S	33	123	18.7107	S	34	156
2071	ERCC3	47.6	S	29	60	3.08391	S	21	44	1.95725	S	25	43	1.52674	S	22	40	1.25099	S	17	35	0.795664	S	28	50	1.66731	S	27	49	2.10483	S	2.12512	50	26	S	27	65	3.3904	S	26	59	2.55131	S	26	49	3.24069	S	23	40
50485	SMARCAL1	48	S	28	56	2.75399	S	28	53	1.80741	S	28	52	1.84599	S	25	53	1.79934	S	18	42	0.521749	S	25	54	1.66381	S	27	57	1.56249	S	2.0715	53	26	S	37	107	8.64884	S	35	95	6.28726	S	39	99	8.38087	S	36	82
3857	KRT9	34	S	28	79	6.7968	S	20	60	3.30402	S	48	309	104.071	S	26	59	3.2934	S	24	58	2.51342	S	19	41	1.74644	S	25	62	2.98798	S	4.08016	60	25	S	29	82	7.37785	S	25	64	4.54868	S	23	63	4.76674	S	23	69
9569	GTF2IRD1	64.25	S	27	46	1.32384	S	25	43	1.10346	S	21	39	0.710994	S	18	32	0.512613	S	13	27	0.449303	S	23	35	0.678348	S	23	42	0.756523	S	0.870488	45	25	S	14	24	0.706524	S	17	30	0.567748	S	15	26	0.795636	S	11	16
3852	KRT5	37	S	27	55	0.924989	S	16	28	0.371664	S	42	106	9.94413	S	16	29	0.309526	S	15	29	0.225385	S	21	34	0.254837	S	22	38	0.525248	S	0.465288	35	21	S	25	40	0.885703	S	17	33	0.476304	S	15	29	0.476598	S	15	30
5430	POLR2A	117	S	27	31	0.367399	S	15	21	0.213556	S	20	21	0.242321	S	24	25	0.289149	S	2	2	0.0243171	S	19	19	0.155327	S	19	21	0.186107	S	0.232247	19	18	S	16	17	0.307351	S	15	15	0.219803	S	22	23	0.570268	S	19	19
54815	GATAD2A	45.5	S	26	75	3.9177	S	25	94	3.76504	S	28	82	5.38678	S	30	82	4.1828	S	27	65	4.19257	S	27	82	4.85353	S	29	85	5.9544	S	5.22367	82	29	S	33	142	11.5156	S	35	143	9.55341	S	32	136	12.008	S	33	130
8473	OGT	52	S	26	43	1.22475	S	24	32	0.764225	S	27	44	0.935656	S	25	37	0.803372	S	9	12	0.0940289	S	26	37	0.69384	S	24	35	0.672904	S	0.930519	38	24	S	32	51	1.43065	S	26	36	0.896865	S	29	47	1.57262	S	31	40
203068	TUBB	21.8	S	26	110	15.6482	S	22	123	16.1564	S	26	122	19.6067	S	23	93	8.82999	S	24	126	18.075	S	24	120	18.1905	S	27	121	17.7148	S	18.3455	129	27	S	28	175	42.4878	S	28	168	32.5464	S	32	247	79.5851	S	32	266
3181	HNRNPA2B1	20.5	S	26	94	8.45017	S	20	65	8.17535	S	24	77	9.68224	S	24	58	4.13173	S	32	96	9.59819	S	25	77	9.2903	S	26	73	8.69234	S	8.17564	80	22	S	32	142	23.8886	S	33	128	19.8476	S	31	126	24.3245	S	34	128
254048	UBN2	61	S	26	46	1.26765	S	18	28	0.696775	S	24	40	0.877899	S	23	37	0.782455	S	7	12	0.125007	S	21	38	0.705255	S	25	39	0.757557	S	0.899469	40	25	S	18	34	1.25341	S	18	33	1.0171	S	22	39	1.64005	S	21	34
2975	GTF3C1	124.667	S	26	31	0.50866	S	16	19	0.161144	S	25	28	0.484544	S	19	21	0.255803	S	7	9	0.0441265	S	20	22	0.189301	S	18	22	0.222943	S	0.36224	26	22	S	29	38	1.02856	S	26	34	0.545183	S	47	75	2.29564	S	60	115
57673	BEND3	51	S	25	64	1.85873	S	25	66	1.54616	S	27	68	1.55707	S	24	66	1.29688	S	20	37	0.669765	S	26	64	1.4182	S	26	63	1.47344	S	1.86813	65	27	S	30	97	5.38028	S	31	89	4.21581	S	28	89	5.60459	S	29	79
7290	HIRA	59	S	25	52	2.71674	S	21	47	1.8379	S	24	49	2.11979	S	20	41	1.80416	S	14	34	0.337184	S	26	49	1.52689	S	20	45	1.45256	S	2.33968	50	24	S	22	63	3.37668	S	22	52	2.21495	S	24	61	3.55005	S	23	51
10383	TUBB4B	25	S	25	98	2.71839	S	20	98	2.29326	S	26	99	2.79432	S	22	88	1.92862	S	22	101	2.20208	S	24	104	2.80742	S	26	100	3.18606	S	3.10027	114	26	S	27	150	3.0369	S	26	132	1.89852	S	32	200	4.92472	S	32	209
55252	ASXL2	82.3333	S	25	30	0.752868	S	16	17	0.376479	S	24	31	0.669771	S	22	28	0.614557	S	5	10	0.138489	S	18	25	0.35709	S	18	22	0.404705	S	0.575328	27	22	S	15	20	0.422358	S	12	16	0.228567	S	15	21	0.577053	S	12	18
4204	MECP2	22.25	S	25	51	4.82531	S	14	54	4.64883	S	30	70	8.02307	S	26	56	4.67907	S	21	45	5.83004	S	20	55	6.05059	S	26	62	8.22111	S	6.83351	60	27	S	22	71	5.20156	S	22	64	4.94041	S	21	62	5.33594	S	20	53
54880	BCOR	105.4	S	25	25	0.336404	S	10	11	0.127336	S	23	24	0.211859	S	19	21	0.20056	S	2	3	0.00524787	S	14	15	0.12935	S	15	16	0.134941	S	0.192961	18	17	S	18	21	0.444621	S	12	14	0.317694	S	13	14	0.435392	S	15	16
50809	HP1BP3	27	S	24	34	1.37974	S	24	43	1.22397	S	31	41	2.53512	S	27	36	1.74515	S	25	36	1.80661	S	25	39	1.82784	S	26	36	1.95309	S	1.70732	36	25	S	14	22	0.683167	S	13	21	0.604733	S	15	24	0.699876	S	8	11
7156	TOP3A	47.5	S	24	58	2.98884	S	23	59	2.35301	S	22	52	2.11794	S	23	49	1.91029	S	15	35	0.484063	S	23	54	1.82924	S	22	53	1.93034	S	2.56405	54	25	S	31	91	7.37795	S	35	83	5.64237	S	28	78	7.72454	S	29	72
9031	BAZ1B	96	S	24	27	0.494502	S	16	18	0.22713	S	22	22	0.259173	S	17	19	0.267017	S	1	2	0.0209151	S	16	17	0.179316	S	16	19	0.199892	S	0.320099	21	20	S	10	10	0.140936	S	6	6	0.100197	S	5	5	0.0890973	S	6	7
55689	YEATS2	80.2857	S	24	27	0.560426	S	16	18	0.336194	S	20	24	0.38378	S	20	25	0.372261	S	4	6	0.0430432	S	17	21	0.283271	S	16	22	0.339028	S	0.503757	27	21	S	18	23	0.509883	S	16	18	0.362364	S	20	23	0.754505	S	19	21
3861	KRT14	35	S	24	51	0.682066	S	14	23	0.133705	S	38	105	5.38597	S	16	30	0.136255	S	11	20	0.0470385	S	14	25	0.124698	S	20	33	0.231791	S	0.24957	30	16	S	20	41	0.5014	S	14	31	0.223446	S	14	25	0.18797	S	15	31
11284	PNKP	36	S	23	51	2.92347	S	20	60	4.08058	S	27	56	5.54763	S	23	47	3.26003	S	26	52	4.55058	S	26	63	5.49169	S	27	58	5.73118	S	4.28244	54	25	S	35	100	14.6488	S	35	109	18.3074	S	38	94	15.9108	S	33	97
3184	HNRNPD	16.5	S	23	88	21.3831	S	17	77	17.8553	S	24	86	22.5868	S	23	58	8.28408	S	20	76	20.0212	S	20	91	22.6738	S	22	74	18.9865	S	16.9092	73	21	S	25	70	19.7277	S	27	83	19.2621	S	25	73	19.0662	S	26	60
22882	ZHX2	51	S	23	28	0.670554	S	14	17	0.331043	S	20	26	0.476537	S	20	25	0.537141	S	4	6	0.021011	S	18	24	0.435083	S	15	19	0.389717	S	0.52157	22	17	S	29	51	3.08852	S	29	52	2.44628	S	34	57	3.52076	S	26	38
3835	KIF22	41.6667	S	22	34	1.00533	S	23	33	1.05096	S	24	36	1.37796	S	19	26	0.774108	S	25	38	0.84837	S	20	27	1.09171	S	24	37	1.37685	S	1.30865	37	24	S	33	78	3.96978	S	32	79	3.53368	S	30	63	3.12487	S	23	53
79913	ACTR5	31	S	22	46	3.15229	S	23	63	3.65087	S	22	59	5.00823	S	20	43	2.74714	S	21	52	4.08533	S	26	59	4.66914	S	23	55	5.65478	S	4.30931	56	23	S	24	91	5.99705	S	25	82	6.49339	S	27	79	6.54379	S	23	59
10919	EHMT2	67.1111	S	22	33	0.80916	S	18	24	0.462861	S	17	25	0.462676	S	17	23	0.434828	S	5	11	0.110448	S	18	24	0.437331	S	16	23	0.2913	S	0.422046	24	16	S	28	63	2.19889	S	23	44	1.58533	S	25	56	2.4248	S	21	46
9439	MED23	77.625	S	22	31	0.561759	S	18	24	0.330724	S	16	25	0.452593	S	17	23	0.493095	S	13	18	0.115155	S	20	26	0.309045	S	19	26	0.320811	S	0.443	25	18	S	19	26	0.603944	S	15	21	0.417219	S	22	34	1.11156	S	18	28
3875	KRT18	31	S	22	39	2.01017	S	16	35	1.18065	S	22	39	1.98137	S	15	20	0.83927	S	25	43	2.42111	S	21	39	2.16785	S	20	36	1.60775	S	1.68775	38	22	S	21	38	2.34657	S	29	55	2.7084	S	30	58	5.35184	S	36	84
5985	RFC5	25	S	22	33	1.73881	S	15	30	1.52966	S	18	35	1.99792	S	17	26	0.709028	S	24	44	1.99519	S	19	28	1.52103	S	21	33	1.72623	S	1.62565	30	18	S	23	60	4.28718	S	21	54	2.59356	S	21	57	4.33141	S	22	52
6874	TAF4	54	S	22	34	1.15682	S	14	17	0.585169	S	17	22	0.638268	S	14	19	0.456212	S	6	8	0.0572975	S	16	20	0.517105	S	13	19	0.477505	S	0.721844	20	14	S	16	24	1.11161	S	14	17	0.77703	S	17	23	1.18858	S	13	20
9658	ZNF516	74.6667	S	22	27	0.40624	S	12	14	0.199822	S	16	22	0.246508	S	17	22	0.270078	S	4	5	0.0240743	S	19	23	0.207607	S	15	19	0.232236	S	0.301175	21	16	S	8	11	0.0750734	S	10	12	0.080409	S	8	8	0.0650623	S	5	6
84678	KDM2B	54.5556	S	21	33	0.84544	S	21	34	0.79067	S	21	33	0.658708	S	20	28	0.555378	S	9	19	0.221995	S	19	31	0.589651	S	17	32	0.599904	S	0.742231	35	21	S	31	60	2.12143	S	30	53	1.45733	S	32	61	2.26825	S	19	32
57459	GATAD2B	38	S	21	58	3.42501	S	19	69	3.41695	S	27	75	6.33862	S	27	74	4.02435	S	28	62	4.46074	S	28	74	5.2571	S	29	75	6.00392	S	4.81541	76	31	S	27	82	6.14074	S	30	95	5.09757	S	27	89	7.16679	S	28	103
23450	SF3B3	68	S	21	34	0.628254	S	17	26	0.432565	S	17	30	0.525181	S	19	32	0.472135	S	8	11	0.0863116	S	14	25	0.318054	S	20	31	0.429937	S	0.509702	31	20	S	26	45	1.44481	S	20	31	0.838922	S	24	37	1.32619	S	26	41
5253	PHF2	56	S	21	26	0.690996	S	15	19	0.430383	S	16	19	0.373734	S	13	18	0.365799	S	3	3	0.0451144	S	15	17	0.321462	S	12	14	0.389521	S	0.369842	21	17	S	9	12	0.280845	S	7	10	0.194779	S	9	9	0.208134	S	3	3
9862	MED24	63	S	21	26	0.58956	S	13	17	0.306557	S	17	21	0.314099	S	15	16	0.268991	S	4	8	0.061072	S	15	18	0.172377	S	14	19	0.285096	S	0.188145	17	12	S	20	26	0.63605	S	17	21	0.431118	S	21	36	1.22389	S	21	31
1832	DSP	175	S	21	25	0.181761	S	10	10	0.0583523	S	84	128	3.61677	S	20	21	0.162255	S	2	2	0.00332646	S	10	10	0.0400973	S	12	12	0.0622453	S	0.183099	21	21	S	17	21	0.178358	S	9	9	0.1089	S	45	54	0.902026	S	93	140
1997	ELF1	24.6667	S	21	63	5.94337	S	10	36	3.55043	S	17	57	4.27486	S	16	52	3.6053	S	11	24	1.18979	S	17	53	3.58148	S	17	50	4.15985	S	4.45194	47	16	S	19	65	6.48676	S	18	58	5.61969	S	17	55	6.29254	S	15	49
51377	UCHL5	15.5	S	20	48	2.75151	S	21	45	2.25114	S	19	46	2.61993	S	16	31	1.32046	S	21	46	2.92033	S	21	45	2.35093	S	20	46	2.69702	S	2.27875	44	20	S	21	48	3.78184	S	18	39	2.47077	S	20	50	3.47733	S	19	36
7182	NR2C2	33.6	S	20	26	1.33865	S	17	32	1.39596	S	20	27	1.94879	S	19	26	1.32235	S	17	23	1.57569	S	18	27	1.79212	S	22	29	2.04563	S	1.96963	30	19	S	17	26	1.35111	S	18	26	1.50437	S	13	19	1.09336	S	16	20
220988	HNRNPA3	20.3333	S	20	48	3.72948	S	16	38	2.66676	S	20	41	4.36641	S	14	25	1.01365	S	24	56	5.65191	S	18	40	3.44321	S	19	37	3.20291	S	2.50971	35	17	S	19	51	5.49095	S	21	56	5.52938	S	18	42	5.2186	S	16	45
116092	DNTTIP1	25.5	S	20	37	2.20696	S	16	33	2.2475	S	19	43	3.1319	S	15	27	1.0496	S	21	43	2.32021	S	21	38	2.40274	S	18	35	2.6053	S	2.09608	37	19	S	20	45	3.71805	S	21	42	2.51773	S	19	41	3.753	S	21	43
7707	ZNF148	34.3333	S	20	35	0.857988	S	16	26	0.548535	S	16	25	0.50361	S	15	22	0.443279	S	8	18	0.198478	S	19	34	0.529049	S	15	26	0.487815	S	0.666163	30	16	S	17	25	0.884796	S	14	17	0.454521	S	18	24	1.04078	S	18	24
4670	HNRNPM	48.3889	S	20	33	1.23769	S	15	29	0.926314	S	21	42	1.50527	S	20	32	1.0765	S	22	35	1.00462	S	22	39	1.29434	S	20	42	1.78522	S	1.72715	43	21	S	27	69	2.21489	S	28	61	1.29542	S	31	90	3.53114	S	34	130
5813	PURA	16	S	20	52	5.29622	S	15	43	5.4015	S	18	53	7.25838	S	19	32	2.57861	S	21	61	7.41993	S	22	50	5.97447	S	22	52	6.2716	S	4.96036	43	23	S	23	65	18.0894	S	23	63	18.9577	S	21	74	17.8412	S	21	58
6878	TAF6	49	S	20	31	0.873752	S	15	24	0.588477	S	18	32	1.17526	S	21	31	0.780521	S	18	25	0.592292	S	16	27	0.608482	S	20	28	1.06353	S	1.02743	31	19	S	20	30	1.10228	S	18	25	0.718752	S	18	27	0.983253	S	15	25
8202	NCOA3	75.75	S	20	30	0.694746	S	13	16	0.290347	S	35	56	2.32408	S	27	51	2.00317	S	4	5	0.0727158	S	18	24	0.403085	S	12	13	0.143007	S	0.126991	9	8	S	9	12	0.15932	S	6	8	0.0931769	S	23	40	1.95004	S	24	40
10111	RAD50	97	S	20	23	0.323566	S	13	13	0.131098	S	18	18	0.214721	S	16	17	0.193874	S	3	4	0.0183523	S	13	16	0.131563	S	12	12	0.116693	S	0.246716	16	15	S	53	84	3.38799	S	45	72	2.48661	S	56	88	4.7485	S	54	96
79813	EHMT1	58.8696	S	20	28	0.646687	S	11	13	0.251972	S	19	26	0.440615	S	14	18	0.311489	S	3	4	0.0470861	S	13	17	0.261501	S	12	14	0.244928	S	0.225205	20	15	S	24	44	1.23324	S	21	36	0.931874	S	23	39	1.33762	S	23	35
83990	BRIP1	74.25	S	20	21	0.317857	S	10	11	0.125925	S	14	15	0.208264	S	19	20	0.254939	S	1	3	0.0354376	S	15	16	0.190325	S	14	15	0.181325	S	0.26788	15	14	S	33	44	1.36526	S	29	42	0.933356	S	36	53	2.06549	S	34	47
2965	GTF2H1	34	S	19	34	1.72102	S	24	50	2.27196	S	29	58	3.38815	S	23	44	1.40575	S	30	55	2.28286	S	33	58	2.69338	S	30	53	2.70637	S	2.6293	55	28	S	28	54	2.28032	S	31	61	3.17639	S	25	49	2.56475	S	25	49
93973	ACTR8	36.5	S	19	44	3.01429	S	17	43	2.92444	S	22	52	3.9458	S	22	45	2.6442	S	24	50	3.38565	S	24	57	3.7013	S	24	54	4.45034	S	3.76034	53	25	S	24	75	3.76741	S	21	73	3.27	S	22	68	3.7208	S	22	49
5814	PURB	18	S	19	58	5.91768	S	17	65	12.1534	S	22	73	17.0486	S	19	46	3.94679	S	21	88	19.2209	S	21	65	13.4707	S	21	66	13.7862	S	11.0685	61	21	S	21	54	9.28913	S	21	52	8.00268	S	20	54	9.93183	S	20	46
3182	HNRNPAB	15	S	19	61	8.83915	S	16	56	7.73849	S	19	58	9.72571	S	18	42	3.29056	S	19	60	8.89643	S	17	59	7.77825	S	19	60	8.04475	S	7.87445	62	18	S	25	88	20.482	S	25	90	18.3556	S	26	83	18.2254	S	22	67
5984	RFC4	26	S	19	31	1.65008	S	15	26	1.2947	S	16	29	2.00344	S	20	26	0.819202	S	20	34	1.70579	S	16	30	1.43864	S	19	35	1.50851	S	1.55094	31	19	S	21	49	5.3991	S	25	46	3.45967	S	24	50	4.92303	S	20	41
2099	ESR1	22.2	S	19	94	13.5817	S	14	71	13.3564	S	20	94	17.7076	S	20	98	11.962	S	20	77	11.8803	S	17	80	13.8198	S	19	82	17.7462	S	15.6453	96	21	S	23	108	21.8202	S	24	121	23.6707	S	26	113	23.4389	S	26	105
9782	MATR3	36.6667	S	19	28	0.795142	S	14	17	0.31519	S	12	17	0.355289	S	15	21	0.472598	S	7	9	0.0984639	S	9	15	0.218154	S	12	19	0.278359	S	0.390189	20	12	S	20	41	1.89623	S	12	18	0.276688	S	34	103	10.8003	S	27	94
3009	HIST1H1B	11	S	19	75	15.0962	S	13	70	13.757	S	16	66	17.6608	S	20	64	9.24315	S	18	78	26.1034	S	19	76	15.5908	S	20	68	13.6682	S	11.3575	59	18	S	19	67	18.2735	S	21	70	13.5515	S	17	56	15.4512	S	17	45
55127	HEATR1	134	S	19	21	0.162036	S	12	14	0.0824198	S	13	15	0.0931345	S	13	13	0.0876686	S	3	5	0.0214779	S	12	12	0.0578684	S	17	18	0.116946	S	0.113684	15	15	S	26	35	0.699288	S	26	36	0.582285	S	31	41	0.972291	S	25	35
65986	ZBTB10	40.6667	S	18	30	1.24863	S	17	33	0.892494	S	15	29	0.977117	S	14	27	0.811498	S	5	14	0.225829	S	16	28	0.745687	S	16	34	0.694875	S	1.12079	33	17	S	12	14	0.561948	S	10	12	0.306989	S	13	15	0.50392	S	7	7
6749	SSRP1	45	S	18	28	0.871258	S	16	24	0.784721	S	21	29	1.00853	S	19	28	0.698894	S	20	26	0.593924	S	22	31	0.8077	S	20	29	1.13319	S	0.964968	30	19	S	24	55	1.97983	S	27	58	2.22238	S	24	48	1.92206	S	15	36
3880	KRT19	33	S	18	30	0.444154	S	16	25	0.328935	S	21	42	0.429845	S	16	26	0.32276	S	15	25	0.394372	S	15	22	0.267101	S	16	25	0.312566	S	0.365506	28	14	S	17	25	0.442712	S	20	32	0.70123	S	18	28	0.786394	S	27	42
3006	HIST1H1C	12	S	18	77	14.4526	S	14	115	10.9754	S	16	71	16.6073	S	20	58	8.43304	S	18	80	27.8358	S	19	73	14.2345	S	19	72	10.4643	S	8.26168	64	17	S	20	70	19.8639	S	24	73	9.28466	S	18	59	17.1946	S	16	56
90378	SAMD1	28	S	18	57	10.2233	S	12	61	8.75059	S	20	68	13.0132	S	19	62	9.46674	S	18	48	9.20783	S	21	62	11.7559	S	20	68	13.872	S	13.2495	70	20	S	22	87	20.4951	S	20	73	14.4385	S	20	77	17.8331	S	19	77
6877	TAF5	42.5	S	18	26	0.596554	S	12	19	0.217234	S	16	22	0.332817	S	16	21	0.346491	S	5	6	0.0755698	S	14	21	0.240023	S	8	13	0.166897	S	0.304508	20	13	S	15	22	0.530217	S	10	18	0.345083	S	16	24	0.551739	S	13	19
5431	POLR2B	75.3333	S	18	24	0.312614	S	12	14	0.13976	S	13	15	0.152329	S	10	12	0.109627	S	2	2	0.0187054	S	11	13	0.0956351	S	9	12	0.0887766	S	0.155609	15	13	S	8	12	0.201698	S	6	9	0.112972	S	9	12	0.272935	S	11	12
56946	EMSY	77.75	S	18	21	0.356994	S	9	12	0.126393	S	13	14	0.145807	S	10	10	0.108846	S	2	2	0.0255565	S	10	10	0.117567	S	11	11	0.144726	S	0.219306	16	15	S	14	17	0.497794	S	14	17	0.381259	S	18	21	0.686096	S	17	19
23186	RCOR1	31	S	17	40	2.04801	S	20	42	2.47265	S	23	54	3.62957	S	21	51	1.9285	S	20	38	2.02712	S	21	41	2.5915	S	22	53	3.20566	S	2.83263	51	23	S	24	51	4.24717	S	24	52	4.62304	S	26	54	4.96386	S	26	48
5982	RFC2	19	S	17	30	1.29648	S	17	29	1.29235	S	18	31	1.51235	S	13	16	0.429145	S	19	29	1.29803	S	18	30	1.25952	S	17	25	1.23945	S	1.0967	27	18	S	23	49	3.70494	S	25	46	2.87155	S	23	50	3.67488	S	22	45
57504	MTA3	36.5714	S	17	49	2.67322	S	17	51	3.34777	S	17	52	3.7977	S	19	49	2.76525	S	21	58	3.34306	S	19	59	3.95284	S	20	56	4.48416	S	3.71927	52	18	S	31	139	16.9396	S	32	148	18.669	S	32	134	18.0046	S	29	123
5423	POLB	19	S	17	22	0.559126	S	13	19	0.482716	S	16	21	0.630786	S	10	12	0.237527	S	13	20	0.476783	S	12	16	0.442842	S	12	18	0.494184	S	0.349842	17	12	S	23	51	4.00433	S	23	49	2.65255	S	26	52	3.68191	S	18	31
86	ACTL6A	21.5	S	17	34	2.74471	S	13	29	2.19248	S	14	36	3.11258	S	11	22	1.18471	S	12	27	3.09966	S	13	27	2.7113	S	12	25	2.57095	S	2.29342	26	11	S	18	47	5.58522	S	20	47	5.6009	S	20	42	5.87688	S	18	43
3190	HNRNPK	28.5	S	17	39	2.35232	S	12	45	3.24792	S	18	44	3.47908	S	16	32	1.45733	S	18	42	2.96574	S	19	45	3.40776	S	17	43	3.3272	S	3.36767	41	18	S	23	57	4.18971	S	25	70	5.56001	S	25	64	5.7802	S	29	83
9678	PHF14	44.75	S	17	26	0.561146	S	12	15	0.264975	S	13	21	0.318395	S	12	17	0.279142	S	5	9	0.0986547	S	13	19	0.22928	S	11	17	0.24065	S	0.257505	15	11	S	11	17	0.41164	S	13	25	0.397696	S	11	16	0.478862	S	11	18
8458	TTF2	84.5714	S	17	22	0.268459	S	12	14	0.11133	S	12	14	0.130494	S	10	11	0.122266	S	3	4	0.025049	S	15	17	0.156138	S	11	15	0.125076	S	0.170233	15	13	S	47	111	6.3836	S	47	112	5.06974	S	48	107	7.03167	S	42	87
9282	MED14	82	S	17	27	0.47373	S	11	14	0.153146	S	18	25	0.407439	S	16	19	0.316694	S	5	7	0.0579924	S	19	23	0.298984	S	14	16	0.200502	S	0.255812	19	13	S	22	30	0.554009	S	20	28	0.459874	S	26	44	1.36784	S	22	35
9329	GTF3C4	38	S	17	18	0.275639	S	10	12	0.141771	S	11	14	0.121663	S	11	13	0.111866	S	2	2	0.0116662	S	14	16	0.168803	S	9	12	0.0902513	S	0.162327	16	13	S	16	16	0.479223	S	14	15	0.279225	S	16	19	0.781699	S	29	35
5887	RAD23B	15.6667	S	16	54	5.23668	S	16	83	8.44757	S	20	68	11.2251	S	17	53	6.07485	S	18	59	9.23087	S	17	65	9.06732	S	18	74	11.0333	S	8.638	69	18	S	16	32	2.41148	S	17	36	2.83234	S	18	33	2.80445	S	13	26
1998	ELF2	29.6923	S	16	34	1.91148	S	13	30	2.33812	S	17	43	3.24809	S	18	41	1.8582	S	15	39	2.20658	S	17	48	2.77818	S	17	43	3.22717	S	2.56644	39	17	S	17	48	2.30024	S	16	44	2.59908	S	17	44	2.15819	S	16	32
3065	HDAC1	22	S	16	61	5.92488	S	13	55	7.15269	S	15	72	10.6193	S	16	57	6.13083	S	20	72	7.87298	S	18	71	7.96242	S	17	69	10.1533	S	8.83848	71	16	S	20	96	13.1928	S	21	103	12.8965	S	21	93	13.7131	S	21	93
3178	HNRNPA1	20.5	S	16	38	2.15447	S	12	28	1.751	S	14	29	2.01093	S	13	23	0.658207	S	19	42	3.37943	S	15	28	1.99443	S	17	29	1.6963	S	1.54499	28	13	S	23	72	9.58679	S	22	66	7.69349	S	21	61	8.18995	S	20	58
23234	DNAJC9	18	S	16	20	1.06831	S	12	18	1.13108	S	13	17	1.71261	S	9	12	0.417469	S	15	22	1.96408	S	14	18	1.24213	S	13	18	1.34739	S	1.15001	21	15	S	10	14	0.739017	S	11	13	0.377061	S	11	13	0.544965	S	9	12
22992	KDM2A	62.6667	S	16	23	0.523184	S	12	15	0.226823	S	11	17	0.272288	S	12	18	0.274134	S	8	8	0.130098	S	12	17	0.253336	S	12	18	0.287063	S	0.333315	19	12	S	24	43	1.86058	S	27	49	1.71622	S	29	51	2.13507	S	19	33
7515	XRCC1	36	S	16	44	6.6781	S	11	47	6.09032	S	18	49	9.09101	S	16	41	6.55004	S	18	44	4.79053	S	20	49	7.00495	S	18	49	9.56057	S	8.80728	53	17	S	23	92	27.5475	S	25	85	23.4103	S	24	89	27.2936	S	20	83
8314	BAP1	37	S	16	23	0.531075	S	11	17	0.309322	S	14	17	0.307729	S	16	21	0.323335	S	5	6	0.0409019	S	13	18	0.218971	S	11	19	0.211944	S	0.30889	18	13	S	11	20	0.40319	S	9	15	0.29525	S	12	19	0.461197	S	12	19
641	BLM	65.6667	S	16	18	0.234091	S	7	8	0.103789	S	14	16	0.13424	S	14	15	0.113686	S	1	1	0.00953608	S	14	15	0.109107	S	15	16	0.168161	S	0.192891	15	14	S	17	19	0.580214	S	18	22	0.634332	S	17	23	0.83337	S	13	16
23126	POGZ	63.875	S	16	18	0.367926	S	7	7	0.121067	S	12	12	0.207415	S	11	13	0.223517	S	2	2	0.0119511	S	11	11	0.135028	S	5	5	0.116962	S	0.202769	9	8	S	18	23	0.738738	S	11	15	0.446008	S	18	22	0.813984	S	19	21
5469	MED1	70	S	15	21	0.320856	S	17	23	0.210377	S	19	28	0.579133	S	17	26	0.374341	S	1	3	0.025339	S	13	18	0.172395	S	11	15	0.180086	S	0.266936	24	18	S	14	22	0.325811	S	15	22	0.278065	S	20	31	0.880746	S	17	27
7112	TMPO	26.5	S	15	19	0.468536	S	15	18	0.429344	S	20	29	0.764685	S	19	27	0.626489	S	18	19	0.51257	S	15	20	0.42126	S	20	27	0.827913	S	1.06669	31	22	S	28	47	1.95124	S	23	33	0.937638	S	36	77	5.94562	S	39	97
8932	MBD2	19.5	S	15	37	2.98827	S	14	40	2.72789	S	17	41	3.63338	S	19	35	1.52751	S	16	36	3.73262	S	14	40	3.24495	S	13	33	3.0943	S	2.60652	35	14	S	16	40	5.31273	S	20	52	5.6748	S	16	44	5.34366	S	16	39
1022	CDK7	18.1667	S	15	31	1.88574	S	13	47	1.80996	S	15	30	2.14448	S	14	20	0.743572	S	16	29	1.89798	S	14	28	1.69941	S	13	27	1.70548	S	1.8044	30	13	S	15	29	2.19965	S	13	27	1.34846	S	15	30	2.21801	S	13	24
7020	TFAP2A	23.8333	S	15	33	1.84009	S	12	31	2.20688	S	18	34	2.46251	S	16	27	1.33989	S	16	29	1.68732	S	15	34	2.25816	S	18	38	2.70332	S	1.61617	33	15	S	19	46	6.21056	S	20	52	6.81119	S	23	48	6.44919	S	18	43
3607	FOXK2	29	S	15	26	0.933765	S	12	24	0.831805	S	15	32	1.41274	S	18	34	1.10986	S	14	20	0.753419	S	15	31	0.979406	S	21	34	1.36833	S	1.20623	37	20	S	18	35	1.95404	S	18	29	1.18127	S	13	24	1.39209	S	14	24
29915	HCFC2	45.6667	S	15	24	0.492439	S	12	24	0.375836	S	11	19	0.310274	S	14	22	0.295776	S	6	11	0.073455	S	13	25	0.320872	S	15	28	0.499866	S	0.444202	27	14	S	18	37	1.55494	S	15	30	1.08189	S	18	37	1.74487	S	19	29
57805	CCAR2	57	S	15	20	0.405255	S	11	14	0.221972	S	16	17	0.234667	S	15	20	0.327308	S	4	5	0.0614826	S	16	22	0.298946	S	13	20	0.246636	S	0.472958	23	15	S	7	11	0.185059	S	5	6	0.0892013	S	12	20	0.71837	S	23	39
7022	TFAP2C	25	S	15	38	4.04631	S	11	34	3.78173	S	14	34	4.46005	S	15	28	1.90101	S	18	44	4.95007	S	14	41	4.81463	S	15	41	3.37492	S	2.92526	36	15	S	15	37	3.88107	S	19	45	4.14149	S	20	41	3.82955	S	20	36
6118	RPA2	13	S	15	36	3.76216	S	10	38	5.3385	S	12	45	6.86431	S	11	18	1.16217	S	13	66	9.21879	S	14	45	5.74992	S	13	41	6.37622	S	3.99154	37	11	S	16	99	18.3546	S	16	84	12.3019	S	15	96	13.4279	S	14	93
7709	ZBTB17	51.5	S	15	18	0.54134	S	8	12	0.38102	S	16	18	0.509117	S	16	21	0.411063	S	5	6	0.079614	S	17	24	0.41818	S	15	22	0.381745	S	0.57043	23	17	S	7	10	0.270406	S	9	11	0.168066	S	8	11	0.276001	S	6	8
3309	HSPA5	40	S	14	22	0.413384	S	15	24	0.39873	S	19	33	0.745825	S	20	26	0.450061	S	15	19	0.34673	S	18	24	0.464928	S	20	30	0.695726	S	0.608028	28	20	S	16	33	0.709326	S	13	23	0.427334	S	17	24	0.742382	S	21	34
4221	MEN1	37.4	S	14	21	1.26446	S	14	27	1.17262	S	17	26	1.91699	S	14	19	1.02132	S	15	25	1.24071	S	14	19	1.3496	S	16	24	1.80703	S	1.59928	27	16	S	19	40	2.80526	S	17	36	1.97858	S	18	37	2.66299	S	13	32
1871	E2F3	13.5714	S	14	18	0.489436	S	13	17	0.459019	S	15	21	0.544798	S	13	15	0.257303	S	15	22	0.54391	S	15	21	0.545991	S	18	25	0.632972	S	0.499003	19	14	S	21	37	1.90859	S	21	34	1.99795	S	20	34	1.8664	S	21	30
5928	RBBP4	21.3333	S	14	55	11.4108	S	13	43	9.02214	S	13	48	10.8822	S	14	47	5.71442	S	17	50	12.3046	S	15	50	10.3364	S	15	47	9.21278	S	7.93916	40	11	S	18	63	17.7027	S	17	63	16.8934	S	16	49	17.1989	S	16	59
1643	DDB2	20.5	S	14	22	0.668293	S	13	17	0.542571	S	13	15	0.463264	S	11	13	0.234574	S	14	19	0.495079	S	12	18	0.509348	S	13	16	0.437102	S	0.405329	17	12	S	15	19	0.641259	S	13	18	0.799285	S	11	15	0.57478	S	9	13
9070	ASH2L	36.625	S	14	26	0.784539	S	12	26	0.848283	S	17	31	1.55496	S	14	25	0.81768	S	17	26	1.02444	S	16	29	1.1327	S	19	34	1.70682	S	1.42277	32	18	S	16	40	2.11541	S	13	32	1.30511	S	15	42	2.45123	S	15	37
2968	GTF2H4	26	S	14	32	1.55715	S	12	32	1.83189	S	16	32	1.8828	S	9	15	0.456158	S	15	34	2.02569	S	16	44	2.77416	S	17	32	1.47824	S	1.39871	33	15	S	17	36	2.11694	S	23	52	3.21577	S	20	40	2.72084	S	16	32
6909	TBX2	41	S	14	20	0.530234	S	12	26	0.380562	S	13	19	0.603119	S	16	20	0.562781	S	6	6	0.315461	S	14	23	0.533528	S	18	24	0.796603	S	0.621711	19	14	S	10	15	0.560742	S	8	14	0.452436	S	9	14	0.59987	S	8	11
149076	ZNF362	26.5	S	14	28	2.13473	S	12	31	2.11632	S	12	31	2.77486	S	15	24	1.13226	S	11	24	1.85148	S	14	27	2.46767	S	14	30	2.67041	S	2.08871	27	15	S	12	22	1.38523	S	11	20	1.42552	S	12	22	1.55677	S	8	15
4773	NFATC2	48	S	14	20	0.379409	S	10	12	0.212112	S	16	21	0.326198	S	14	18	0.291396	S	1	1	0.00693115	S	13	16	0.200747	S	11	16	0.200112	S	0.279328	20	16	S	6	6	0.0773388	S	6	6	0.0528987	S	7	7	0.0912271	S	5	5
27316	RBMX	22	S	14	18	0.49407	S	6	8	0.314053	S	13	17	0.539561	S	10	13	0.199946	S	13	15	0.609781	S	14	17	0.531543	S	15	19	0.475388	S	0.398854	19	17	S	21	33	1.0547	S	23	34	1.1303	S	22	33	1.0662	S	19	30
7003	TEAD1	21	S	14	21	0.417733	S	6	9	0.272512	S	12	16	0.305529	S	10	15	0.163746	S	10	14	0.374884	S	13	19	0.507716	S	13	18	0.323504	S	0.312603	15	11	S	15	28	0.724503	S	16	30	0.792465	S	17	29	0.783389	S	12	20
84256	FLYWCH1	43.75	S	13	22	0.439776	S	15	23	0.436509	S	12	21	0.346098	S	10	15	0.193912	S	11	15	0.135546	S	11	17	0.226595	S	13	21	0.404343	S	0.338995	20	11	S	17	33	1.36402	S	15	27	0.977569	S	15	31	1.1846	S	12	22
80010	RMI1	35	S	13	29	1.22506	S	12	26	1.52254	S	16	30	1.93075	S	12	22	0.849027	S	15	26	1.24808	S	16	27	1.58696	S	14	27	1.66904	S	1.70958	29	14	S	17	49	3.7335	S	18	49	2.84949	S	15	43	3.37739	S	13	32
5931	RBBP7	23	S	13	56	5.34533	S	12	48	3.54556	S	13	54	6.13568	S	13	46	2.97472	S	13	38	4.38249	S	13	46	4.74	S	14	45	4.45065	S	4.39592	45	13	S	13	64	8.64613	S	13	68	9.91758	S	13	54	10.593	S	13	57
1069	CETN2	10	S	13	33	3.05078	S	12	35	3.30377	S	12	49	4.76642	S	9	29	1.47205	S	16	58	5.21105	S	15	43	3.85262	S	12	36	3.94923	S	2.87401	35	10	S	11	38	1.84661	S	11	29	0.940742	S	11	27	1.08895	S	10	23
3066	HDAC2	26	S	13	46	3.12023	S	12	43	3.49535	S	12	58	5.5939	S	13	46	2.45342	S	15	59	4.00924	S	15	54	4.23141	S	14	56	4.75301	S	4.57721	60	14	S	18	93	14.3131	S	21	103	14.8035	S	18	95	15.718	S	18	89
64324	NSD1	124.625	S	13	13	0.205024	S	11	12	0.108319	S	19	21	0.219846	S	14	14	0.116327	S	1	1	0.00776107	S	9	11	0.0823708	S	13	16	0.128189	S	0.149156	16	13	S	12	15	0.18485	S	12	16	0.142343	S	10	13	0.173581	S	8	9
54980	C2orf42	36	S	13	14	0.261123	S	11	14	0.351895	S	13	17	0.435943	S	12	12	0.258768	S	12	17	0.287402	S	13	17	0.41377	S	15	19	0.538601	S	0.456016	18	14	S	4	6	0.0657871	S	5	7	0.101436	S	4	4	0.0652092	S	3	4
4331	MNAT1	15.6	S	13	17	0.780685	S	10	18	0.8292	S	13	21	1.03134	S	8	12	0.379494	S	14	21	1.02558	S	12	18	0.808673	S	11	19	0.785899	S	0.773515	18	10	S	12	22	1.34174	S	13	20	1.02275	S	12	20	1.24393	S	9	16
902	CCNH	19.8571	S	13	25	0.743178	S	9	20	0.638302	S	12	19	0.675153	S	12	19	0.345466	S	13	21	0.600595	S	11	20	0.545121	S	11	18	0.495127	S	0.486519	20	11	S	11	21	1.11887	S	11	17	0.660592	S	10	14	0.838081	S	9	13
53615	MBD3	17.5	S	13	20	0.662018	S	9	20	0.725584	S	12	19	0.91873	S	9	11	0.302019	S	13	23	0.82915	S	11	21	0.804276	S	11	20	0.752792	S	0.628109	15	10	S	13	29	1.96832	S	15	28	1.24386	S	16	38	1.8666	S	14	36
54891	INO80D	44	S	13	18	0.582632	S	9	15	0.372651	S	8	11	0.244651	S	9	12	0.244747	S	6	8	0.209162	S	8	13	0.250396	S	9	16	0.27166	S	0.375504	15	10	S	9	16	0.719008	S	10	17	0.544094	S	9	16	0.727194	S	9	12
10949	HNRNPA0	16	S	13	23	1.42499	S	8	16	1.44062	S	12	21	1.8476	S	9	14	0.567003	S	14	28	1.96206	S	10	24	1.82292	S	11	20	1.55842	S	1.54396	23	11	S	12	30	3.1831	S	11	20	1.94657	S	11	28	2.7727	S	11	22
2063	NR2F6	23	S	13	26	1.00218	S	8	22	0.781668	S	12	27	1.02366	S	10	17	0.365545	S	11	25	1.01544	S	9	24	0.931193	S	9	22	0.688325	S	0.800664	23	11	S	10	17	0.485638	S	10	15	0.503489	S	10	16	0.50188	S	9	13
11016	ATF7	18.5	S	12	22	0.99405	S	13	27	1.53263	S	17	35	2.01612	S	13	27	1.20246	S	15	27	1.4957	S	18	32	1.76221	S	19	36	2.22929	S	1.80326	30	16	S	18	38	2.82678	S	18	39	3.13526	S	16	34	2.14683	S	13	26
5929	RBBP5	29.75	S	12	23	1.37257	S	11	24	1.44129	S	14	23	2.42315	S	13	23	1.23687	S	15	22	2.16528	S	16	30	2.11237	S	16	30	2.47669	S	2.08403	28	16	S	17	45	3.12995	S	18	46	3.23379	S	20	48	3.77504	S	19	35
56980	PRDM10	42.625	S	12	21	0.977413	S	11	16	0.486517	S	13	22	0.600012	S	14	19	0.481675	S	3	9	0.024412	S	14	22	0.52096	S	11	19	0.459725	S	0.639297	21	13	S	11	13	0.342193	S	9	9	0.174371	S	7	8	0.26071	S	9	10
3726	JUNB	15	S	12	37	2.30526	S	11	33	2.05474	S	12	32	2.3593	S	10	20	1.12453	S	12	25	2.50934	S	9	26	2.16464	S	11	31	2.7378	S	1.9993	26	10	S	13	35	3.11792	S	12	30	3.00267	S	12	31	2.71589	S	9	17
129831	RBM45	37.3333	S	12	16	0.510532	S	11	23	0.571972	S	11	17	0.595918	S	10	13	0.253428	S	10	13	0.457953	S	14	23	0.672479	S	15	24	0.77063	S	0.489492	15	10	S	18	35	2.31383	S	19	37	2.54884	S	19	35	2.0741	S	20	31
125476	INO80C	11	S	12	22	1.67498	S	10	22	2.02614	S	12	26	2.64787	S	8	17	1.12672	S	14	27	2.49338	S	12	27	2.38212	S	12	24	2.46969	S	2.12344	22	10	S	13	33	3.79492	S	11	27	2.70756	S	14	34	3.33291	S	11	25
3315	HSPB1	14	S	12	20	1.54353	S	10	21	1.41309	S	12	30	2.24522	S	10	16	0.943438	S	13	24	1.97503	S	12	20	1.55237	S	12	21	1.74518	S	1.61745	21	12	S	12	24	2.65921	S	10	18	1.42919	S	12	19	2.63022	S	15	31
54840	APTX	18.7857	S	12	16	0.700904	S	10	15	0.550738	S	8	10	0.560597	S	10	13	0.27188	S	13	22	0.667781	S	13	19	0.54461	S	11	18	0.543463	S	0.455618	14	10	S	19	50	4.52017	S	17	48	4.33355	S	17	41	4.20748	S	15	43
6256	RXRA	26.3333	S	12	15	0.250511	S	9	11	0.202848	S	12	14	0.333496	S	10	13	0.211357	S	11	11	0.25328	S	12	14	0.334908	S	12	13	0.313961	S	0.495525	18	14	S	6	9	0.140128	S	8	10	0.135367	S	12	18	0.745295	S	13	22
284252	KCTD1	27.3333	S	12	17	0.209456	S	9	14	0.161899	S	12	16	0.162501	S	7	11	0.100326	S	5	6	0.0294368	S	9	12	0.128089	S	10	13	0.150064	S	0.176453	13	10	S	14	17	0.334189	S	13	19	0.366279	S	12	18	0.354926	S	8	11
11244	ZHX1	44	S	12	14	0.285602	S	9	12	0.109737	S	11	13	0.159471	S	8	11	0.0987104	S	3	7	0.029319	S	8	8	0.100969	S	7	7	0.117046	S	0.18722	16	14	S	18	25	1.5115	S	18	27	1.22386	S	18	24	1.55401	S	16	18
213	ALB	42	S	12	25	2.22457	S	8	17	1.92915	S	14	26	2.72285	S	9	19	1.40427	S	6	10	1.86023	S	7	15	2.29444	S	9	16	2.0198	S	1.83389	14	7	S	5	11	2.30481	S	5	12	1.91614	S	5	10	1.73026	S	4	10
1487	CTBP1	24	S	12	17	0.761306	S	8	28	0.499573	S	12	17	0.707225	S	9	11	0.296912	S	11	15	0.607952	S	11	22	0.760745	S	11	15	0.532952	S	0.485135	13	10	S	11	12	0.827097	S	14	18	0.929151	S	12	17	0.912896	S	12	15
51616	TAF9B	20	S	12	15	0.333017	S	7	8	0.229226	S	10	14	0.258256	S	9	11	0.159903	S	9	11	0.215191	S	9	11	0.28112	S	9	10	0.208373	S	0.209893	12	9	S	14	22	0.607443	S	11	17	0.271766	S	13	21	0.627137	S	13	18
7073	TIAL1	17.6667	S	12	19	0.467933	S	7	10	0.359984	S	9	12	0.497559	S	6	10	0.175725	S	12	15	0.516294	S	9	13	0.398623	S	11	15	0.502573	S	0.433878	14	10	S	10	22	0.85353	S	10	24	1.18623	S	11	24	1.16723	S	10	18
11168	PSIP1	22	S	11	18	0.606641	S	11	23	0.716795	S	18	28	1.13858	S	14	17	0.498752	S	13	20	0.706942	S	15	24	0.86421	S	16	27	1.09243	S	1.00461	29	17	S	18	54	2.29214	S	18	48	1.56268	S	17	39	2.11522	S	18	42
3727	JUND	13	S	11	23	2.03785	S	11	32	2.11131	S	12	33	2.77543	S	10	16	0.707998	S	10	27	2.84801	S	11	25	2.04327	S	13	28	2.61495	S	1.74292	23	10	S	13	35	2.25355	S	14	32	1.93946	S	11	30	1.89937	S	8	12
51222	ZNF219	42.75	S	11	11	0.142029	S	10	10	0.106873	S	11	11	0.101192	S	9	9	0.0860302	S	2	3	0.0134433	S	7	8	0.0616143	S	8	9	0.0904251	S	0.115354	8	8	S	10	12	0.287507	S	11	14	0.240734	S	10	11	0.317356	S	8	8
80789	INTS5	47	S	11	14	0.153954	S	10	13	0.0979609	S	9	11	0.10169	S	7	8	0.0759003	S	3	5	0.0163045	S	8	8	0.0567108	S	9	12	0.0663972	S	0.113459	11	9	S	12	26	0.544633	S	12	21	0.343027	S	13	23	0.732833	S	17	31
10521	DDX17	44	S	11	19	0.428373	S	9	11	0.306408	S	17	20	0.614323	S	17	23	0.537695	S	14	15	0.379679	S	17	23	0.450903	S	17	21	0.639689	S	0.608337	22	19	S	19	28	0.740873	S	19	27	0.451891	S	23	38	1.14562	S	22	52
221656	KDM1B	43.7273	S	11	19	0.489386	S	9	21	0.322314	S	12	21	0.427053	S	10	17	0.31459	S	4	9	0.122429	S	8	17	0.307993	S	10	19	0.409568	S	0.427298	17	9	S	14	24	0.608208	S	13	21	0.421725	S	13	21	0.693304	S	10	17
54971	BANP	19.6667	S	11	29	1.94835	S	9	29	2.04668	S	10	27	2.67233	S	9	21	1.4683	S	13	30	2.02293	S	14	29	2.18809	S	12	34	2.70676	S	2.47812	34	12	S	12	45	3.41857	S	14	42	3.94263	S	13	38	3.78013	S	13	32
1488	CTBP2	36.5	S	11	12	0.43223	S	9	11	0.425359	S	10	11	0.332009	S	10	11	0.230506	S	9	9	0.363336	S	10	13	0.534498	S	11	12	0.329383	S	0.386427	12	11	S	10	11	0.489299	S	12	13	0.542842	S	9	10	0.499778	S	12	13
5989	RFX1	46.75	S	11	13	0.276218	S	8	8	0.110418	S	11	13	0.180885	S	11	14	0.20916	S	3	3	0.0207844	S	10	13	0.121356	S	10	13	0.124988	S	0.243376	16	13	S	5	6	0.0825756	S	6	6	0.0551595	S	11	11	0.264791	S	15	21
11187	PKP3	54	S	11	13	0.0962363	S	8	11	0.0732677	S	9	12	0.118318	S	10	14	0.102367	S	1	1	0.00175146	S	9	10	0.0707196	S	12	13	0.161456	S	0.168555	17	12	S	18	25	0.524021	S	16	24	0.351435	S	21	37	0.936889	S	24	47
23598	PATZ1	37	S	11	19	0.485375	S	7	24	0.642927	S	10	21	1.65621	S	12	21	0.814319	S	10	16	0.50449	S	11	23	0.647861	S	11	21	1.3296	S	0.696942	23	11	S	11	26	0.579607	S	13	30	0.535037	S	12	25	0.586641	S	11	19
1059	CENPB	27	S	11	19	0.433263	S	7	14	0.330335	S	10	15	0.510721	S	11	19	0.442594	S	10	11	0.333565	S	8	12	0.358198	S	12	16	0.551628	S	0.423499	16	11	S	5	6	0.141675	S	6	8	0.163682	S	6	7	0.15298	S	3	4
8690	JRKL	28	S	10	19	0.545176	S	12	21	0.694442	S	15	23	0.988218	S	10	15	0.57196	S	12	17	0.491635	S	12	20	0.75767	S	14	26	0.92586	S	0.820458	21	13	S	9	12	0.411334	S	11	15	0.550292	S	10	12	0.516139	S	8	8
1386	ATF2	21	S	10	26	1.1906	S	11	23	1.43887	S	17	39	2.22804	S	13	31	1.0767	S	14	30	1.50155	S	14	33	1.7157	S	16	36	2.27973	S	1.74039	31	12	S	11	23	0.833506	S	11	22	1.08042	S	10	22	0.774686	S	8	13
9440	MED17	36	S	10	12	0.319183	S	11	12	0.2748	S	14	18	0.769612	S	11	11	0.3686	S	12	13	0.372229	S	12	14	0.461061	S	13	14	0.459563	S	0.328751	12	10	S	10	15	0.578698	S	9	13	0.374052	S	14	21	1.08613	S	15	23
10445	MCRS1	26.75	S	10	13	0.366052	S	11	16	0.487927	S	12	14	0.27225	S	14	19	0.438702	S	17	20	0.488798	S	13	17	0.35917	S	17	20	0.583912	S	0.310695	15	12	S	18	31	1.99576	S	19	27	1.89361	S	17	26	1.75754	S	17	25
8815	BANF1	8	S	10	24	3.51511	S	11	33	5.09122	S	11	32	5.57739	S	8	21	2.02026	S	11	35	5.33268	S	11	30	4.78142	S	10	30	4.89483	S	4.7175	33	11	S	9	30	4.79702	S	9	28	3.42069	S	9	29	3.63246	S	10	33
1655	DDX5	37.5	S	10	14	0.259694	S	10	10	0.190451	S	14	15	0.342657	S	14	16	0.237238	S	10	11	0.176452	S	13	16	0.314803	S	13	16	0.350406	S	0.362201	17	14	S	20	39	1.2084	S	17	29	0.837295	S	24	44	2.58466	S	30	70
10923	SUB1	10	S	10	17	1.72213	S	9	26	2.02088	S	11	34	2.2666	S	7	12	0.6943	S	14	37	7.14139	S	11	25	3.32575	S	10	19	2.19339	S	1.22021	15	10	S	12	55	8.3838	S	15	45	7.01276	S	13	40	4.10819	S	13	43
55929	DMAP1	29.5	S	10	12	0.140876	S	9	11	0.134477	S	10	13	0.297085	S	11	14	0.208405	S	11	14	0.230683	S	11	12	0.211544	S	13	15	0.317011	S	0.275697	14	12	S	13	18	0.580922	S	12	16	0.409776	S	12	16	0.756912	S	16	21
4781	NFIB	22.6471	S	10	15	0.668392	S	9	13	0.386499	S	9	15	0.7924	S	9	10	0.332584	S	9	16	0.74654	S	11	16	0.6436	S	11	16	0.644991	S	0.6738	15	9	S	9	17	1.13714	S	11	16	0.97402	S	9	18	1.13421	S	10	17
5993	RFX5	37	S	10	13	0.235398	S	8	8	0.159054	S	13	15	0.236266	S	9	11	0.139913	S	9	9	0.136771	S	9	11	0.148943	S	11	12	0.171745	S	0.195575	15	13	S	14	20	0.464809	S	9	10	0.235751	S	20	35	0.966599	S	19	35
4782	NFIC	25.4444	S	10	15	0.489107	S	8	17	0.693628	S	11	19	1.00332	S	8	12	0.226905	S	10	24	1.18806	S	12	24	0.929939	S	11	24	0.936946	S	0.649643	19	10	S	10	25	0.978721	S	13	28	1.47586	S	13	29	1.21043	S	12	26
4150	MAZ	20.8	S	10	28	1.0634	S	8	35	1.09965	S	10	36	2.20252	S	9	28	0.99932	S	10	36	1.61462	S	12	33	1.90925	S	11	37	2.01716	S	0.875547	34	10	S	8	34	2.06799	S	10	40	2.36926	S	7	32	1.76305	S	10	27
10038	PARP2	36	S	10	12	0.314872	S	8	10	0.244918	S	8	13	0.317733	S	9	13	0.216782	S	8	10	0.225877	S	7	7	0.200607	S	9	12	0.314928	S	0.325434	10	9	S	9	15	0.559634	S	8	14	0.524511	S	8	15	0.591293	S	8	11
10432	RBM14	17.3333	S	10	12	0.272098	S	7	10	0.2599	S	12	15	0.478625	S	7	10	0.223587	S	10	11	0.289846	S	10	12	0.296003	S	9	11	0.322672	S	0.302507	12	10	S	9	18	0.527564	S	12	17	0.520722	S	7	12	0.383283	S	9	13
1915	EEF1A1	27	S	10	16	0.602984	S	7	11	0.518414	S	10	17	0.939479	S	7	11	0.311282	S	10	13	0.799719	S	9	14	0.659045	S	9	14	0.604896	S	0.762367	16	10	S	14	41	5.30873	S	14	31	3.73761	S	17	47	9.10565	S	24	78
3183	HNRNPC	23	S	10	18	0.936905	S	7	15	0.662906	S	9	18	0.946647	S	7	12	0.508241	S	12	17	0.935446	S	7	12	0.807918	S	8	14	0.829856	S	0.812354	14	8	S	13	22	2.03904	S	8	18	1.1441	S	11	24	2.13274	S	12	26
4350	MPG	16.6667	S	10	16	0.886186	S	7	10	0.500049	S	9	17	0.78187	S	8	15	0.344911	S	10	15	0.651308	S	9	16	0.617432	S	9	16	0.620217	S	0.542992	15	8	S	12	29	2.21052	S	11	18	1.38033	S	10	19	1.9643	S	10	19
55734	ZFP64	34	S	10	23	0.80314	S	7	18	0.717783	S	8	18	1.00518	S	8	20	0.651209	S	7	13	0.633108	S	9	17	0.623271	S	11	23	1.2279	S	0.986573	22	10	S	7	12	0.375247	S	7	10	0.275689	S	7	14	0.496043	S	5	9
10363	HMG20A	16.5	S	10	13	0.46981	S	7	14	0.401094	S	8	12	0.56748	S	7	9	0.166492	S	7	13	0.413724	S	9	16	0.544175	S	7	13	0.420093	S	0.334887	12	8	S	9	13	0.600868	S	10	21	0.888449	S	8	14	0.686844	S	10	15
83860	TAF3	41	S	10	13	0.192558	S	7	10	0.123587	S	7	9	0.103697	S	5	8	0.0954278	S	2	2	0.0269944	S	7	9	0.0971546	S	7	9	0.107928	S	0.161647	10	8	S	5	6	0.0971116	S	3	4	0.0702747	S	3	4	0.083532	S	2	3
9328	GTF3C5	32.6	S	10	10	0.0595501	S	6	6	0.0507695	S	12	13	0.147359	S	12	13	0.117072	S	13	14	0.145083	S	9	9	0.112603	S	7	7	0.0756025	S	0.17177	16	13	S	18	23	0.632778	S	14	19	0.397965	S	23	35	1.53787	S	28	54
3185	HNRNPF	24	S	10	14	0.638129	S	6	15	0.327648	S	12	16	0.984972	S	7	9	0.250789	S	10	17	0.774438	S	10	17	0.531296	S	10	17	0.770944	S	0.710887	16	9	S	12	24	1.14531	S	13	19	0.879993	S	12	25	1.69092	S	13	30
7023	TFAP4	19	S	10	10	0.161223	S	5	7	0.173597	S	10	12	0.195836	S	6	6	0.0962815	S	14	17	0.336942	S	11	13	0.233455	S	9	9	0.206374	S	0.117241	9	9	S	12	22	0.841799	S	15	26	1.15871	S	11	17	0.851536	S	11	15
1745	DLX1	8.5	S	9	11	0.210962	S	12	15	0.318869	S	10	13	0.318003	S	8	8	0.124289	S	11	13	0.318409	S	10	13	0.208312	S	10	12	0.311992	S	0.173853	10	7	S	6	8	0.223984	S	7	9	0.203059	S	8	10	0.17922	S	6	7
166815	TIGD2	29	S	9	14	0.409747	S	10	14	0.457018	S	12	17	0.597972	S	9	16	0.30335	S	10	15	0.412658	S	11	17	0.48901	S	12	20	0.61419	S	0.429384	15	9	S	7	10	0.318839	S	11	14	0.303205	S	8	10	0.298536	S	7	9
6257	RXRB	22.8333	S	9	12	0.167931	S	10	12	0.190156	S	9	12	0.228815	S	9	11	0.169976	S	9	10	0.118178	S	10	11	0.183419	S	10	12	0.210947	S	0.219138	13	11	S	7	11	0.0993975	S	7	9	0.0472636	S	6	11	0.0905667	S	10	16
203245	NAIF1	16	S	9	17	1.42557	S	9	17	1.33943	S	11	25	2.51446	S	11	21	0.808377	S	11	15	1.68883	S	9	13	0.781661	S	11	19	1.58444	S	0.688392	17	10	S	13	29	2.76993	S	10	22	2.54369	S	12	25	2.56885	S	11	22
7342	UBP1	23.5	S	9	14	0.515214	S	9	14	0.685482	S	11	18	0.872462	S	10	13	0.502679	S	10	16	0.426791	S	9	14	0.683708	S	11	17	0.882396	S	0.846903	19	10	S	13	26	1.61997	S	11	29	1.96875	S	13	27	1.81895	S	10	21
4691	NCL	47	S	9	11	0.115103	S	9	10	0.0685811	S	7	8	0.0441498	S	7	8	0.0643562	S	4	5	0.0281135	S	6	7	0.052025	S	7	9	0.0632247	S	0.0784445	9	7	S	14	20	0.369462	S	13	18	0.380851	S	10	15	0.27928	S	13	22
55775	TDP1	37.6	S	9	13	0.375052	S	8	10	0.258219	S	15	20	0.523071	S	12	15	0.298339	S	8	9	0.197565	S	13	14	0.302887	S	13	16	0.430901	S	0.322404	14	10	S	13	29	0.883767	S	12	22	0.62201	S	12	20	0.67074	S	15	17
11091	WDR5	23	S	9	18	1.15303	S	8	19	1.12537	S	12	28	1.93778	S	8	14	0.619874	S	13	27	1.82502	S	11	23	1.30415	S	9	19	1.19723	S	1.04923	17	9	S	11	32	3.18688	S	14	28	1.98559	S	12	31	3.67411	S	12	30
79718	TBL1XR1	25.5	S	9	11	0.214656	S	8	12	0.283671	S	9	14	0.542432	S	9	12	0.241865	S	9	12	0.316191	S	9	12	0.336804	S	10	14	0.487102	S	0.40531	14	10	S	10	19	0.596611	S	6	9	0.259226	S	10	15	0.503429	S	9	13
3187	HNRNPH1	22.5294	S	9	15	0.31431	S	7	11	0.280978	S	6	8	0.154097	S	9	12	0.0856891	S	8	14	0.279437	S	9	15	0.357438	S	8	14	0.202497	S	0.19867	15	7	S	9	17	0.437046	S	8	13	0.335689	S	11	20	0.661581	S	10	23
4802	NFYC	14.6923	S	9	17	1.04572	S	6	13	0.98282	S	10	19	1.25648	S	7	10	0.611643	S	9	14	0.962104	S	10	17	1.14119	S	8	15	1.09922	S	0.996722	16	8	S	8	13	1.04628	S	8	16	1.18411	S	7	16	1.11741	S	6	10
286257	PAXX	15	S	9	17	1.34356	S	6	17	0.987297	S	9	19	1.44478	S	8	13	0.836667	S	11	18	1.63352	S	9	17	1.53198	S	9	15	1.49751	S	1.29847	17	9	S	7	12	1.4341	S	9	15	1.18048	S	7	10	1.12198	S	10	14
10943	MSL3	31.3333	S	9	10	0.133305	S	6	6	0.100327	S	8	9	0.156254	S	8	8	0.0660322	S	8	8	0.084218	S	6	7	0.0850662	S	9	10	0.146453	S	0.112762	8	7	S	10	15	0.446922	S	13	19	0.460602	S	12	17	0.452337	S	9	12
283899	INO80E	8.57143	S	9	28	1.75783	S	6	25	1.9782	S	7	27	2.227	S	8	26	1.01944	S	11	27	1.75668	S	8	24	1.95696	S	8	25	2.35512	S	1.82657	27	8	S	8	23	1.64982	S	8	15	1.03876	S	8	18	1.49008	S	6	15
9640	ZNF592	73.5	S	9	11	0.170773	S	6	6	0.0719345	S	6	6	0.0886568	S	7	8	0.10365	S	1	1	0.00163461	S	7	9	0.0898174	S	6	7	0.0825494	S	0.0977205	7	5	S	4	4	0.0671471	S	4	5	0.0464215	S	3	4	0.0902895	S	4	5
4000	LMNA	38.125	S	9	9	0.0402966	S	5	5	0.024704	S	9	10	0.0613964	S	13	13	0.083956	S	10	10	0.0690532	S	10	10	0.0571207	S	12	13	0.091038	S	0.0942153	13	12	S	8	10	0.0792569	S	7	7	0.0523361	S	11	12	0.160179	S	25	34
9221	NOLC1	43	S	9	14	0.272474	S	3	9	0.106783	S	9	17	0.42161	S	6	11	0.210881	S	8	10	0.190134	S	9	14	0.238754	S	8	12	0.293308	S	0.228131	13	8	S	23	59	7.74607	S	25	70	7.62027	S	24	63	7.38859	S	21	59
2967	GTF2H3	14	S	8	19	0.605973	S	9	16	0.636299	S	9	21	0.970245	S	8	15	0.324503	S	11	19	0.72695	S	8	19	0.75211	S	8	13	0.584282	S	0.481187	14	6	S	11	27	1.3638	S	11	26	0.90029	S	11	22	1.18702	S	8	15
7014	TERF2	31	S	8	11	0.306432	S	8	14	0.296601	S	10	13	0.465245	S	11	16	0.306738	S	9	12	0.329122	S	9	11	0.354322	S	9	10	0.386383	S	0.423871	14	11	S	28	47	2.83521	S	26	58	3.31248	S	26	44	2.63054	S	21	33
3725	JUN	11	S	8	19	0.907267	S	8	23	0.867657	S	8	17	1.16322	S	9	15	0.508579	S	8	14	1.02328	S	8	15	0.827552	S	10	18	1.13815	S	0.8066	18	8	S	8	18	0.879178	S	7	15	0.739998	S	7	13	0.8227	S	7	9
8427	ZNF282	39.6667	S	8	17	0.235709	S	8	19	0.246924	S	8	16	0.252131	S	9	16	0.204531	S	6	9	0.125679	S	7	16	0.176837	S	9	14	0.335332	S	0.313574	16	11	S	5	5	0.094255	S	6	7	0.0947893	S	3	4	0.0784089	S	1	2
5983	RFC3	12.8889	S	8	13	0.607931	S	7	14	0.565781	S	10	16	0.790312	S	6	10	0.236555	S	12	20	0.818081	S	10	17	0.675086	S	11	18	0.664721	S	0.529203	14	9	S	12	29	2.08533	S	12	26	1.37526	S	13	24	1.84325	S	11	21
6934	TCF7L2	27.8333	S	8	16	0.425849	S	7	13	0.492818	S	10	17	0.530591	S	6	15	0.384609	S	8	12	0.31554	S	8	15	0.501218	S	8	19	0.774752	S	0.495678	17	8	S	6	12	0.23857	S	7	14	0.241856	S	6	9	0.217572	S	4	6
84364	ARFGAP2	31	S	8	9	0.146178	S	7	8	0.0911961	S	8	9	0.206136	S	11	12	0.1739	S	9	10	0.133402	S	9	11	0.142033	S	11	13	0.231923	S	0.282807	14	12	S	15	26	0.654919	S	12	15	0.309051	S	16	37	1.74896	S	20	44
54107	POLE3	10	S	8	20	1.4195	S	7	17	1.50802	S	6	19	1.67847	S	8	14	0.780214	S	9	22	1.52892	S	7	18	1.49307	S	7	18	1.54757	S	1.35389	16	6	S	10	31	3.34467	S	7	25	1.95779	S	10	29	2.09805	S	8	19
51341	ZBTB7A	29	S	8	14	1.17418	S	6	16	2.0923	S	8	18	2.82267	S	7	10	0.338093	S	8	17	2.46674	S	9	20	2.24086	S	9	19	2.2043	S	2.30693	19	9	S	8	18	1.45886	S	8	17	1.25266	S	8	20	1.45053	S	7	20
2625	GATA3	20.5	S	8	18	0.775249	S	6	27	0.562904	S	8	14	0.926341	S	5	11	0.466462	S	8	13	0.772047	S	7	17	0.723845	S	7	13	0.768781	S	0.60937	14	7	S	5	9	0.334046	S	5	9	0.510349	S	5	12	0.559057	S	5	9
9441	MED26	38	S	8	8	0.0869531	S	6	6	0.0882709	S	8	10	0.16483	S	9	9	0.102642	S	6	6	0.0726456	S	5	5	0.0761136	S	7	7	0.148543	S	0.118068	7	7	S	5	5	0.0879963	S	4	4	0.0553863	S	6	6	0.148628	S	4	4
342371	ATXN1L	35	S	8	10	0.223155	S	5	5	0.102537	S	9	11	0.336226	S	9	11	0.263218	S	4	5	0.0994873	S	5	6	0.0710856	S	11	13	0.431547	S	0.2363	11	9	S	17	29	1.40455	S	16	24	1.21386	S	17	27	1.46543	S	15	23
51562	MBIP	23.6667	S	8	8	0.108239	S	5	5	0.0708587	S	7	8	0.118314	S	6	6	0.0526814	S	8	9	0.0929774	S	9	10	0.109468	S	11	11	0.131583	S	0.073596	5	5	S	8	8	0.215328	S	6	6	0.147127	S	9	9	0.293482	S	5	6
10524	KAT5	31.6	S	8	8	0.0730556	S	5	5	0.06253	S	7	11	0.1555	S	7	8	0.0631293	S	7	8	0.091649	S	4	5	0.0734134	S	7	8	0.125166	S	0.10983	8	7	S	11	14	0.311385	S	10	12	0.123991	S	13	17	0.447328	S	10	13
9188	DDX21	41	S	8	9	0.102209	S	5	6	0.0487162	S	7	7	0.0636409	S	6	6	0.089356	S	3	5	0.0299652	S	7	8	0.0568894	S	6	7	0.0544296	S	0.0661309	8	7	S	18	29	2.6588	S	19	28	2.22358	S	19	37	3.14862	S	20	32
92105	INTS4	53.75	S	8	9	0.098748	S	5	6	0.0480035	S	6	7	0.0586974	S	5	5	0.0423038	S	2	2	0.00756816	S	5	6	0.0375379	S	6	7	0.057053	S	0.0947913	10	8	S	17	25	0.575901	S	13	18	0.239261	S	25	35	0.853896	S	22	39
1153	CIRBP	15.75	S	8	10	0.367747	S	4	9	0.418558	S	9	10	0.538222	S	7	11	0.178213	S	10	18	0.737606	S	8	14	0.613659	S	6	8	0.302234	S	0.33369	9	6	S	11	17	0.77032	S	11	18	0.831399	S	10	14	0.561233	S	11	17
2120	ETV6	20	S	8	12	0.230158	S	4	5	0.185906	S	7	11	0.23731	S	7	12	0.182893	S	8	10	0.203219	S	7	9	0.27542	S	7	10	0.289602	S	0.246989	10	8	S	12	16	0.4303	S	8	16	0.405939	S	7	11	0.395795	S	8	11
3840	KPNA4	25	S	8	12	0.114268	S	4	6	0.140694	S	6	8	0.239024	S	6	7	0.041487	S	6	7	0.183657	S	7	8	0.194276	S	7	10	0.228122	S	0.142679	6	6	S	9	12	0.38334	S	9	13	0.4366	S	10	15	0.473083	S	8	8
10474	TADA3	24.5	S	8	9	0.163062	S	3	4	0.0666147	S	6	7	0.163445	S	5	6	0.0743061	S	6	6	0.122222	S	7	8	0.134848	S	6	7	0.136754	S	0.0969391	5	4	S	6	8	0.221937	S	8	11	0.315905	S	8	11	0.537989	S	9	11
83444	INO80B	19	S	8	9	0.380127	S	3	8	0.183114	S	4	6	0.270491	S	4	4	0.145761	S	5	5	0.359282	S	4	4	0.0800857	S	7	10	0.4318	S	0.321524	7	6	S	7	10	0.807895	S	7	9	0.66091	S	6	6	0.669864	S	7	9
10629	TAF6L	32	S	7	8	0.124253	S	8	10	0.127258	S	11	12	0.333906	S	8	10	0.153728	S	8	9	0.193451	S	9	9	0.12972	S	8	8	0.171123	S	0.162988	9	8	S	12	17	0.471961	S	11	15	0.429381	S	12	16	0.693323	S	15	20
7019	TFAM	16.3333	S	7	11	0.382164	S	8	11	0.375284	S	9	11	0.566002	S	9	11	0.275344	S	12	16	0.593094	S	9	12	0.429284	S	8	12	0.412069	S	0.373707	12	9	S	12	27	1.64244	S	9	14	0.579305	S	10	19	1.06032	S	11	13
116028	RMI2	9	S	7	17	0.81797	S	8	14	0.723316	S	7	17	0.951098	S	8	14	0.529184	S	8	18	0.948997	S	9	18	0.835115	S	8	16	0.868087	S	0.756803	17	8	S	10	30	2.60096	S	10	35	2.27114	S	11	25	1.81899	S	9	26
1999	ELF3	13	S	7	10	0.522609	S	8	11	0.598581	S	7	11	0.728913	S	4	6	0.211343	S	8	11	0.591256	S	7	10	0.656195	S	7	10	0.552165	S	0.575181	9	6	S	5	6	0.143714	S	5	5	0.153586	S	4	4	0.135046	S	4	4
4361	MRE11	38	S	7	8	0.138844	S	7	8	0.109472	S	14	15	0.271461	S	11	12	0.157246	S	10	10	0.124614	S	11	12	0.111863	S	17	17	0.315806	S	0.255596	15	14	S	30	54	3.20726	S	25	46	2.15566	S	32	63	4.4849	S	31	57
1385	CREB1	6.66667	S	7	31	6.31453	S	7	35	5.80622	S	8	30	6.38065	S	6	22	3.17696	S	9	28	6.17356	S	7	27	5.3858	S	7	27	5.95765	S	5.05675	29	6	S	9	29	8.18616	S	6	28	8.33165	S	9	28	8.08275	S	7	23
7029	TFDP2	13.4	S	7	11	0.0915533	S	7	8	0.0747493	S	7	8	0.0875553	S	4	4	0.0152628	S	5	5	0.0557779	S	6	8	0.0743132	S	7	10	0.0761691	S	0.0503256	9	5	S	13	22	0.312009	S	12	22	0.454546	S	12	18	0.38025	S	9	12
79618	HMBOX1	23	S	7	9	0.25775	S	7	9	0.231244	S	5	7	0.253449	S	7	9	0.186998	S	7	9	0.262652	S	6	8	0.19241	S	6	8	0.239627	S	0.193421	8	6	S	10	26	2.14223	S	10	23	2.07371	S	10	23	2.14331	S	9	22
51043	ZBTB7B	24	S	7	18	2.47417	S	6	20	3.09729	S	8	31	5.04922	S	9	27	3.17766	S	10	24	3.56152	S	9	27	3.7807	S	9	34	4.97813	S	4.23167	31	9	S	10	58	12.0809	S	10	57	10.8473	S	9	55	11.5404	S	11	44
23435	TARDBP	20	S	7	13	0.472709	S	6	11	0.41651	S	8	12	0.666719	S	3	7	0.188078	S	7	12	0.47986	S	6	12	0.534744	S	7	12	0.498324	S	0.323415	8	5	S	9	21	1.86512	S	9	25	2.1663	S	9	18	1.40876	S	10	19
124944	C17orf49	9	S	7	10	0.283997	S	6	8	0.263624	S	7	10	0.408793	S	6	7	0.152159	S	7	10	0.312301	S	6	7	0.148863	S	5	7	0.232479	S	0.246422	7	5	S	5	9	0.629269	S	4	6	0.271741	S	6	8	0.500431	S	5	7
466	ATF1	8.66667	S	7	22	0.967049	S	6	26	0.617366	S	6	16	1.34747	S	8	18	0.679821	S	9	20	1.40446	S	8	20	1.18433	S	9	21	1.00168	S	0.8194	23	9	S	10	29	5.05688	S	11	29	3.14914	S	10	25	3.61115	S	9	23
1390	CREM	6.34545	S	7	21	1.38389	S	6	23	1.75016	S	6	21	1.85748	S	5	15	0.835952	S	8	23	1.98585	S	8	20	1.75202	S	6	18	1.74784	S	1.52034	20	6	S	8	23	3.25134	S	6	21	2.13204	S	6	16	2.3627	S	6	20
10025	MED16	50.3333	S	7	11	0.220026	S	5	9	0.55213	S	16	20	0.831262	S	12	18	0.622311	S	5	5	0.0457769	S	8	12	0.620878	S	12	15	0.824568	S	0.754149	16	13	S	10	18	0.434956	S	5	10	0.216987	S	12	16	0.681213	S	7	16
3159	HMGA1	5.33333	S	7	22	1.0746	S	5	13	1.02539	S	9	20	1.39247	S	5	11	0.542939	S	10	27	4.19209	S	6	15	0.88591	S	7	13	0.738345	S	0.515603	15	6	S	7	20	2.1076	S	9	20	2.77696	S	7	17	1.75722	S	7	15
60686	C14orf93	25.6667	S	7	11	0.526633	S	5	10	0.354192	S	8	13	0.676203	S	10	15	0.407809	S	9	10	0.423607	S	8	12	0.452399	S	12	18	0.84658	S	0.687257	17	12	S	9	13	1.32155	S	11	15	0.363544	S	7	11	0.311545	S	4	4
9898	UBAP2L	38.25	S	7	8	0.157924	S	5	6	0.0688754	S	4	4	0.0662063	S	4	5	0.0805134	S	1	3	0.0197625	S	5	7	0.0724772	S	4	6	0.060138	S	0.0995464	6	5	S	6	7	0.254245	S	3	3	0.0412828	S	13	18	0.764776	S	16	19
55758	RCOR3	31.05	S	6	8	0.019169	S	8	13	0.0856621	S	8	15	0.102577	S	10	18	0.0705096	S	11	17	0.0938041	S	10	15	0.105681	S	13	22	0.150528	S	0.0800478	16	10	S	11	18	0.135419	S	10	16	0.106691	S	7	9	0.0204198	S	10	14
9425	CDYL	28.6667	S	6	8	0.146389	S	7	9	0.231053	S	12	15	0.410302	S	12	16	0.202213	S	11	12	0.253766	S	10	11	0.280588	S	10	11	0.345988	S	0.17478	10	8	S	13	20	0.924466	S	13	27	0.937726	S	11	18	0.757641	S	14	20
8939	FUBP3	33.625	S	6	6	0.0986812	S	7	7	0.113713	S	9	9	0.154147	S	8	8	0.125988	S	7	7	0.0980015	S	7	7	0.096714	S	6	6	0.135281	S	0.160422	8	8	S	9	12	0.185794	S	9	10	0.230697	S	9	10	0.336799	S	17	25
57621	ZBTB2	24.5	S	6	7	0.224113	S	7	8	0.216963	S	8	10	0.275753	S	6	6	0.137694	S	6	8	0.155545	S	8	10	0.234244	S	8	9	0.273657	S	0.248954	9	7	S	10	20	1.0227	S	7	15	0.809167	S	10	20	1.05369	S	8	17
7030	TFE3	24	S	6	6	0.16427	S	6	7	0.234215	S	8	9	0.339794	S	8	11	0.307147	S	7	8	0.267658	S	6	7	0.288171	S	8	9	0.326954	S	0.206885	7	7	S	6	9	0.34377	S	7	10	0.38044	S	7	10	0.425096	S	6	6
7181	NR2C1	28.625	S	6	9	0.123008	S	6	9	0.129725	S	8	10	0.188483	S	7	9	0.133902	S	6	6	0.0714701	S	7	8	0.183897	S	7	9	0.205383	S	0.170748	8	7	S	13	19	0.588989	S	12	23	0.680455	S	12	20	0.585575	S	8	11
54386	TERF2IP	24	S	6	7	0.15174	S	6	8	0.193825	S	7	8	0.225241	S	7	8	0.152332	S	6	7	0.205373	S	8	10	0.240991	S	8	9	0.222288	S	0.152186	6	4	S	11	20	1.47369	S	15	26	1.65006	S	11	20	1.47417	S	12	19
79047	KCTD15	16	S	6	8	0.100369	S	6	7	0.119874	S	6	6	0.131337	S	6	6	0.0564943	S	5	6	0.137345	S	7	7	0.131562	S	7	7	0.135122	S	0.104188	7	7	S	13	18	0.753804	S	8	10	0.370969	S	9	14	0.593615	S	8	11
9278	ZBTB22	30	S	6	9	0.28331	S	6	9	0.275265	S	5	8	0.33995	S	4	7	0.149968	S	5	8	0.184017	S	5	10	0.281864	S	7	10	0.375325	S	0.294954	8	6	S	2	2	0.0497207	S	3	4	0.0480896	S	2	2	0.0487748	S	1	1
8971	H1FX	12	S	6	12	0.424164	S	5	7	0.404078	S	9	19	0.763077	S	7	14	0.294691	S	9	16	0.774393	S	6	11	0.558472	S	6	11	0.486324	S	0.355501	9	6	S	8	10	0.396114	S	8	10	0.28298	S	5	6	0.316284	S	5	6
3169	FOXA1	17.5	S	6	18	1.04272	S	5	10	0.906128	S	7	17	1.3922	S	6	12	0.461828	S	6	10	0.929659	S	5	10	0.797686	S	7	16	1.19159	S	0.972292	12	7	S	5	18	1.37671	S	5	17	1.66149	S	6	19	1.73423	S	5	14
100128927	ZBTB42	27	S	6	7	0.152023	S	5	8	0.140551	S	5	9	0.158358	S	6	7	0.0789754	S	8	9	0.171617	S	7	8	0.193393	S	9	11	0.182548	S	0.145159	7	7	S	5	5	0.0980447	S	7	8	0.138513	S	5	6	0.0951645	S	5	6
653121	ZBTB8A	22.5	S	6	7	0.0512219	S	5	5	0.0880317	S	3	5	0.061477	S	6	6	0.0985444	S	4	5	0.0762553	S	6	6	0.103934	S	6	6	0.129361	S	0.0763518	4	4	S	7	11	0.345151	S	9	14	0.429999	S	8	11	0.339072	S	5	7
2017	CTTN	27	S	6	6	0.0961656	S	4	4	0.0459722	S	9	9	0.167051	S	10	11	0.163518	S	4	5	0.0672873	S	4	4	0.0630258	S	8	8	0.148442	S	0.227019	12	12	S	3	5	0.102376	S	2	3	0.0313723	S	12	19	0.509778	S	19	30
6015	RING1	20	S	6	11	0.265077	S	4	8	0.210852	S	6	10	0.285816	S	5	7	0.119599	S	7	13	0.236086	S	6	11	0.273178	S	5	8	0.206318	S	0.196697	10	6	S	5	10	0.454932	S	7	10	0.228514	S	7	13	0.564104	S	6	13
4899	NRF1	11.6667	S	6	8	0.254225	S	4	6	0.191043	S	6	9	0.298644	S	5	9	0.217271	S	5	7	0.192358	S	5	6	0.248575	S	5	7	0.253271	S	0.269237	6	5	S	5	10	0.587382	S	6	10	0.572346	S	7	10	0.645564	S	6	7
8545	CGGBP1	12	S	6	9	0.226292	S	4	6	0.17278	S	4	7	0.214471	S	3	4	0.0870218	S	5	6	0.132695	S	3	5	0.110094	S	5	7	0.148343	S	0.128858	5	3	S	3	5	0.236761	S	3	5	0.19564	S	3	4	0.162733	S	2	3
29844	TFPT	10.6667	S	6	8	0.29708	S	3	4	0.1271	S	5	5	0.339609	S	3	3	0.100411	S	6	9	0.720642	S	4	5	0.226563	S	4	6	0.230681	S	0.134004	1	1	S	5	7	0.538173	S	4	5	0.324483	S	6	8	0.532742	S	4	4
56829	ZC3HAV1	58	S	6	8	0.0469463	S	3	4	0.0330141	S	5	7	0.0451374	S	4	4	0.0153401	S	2	2	0.00732823	S	3	3	0.0255895	S	3	6	0.043927	S	0.0587033	8	5	S	18	26	0.686019	S	13	21	0.422534	S	17	24	0.709579	S	10	13
6879	TAF7	21	S	6	8	0.116841	S	3	3	0.0397494	S	4	4	0.084461	S	3	3	0.0380349	S	6	6	0.0786371	S	5	5	0.0932434	S	5	7	0.0635545	S	0.067314	5	5	S	6	6	0.0755746	S	6	6	0.103662	S	5	6	0.119579	S	3	4
5725	PTBP1	25	S	5	6	0.0957073	S	6	8	0.097869	S	8	10	0.167364	S	4	6	0.0867222	S	6	8	0.205569	S	6	6	0.0918418	S	5	8	0.131443	S	0.249064	12	8	S	10	16	0.619165	S	11	16	0.61299	S	15	46	3.08253	S	22	105
7027	TFDP1	15.25	S	5	10	0.136296	S	6	9	0.303594	S	7	9	0.242854	S	5	6	0.0800622	S	5	7	0.29987	S	6	10	0.375672	S	6	11	0.247652	S	0.264016	13	7	S	11	23	1.19876	S	12	25	1.28983	S	11	17	1.03999	S	9	15
64858	DCLRE1B	26.5	S	5	6	0.0649917	S	6	6	0.0745662	S	6	6	0.0917125	S	5	7	0.0607061	S	4	4	0.0532511	S	7	8	0.0937794	S	5	5	0.0867314	S	0.0843471	6	6	S	13	17	0.59236	S	14	22	0.655782	S	14	23	0.719504	S	10	13
84656	GLYR1	30.9167	S	5	6	0.0708056	S	5	5	0.0980602	S	5	5	0.100032	S	3	4	0.0461905	S	8	8	0.099492	S	6	10	0.0760844	S	6	6	0.105275	S	0.0647974	5	4	S	4	5	0.1032	S	8	11	0.155165	S	9	12	0.234251	S	6	7
29079	MED4	14.6667	S	5	5	0.062889	S	4	5	0.0462899	S	8	9	0.181548	S	4	5	0.0538813	S	8	9	0.125528	S	5	6	0.0840727	S	5	6	0.0899606	S	0.0538805	5	4	S	10	11	0.193233	S	9	11	0.149043	S	12	18	0.435286	S	11	14
79577	CDC73	28.5	S	5	5	0.0490301	S	4	4	0.0406164	S	8	9	0.0949263	S	7	7	0.0719671	S	7	8	0.0484497	S	10	10	0.0954818	S	13	13	0.13246	S	0.0912989	9	9	S	11	12	0.161966	S	12	12	0.149273	S	14	17	0.291742	S	15	19
26528	DAZAP1	12.7692	S	5	7	0.217818	S	4	9	0.25267	S	6	9	0.262115	S	4	4	0.0401932	S	5	11	0.266178	S	5	11	0.352185	S	5	10	0.247589	S	0.20116	8	4	S	9	14	0.502898	S	8	16	0.655921	S	8	11	0.486047	S	8	15
117143	TADA1	17	S	5	5	0.216017	S	4	5	0.090395	S	5	6	0.313682	S	3	4	0.131587	S	5	6	0.164933	S	3	4	0.0984635	S	2	3	0.111836	S	0.0941708	3	2	S	6	9	0.584446	S	7	8	0.408988	S	8	10	0.756865	S	9	10
6119	RPA3	9	S	5	25	5.22772	S	4	19	7.17421	S	4	25	7.95283	S	5	22	3.65555	S	4	25	7.39111	S	4	19	6.75866	S	5	20	6.66154	S	6.10478	23	4	S	6	39	12.8987	S	7	38	7.8398	S	7	31	8.16387	S	6	33
23099	ZBTB43	27	S	5	7	0.140299	S	4	7	0.156117	S	3	4	0.144064	S	6	8	0.101472	S	5	5	0.110527	S	5	7	0.152483	S	6	9	0.187298	S	0.146875	8	5	S	2	6	0.293338	S	5	8	0.375822	S	4	8	0.295528	S	2	4
1747	DLX3	13	S	5	5	0.142727	S	4	6	0.11011	S	3	3	0.134505	S	3	3	0.0594747	S	5	5	0.193824	S	3	3	0.0592872	S	4	4	0.127455	S	0.103886	4	4	S	4	4	0.124981	S	4	4	0.109383	S	3	3	0.107279	S	3	4
27097	TAF5L	25.5	S	5	7	0.0735964	S	3	3	0.0519885	S	10	12	0.230859	S	9	9	0.139218	S	7	7	0.112877	S	7	8	0.0895747	S	8	8	0.148449	S	0.142998	8	8	S	13	16	0.441728	S	14	21	0.475277	S	14	17	0.575068	S	10	14
339287	MSL1	27.25	S	5	9	0.172223	S	3	5	0.163401	S	8	9	0.273912	S	5	7	0.135052	S	5	6	0.115628	S	5	8	0.139554	S	8	12	0.254841	S	0.234887	11	7	S	7	14	0.419723	S	6	13	0.3444	S	5	10	0.379757	S	6	12
58495	OVOL2	13	S	5	6	0.0602979	S	3	4	0.0201351	S	4	5	0.0529603	S	2	3	0.0305439	S	4	4	0.0386092	S	4	5	0.035718	S	5	5	0.0416972	S	0.0449447	5	4	S	5	6	0.196071	S	6	6	0.119551	S	6	7	0.213445	S	3	3
112869	SGF29	19	S	5	6	0.11546	S	3	4	0.0772055	S	3	4	0.146329	S	5	7	0.0614499	S	3	4	0.0868178	S	4	6	0.106918	S	4	5	0.112239	S	0.100324	5	4	S	6	9	0.398716	S	5	7	0.264524	S	6	8	0.414535	S	7	12
3005	H1F0	7	S	5	8	0.173202	S	2	4	0.198128	S	4	6	0.268362	S	3	4	0.107192	S	7	12	0.431809	S	4	5	0.216802	S	4	7	0.158468	S	0.0745366	4	3	S	6	9	0.295421	S	5	6	0.15933	S	6	8	0.152548	S	5	6
54799	MBTD1	34.7692	S	4	5	0.143053	S	8	8	0.130724	S	5	5	0.147937	S	7	7	0.161835	S	5	5	0.112514	S	6	6	0.137824	S	7	8	0.194321	S	0.171288	7	7	S	6	7	0.106382	S	6	6	0.108204	S	9	13	0.288493	S	6	6
25926	NOL11	39.5	S	4	4	0.0553017	S	6	6	0.0618914	S	8	8	0.0831047	S	5	5	0.0490201	S	5	5	0.0359791	S	6	6	0.0705188	S	7	7	0.102249	S	0.0879008	7	7	S	11	17	0.663148	S	8	14	0.389912	S	11	20	0.812132	S	13	22
10522	DEAF1	25.7143	S	4	17	0.283034	S	6	17	0.38291	S	7	17	0.429079	S	5	15	0.273337	S	7	11	0.288865	S	7	13	0.411422	S	7	15	0.410718	S	0.456258	19	7	S	5	14	0.318247	S	6	11	0.256707	S	6	11	0.268221	S	6	10
5093	PCBP1	22	S	4	5	0.341473	S	6	11	0.169701	S	6	8	0.142301	S	6	10	0.287263	S	9	17	0.868618	S	5	9	0.199482	S	5	6	0.167777	S	0.678284	14	8	S	9	22	1.06622	S	9	17	0.628458	S	11	42	5.93075	S	16	126
84759	PCGF1	13	S	4	4	0.0854704	S	5	5	0.108384	S	6	6	0.143911	S	1	1	0.0124122	S	5	5	0.0721878	S	4	4	0.108664	S	3	3	0.101698	S	0.0869094	3	3	S	9	11	0.379703	S	8	9	0.194904	S	10	11	0.292105	S	4	6
1025	CDK9	24	S	4	4	0.048829	S	5	5	0.0563672	S	6	6	0.0932124	S	3	3	0.0308867	S	4	4	0.0384261	S	6	6	0.0601475	S	5	5	0.0603745	S	0.0613576	6	5	S	8	10	0.365423	S	8	9	0.25891	S	9	14	0.529483	S	8	12
124540	MSI2	13.0909	S	4	6	0.125951	S	5	6	0.179822	S	5	7	0.246285	S	3	3	0.0377738	S	4	6	0.159236	S	6	8	0.222449	S	5	6	0.143745	S	0.161856	6	4	S	8	8	0.248584	S	5	7	0.196921	S	4	5	0.263007	S	3	4
406	ARNTL	18.8235	S	4	5	0.0863522	S	5	5	0.0929849	S	4	5	0.0736992	S	4	4	0.0542227	S	4	4	0.0448516	S	6	7	0.0887669	S	5	5	0.123594	S	0.0883756	3	3	S	7	8	0.140694	S	6	9	0.0912997	S	4	4	0.12507	S	4	4
84458	LCOR	45.6667	S	4	5	0.0734498	S	4	4	0.0763233	S	6	7	0.132509	S	4	4	0.0429475	S	5	5	0.0789385	S	7	7	0.143258	S	7	8	0.162997	S	0.138501	7	6	S	4	4	0.146079	S	8	8	0.223274	S	5	6	0.194927	S	4	5
3280	HES1	12	S	4	5	0.287954	S	4	5	0.265797	S	5	6	0.333977	S	4	4	0.118582	S	7	8	0.400008	S	5	6	0.188843	S	4	5	0.296808	S	0.210852	4	4	S	6	9	0.585945	S	6	10	0.391357	S	5	8	0.427955	S	4	5
54973	INTS11	36.25	S	4	5	0.0840578	S	4	5	0.0738916	S	5	6	0.0904788	S	6	8	0.086607	S	4	4	0.0419184	S	6	7	0.0884899	S	8	11	0.128632	S	0.0984878	7	6	S	11	16	0.341424	S	10	15	0.356193	S	11	16	0.521695	S	11	15
7716	VEZF1	29	S	4	9	0.685718	S	4	20	0.61515	S	5	11	0.88531	S	4	8	0.635668	S	4	5	0.52784	S	4	8	0.717534	S	5	12	0.942252	S	0.833881	11	6	S	5	11	1.26214	S	6	14	1.36854	S	6	12	1.36166	S	5	9
171017	ZNF384	25.9091	S	4	6	0.213816	S	4	11	0.24391	S	4	7	0.317572	S	5	8	0.239556	S	5	10	0.261139	S	5	9	0.301149	S	5	10	0.353969	S	0.277361	10	7	S	8	22	0.812124	S	7	21	0.957171	S	6	16	0.655463	S	6	14
54108	CHRAC1	6	S	4	7	0.668957	S	4	9	0.662619	S	4	8	0.862114	S	4	6	0.413537	S	4	8	0.818573	S	4	8	0.726108	S	4	7	0.750512	S	0.62884	6	3	S	4	9	1.80683	S	3	8	1.11755	S	3	8	1.00822	S	3	8
90390	MED30	11	S	4	5	0.105939	S	3	4	0.0732525	S	5	7	0.221007	S	4	5	0.0864965	S	4	5	0.0823976	S	4	7	0.0984774	S	3	4	0.0548729	S	0.0600655	3	3	S	5	8	0.322684	S	5	6	0.117381	S	5	9	0.288146	S	5	9
55174	INTS10	42.8889	S	4	4	0.0620202	S	3	3	0.0346577	S	5	5	0.0806677	S	8	8	0.0922295	S	2	2	0.0207138	S	3	3	0.0381627	S	4	4	0.0792013	S	0.0680139	4	4	S	9	13	0.306772	S	5	6	0.136599	S	12	15	0.374368	S	13	17
3202	HOXA5	15	S	4	6	0.0830569	S	3	3	0.0424557	S	4	4	0.0793526	S	4	4	0.0316894	S	5	5	0.0790342	S	3	3	0.0415669	S	4	4	0.059903	S	0.027383	3	3	S	4	7	0.288418	S	4	8	0.208337	S	4	8	0.246316	S	2	5
10362	HMG20B	18.6667	S	4	4	0.0402911	S	3	3	0.0343988	S	4	4	0.0518327	S	2	2	0.0189068	S	5	5	0.0384145	S	2	2	0.0306091	S	2	2	0.0336407	S	0.029658	2	2	S	6	6	0.149492	S	4	5	0.0887942	S	6	7	0.188743	S	4	4
10189	ALYREF	16	S	4	7	0.170126	S	3	5	0.108392	S	4	6	0.194562	S	2	3	0.0628257	S	4	8	0.255635	S	3	5	0.0994883	S	3	5	0.11445	S	0.097154	5	3	S	5	18	2.52799	S	6	13	1.17268	S	6	15	2.04188	S	4	17
25913	POT1	34	S	4	4	0.0212436	S	3	3	0.0297202	S	4	4	0.0431874	S	3	3	0.0178833	S	3	3	0.0279452	S	6	6	0.0562458	S	6	6	0.0669067	S	0.0410078	4	4	S	11	12	0.39721	S	12	15	0.449789	S	12	14	0.407874	S	12	12
23160	WDR43	43	S	4	4	0.0524106	S	3	3	0.0431125	S	4	4	0.0702028	S	3	6	0.050374	S	3	3	0.0377922	S	3	3	0.0532503	S	4	5	0.0825752	S	0.0699175	7	4	S	10	23	0.710375	S	10	26	0.650813	S	11	27	0.806461	S	11	24
6727	SRP14	6.5	S	4	5	0.0711485	S	3	6	0.107359	S	3	4	0.110517	S	4	4	0.0275481	S	3	6	0.105572	S	4	4	0.105206	S	4	5	0.0838469	S	0.115597	6	4	S	4	4	0.268801	S	4	4	0.150396	S	3	4	0.266373	S	4	11
5935	RBM3	8	S	4	10	0.392865	S	3	6	0.267285	S	2	5	0.231059	S	3	7	0.137381	S	3	6	0.186638	S	4	6	0.331771	S	3	8	0.237915	S	0.292898	8	4	S	4	12	0.9995	S	4	15	0.891422	S	4	11	0.571807	S	5	12
3104	ZBTB48	26	S	4	5	0.0632775	S	3	4	0.0284286	S	2	2	0.0308592	S	4	4	0.0577117	S	2	2	0.0189691	S	3	4	0.0620637	S	3	3	0.0789017	S	0.0779691	5	4	S	1	1	0.0159692	S	1	1	0.0148441	S	1	1	0.0183528	S	2	2
3313	HSPA9	44	S	4	4	0.0274639	S	2	2	0.0144228	S	3	3	0.0213811	S	3	3	0.0223878	S	2	2	0.0062378	S	3	3	0.0189368	S	4	5	0.0308182	S	0.0237143	4	4	S	6	7	0.341787	S	4	4	0.0586616	S	6	9	0.594278	S	7	11
57215	THAP11	10	S	4	5	0.0775315	S	2	3	0.038319	S	2	3	0.0530822	S	2	3	0.026398	S	1	2	0.0363649	S	1	2	0.0388864	S	2	2	0.0456954	S	0.046509	3	2	S	2	3	0.0453229	S	3	4	0.0436465	S	5	6	0.149709	S	5	6
8089	YEATS4	14	S	4	5	0.0733877	S	1	2	0.0428988	S	2	2	0.0232916	S	3	4	0.0452127	S	3	4	0.0643369	S	3	4	0.0812832	S	3	4	0.082349	S	0.0822633	5	4	S	4	6	0.179924	S	5	7	0.105373	S	4	7	0.21768	S	5	7
9584	RBM39	22.5	S	3	4	0.0869319	S	6	6	0.0942601	S	5	5	0.119892	S	5	7	0.105072	S	6	6	0.116977	S	6	7	0.101459	S	7	7	0.132715	S	0.181391	9	8	S	9	14	0.551732	S	11	17	0.433834	S	15	25	1.34431	S	18	39
6944	VPS72	13	S	3	4	0.087194	S	4	5	0.0681825	S	6	6	0.149128	S	3	4	0.0400223	S	5	5	0.0934061	S	4	4	0.0806957	S	3	3	0.0818724	S	0.0792545	4	4	S	2	4	0.146599	S	3	5	0.130038	S	3	6	0.221746	S	4	9
4209	MEF2D	22.5	S	3	4	0.0710378	S	3	3	0.0198288	S	6	6	0.0964106	S	3	3	0.0567434	S	4	5	0.0616966	S	3	3	0.0550334	S	4	4	0.0748984	S	0.0518918	3	3	S	8	9	0.302719	S	9	9	0.236485	S	8	9	0.359581	S	6	7
6605	SMARCE1	26	S	3	3	0.0276749	S	3	3	0.0233085	S	4	4	0.0461006	S	4	4	0.039784	S	3	3	0.0328527	S	3	3	0.0304739	S	3	3	0.0361663	S	0.02815	3	3	S	2	2	0.0188802	S	2	2	0.0109425	S	4	4	0.0906115	S	8	10
22913	RALY	20.5	S	3	3	0.0281623	S	3	3	0.0265165	S	3	3	0.0333703	S	3	3	0.0165909	S	3	3	0.0173668	S	3	3	0.0282823	S	4	4	0.0361201	S	0.0334715	4	4	S	1	1	0.0206426	S	1	1	0.012729	S	4	4	0.0545697	S	5	5
57332	CBX8	24	S	3	3	0.0219711	S	3	3	0.0333586	S	2	2	0.0192191	S	2	2	0.0102811	S	3	3	0.0275165	S	4	4	0.0472846	S	5	5	0.0491249	S	0.0356645	4	4	S	8	8	0.175018	S	5	5	0.0790446	S	10	10	0.26344	S	9	11
9477	MED20	8.33333	S	3	3	0.0512322	S	2	2	0.0692172	S	5	7	0.175419	S	3	5	0.0428741	S	4	4	0.108469	S	5	5	0.118756	S	3	3	0.045235	S	0.0965717	5	5	S	5	10	0.249076	S	6	9	0.138862	S	5	9	0.266722	S	4	6
6837	MED22	11.5	S	3	3	0.0273352	S	2	3	0.0450531	S	3	5	0.100564	S	1	1	0.00883766	S	5	7	0.059829	S	3	4	0.0457482	S	2	3	0.0394063	S	0.0287049	2	2	S	2	3	0.056788	S	2	3	0.0316726	S	3	4	0.101261	S	3	5
283337	ZNF740	16.5	S	3	4	0.0474207	S	2	3	0.0266056	S	3	5	0.0653408	S	3	3	0.0184685	S	3	3	0.0375897	S	3	4	0.0314523	S	3	5	0.0415428	S	0.0225911	5	3	S	4	5	0.0662171	S	4	5	0.0461397	S	4	6	0.0944	S	4	5
7507	XPA	10.6667	S	3	4	0.104057	S	2	3	0.0969744	S	3	4	0.118734	S	2	3	0.037512	S	3	4	0.0889339	S	2	2	0.0808602	S	2	3	0.0912304	S	0.0975249	4	3	S	2	2	0.0493493	S	1	1	0.0201038	S	2	2	0.0324306	S	2	2
6222	RPS18	12	S	3	3	0.0226137	S	2	2	0.0116923	S	3	3	0.028448	S	3	3	0.0219037	S	1	1	0.0035529	S	3	3	0.0310048	S	2	2	0.0207959	S	0.0367778	4	4	S	3	5	0.111353	S	5	5	0.0857263	S	4	6	0.127307	S	7	10
5994	RFXAP	11	S	3	4	0.0428165	S	2	3	0.0286296	S	2	2	0.0357075	S	2	3	0.020947	S	2	2	0.0294414	S	1	1	0.0226737	S	2	2	0.0280325	S	0.0283021	2	2	S	2	2	0.0960439	S	3	3	0.0828792	S	2	2	0.101059	S	2	2
25842	ASF1A	10	S	2	2	0.0749935	S	3	8	0.193794	S	4	5	0.363326	S	2	2	0.110475	S	6	11	0.481175	S	2	4	0.19553	S	3	6	0.269059	S	0.211366	6	3	S	6	11	0.848489	S	5	10	0.565097	S	5	6	0.527046	S	6	12
112950	MED8	17	S	2	3	0.0887574	S	3	4	0.0908009	S	3	5	0.20431	S	2	3	0.0686048	S	2	3	0.102079	S	3	6	0.140193	S	2	3	0.0829201	S	0.0561066	4	2	S	3	5	0.210247	S	4	6	0.110252	S	3	7	0.271017	S	3	7
404672	GTF2H5	5	S	2	4	0.170682	S	3	4	0.189527	S	2	3	0.103357	S	2	2	0.0352184	S	3	4	0.0594924	S	3	4	0.193651	S	3	3	0.064197	S	0.0966894	4	3	S	2	4	0.243148	S	2	3	0.1113	S	1	3	0.134975	S	1	3
2962	GTF2F1	26.5	S	2	2	0.0474767	S	2	2	0.0398805	S	3	3	0.0594732	S	2	2	0.0381936	S	4	5	0.0571482	S	3	5	0.0643427	S	4	4	0.0529822	S	0.0654217	6	5	S	2	3	0.0500579	S	3	3	0.0306536	S	2	3	0.0422714	S	2	2
1994	ELAVL1	19	S	2	2	0.0188567	S	2	2	0.0212422	S	3	3	0.0266442	S	1	1	0.0120519	S	2	2	0.0249101	S	3	3	0.0291906	S	2	2	0.0199978	S	0.0227487	2	2	S	5	5	0.0541431	S	3	3	0.0263506	S	7	7	0.0920223	S	8	9
3225	HOXC9	14	S	2	2	0.0229222	S	2	2	0.0265918	S	3	3	0.045567	S	2	2	0.014362	S	1	1	0.0196257	S	1	1	0.017046	S	3	4	0.0466489	S	0.0318226	4	4	S	3	3	0.0426612	S	2	3	0.0227977	S	1	2	0.020977	S	1	1
80335	WDR82	18.5	S	2	2	0.0176378	S	2	2	0.0169511	S	2	2	0.0237845	S	2	2	0.00749523	S	2	2	0.0190865	S	4	4	0.0213361	S	2	2	0.0181802	S	0.0300001	4	4	S	10	13	0.208796	S	4	4	0.029238	S	12	15	0.41427	S	9	15
8106	PABPN1	15.3333	S	2	2	0.0282972	S	2	2	0.0240674	S	1	1	0.0231481	S	1	1	0.0137629	S	1	1	0.017917	S	1	1	0.0189611	S	1	1	0.0238932	S	0.0236704	1	1	S	1	1	0.0253743	S	1	1	0.0229507	S	2	2	0.050517	S	3	4
22834	ZNF652	32.5	S	2	2	0.0286052	S	1	1	0.0168827	S	4	4	0.0694265	S	3	3	0.0451361	S	4	4	0.0437357	S	3	3	0.0391828	S	3	3	0.0550685	S	0.0420827	3	3	S	4	7	0.086812	S	4	5	0.0480001	S	4	7	0.0936341	S	4	5
26121	PRPF31	27	S	2	2	0.00713806	S	1	1	0.00485346	S	3	3	0.0192107	S	3	3	0.0189362	S	4	4	0.0349375	S	2	2	0.0110836	S	3	3	0.0324905	S	0.0436755	5	5	S	3	3	0.0322341	S	3	3	0.0228492	S	9	14	0.363036	S	16	28
4800	NFYA	5	S	2	5	0.726927	S	1	4	0.691009	S	1	9	0.958647	S	1	2	0.346394	S	4	8	0.645235	S	1	4	0.743588	S	1	3	0.822952	S	0.776043	3	1	S	1	6	0.646311	S	2	7	0.654691	S	1	6	0.624681	S	1	6
6634	SNRPD3	9	S	1	1	0.0253151	S	2	2	0.0656244	S	2	2	0.0593557	S	2	3	0.0475607	S	2	3	0.0647206	S	1	1	0.0412299	S	2	2	0.0663844	S	0.083272	3	2	S	2	5	0.214007	S	3	6	0.105225	S	2	5	0.163207	S	4	7
112939	NACC1	28	S	1	1	0.00464376	S	1	1	0.0035539	S	2	2	0.0187325	S	2	2	0.0220909	S	2	2	0.0198057	S	1	1	0.0039733	S	1	1	0.00532483	S	0.0124625	2	2	S	6	9	0.401374	S	7	9	0.374983	S	10	11	0.699527	S	13	21
10001	MED6	13.5	S	1	1	0.0180612	S	1	1	0.0157705	S	2	2	0.0345491	S	1	1	0.0145955	S	2	2	0.0279701	S	1	1	0.0190141	S	1	1	0.020094	S	0.015492	1	1	S	2	2	0.0580233	S	2	2	0.0389728	S	1	1	0.0689129	S	2	2
6155	RPL27	6	S	1	1	0.00692565	S	1	1	0.00828942	S	1	1	0.0109507	S	1	1	0.00684388	S	2	2	0.0160918	S	1	1	0.0107047	S	1	1	0.00950401	S	0.00995253	1	1	S	2	2	0.0288855	S	1	1	0.0118316	S	1	1	0.0156672	S	2	2
84897	TBRG1	14	S	1	2	0.144237	S	1	1	0.129718	S	1	3	0.153439	S	1	2	0.0905786	S	1	1	0.136058	S	1	2	0.146522	S	1	2	0.151196	S	0.141619	1	1	S	2	4	0.181534	S	3	4	0.202037	S	3	4	0.183016	S	1	1
3718	JAK3	60.5	S	1	1	0.186791	S	1	1	0.153813	S	1	1	0.185213	S	1	1	0.109918	S	1	1	0.13058	S	1	1	0.164819	S	1	1	0.168929	S	0.151294	1	1	S	1	2	0.251673	S	1	2	0.211862	S	1	2	0.242349	S	1	2
10236	HNRNPR	35.3333	S	6	6	0.0862093	S	9	9	0.14354	S	5	6	0.149228	S	9	11	0.150485	S	9	12	0.134796	S	8	9	0.16042	S	7	10	0.161838	S	0.220112	14	10	S	9	12	0.338242	S	9	10	0.343197	S	10	19	0.634948	S	14	27
8861	LDB1	19.3333	S	8	8	0.182823	S	5	6	0.146406	S	7	7	0.189392	S	5	5	0.087724	S	7	7	0.175685	S	9	9	0.229626	S	6	7	0.202947	S	0.163138	7	6	S	6	8	0.312157	S	8	13	0.332144	S	6	10	0.281614	S	3	7
7026	NR2F2	18	S	14	47	6.44786	S	12	45	5.39001	S	14	45	6.7269	S	12	33	2.28084	S	12	42	7.29744	S	13	48	7.97552	S	12	42	4.93564	S	5.21447	43	13	S	7	12	0.168157	S	6	11	0.168481	S	6	10	0.139941	S	6	7
6045	RNF2	18.5	S	2	4	0.0158085	S	2	4	0.0154423	S	3	4	0.0252196	S	2	3	0.0113175	S	4	6	0.0239754	S	3	5	0.0214632	S	2	4	0.0232909	S	0.0193143	3	2	S	5	7	0.074692	S	5	7	0.128892	S	5	8	0.0909076	S	6	9
3007	HIST1H1D	12	S	20	79	10.9775	S	14	98	11.3095	S	16	68	14.3401	S	21	57	7.27991	S	18	78	15.7602	S	19	77	13.4609	S	19	71	13.2742	S	10.3995	63	17	S	22	70	10.8656	S	25	72	11.78	S	18	54	7.94284	S	16	52
5094	PCBP2	21.4286	S	3	4	0.0823004	S	3	3	0.0756033	S	6	6	0.116542	S	5	9	0.0965624	S	10	12	0.306455	S	2	3	0.0140483	S	4	6	0.0952403	S	0.241853	9	7	S	9	24	0.915658	S	6	9	0.0948628	S	11	50	4.57637	S	16	101
80086	TUBA4B	15	S	2	10	0.431866	S	2	10	1.28612	S	2	9	1.19897	S	2	4	0.157687	S	2	18	2.11588	S	2	15	2.04	S	2	10	0.877902	S	0.746907	10	2	S	2	12	1.15542	S	2	13	1.60739	S	2	14	2.66737	S	2	18
3008	HIST1H1E	12	S	18	69	5.42583	S	13	97	5.19347	S	15	62	4.64424	S	20	51	2.53039	S	18	75	10.9589	S	18	65	5.94133	S	18	65	5.2933	S	4.04235	55	16	S	21	68	6.89346	S	24	67	3.62566	S	18	52	6.86774	S	15	48
7072	TIA1	14.8571	S	10	12	0.145727	S	5	8	0.151769	S	6	8	0.173034	S	4	6	0.0577064	S	7	8	0.0851214	S	6	9	0.192553	S	8	11	0.173672	S	0.140697	8	6	S	6	13	0.100137	S	6	13	0.11693	S	5	11	0.100452	S	5	8
7005	TEAD3	23	S	14	20	0.268333	S	8	11	0.194715	S	17	21	0.315379	S	12	15	0.0944191	S	9	13	0.146088	S	14	17	0.239162	S	15	19	0.224324	S	0.27739	17	14	S	12	20	0.107829	S	12	19	0.073331	S	11	16	0.0222686	S	8	11
10492	SYNCRIP	29.3636	S	5	5	0.0946777	S	5	5	0.0965358	S	5	6	0.155579	S	5	5	0.077565	S	8	9	0.149234	S	6	7	0.110633	S	7	7	0.146079	S	0.177242	9	9	S	6	10	0.190128	S	7	10	0.158125	S	10	13	0.254723	S	9	20
7531	YWHAE	16.6667	S	3	3	0.00795029	S	4	6	0.0596639	S	4	5	0.0387512	S	2	3	0.0085123	S	6	6	0.0631127	S	4	5	0.111312	S	3	4	0.0179223	S	0.0243283	5	4	S	10	15	0.221795	S	4	5	0.0809598	S	7	11	0.187244	S	12	17
10664	CTCF	33.3333	S	12	19	1.17993	S	4	7	0.201435	S	6	9	0.36854	S	3	7	0.242224	S	4	5	0.147935	S	4	10	0.197024	S	4	7	0.168081	S	0.143757	6	4	S	6	11	0.504774	S	6	12	0.329301	S	6	12	0.46913	S	7	12
5518	PPP2R1A	35	S	2	2	0.0236921	S	3	4	0.0222198	S	3	4	0.0410984	S	6	7	0.0918575	S	4	4	0.0324999	S	3	3	0.0317689	S	6	6	0.0559246	S	0.0597001	8	5	S	11	14	0.396683	S	10	13	0.339094	S	16	24	0.741416	S	20	40
7403	KDM6A	73.619	S	24	32	0.582273	S	16	19	0.257219	S	22	28	0.392376	S	24	31	0.50217	S	3	7	0.0101674	S	18	26	0.267024	S	16	21	0.294596	S	0.300166	23	18	S	9	9	0.133582	S	5	6	0.0818936	S	18	20	0.377707	S	12	13
3310	HSPA6	39	S	9	27	1.66194	S	7	30	1.32524	S	10	27	2.96633	S	9	27	1.73818	S	10	22	1.35099	S	10	29	2.01834	S	9	29	2.38851	S	2.06428	30	10	S	9	28	3.16781	S	9	29	2.35232	S	9	31	3.60323	S	10	35
170463	SSBP4	18.2308	S	3	3	0.055124	S	3	4	0.0436933	S	3	3	0.0624287	S	3	3	0.0534627	S	4	4	0.0762301	S	4	5	0.0794862	S	3	4	0.0408103	S	0.0385149	4	3	S	3	3	0.16061	S	3	3	0.0971919	S	2	2	0.0353443	S	2	2
6880	TAF9	20	S	11	13	0.176514	S	8	12	0.20797	S	11	18	0.441178	S	8	10	0.187088	S	11	13	0.290195	S	9	12	0.262612	S	9	13	0.330203	S	0.241395	12	8	S	16	31	1.0704	S	15	24	0.750992	S	12	23	0.851853	S	14	24
3839	KPNA3	24	S	7	11	0.162063	S	4	6	0.107256	S	4	6	0.10218	S	9	11	0.252612	S	6	6	0.116865	S	8	9	0.229305	S	5	9	0.144682	S	0.0684603	5	4	S	10	12	0.412684	S	9	13	0.390141	S	10	15	0.545646	S	7	8
10265	IRX5	26.3333	S	2	2	0.0073795	S	3	4	0.0244522	S	1	1	0.00780287	S	3	3	0.0133528	S	1	1	0.00365471	S	2	2	0.0127802	S	3	3	0.0157146	S	0.00685091	2	2	S	3	3	0.0227524	S	2	2	0.0161726	S	3	3	0.0236144	S	3	3
404281	YY2	17	S	5	20	0.365363	S	4	17	0.268839	S	5	21	0.425649	S	5	15	0.252884	S	4	15	0.433679	S	6	24	0.506922	S	5	20	0.436573	S	0.391225	19	5	S	5	21	0.60452	S	5	21	0.701329	S	4	22	0.774633	S	5	20
1654	DDX3X	26.3333	S	4	5	0.0609774	S	3	3	0.0495197	S	5	5	0.0614401	S	3	3	0.0411996	S	4	4	0.0383549	S	5	5	0.0613768	S	4	4	0.0542249	S	0.0572246	5	4	S	5	10	0.0936943	S	5	8	0.0695215	S	12	21	0.345345	S	19	32
4010	LMX1B	25	S	5	6	0.134175	S	3	3	0.0847616	S	4	5	0.085822	S	4	4	0.0502551	S	6	6	0.124799	S	4	4	0.106507	S	5	5	0.0943419	S	0.0918821	6	5	S	5	5	0.116202	S	7	7	0.132827	S	6	6	0.119541	S	1	1
7528	YY1	22	S	10	27	0.508863	S	6	22	0.336796	S	11	27	0.77847	S	9	19	0.452376	S	10	22	0.525896	S	9	27	0.502745	S	10	27	0.733359	S	0.596135	25	10	S	16	42	1.55055	S	14	42	1.42	S	14	47	1.60645	S	13	32
2101	ESRRA	23	S	6	7	0.104757	S	3	4	0.0579475	S	2	3	0.0289079	S	3	3	0.0252361	S	3	3	0.0348356	S	4	5	0.052368	S	3	4	0.0446022	S	0.0421347	4	3	S	5	6	0.174199	S	7	9	0.201796	S	6	7	0.198703	S	5	6
3850	KRT3	39	S	12	22	0.4309	S	6	13	0.0242278	S	13	31	0.638093	S	8	13	0.0478676	S	5	8	0.0766002	S	8	15	0.182465	S	8	14	0.267686	S	0.284878	16	10	S	8	16	1.06571	S	6	13	0.667485	S	9	17	1.02715	S	8	15
8841	HDAC3	22	S	6	11	0.0644494	S	4	6	0.0440262	S	6	11	0.0605659	S	6	10	0.0411839	S	6	12	0.0585683	S	6	9	0.0609571	S	6	11	0.0568453	S	0.0374666	9	5	S	4	10	0.0787107	S	5	12	0.0790417	S	6	15	0.142859	S	7	13
7702	ZNF143	16.8889	S	3	3	0.265012	S	3	3	0.0243954	S	5	5	0.431136	S	4	4	0.0309389	S	4	4	0.0531555	S	3	3	0.0320039	S	5	5	0.387148	S	0.0389972	3	3	S	4	4	0.0562507	S	2	2	0.0114252	S	5	6	0.115836	S	4	5
7004	TEAD4	17	S	10	15	0.0891095	S	5	7	0.102616	S	12	15	0.0687837	S	9	12	0.0106388	S	9	12	0.133786	S	9	11	0.127216	S	12	15	0.0862014	S	0.0553364	10	9	S	13	23	0.325632	S	13	22	0.338054	S	14	22	0.415799	S	11	19
4784	NFIX	22.3333	S	4	7	0.0186303	S	6	9	0.0394714	S	7	11	0.0563552	S	5	7	0.012425	S	5	12	0.639051	S	5	13	0.0690969	S	6	12	0.0335743	S	0.0105904	8	4	S	12	23	1.01149	S	12	26	0.942964	S	11	21	0.733313	S	11	21
7532	YWHAG	18	S	4	5	0.0588982	S	3	4	0.0512066	S	4	5	0.0620604	S	3	4	0.0234042	S	4	4	0.05718	S	4	5	0.125246	S	5	6	0.0657062	S	0.0554462	6	5	S	5	10	0.0868809	S	4	5	0.0496874	S	6	10	0.090307	S	6	11
10382	TUBB4A	25	S	18	76	0.411459	S	15	79	0.301653	S	19	79	0.694564	S	16	72	0.103625	S	17	83	0.825708	S	16	84	0.468372	S	18	76	0.365142	S	0.372766	89	19	S	20	102	1.23611	S	20	94	1.08229	S	24	142	2.56771	S	26	159
147807	ZNF524	17	S	2	2	0.077732	S	1	1	0.0503492	S	2	3	0.0967541	S	1	2	0.0293395	S	2	2	0.0752371	S	3	3	0.0931837	S	1	2	0.0651297	S	0.0714201	2	2	S	1	1	0.0771102	S	2	2	0.0701104	S	2	2	0.0933494	S	3	4
2597	GAPDH	19	S	3	4	0.042972	S	1	1	0.00877748	S	7	10	0.425431	S	1	1	0.00514767	S	2	2	0.0241501	S	1	1	0.00539096	S	1	1	0.0109718	S	0.0134306	2	2	S	8	14	0.620423	S	3	4	0.133582	S	1	1	0.015668	S	3	4
51003	MED31	9	S	4	5	0.0494653	S	5	7	0.0837626	S	5	9	0.149121	S	5	5	0.0394681	S	5	7	0.106759	S	5	6	0.0666289	S	5	7	0.0674321	S	0.0713733	7	5	S	3	5	0.120579	S	2	4	0.0538423	S	2	4	0.109057	S	4	5
26122	EPC2	45.6667	S	13	14	0.15866	S	10	11	0.097454	S	10	13	0.101571	S	12	15	0.141236	S	1	1	0.00309068	S	9	11	0.0659697	S	10	11	0.0923736	S	0.201227	18	14	S	8	9	0.0867548	S	6	6	0.0421796	S	8	12	0.14605	S	7	8
7589	ZSCAN21	33.5	S	10	14	0.516593	S	5	8	0.588067	S	10	18	0.768826	S	10	16	0.55814	S	8	13	0.365476	S	12	19	0.461216	S	12	20	0.925459	S	0.712014	18	12	S	5	6	0.0882387	S	5	6	0.10389	S	5	7	0.106089	S	2	2
27086	FOXP1	29.3333	S	9	15	0.272676	S	7	8	0.187969	S	9	14	0.467789	S	10	15	0.306846	S	6	7	0.136242	S	8	11	0.213799	S	11	16	0.485627	S	0.389852	16	12	S	6	10	0.263317	S	6	8	0.151242	S	6	8	0.216305	S	5	6
4149	MAX	8.11111	S	3	3	0.0658969	S	2	3	0.0346701	S	2	3	0.0597958	S	2	2	0.0368498	S	3	3	0.03812	S	1	1	0.0255691	S	2	2	0.0506572	S	0.0452608	2	2	S	2	2	0.0482847	S	2	2	0.034652	S	2	2	0.0388856	R	1	1
9923	ZBTB40	60.3333	S	15	17	0.215445	S	13	15	0.142982	S	7	9	0.0830251	S	8	9	0.076596	S	2	2	0.0178082	S	12	14	0.124064	S	10	11	0.0849068	S	0.145563	15	13	S	3	3	0.0255079	S	1	1	0.0143379	S	5	5	0.0479762	S	5	5
4335	MNT	20.6667	S	3	3	0.0345544	S	2	2	0.0216128	S	3	3	0.0472085	S	3	3	0.0294277	S	2	2	0.0176189	S	3	3	0.0271511	S	4	4	0.0410701	S	0.0335128	3	3	S	4	6	0.0520957	S	3	5	0.041135	S	4	5	0.0524517	S	1	1
9184	BUB3	9	S	2	2	0.00854118	S	2	2	0.00663429	S	2	2	0.0117196	S	1	1	0.00372308	S	2	2	0.00936831	S	1	1	0.00261277	S	1	1	0.00436067	S	0.00997578	3	3	S	4	4	0.0489475	S	3	4	0.0190892	S	5	5	0.0458973	S	7	8
57684	ZBTB26	27	S	7	7	0.161324	S	6	6	0.177906	S	5	5	0.128208	S	5	5	0.0604061	S	6	6	0.145832	S	7	7	0.188749	S	6	6	0.126573	S	0.113555	6	6	S	2	2	0.0170915	S	3	3	0.0259255	S	3	3	0.0216027	A	1	1
64864	RFX7	71.3333	S	4	4	0.0403667	S	3	3	0.0157063	S	6	6	0.0444686	S	4	4	0.041279	S	1	1	0.00775048	S	4	4	0.0283858	S	7	7	0.0471953	S	0.05105	5	5	S	4	4	0.0366661	S	1	1	0.0102235	S	4	4	0.0444111	S	2	2
8629	JRK	34	S	6	6	0.0746568	S	3	3	0.0416704	S	2	2	0.0157019	S	8	9	0.0690713	S	5	5	0.0395567	S	6	7	0.052696	S	5	6	0.054803	S	0.0460354	6	6	S	7	7	0.0725145	S	7	7	0.0680645	S	4	4	0.0276547	S	1	1
2969	GTF2I	56.1667	S	24	26	0.683643	S	19	21	0.293545	S	23	27	0.471381	S	34	49	1.37997	S	11	16	0.173482	S	16	18	0.294635	S	15	16	0.291383	S	2.20648	61	37	S	20	26	0.558909	S	6	6	0.0516005	S	44	81	4.69954	S	68	182
79968	WDR76	35	S	5	6	0.0957375	S	6	8	0.134035	S	8	10	0.191665	S	7	8	0.124937	S	6	6	0.13073	S	5	6	0.0963988	S	6	7	0.176838	S	0.161607	9	7	S	5	6	0.0607484	S	4	5	0.0459867	S	5	5	0.0731184	S	2	3
55892	MYNN	31.25	S	4	6	0.120038	S	6	10	0.153388	S	6	9	0.223534	S	4	5	0.095563	S	7	10	0.19842	S	6	9	0.208948	S	5	8	0.229794	S	0.107054	6	5	S	3	5	0.0624489	S	3	5	0.0341768	S	4	5	0.0447901	S	3	3
140735	DYNLL2	5	S	4	5	0.0522932	S	3	3	0.0354789	S	5	6	0.0992913	S	3	4	0.0294555	S	3	5	0.076231	S	5	6	0.0666482	S	5	5	0.043605	S	0.0525122	5	4	S	3	6	0.337097	S	3	4	0.108431	S	3	6	0.16403	S	2	4
9775	EIF4A3	24.5	S	4	5	0.041657	S	3	3	0.0222136	S	4	4	0.0442845	S	2	2	0.0269674	S	4	4	0.0333825	S	6	6	0.0553706	S	3	3	0.0347622	S	0.0312791	4	3	S	4	5	0.046061	S	4	4	0.0572535	S	8	10	0.104691	S	13	18
2521	FUS	18.6667	S	5	7	0.317512	S	5	7	0.266375	S	8	14	0.569438	S	8	13	0.330804	S	7	8	0.262557	S	7	10	0.302229	S	8	11	0.447246	S	0.447207	12	9	S	4	5	0.0912563	S	2	3	0.0595613	S	4	6	0.152509	S	3	6
387032	ZKSCAN4	32.4	S	4	6	0.109733	S	3	4	0.0853538	S	9	11	0.175802	S	6	8	0.113201	S	8	9	0.146424	S	7	9	0.154997	S	6	8	0.155857	S	0.128415	8	7	S	3	3	0.0240202	S	4	4	0.0427073	S	4	4	0.0289635	S	4	4
55167	MSL2	28.5	S	3	4	0.0470812	S	5	5	0.0508115	S	8	9	0.15554	S	6	6	0.0674239	S	7	7	0.0719807	S	6	6	0.0698507	S	7	8	0.143024	S	0.125159	9	8	S	5	8	0.192011	S	4	6	0.144133	S	6	9	0.212772	S	7	8
10743	RAI1	106.5	S	12	13	0.250426	S	8	11	0.152062	S	12	17	0.240364	S	12	14	0.191849	S	2	2	0.0211948	S	9	12	0.105867	S	11	14	0.174701	S	0.161928	12	11	S	6	7	0.10152	S	4	5	0.0394021	S	5	6	0.077926	S	6	6
2079	ERH	7	S	1	1	0.059048	S	1	1	0.0441931	S	2	2	0.101013	S	1	1	0.024548	S	2	3	0.0983835	S	1	1	0.0505706	S	1	1	0.0452723	S	0.0527112	1	1	S	3	3	0.294772	S	2	2	0.159081	S	1	1	0.15066	S	2	2
9612	NCOR2	158	S	33	36	0.624957	S	15	15	0.242127	S	29	32	0.433455	S	25	27	0.385922	S	2	2	0.0225361	S	21	21	0.203903	S	26	29	0.347572	S	0.409366	26	23	S	8	8	0.0870515	S	7	7	0.0639914	S	9	10	0.12145	S	10	10
283254	HARBI1	20	S	3	3	0.027776	S	1	1	0.0108214	S	3	3	0.0321116	S	2	2	0.00965406	S	3	3	0.0178537	S	3	3	0.0241	S	4	4	0.0313649	S	0.0277694	4	4	S	4	5	0.0572189	S	1	3	0.0168043	S	1	2	0.0244383	S	2	3
84878	ZBTB45	24	S	6	9	0.266855	S	6	11	0.443123	S	7	11	0.57472	S	7	14	0.423382	S	6	10	0.374247	S	7	10	0.43178	S	6	12	0.593357	S	0.511892	14	7	S	2	3	0.0434895	S	2	5	0.0593385	S	2	3	0.0676287	R	2	2
6668	SP2	31.6667	S	4	9	0.176478	S	5	9	0.209858	S	6	12	0.479481	S	5	10	0.177979	S	7	12	0.275454	S	8	12	0.310716	S	8	13	0.486172	S	0.3568	14	8	S	6	7	0.24709	S	3	4	0.164681	S	6	8	0.348256	S	4	5
8930	MBD4	37	S	6	6	0.0412299	S	5	5	0.042122	S	10	11	0.110198	S	8	8	0.0518882	S	3	3	0.0150732	S	7	8	0.0485169	S	9	10	0.0978495	S	0.0526466	6	5	S	2	2	0.00913793	S	1	1	0.00337518	S	2	3	0.0236611	R	1	1
2963	GTF2F2	14.6	S	1	1	0.0249549	S	1	1	0.015526	S	1	1	0.0185343	S	1	1	0.0160458	S	1	1	0.0217384	S	1	1	0.0213588	S	1	1	0.0210556	S	0.0170417	1	1	S	2	2	0.0383993	S	1	1	0.015836	S	1	1	0.0223713	S	1	1
302	ANXA2	22.3333	S	8	8	0.0612831	S	4	4	0.03804	S	9	10	0.141865	S	2	2	0.00877502	S	7	7	0.0664735	S	4	4	0.0349618	S	4	4	0.0219481	S	0.0516668	7	7	S	12	16	0.436602	S	14	21	0.436188	S	15	20	0.598046	S	18	27
6152	RPL24	8	S	3	3	0.0384458	S	3	3	0.0382486	S	2	2	0.0232206	S	2	2	0.0116563	S	3	3	0.0395462	S	2	2	0.0198267	S	1	1	0.00694232	S	0.0459355	3	3	S	4	5	0.105629	S	4	5	0.0732058	S	3	4	0.0920173	S	2	2
2005	ELK4	19.5	S	4	5	0.0714321	S	3	4	0.0479484	S	3	3	0.0660318	S	3	3	0.0582716	S	3	3	0.0614469	S	2	2	0.0594133	S	2	2	0.0686272	S	0.0549097	2	2	S	1	1	0.0563981	S	4	4	0.085834	S	2	2	0.0727887	S	1	1
6428	SRSF3	9	S	2	2	0.0971013	S	2	2	0.0702939	S	3	3	0.123236	S	2	2	0.0581206	S	3	3	0.115712	S	3	3	0.138804	R	2	2	0.100308	S	0.111848	2	2	S	4	5	0.283697	S	3	5	0.208672	S	5	5	0.240887	S	5	7
51804	SIX4	30	S	9	11	0.26069	S	4	5	0.0955866	S	5	7	0.140767	S	5	5	0.0695841	S	3	7	0.097458	S	7	9	0.120396	S	6	8	0.131431	S	0.138224	10	6	S	7	10	0.233678	S	7	13	0.221951	S	6	11	0.327866	S	7	10
221527	ZBTB12	29	S	5	5	0.0936981	S	3	3	0.0533134	S	5	5	0.0970344	S	3	3	0.0237673	S	3	3	0.04051	S	4	4	0.0716298	S	5	5	0.086841	S	0.0496035	3	3	S	5	5	0.119345	S	6	8	0.170509	S	5	7	0.142295	S	3	3
93624	TADA2B	18.5	S	5	7	0.0802627	S	2	3	0.0639993	S	4	7	0.115537	S	5	8	0.0410009	S	3	4	0.0573204	S	4	5	0.0711822	S	5	8	0.0807828	S	0.0456127	4	3	S	6	9	0.177055	S	8	11	0.220716	S	6	9	0.229042	S	6	8
286826	LIN9	28.8333	S	4	4	0.0681698	S	6	6	0.113502	S	7	7	0.122123	S	5	5	0.072137	S	4	4	0.06841	S	5	5	0.102182	S	9	9	0.192929	S	0.156448	9	8	S	8	9	0.169078	S	10	11	0.233499	S	9	13	0.254814	S	8	8
6881	TAF10	10	S	3	3	0.14599	S	2	2	0.0883003	S	4	4	0.24023	S	2	2	0.0603772	S	3	5	0.144606	S	2	2	0.138475	S	3	3	0.21579	S	0.19172	4	4	S	5	6	0.518907	S	4	5	0.252597	S	5	6	0.416763	S	5	5
7518	XRCC4	12.3333	S	3	3	0.0258217	S	2	2	0.0123361	S	2	2	0.01732	S	1	1	0.00504144	S	3	4	0.0286132	S	4	4	0.0381169	S	2	2	0.0146246	S	0.0179849	3	3	S	11	19	0.917062	S	11	19	0.938876	S	11	17	0.959897	S	7	13
55090	MED9	9	S	1	1	0.030367	S	2	2	0.0345213	S	2	4	0.065428	S	1	1	0.0196081	S	3	3	0.0472676	S	3	3	0.0511068	S	2	2	0.0303136	S	0.0268457	1	1	S	2	3	0.0669988	S	1	1	0.0108316	S	1	2	0.056253	S	2	2
3201	HOXA4	18	S	3	3	0.0618148	S	2	2	0.0430786	S	3	3	0.0826239	S	2	2	0.0324703	S	3	3	0.058046	S	2	2	0.0326908	S	3	3	0.073418	S	0.0569621	3	3	S	2	2	0.0666466	S	2	2	0.0539547	S	1	1	0.0519183	S	1	1
2091	FBL	22.3333	S	3	4	0.0291587	S	1	2	0.0107928	S	1	2	0.0167114	S	2	2	0.00887878	S	2	2	0.0160925	S	2	3	0.0302478	S	2	3	0.0251407	S	0.0303211	3	2	S	9	13	0.761867	S	9	13	0.582905	S	9	12	0.543274	S	8	11
9880	ZBTB39	41	S	1	1	0.0146341	S	1	1	0.00965754	S	2	2	0.0359724	S	2	2	0.0275691	S	2	2	0.016013	S	1	1	0.007279	S	3	3	0.0424774	S	0.0362533	2	2	S	3	4	0.0630643	S	2	3	0.0431353	S	2	2	0.0234677	S	1	2
51058	ZNF691	23.25	S	2	2	0.017773	S	1	1	0.0102321	S	2	2	0.0203681	S	1	1	0.00468934	S	2	2	0.0177331	S	2	2	0.0157977	S	2	2	0.0145788	S	0.0120273	2	2	S	2	2	0.0312145	S	2	2	0.0232754	S	2	2	0.0254881	S	1	1
6627	SNRPA1	15	S	2	2	0.00973067	S	1	1	0.00507678	S	1	1	0.00433426	S	1	1	0.00342987	S	1	1	0.00466243	S	2	2	0.0102686	S	2	2	0.0103257	S	0.0128415	3	3	S	3	3	0.0294399	S	1	1	0.00699025	S	2	2	0.0188123	S	5	5
9533	POLR1C	18.3333	S	3	3	0.0260594	S	3	3	0.0198264	S	7	7	0.151501	R	1	1	0.00498396	S	4	4	0.0243576	S	5	5	0.0320537	S	4	4	0.0258506	S	0.0266651	4	4	S	14	33	3.06165	S	17	39	3.34336	S	15	30	3.64077	S	14	35
57117	INTS12	28	S	1	2	0.0201235	S	1	1	0.0224507	S	1	1	0.0284987	R	1	1	0.0215045	S	1	1	0.0209013	S	1	1	0.0255231	S	1	1	0.0302282	S	0.0371923	2	2	S	2	4	0.227054	S	4	6	0.145164	S	5	7	0.434973	S	7	13
85416	ZIC5	24	S	1	2	0.025019	S	1	2	0.0406398	S	1	2	0.0468647	R	1	1	0.0038309	S	1	2	0.0359137	S	1	2	0.0317771	S	3	4	0.0476654	S	0.0383447	3	2	S	1	2	0.0304387	S	1	1	0.0185548	S	1	2	0.0339341	S	1	2
113246	C12orf57	5.75	S	2	3	0.0118762	S	2	2	0.0122671	S	2	2	0.0208193	R	2	2	0.00756614	S	2	2	0.0203638	S	2	2	0.0166431	S	2	2	0.0165189	R	0.0187844	2	2	S	3	4	0.0453318	S	1	1	0.00636935	S	3	5	0.0536635	S	4	5
3608	ILF2	20	S	3	3	0.0416433	S	3	3	0.029481	S	4	4	0.0746916	A	2	2	0.00500038	S	6	6	0.0632851	S	4	5	0.0538369	S	4	4	0.0540189	S	0.0427985	3	3	S	6	6	0.161612	S	3	3	0.0666801	S	7	10	0.327037	S	12	18
27339	PRPF19	26	S	6	6	0.0513349	S	4	4	0.0412403	S	4	4	0.0441465	S	5	5	0.0279403	S	6	6	0.0638517	S	3	3	0.0280689	S	5	6	0.0799872	S	0.0910171	8	7	S	8	11	0.331433	S	7	9	0.278377	S	8	12	0.384895	S	10	16
64769	MEAF6	10	S	3	3	0.0327675	S	2	2	0.0246708	S	4	4	0.0597279	S	2	2	0.0133235	S	5	6	0.0598747	S	2	2	0.014951	S	2	2	0.0191065	S	0.0375213	4	4	S	5	6	0.162243	S	4	5	0.0718461	S	5	7	0.142334	S	4	4
4089	SMAD4	26	S	4	4	0.0896356	S	3	3	0.10407	S	3	3	0.118931	S	3	3	0.055675	S	3	3	0.0846784	S	3	3	0.0980028	S	7	7	0.209595	S	0.160333	6	5	S	2	2	0.0597782	S	5	5	0.0975835	S	4	4	0.0995728	S	1	1
8464	SUPT3H	13.5556	S	3	4	0.0861661	S	3	3	0.0551859	S	3	4	0.056272	S	3	3	0.0361619	S	4	4	0.0670976	S	3	4	0.0470828	S	4	6	0.0981163	S	0.0452758	4	3	S	3	6	0.0900617	S	3	6	0.0866493	S	4	8	0.201956	S	4	5
29127	RACGAP1	37	S	1	1	0.00562972	S	1	1	0.00412607	S	2	2	0.0141949	S	3	3	0.0127111	S	4	4	0.0225315	S	3	3	0.00904642	S	2	2	0.0111143	S	0.0214913	3	3	S	8	12	0.106323	S	3	3	0.00612959	S	12	20	0.563059	S	11	20
117159	DCD	7.5	S	2	2	0.0317192	S	2	2	0.0165263	S	4	5	0.0704712	S	3	3	0.0126993	S	2	2	0.0275623	S	3	3	0.010672	R	1	1	0.00576499	R	0.00596235	1	1	S	2	3	0.044041	S	1	2	0.0123531	S	1	2	0.00730243	R	1	1
3516	RBPJ	19.2857	S	2	2	0.0249417	S	1	1	0.0174868	S	1	1	0.024837	S	1	1	0.0195631	S	1	1	0.00580033	R	1	1	0.0208228	S	2	2	0.0296554	S	0.0251739	2	2	S	2	2	0.0143488	S	1	1	0.00397588	S	1	1	0.00927516	S	2	2
6500	SKP1	11.5	S	4	4	0.114408	S	3	3	0.0804359	S	6	6	0.19618	S	2	2	0.0291934	S	4	4	0.135913	R	1	1	0.0361248	A	1	1	0.00745285	S	0.0480835	2	2	S	3	4	0.228013	S	1	1	0.0465447	S	3	3	0.100736	S	5	6
29994	BAZ2B	116.875	S	41	50	0.921605	S	20	23	0.318493	S	41	49	0.701138	S	32	37	0.511132	S	6	6	0.0706393	S	25	29	0.328429	S	31	34	0.416783	S	0.4872	30	28	S	16	18	0.286955	S	12	12	0.181748	S	18	20	0.300626	S	13	14
25942	SIN3A	73	S	26	34	0.633468	S	19	22	0.241191	S	23	24	0.327098	S	23	25	0.378339	S	2	3	0.0107036	S	21	22	0.231263	S	22	24	0.265384	S	0.466981	33	29	S	7	8	0.113386	S	7	8	0.0746706	S	10	12	0.184189	S	11	16
57680	CHD8	139.5	S	26	31	0.606867	S	16	19	0.303685	S	32	37	0.63931	S	28	37	0.64933	S	4	4	0.0152668	S	21	24	0.277377	S	22	26	0.375086	S	0.60216	37	29	S	47	73	3.01531	S	47	64	2.01578	S	54	77	3.99697	S	56	79
9968	MED12	125	S	25	30	0.324327	S	9	12	0.087021	S	29	36	0.471971	S	22	26	0.293703	S	2	3	0.0196088	S	16	18	0.100978	S	17	21	0.126894	S	0.203112	22	18	S	21	23	0.405626	S	15	15	0.207856	S	34	39	1.16085	S	28	30
26173	INTS1	120.8	S	24	26	0.358482	S	15	16	0.1854	S	16	17	0.232223	S	23	25	0.30719	S	3	4	0.0170016	S	18	18	0.143867	S	16	18	0.233762	S	0.302563	24	22	S	42	54	1.3778	S	35	42	0.829199	S	50	73	2.65472	S	51	87
49854	ZBTB21	61.5	S	21	27	0.766159	S	16	21	0.370215	S	17	20	0.427951	S	15	20	0.432033	S	2	3	0.0519834	S	14	18	0.279202	S	17	21	0.360094	S	0.322213	19	15	S	14	14	0.380124	S	10	11	0.262688	S	14	15	0.460188	S	9	10
7764	ZNF217	69.5	S	15	17	0.156439	S	10	11	0.0960874	S	13	14	0.0934849	S	12	14	0.106268	S	1	3	0.0103925	S	8	8	0.052825	S	7	8	0.0560068	S	0.140863	11	10	S	11	12	0.246281	S	7	9	0.158391	S	13	15	0.33521	S	11	16
23054	NCOA6	74.9412	S	14	19	0.570697	S	12	13	0.278699	S	15	20	0.573284	S	11	14	0.440987	S	1	1	0.0098728	S	10	13	0.238226	S	10	12	0.293814	S	0.295458	13	12	S	11	13	0.281662	S	7	8	0.117371	S	15	19	0.561199	S	10	13
57592	ZNF687	65	S	12	20	0.56537	S	10	12	0.251167	S	13	18	0.373767	S	11	12	0.370136	S	3	3	0.0476173	S	13	17	0.319371	S	11	16	0.282014	S	0.397724	15	11	S	14	26	0.561847	S	13	19	0.364835	S	14	25	0.700075	S	14	26
22976	PAXIP1	52	S	12	17	0.330268	S	7	9	0.126511	S	12	15	0.302924	S	10	14	0.256201	S	4	4	0.0301233	S	11	13	0.189877	S	9	11	0.143398	S	0.199329	11	8	S	9	12	0.224109	S	6	7	0.115197	S	13	17	0.495376	S	10	15
9330	GTF3C3	33.6667	S	12	15	0.184255	S	5	7	0.0705599	S	5	7	0.0727479	S	8	11	0.108419	S	1	1	0.00331706	S	5	7	0.0697312	S	7	9	0.0572439	S	0.16057	13	10	S	16	21	0.455368	S	7	9	0.148529	S	23	30	0.971714	S	25	42
23051	ZHX3	47	S	10	11	0.223603	S	6	6	0.100399	S	11	12	0.100153	S	10	11	0.0801206	S	1	2	0.0343599	S	6	7	0.0768406	S	5	5	0.054229	S	0.0464645	6	5	S	19	28	0.842388	S	14	20	0.545823	S	16	22	0.735964	S	14	16
2976	GTF3C2	45.6667	S	10	12	0.220292	S	4	6	0.0886665	S	6	6	0.103017	S	8	8	0.122011	S	1	1	0.0125436	S	5	5	0.0562477	S	5	5	0.0218434	S	0.180704	10	10	S	8	13	0.47251	S	4	4	0.0559923	S	13	20	0.884864	S	16	28
8535	CBX4	35.5	S	7	7	0.0807103	S	4	4	0.0274061	S	5	5	0.0992927	S	5	5	0.0654827	S	2	2	0.0176305	S	4	4	0.0337493	S	7	7	0.0590593	S	0.0493625	5	5	S	6	8	0.0626061	S	5	8	0.104841	S	6	8	0.147027	S	7	10
9969	MED13	95.25	S	6	6	0.0496407	S	6	6	0.0374028	S	9	10	0.120191	S	8	9	0.107558	S	1	1	0.000635939	S	5	5	0.046488	S	5	6	0.0357904	S	0.0469875	5	5	S	7	7	0.139213	S	6	6	0.101691	S	13	14	0.344658	S	11	12
84916	UTP4	36	S	4	4	0.0295331	S	3	3	0.0247045	S	3	3	0.0311934	S	5	5	0.0338396	S	2	2	0.0131575	S	3	3	0.0265924	S	6	6	0.0567366	S	0.0536825	6	6	S	14	35	0.920109	S	14	28	0.673255	S	14	30	1.02441	S	16	29
1785	DNM2	60	S	13	13	0.129579	S	13	13	0.105626	S	11	11	0.0824281	S	9	11	0.119904	S	3	3	0.0132317	S	12	13	0.0839781	S	8	9	0.0771055	S	0.183107	17	14	S	10	12	0.150215	S	8	9	0.1088	S	23	29	0.815883	S	38	64
10902	BRD8	49.3913	S	6	6	0.0761092	S	6	6	0.0657004	S	4	4	0.0292728	S	3	3	0.0268499	S	1	1	0.00170284	S	4	4	0.012737	S	4	4	0.0137308	S	0.0478635	6	5	S	6	7	0.110261	S	3	3	0.0240693	S	9	11	0.278715	S	11	16
146050	ZSCAN29	37.5	S	9	11	0.112257	S	2	3	0.0442506	S	7	8	0.0764187	S	6	6	0.0566037	S	1	1	0.00560189	S	3	4	0.0366751	S	5	6	0.0507349	S	0.00797539	1	1	S	4	6	0.077428	S	3	5	0.0586659	S	5	5	0.0728108	R	1	1
84437	MSANTD4	17	S	2	2	0.0316216	S	3	3	0.0418274	S	4	4	0.0680858	S	2	2	0.0148616	S	6	6	0.0864789	S	6	6	0.0814234	S	4	4	0.0528591	S	0.0439162	4	4	S	6	6	0.160164	S	7	7	0.162194	S	5	5	0.149001	S	2	2
23269	MGA	161.286	S	7	7	0.0406711	S	5	5	0.018703	S	8	8	0.0483037	S	5	5	0.039604	S	1	1	0.00123641	S	3	3	0.0138668	S	7	7	0.0364557	S	0.0300075	4	4	S	3	3	0.0406292	S	3	3	0.0264941	S	4	4	0.0758933	S	3	3
2000	ELF4	21	S	5	11	0.205111	S	5	8	0.174033	S	4	6	0.192199	S	5	8	0.149711	S	4	5	0.104163	S	6	10	0.183955	S	7	10	0.356185	S	0.268156	8	5	S	4	8	0.0823344	S	4	6	0.0507975	S	4	6	0.0652921	S	3	3
11335	CBX3	9	S	4	9	0.168816	S	2	6	0.14434	S	4	7	0.180357	S	5	8	0.095362	S	4	11	0.211403	S	3	9	0.201217	S	2	5	0.142351	S	0.0782067	6	4	S	5	11	0.484315	S	5	8	0.224553	S	4	8	0.377195	S	6	12
6498	SKIL	41	S	3	3	0.0273986	S	5	5	0.0346586	S	4	5	0.0502346	S	6	6	0.0379705	S	2	2	0.00889839	S	3	3	0.0232654	S	7	9	0.0753301	S	0.0514357	7	7	S	2	2	0.029324	S	2	3	0.0304501	S	3	3	0.0164463	S	1	1
11143	KAT7	28.7143	S	3	3	0.0426611	S	4	4	0.0432076	S	6	6	0.0507825	S	6	7	0.0506758	S	4	4	0.0446224	S	4	4	0.0515808	S	5	5	0.0703679	S	0.0562161	4	4	S	4	7	0.144224	S	5	8	0.1131	S	7	12	0.23726	S	9	17
1106	CHD2	63	S	14	15	0.136151	S	7	8	0.0496411	S	10	12	0.0896626	S	12	15	0.113697	S	2	2	0.00430744	S	8	8	0.0394664	S	9	12	0.0717152	S	0.0760185	11	8	S	7	10	0.0277033	S	11	14	0.0439482	S	10	13	0.0386695	S	8	12
91151	TIGD7	38	S	1	2	0.0107477	S	2	2	0.021281	S	1	1	0.00742842	S	1	1	0.00594583	S	3	3	0.0178682	R	2	2	0.00671747	S	1	1	0.00724546	S	0.0231775	4	3	S	2	2	0.0566338	S	5	5	0.0634545	S	1	1	0.0278852	R	1	1
55726	INTS13	43.8182	S	6	6	0.0499698	S	5	5	0.0317674	S	8	8	0.0802206	S	8	8	0.0627649	R	2	2	0.0139187	S	3	3	0.0121087	S	8	8	0.0862259	S	0.0958791	9	8	S	10	18	0.351415	S	12	17	0.213976	S	16	26	0.543324	S	11	19
55636	CHD7	131.5	S	31	35	0.415718	S	15	19	0.12237	S	29	32	0.239227	S	19	24	0.156177	R	4	4	0.0288837	S	19	21	0.110201	S	19	23	0.164454	S	0.211486	35	28	S	27	34	0.311053	S	23	28	0.174347	S	28	35	0.36361	S	20	25
57479	PRR12	90	S	17	19	0.415885	S	6	7	0.111663	S	13	15	0.218293	S	11	14	0.215418	R	2	2	0.0189311	S	11	11	0.128214	S	9	11	0.125325	S	0.195708	13	10	S	19	22	0.729811	S	12	13	0.406525	S	20	22	0.941861	S	19	20
55183	RIF1	134.571	S	14	16	0.180231	S	14	14	0.107281	S	14	16	0.121101	S	20	22	0.239248	R	4	5	0.0538446	S	8	8	0.0396523	S	13	13	0.0824217	S	0.418426	27	23	S	26	31	0.736703	S	12	12	0.134783	S	35	52	2.31198	S	44	78
63977	PRDM15	72.2	S	12	14	0.196155	S	10	10	0.140932	S	11	13	0.13529	S	12	13	0.147214	R	2	2	0.0165025	S	10	13	0.0775515	S	6	8	0.0667616	S	0.149173	16	12	S	3	3	0.0445378	S	3	3	0.0348263	S	3	3	0.0477104	S	4	4
51586	MED15	21.375	S	8	10	0.182745	S	5	6	0.106198	S	5	6	0.167631	S	8	13	0.229121	R	2	3	0.00881791	S	7	10	0.147136	S	6	7	0.115348	S	0.143082	7	6	S	7	10	0.23515	S	6	8	0.106387	S	6	12	0.448981	S	6	8
2648	KAT2A	19.25	S	8	8	0.0779469	S	5	5	0.0341858	S	5	5	0.0375427	S	8	9	0.0557095	R	2	2	0.0171855	S	5	5	0.0305198	S	5	5	0.0298367	S	0.0387235	6	6	S	12	14	0.415398	S	9	12	0.266922	S	9	12	0.439084	S	8	10
55683	KANSL3	48.9444	S	3	3	0.0270165	S	3	3	0.0183708	S	2	2	0.0139142	S	3	3	0.017434	R	1	1	0.00273725	S	4	4	0.0180113	S	5	5	0.0218937	S	0.0319796	4	4	S	6	8	0.112999	S	4	5	0.0598453	S	7	9	0.182036	S	4	6
6597	SMARCA4	61.8182	S	13	14	0.097427	S	14	14	0.11359	S	12	13	0.11689	S	13	15	0.132947	R	1	2	0.00860506	S	8	8	0.0693332	S	9	9	0.0977033	S	0.139097	12	11	S	10	11	0.130123	S	4	4	0.0282	S	14	17	0.36916	S	26	39
3096	HIVEP1	117.8	S	14	14	0.119402	S	5	5	0.0354517	S	15	15	0.107981	S	12	12	0.0876343	R	1	1	0.00177444	S	6	6	0.0339339	S	10	10	0.0580897	S	0.0802688	11	11	S	2	2	0.0166008	S	5	5	0.0331406	S	3	3	0.0418095	S	2	2
9817	KEAP1	41	S	4	4	0.0509804	S	3	3	0.0325035	S	5	5	0.0660411	S	4	4	0.043845	R	1	1	0.00451258	S	4	4	0.0204941	S	7	8	0.0877566	S	0.0620331	6	6	S	2	2	0.0283156	S	2	2	0.0264514	S	3	3	0.0528674	S	2	2
6310	ATXN1	26	S	14	19	0.404923	S	8	10	0.175693	S	12	15	0.214498	S	12	14	0.249159	R	1	1	0.00282257	S	11	15	0.173317	S	9	12	0.146302	S	0.248924	13	10	S	5	5	0.135202	S	4	4	0.0650929	S	5	5	0.121902	R	3	3
7486	WRN	82	S	8	8	0.0457935	S	2	2	0.00958194	S	4	4	0.0144643	S	6	6	0.023612	R	1	1	0.00548633	S	2	2	0.00727298	S	3	3	0.0102819	S	0.0200409	6	6	S	25	34	0.775556	S	24	32	0.529179	S	23	32	0.802496	S	21	24
9611	NCOR1	128.053	S	21	27	0.265243	S	10	10	0.092978	S	16	17	0.162118	S	12	12	0.117578	R	1	2	0.00144424	S	7	7	0.0473243	S	16	17	0.127486	S	0.098096	11	10	S	22	27	0.418145	S	16	18	0.256449	S	23	28	0.643287	S	25	31
5436	POLR2G	10	S	2	2	0.0231587	S	2	3	0.0318321	S	3	3	0.0504964	S	1	1	0.00925208	R	1	1	0.0150658	R	1	1	0.0162921	S	1	1	0.0158983	S	0.0173972	1	1	S	2	2	0.043845	S	2	2	0.0244011	S	1	1	0.033947	S	1	1
25896	INTS7	54.3333	S	12	12	0.101397	S	4	4	0.0357981	S	6	6	0.0386985	S	8	8	0.0579026	A	2	2	0.00925711	S	7	7	0.0399013	S	7	7	0.0464377	S	0.0914985	10	10	S	16	21	0.627129	S	13	14	0.29631	S	18	23	0.803164	S	20	28
55656	INTS8	49.8	S	6	6	0.0714784	S	4	4	0.0443851	S	5	5	0.0526077	S	7	7	0.049782	A	1	1	0.00513077	S	4	4	0.0382561	S	4	4	0.0455775	S	0.0716335	8	8	S	9	13	0.280806	S	8	9	0.128829	S	11	14	0.421625	S	14	20
9889	ZBED4	71	S	7	8	0.0975861	S	6	6	0.0804119	S	5	6	0.0483934	S	3	3	0.0329298	A	1	2	0.0089565	R	4	5	0.0379309	S	4	4	0.0470037	S	0.0540154	7	5	S	7	7	0.123642	S	5	6	0.0911013	S	6	6	0.0985205	S	3	3
23394	ADNP	75	S	14	15	0.13497	S	6	6	0.0416566	S	9	9	0.0562147	S	5	7	0.0411358	A	1	1	0.00519115	S	4	5	0.0271206	S	3	3	0.0187957	S	0.049942	5	5	S	9	10	0.180434	S	5	6	0.0355181	S	13	19	0.347749	S	13	21
2960	GTF2E1	27	S	3	3	0.0331242	S	1	1	0.0370645	S	2	2	0.00780058	S	1	1	0.0273735	S	2	2	0.0384724	S	1	1	0.0384481	S	1	1	0.0429429	S	0.0481232	2	2	S	1	1	0.0323543	S	1	2	0.0290833	S	1	1	0.0413135	S	3	3
6598	SMARCB1	21	S	1	1	0.0282632	S	1	1	0.0230946	S	2	2	0.0420376	S	2	2	0.0204308	S	2	2	0.0367318	S	3	3	0.0365245	S	3	3	0.0342365	S	0.0279299	1	1	S	1	1	0.0175337	S	1	1	0.0110884	S	2	2	0.0517826	S	6	7
5434	POLR2E	8.5	S	4	4	0.0628338	S	2	2	0.0427493	S	3	3	0.0706364	S	1	1	0.0140236	S	5	5	0.0851743	S	3	3	0.0569206	A	1	1	0.00294505	S	0.0460497	2	2	S	9	17	1.31951	S	9	15	0.982105	S	6	12	1.0982	S	9	17
26277	TINF2	23.2	S	2	2	0.0233791	S	3	3	0.0256666	S	3	3	0.0240827	S	5	5	0.025033	S	2	2	0.0175787	S	2	2	0.0107972	S	2	2	0.0164743	S	0.0161161	2	2	S	8	9	0.360732	S	9	11	0.498773	S	8	8	0.401565	S	7	9
55756	INTS9	33.75	S	5	5	0.0375059	S	5	7	0.0434805	S	4	5	0.0503395	S	2	2	0.00970312	R	3	3	0.0274481	S	4	4	0.0294535	S	5	5	0.0524246	S	0.0394596	4	3	S	8	11	0.231107	S	5	6	0.116285	S	7	10	0.198146	S	12	17
6726	SRP9	6.5	S	1	1	0.0377509	S	1	1	0.0393436	R	1	1	0.0500393	S	1	1	0.0193305	S	2	2	0.0432088	S	2	3	0.0398591	S	2	2	0.0353118	S	0.0532272	4	2	S	3	4	0.175444	S	4	4	0.0908843	S	3	3	0.173411	S	3	5
22803	XRN2	46.6	S	9	9	0.185946	S	5	5	0.0876255	R	6	6	0.102539	S	3	3	0.0240113	R	1	1	0.00301955	S	5	5	0.0821554	S	3	3	0.0738608	S	0.122195	9	9	S	6	6	0.194843	S	3	5	0.144142	S	7	8	0.277429	S	17	20
7392	USF2	15.2222	S	8	10	0.20766	S	2	2	0.101697	S	6	7	0.094359	S	6	8	0.132614	S	5	10	0.175812	S	5	8	0.125635	S	4	5	0.140547	S	0.0650944	5	5	S	7	13	0.666782	S	8	16	0.762224	S	7	12	0.727538	S	5	8
129685	TAF8	13.5	S	3	4	0.0831822	S	2	2	0.0577385	S	4	5	0.134558	S	3	3	0.0560557	S	4	5	0.119765	S	3	3	0.0836672	S	3	3	0.0771393	S	0.0666335	3	3	S	4	7	0.188101	S	4	7	0.178367	S	4	6	0.199013	S	4	6
81556	INTS14	27.6667	S	1	1	0.00949547	S	2	2	0.0214121	S	1	1	0.0109682	S	1	1	0.00975422	S	3	3	0.022824	S	5	5	0.0286384	S	4	4	0.0335687	S	0.0315921	5	5	S	8	8	0.173852	S	5	7	0.160315	S	8	8	0.345255	S	10	12
7572	ZNF24	18.5	S	4	4	0.0551685	S	3	3	0.0340389	S	3	3	0.0434005	S	4	4	0.0243761	S	4	4	0.0618945	S	3	3	0.0390095	R	1	1	0.0206256	S	0.023918	3	3	S	5	5	0.171619	S	4	5	0.0828642	S	9	9	0.294134	S	8	10
9913	SUPT7L	9.66667	S	3	3	0.0365807	S	4	4	0.0601528	S	5	5	0.0900615	S	4	4	0.0439773	S	4	4	0.0743342	S	4	4	0.0679899	S	3	3	0.0503227	S	0.0099839	2	2	S	4	4	0.185057	S	5	6	0.231205	S	5	5	0.238291	S	6	6
79034	C7orf26	26.3333	S	2	2	0.0148514	S	1	1	0.00980314	S	1	1	0.00979109	R	1	1	0.00419901	S	1	1	0.00520235	S	1	1	0.0128489	S	2	2	0.0241318	S	0.0234701	2	2	S	2	2	0.035449	S	4	6	0.0613128	S	3	5	0.137186	S	4	7
5644	PRSS1	19	S	1	4	0.23688	S	1	2	0.184236	S	1	3	0.179505	S	1	4	0.17226	S	1	2	0.0743801	S	1	4	0.138812	S	1	4	0.179448	S	0.159804	3	1	S	1	5	0.290855	S	1	4	0.225083	S	1	4	0.226638	S	1	4
65057	ACD	21.3333	S	3	3	0.0328779	S	2	2	0.02474	S	2	2	0.0380617	S	1	1	0.00771051	S	2	2	0.0253848	S	1	1	0.0178922	S	3	3	0.0364309	S	0.00556826	1	1	S	4	4	0.224746	S	3	3	0.232453	S	3	4	0.274915	S	3	4
6742	SSBP1	11	S	2	2	0.0310275	S	3	3	0.0228031	S	3	3	0.0569547	S	2	2	0.0197274	S	5	8	0.110143	S	2	3	0.0377044	S	3	3	0.0706542	S	0.0221002	3	3	S	9	19	1.63481	S	10	19	1.30425	S	8	14	0.926232	S	7	14
4085	MAD2L1	15	S	2	2	0.0108051	S	1	1	0.00571626	S	2	2	0.0133788	S	2	2	0.00832717	S	2	2	0.00988283	S	1	1	0.0073997	S	2	2	0.0129193	S	0.00321825	1	1	S	3	3	0.0264587	S	1	1	0.00836335	S	1	1	0.0230142	S	3	3
2355	FOSL2	13.5	S	4	4	0.18597	S	3	3	0.158311	S	4	4	0.193761	S	2	3	0.110004	S	4	5	0.160522	R	1	1	0.138433	R	2	2	0.191493	S	0.197176	5	5	S	2	2	0.0804407	S	2	3	0.0711971	S	1	2	0.0651392	R	1	1
132660	LIN54	32.25	S	7	9	0.108895	S	8	8	0.0723351	S	9	14	0.112611	S	10	16	0.109889	S	2	2	0.00634118	S	9	12	0.0677498	S	11	13	0.0986247	S	0.111628	13	10	S	10	14	0.279564	S	11	15	0.208917	S	11	17	0.379028	S	10	12
892	CCNC	13	S	2	2	0.0217131	S	2	2	0.0202097	S	3	3	0.0634687	S	4	4	0.0322032	S	1	1	0.00561476	S	3	3	0.0373681	S	1	1	0.0184819	S	0.0279595	3	3	S	6	6	0.151751	S	3	3	0.0535523	S	7	7	0.220729	S	6	6
6137	RPL13	11.5	S	2	2	0.0182842	S	2	2	0.00971659	S	2	2	0.0181952	S	1	1	0.00454795	S	3	3	0.0166951	S	2	2	0.0131455	S	2	2	0.0227188	S	0.0212533	2	2	S	4	4	0.0411161	S	4	4	0.0363461	S	4	4	0.0764913	S	3	4
9442	MED27	20.3333	S	3	6	0.0735218	S	3	4	0.0609157	S	8	13	0.202645	S	4	4	0.0278954	S	4	5	0.0799017	S	5	7	0.0960636	S	3	3	0.025397	S	0.0668803	6	4	S	10	12	0.261992	S	5	5	0.048032	S	10	16	0.458725	S	8	12
64207	IRF2BPL	45	S	1	1	0.00914385	S	1	1	0.00642188	S	1	1	0.00604177	S	1	1	0.0101483	S	2	3	0.011497	S	2	2	0.0106171	S	2	2	0.0113352	S	0.0724322	6	6	S	5	6	0.0575101	S	3	3	0.0147563	S	12	15	0.294613	S	14	30
571	BACH1	48	S	3	3	0.0190076	S	3	3	0.0177193	S	2	2	0.00783268	S	2	2	0.00575812	R	1	1	0.00619532	S	2	2	0.00994875	S	4	5	0.0184014	S	0.0172377	3	3	S	4	5	0.0462555	S	2	2	0.0248388	S	4	4	0.0389356	S	1	1
8085	KMT2D	276.222	S	4	4	0.013114	S	1	1	0.00360196	S	15	15	0.0862701	S	7	7	0.0269579	R	1	1	0.00359946	S	4	4	0.0116464	S	6	7	0.0313484	S	0.00359157	1	1	S	10	10	0.139202	S	2	2	0.0360924	S	23	27	0.616285	S	18	18
80012	PHC3	33.7059	S	7	7	0.163072	S	4	4	0.0884279	S	5	5	0.0852408	S	4	5	0.103306	R	1	1	0.00510518	S	4	4	0.0772382	S	5	5	0.0765043	S	0.110308	3	3	S	5	6	0.143529	S	4	5	0.0745997	S	4	6	0.212863	S	6	11
57167	SALL4	48	S	5	5	0.0842212	S	5	5	0.0574952	S	6	6	0.0751475	S	7	7	0.0947876	A	1	1	0.00412679	S	3	3	0.0481487	S	5	5	0.0544924	S	0.0819216	5	5	S	13	17	0.386608	S	9	11	0.31509	S	14	15	0.377646	S	11	12
55907	CMAS	30	S	3	3	0.0346197	S	2	2	0.012714	S	1	1	0.00987185	S	2	2	0.00829141	S	1	1	0.00853121	S	4	5	0.0250005	S	1	1	0.0096213	S	0.0102296	1	1	S	8	14	0.288722	S	10	18	0.472539	S	9	13	0.336436	S	8	13
84954	MPND	22.75	S	3	3	0.0669524	S	2	3	0.0410802	S	2	2	0.0350573	S	4	4	0.0782038	S	6	7	0.0936693	S	3	3	0.0440423	S	4	5	0.0771738	S	0.0476719	5	5	S	3	4	0.106814	S	4	5	0.113126	S	4	4	0.107339	S	5	5
6626	SNRPA	14	S	3	3	0.0302685	S	2	2	0.0286469	S	4	4	0.0504322	S	4	4	0.0267631	S	3	3	0.0388011	S	4	4	0.0384194	S	3	3	0.0316516	S	0.0473362	5	5	S	4	4	0.032576	S	2	2	0.0100855	S	4	4	0.092156	S	4	4
6130	RPL7A	13	S	2	2	0.0125747	S	1	1	0.00707306	S	2	2	0.0172585	A	1	1	0.0040656	A	1	1	0.00402611	S	1	1	0.00377642	S	3	3	0.0209818	S	0.00957932	2	2	S	3	3	0.0559253	S	3	3	0.0405515	S	5	5	0.0844337	S	7	7
23595	ORC3	40.1429	S	2	2	0.0231941	S	1	1	0.0083633	R	1	1	0.0123965	S	2	2	0.018412	S	2	2	0.00938627	S	2	2	0.0216015	S	2	2	0.0274373	S	0.0252318	2	2	S	2	2	0.506533	S	4	5	0.186399	S	6	7	0.500822	S	4	6
1173	AP2M1	29.3333	S	4	4	0.0215331	R	2	2	0.0103062	R	1	1	0.00896713	S	2	2	0.0101132	S	1	1	0.00945508	S	5	5	0.0314964	R	2	2	0.0207527	S	0.0399347	4	4	S	8	9	0.206402	S	9	10	0.188269	S	12	15	0.459916	S	15	21
10657	KHDRBS1	22	S	4	4	0.0546906	R	3	3	0.119906	S	5	7	0.226611	S	7	9	0.167709	S	5	7	0.180468	S	5	7	0.143146	S	6	10	0.271106	S	0.349596	12	8	S	7	15	0.774038	S	7	11	0.587095	S	10	21	1.91516	S	14	55
92822	ZNF276	31	S	3	3	0.0317771	R	1	1	0.0209383	S	5	5	0.0814458	S	4	4	0.0228673	S	3	3	0.0285051	S	2	2	0.0402354	S	4	4	0.0593975	S	0.0438259	4	4	S	4	5	0.0712799	S	3	4	0.0450753	S	2	3	0.0360446	S	1	2
27043	PELP1	44	S	2	2	0.00956274	R	2	2	0.0135706	S	1	1	0.00487844	S	2	2	0.00974824	S	1	1	0.003288	S	2	2	0.00477561	R	2	2	0.00412746	S	0.0130417	2	2	S	4	5	0.0761125	S	3	3	0.0368321	S	9	13	0.330444	S	12	21
80306	MED28	11	S	2	3	0.0640026	R	1	1	0.0559319	S	3	4	0.137842	R	2	2	0.0403229	S	2	3	0.0726248	S	1	2	0.0758606	S	1	2	0.0710206	S	0.059874	2	1	S	2	3	0.158855	S	2	2	0.0137138	S	2	3	0.152717	S	2	3
138046	RALYL	18.5	S	1	1	0.0120113	R	1	1	0.0109725	S	1	1	0.0148037	S	1	1	0.0069207	S	1	1	0.00961042	S	1	1	0.0129887	S	1	1	0.0138198	S	0.0129507	1	1	S	1	1	0.0206426	S	1	1	0.012729	S	1	1	0.0273966	S	2	2
51428	DDX41	42	S	3	3	0.0286937	R	2	2	0.0135651	S	4	4	0.0365487	S	3	3	0.02657	S	2	2	0.0118261	R	2	2	0.0156017	S	4	4	0.0390033	S	0.0316523	3	3	S	5	6	0.073971	S	2	2	0.0212259	S	11	16	0.375413	S	15	21
55588	MED29	10.5	S	2	2	0.04323	A	1	1	0.0115178	S	2	3	0.0729676	S	2	2	0.0315491	S	2	3	0.0276307	A	1	1	0.0112894	A	1	1	0.0116123	R	0.0243331	1	1	S	4	4	0.0927159	S	1	1	0.0322145	S	3	4	0.122389	S	3	4
6883	TAF12	11.6667	S	3	3	0.0698208	A	1	1	0.0326932	S	4	4	0.106685	S	2	2	0.0332543	S	4	4	0.0915491	S	4	4	0.0827171	S	3	3	0.0536945	S	0.0668664	3	3	S	5	6	0.176937	S	2	3	0.0762769	S	4	5	0.101416	S	4	4
5432	POLR2C	17	S	3	3	0.0278845	A	1	1	0.00424414	S	5	5	0.0468668	S	4	4	0.0253524	S	3	3	0.0301145	S	3	3	0.0205714	S	3	3	0.0242133	S	0.0197823	3	3	S	3	3	0.0498315	S	2	3	0.0251581	S	4	4	0.0641865	S	6	6
23326	USP22	26.5	S	2	2	0.0233847	S	5	7	0.0733048	S	6	8	0.100835	S	4	4	0.0355585	S	5	5	0.0710778	S	5	6	0.0855074	S	4	6	0.082956	S	0.0735161	6	5	S	6	7	0.11775	S	5	5	0.0774803	S	6	8	0.179271	S	6	9
8379	MAD1L1	35.7778	S	3	3	0.00996253	S	1	1	0.00380868	S	2	2	0.00704892	S	5	5	0.0208438	S	1	1	0.00141555	S	1	1	0.00230619	S	5	5	0.0330476	S	0.0218676	4	4	S	6	8	0.102452	S	1	1	0.0849211	S	12	13	0.475874	S	12	16
124359	CDYL2	27.5	S	1	1	0.0121489	S	2	2	0.0227487	S	2	2	0.0266588	S	1	1	0.00975563	S	4	4	0.0334305	S	2	2	0.0287078	S	2	2	0.0323372	S	0.0394755	3	3	S	4	5	0.185541	S	7	9	0.235523	S	4	4	0.149348	S	2	2
1820	ARID3A	26	S	1	1	0.00615665	S	2	2	0.00552138	S	4	4	0.0321526	S	4	4	0.0170112	S	3	3	0.0162259	S	4	4	0.019387	S	4	4	0.0257412	S	0.0265854	4	4	S	4	7	0.0745499	S	5	7	0.0368894	S	5	7	0.0461438	S	4	5
3728	JUP	48	S	1	1	0.0108196	S	2	2	0.00507405	S	21	40	1.28042	S	2	2	0.00193731	S	1	2	0.00694585	S	1	1	0.00232953	S	3	3	0.0100338	S	0.0198411	4	3	S	2	4	0.0220018	S	1	1	0.00538994	S	2	4	0.0241543	S	9	17
400506	KNOP1	30	S	2	2	0.0100727	S	1	1	0.00771749	S	1	1	0.0155844	R	1	1	0.0037352	S	2	2	0.0175137	A	1	1	0.00305808	S	2	2	0.016005	S	0.0141809	2	2	S	7	7	0.136363	S	7	7	0.142614	S	8	8	0.156239	S	5	5
4783	NFIL3	30	S	2	2	0.00451013	S	2	2	0.00953279	S	2	2	0.0125687	S	3	3	0.0114757	R	1	1	0.00382475	S	3	3	0.0169283	S	3	3	0.0193855	S	0.015274	3	3	S	2	2	0.0257242	S	3	3	0.0291729	S	3	3	0.0312966	R	1	1
4999	ORC2	33.5	S	1	1	0.0134397	S	2	2	0.0128574	S	4	4	0.029402	S	3	3	0.00933673	A	1	1		S	2	2	0.0098875	S	2	2	0.00738402	S	0.0149477	4	4	S	6	7	0.100187	S	4	5	0.0562501	S	4	4	0.119161	S	5	7
6201	RPS7	10	S	2	2	0.016363	S	3	3	0.0317771	S	3	3	0.0340754	R	1	1	0.00597622	S	3	3	0.0226632	S	4	5	0.047258	S	3	3	0.0251406	S	0.0464335	4	4	S	6	8	0.226114	S	6	10	0.185432	S	7	9	0.22733	S	8	13
6432	SRSF7	6	S	2	2	0.024362	S	3	3	0.0327214	S	3	3	0.0355799	R	1	1	0.00976075	S	2	2	0.0322042	S	3	3	0.036285	S	2	2	0.026202	S	0.0309237	2	2	S	2	2	0.0506274	S	2	2	0.0365087	S	3	3	0.0737726	S	4	5
2241	FER	38.4167	S	1	4	0.167907	S	1	7	0.444876	S	1	5	0.389122	S	1	4	0.48288	S	1	4	0.0818343	S	1	5	0.419922	S	1	5	0.461496	S	0.401886	5	1	S	1	2	0.014649	S	1	2	0.0181782	S	1	1	0.00683924	S	1	1
84148	KAT8	26.6667	S	2	2	0.0101493	S	2	2	0.249757	S	4	4	0.0649583	S	4	4	0.0341236	S	3	3	0.0239066	S	6	6	0.0569761	S	7	7	0.0922609	S	0.0571103	5	5	S	7	7	0.146071	S	9	10	0.186789	S	8	11	0.283612	S	9	11
10042	HMGXB4	26.25	S	3	3	0.0528795	S	2	3	0.0407259	S	3	4	0.0748357	R	3	3	0.029387	S	4	4	0.0574353	S	3	3	0.0385333	S	4	5	0.0813374	S	0.0805896	6	5	S	3	5	0.0668742	S	4	5	0.0793575	S	4	7	0.11378	S	4	7
84246	MED10	9	S	3	4	0.0518091	S	3	3	0.0501766	S	4	5	0.145354	S	2	3	0.0455106	S	3	3	0.051378	S	3	3	0.069123	S	3	3	0.0577405	S	0.0543442	3	3	S	2	3	0.0973903	S	3	3	0.0575786	S	3	4	0.0995001	S	4	6
3146	HMGB1	9	S	2	2	0.0252047	S	1	1	0.0144753	S	2	4	0.0390225	S	2	2	0.0156147	S	4	7	0.0694798	S	2	2	0.0193486	S	2	2	0.0182398	S	0.0136343	1	1	S	5	6	0.090762	S	6	8	0.151434	S	1	1	0.0118294	S	3	3
6202	RPS8	11	S	1	1	0.0063219	S	1	1	0.00608624	S	2	2	0.0142055	R	1	1	0.00511358	S	2	2	0.0143011	S	2	2	0.0102348	S	1	1	0.00869021	S	0.0168674	3	3	S	3	3	0.0921724	S	3	3	0.0419457	S	3	3	0.115068	S	4	7
116113	FOXP4	34	S	3	4	0.0194692	S	1	1	0.00471351	S	3	3	0.0228477	S	2	2	0.0156729	A	1	1	0.00597782	R	3	4	0.0157412	S	3	5	0.0542208	S	0.0298134	4	3	S	3	3	0.0539199	S	2	2	0.0323384	S	3	4	0.061719	S	2	2
400569	MED11	6.5	S	1	2	0.0358633	S	1	1	0.0315525	S	2	2	0.0701122	S	2	2	0.0417578	S	3	3	0.0789424	S	1	2	0.0442643	S	1	1	0.0337352	S	0.0330568	1	1	S	2	2	0.103393	S	2	2	0.0178385	S	3	3	0.10659	S	2	2
84948	TIGD5	42	S	3	3	0.00930454	S	3	3	0.0204276	A	1	1	0.00385557	R	1	1	0.00671858	S	3	3	0.0112986	S	1	1	0.0054473	S	3	3	0.0156817	S	0.00496919	1	1	S	2	2	0.00980411	S	2	2	0.0113955	S	1	1	0.00689379	S	1	1
8099	CDK2AP1	6	S	2	3	0.322115	R	1	2	0.284004	S	3	6	0.556216	S	2	4	0.223762	S	4	4	0.534826	S	3	4	0.359908	S	2	3	0.264124	S	0.282453	4	3	S	4	12	1.34715	S	4	4	0.680572	S	4	6	0.767295	S	4	6
6191	RPS4X	21	S	2	2	0.0206926	R	1	1	0.0109729	S	2	2	0.0262022	S	2	2	0.0157647	S	2	2	0.0173562	S	1	1	0.0149858	S	2	2	0.0228134	S	0.0235399	2	2	S	4	4	0.125727	S	6	6	0.0775962	S	5	5	0.165576	S	8	13
2002	ELK1	12.5	S	1	1	0.00904974	R	2	2	0.0101651	S	2	2	0.0213827	S	2	2	0.013523	A	1	1	0.00644818	A	1	1	0.00866417	S	2	2	0.0179293	S	0.0109417	1	1	S	1	1	0.0134423	S	2	2	0.0228757	S	1	1	0.0164577	S	1	1
57594	HOMEZ	28	R	1	1	0.00804925	S	1	1	0.0050362	S	3	3	0.0261428	S	3	3	0.017277	S	2	2	0.0197311	S	2	2	0.0158398	S	3	3	0.0185026	S	0.0196852	3	3	S	6	7	0.123324	S	5	9	0.114172	S	5	7	0.133308	S	4	5
2077	ERF	24	R	3	3	0.0322832	S	5	5	0.0548199	A	1	1	0.0182148	S	4	5	0.0619759	S	4	4	0.0582377	S	3	3	0.0406623	S	6	7	0.0898871	S	0.0856144	6	5	S	7	8	0.200097	S	6	8	0.168102	S	5	6	0.181024	S	7	8
54502	RBM47	19	R	3	3	0.0156814	R	2	2	0.0142332	S	5	5	0.0583822	R	4	4	0.0192963	S	4	4	0.0482306	R	2	2	0.0156196	S	4	4	0.0366533	S	0.0380665	4	3	S	8	15	0.349825	S	6	8	0.211992	S	9	15	0.478074	S	12	19
84135	UTP15	29.6667	R	3	3	0.0113795	S	5	5	0.033726	S	5	5	0.0434082	S	4	5	0.0315011	S	2	2	0.00844911	S	3	3	0.0250967	S	5	5	0.0428307	S	0.0287913	4	4	S	16	19	0.61351	S	19	25	0.786785	S	20	24	0.863472	S	20	26
219541	MED19	10	R	1	2	0.0495995	S	1	1	0.0535303	S	2	3	0.167243	R	1	1	0.0225321	S	1	1	0.0622214	S	2	3	0.0942197	S	2	3	0.0954832	S	0.0903915	3	2	S	2	5	0.191453	S	1	2	0.0760263	S	2	6	0.279349	S	2	6
861	RUNX1	21	R	2	2	0.0193177	S	3	4	0.0313208	S	5	5	0.0408574	S	5	6	0.0330095	S	2	2	0.0186787	S	3	4	0.0285522	S	4	5	0.0543191	S	0.0302839	4	4	S	7	7	0.131845	S	6	6	0.103033	S	4	4	0.0573303	S	3	4
7013	TERF1	25.625	R	2	2	0.00871268	R	2	2	0.0100328	S	3	3	0.0204277	S	2	2	0.0124107	S	2	2	0.00910371	S	3	3	0.0199818	S	2	2	0.0146979	S	0.0191947	3	3	S	8	11	0.244207	S	5	7	0.204199	S	7	9	0.264463	S	7	8
11338	U2AF2	19.75	R	2	2	0.0646435	R	3	4	0.0961634	S	4	5	0.131723	S	3	3	0.0602842	S	3	4	0.0714565	S	3	3	0.1	S	4	5	0.163261	S	0.109888	2	2	S	6	8	0.283992	S	6	11	0.326807	S	8	17	0.539984	S	10	26
6188	RPS3	15.6667	A	1	1	0.00254544	R	2	2	0.0105362	S	3	3	0.0212091	S	1	1	0.00473117	S	4	4	0.0137338	S	3	3	0.00992058	S	2	2	0.0122496	S	0.0148208	3	3	S	5	5	0.0812911	S	3	3	0.037031	S	7	8	0.153445	S	11	15
83741	TFAP2D	23	S	3	6	1.25881	S	2	5	1.35624	S	3	4	1.21809	S	3	4	0.685977	S	3	4	1.13477	S	2	5	1.44549	S	3	9	1.32462	S	1.18939	6	3	S	3	4	1.31345	S	3	5	1.32938	S	4	5	1.35164	S	3	5
221504	ZBTB9	25	S	3	4	0.0369705	S	3	4	0.0616304	S	2	2	0.0585524	S	4	4	0.0438569	S	4	4	0.0722575	S	3	3	0.0572558	S	3	4	0.0600993	S	0.0556535	3	3	S	2	2	0.0134778	S	3	3	0.0284256	S	3	3	0.0297073	S	2	2
84661	DPY30	5.66667	S	4	9	0.546786	S	2	3	0.290816	S	4	6	0.445242	S	4	6	0.193228	S	4	8	0.533439	S	4	6	0.332625	S	4	7	0.316146	S	0.273067	7	4	S	4	6	0.242566	S	2	2	0.043685	S	3	4	0.209813	A	2	2
311	ANXA11	25.5	S	2	2	0.00957353	S	4	4	0.0253153	S	4	4	0.0299968	S	4	4	0.0279398	S	1	1	0.00535076	S	1	1	0.0104451	S	6	6	0.0508158	S	0.0319395	5	5	S	5	5	0.0408854	S	4	4	0.0248313	S	3	3	0.0113524	S	3	3
6129	RPL7	14.5	S	1	1	0.0137171	S	1	1	0.0104912	S	1	1	0.0180386	S	1	1	0.00192025	S	1	1	0.00208407	S	1	1	0.011956	S	2	2	0.00593741	S	0.0196383	2	2	S	1	1	0.0328222	S	1	1	0.0220347	S	2	2	0.0510298	S	5	7
51157	ZNF580	13	S	1	1	0.0166569	S	1	1	0.0136736	S	1	1	0.00469162	S	2	2	0.0124408	S	1	1	0.0130739	S	2	2	0.0156858	R	1	1	0.0136465	S	0.0174253	2	2	S	1	1	0.00661733	S	2	2	0.0139017	S	1	1	0.00578399	S	2	2
9014	TAF1B	24.2	A	1	1	0.00407256	A	1	1	0.00435644	S	1	1	0.00507078	S	2	2	0.00311604	R	1	1	0.00356484	S	2	2	0.00925319	A	1	1	0.00542046	A	0.00444066	1	1	S	1	1	0.00307199	S	2	2	0.0179714	S	1	1	0.0106634	S	1	1
5886	RAD23A	18.5	S	6	6	0.0753997	S	5	20	0.030797	S	6	8	0.0816186	S	4	4	0.00287186	S	6	6	0.0567196	S	7	8	0.0683419	S	5	7	0.0640175	S	0.0503502	6	5	S	4	4	0.0667261	S	4	5	0.00641969	S	4	5	0.00502367	A	2	2
7541	ZBTB14	29	S	4	5	0.0591192	S	4	4	0.0413927	S	5	5	0.0876712	S	4	4	0.0553926	S	3	3	0.0434607	S	6	7	0.105381	S	4	4	0.0793196	S	0.0503251	4	4	S	3	3	0.103346	S	4	5	0.146463	S	2	3	0.0984202		0	0
4069	LYZ	11	S	3	5	0.10977	S	1	2	0.049647	S	4	7	0.168239	S	2	4	0.0527025	S	1	1	0.0339314	S	2	3	0.0529993	S	2	2	0.0371293	S	0.0545307	4	2	S	2	2	0.0150579	S	2	2	0.00807593	S	2	2	0.00738511		0	0
10413	YAP1	15.625	S	6	6	0.126243	S	6	7	0.168929	S	7	8	0.211542	S	7	8	0.154518	S	7	8	0.146755	S	7	7	0.209707	S	10	12	0.234927	S	0.229791	10	7	S	1	1	0.0079934	S	2	2	0.0299497	S	1	2	0.0653958		0	0
7579	ZSCAN20	59.8	S	7	8	0.140324	S	4	5	0.0721781	S	5	6	0.0668443	S	6	7	0.0772201	S	1	2	0.0157139	S	5	5	0.0529166	S	5	5	0.0686901	S	0.0789152	6	5	S	3	3	0.0325523	S	2	2	0.0199042	S	1	1	0.015295		0	0
6929	TCF3	30	S	4	5	0.0406905	S	2	3	0.0170433	S	3	4	0.0413633	S	6	7	0.04715	S	3	4	0.0216252	S	3	4	0.0198698	S	6	7	0.0691268	S	0.0669908	6	5	S	1	1	0.00550681	S	1	1	0.00121002	S	1	1	0.00617723		0	0
6884	TAF13	6	S	2	2	0.0140621	S	1	1	0.0271931	S	1	1	0.0260943	S	1	1	0.00289653	S	1	1	0.0315392	S	1	1	0.0392221	S	1	1	0.0261623	S	0.0222331	1	1	S	2	2	0.0308461	S	2	2	0.0263728	S	2	2	0.0244864		0	0
4152	MBD1	29.2708	S	3	3	0.0391833	S	4	4	0.0535274	S	2	2	0.0543007	R	3	3	0.0263237	S	3	3	0.0430655	S	2	2	0.0351666	S	6	6	0.0724743	S	0.0637953	5	5	S	1	1	0.00327776	S	1	1		S	1	1	0.00531781		0	0
1810	DR1	9	S	3	3	0.0390619	S	2	2	0.0328682	S	3	3	0.0461349	R	1	1	0.00806446	S	2	2	0.0438191	S	1	1	0.0105339	S	1	1	0.00959191	S	0.0332036	3	3	S	3	3	0.0483346	S	1	1	0.0179241	S	2	2	0.0201906		0	0
162979	ZNF296	28	S	3	4	0.0609056	S	4	5	0.0930647	S	4	5	0.112571	S	3	4	0.0738784	S	4	4	0.0762301	S	2	3	0.058929	S	5	6	0.122899	S	0.0954963	5	3	S	3	4	0.0415411	S	2	3	0.033872	S	2	2	0.0214511		0	0
1628	DBP	17.5	S	2	2	0.0293289	S	3	3	0.0194846	S	2	2	0.0230416	S	1	1	0.0121766	S	1	1	0.0159017	S	2	2	0.0192494	S	1	1	0.0153231	S	0.0157419	1	1	S	1	1	0.0182071	S	2	2	0.0209731	S	2	2	0.0222232		0	0
310	ANXA7	26	S	2	2	0.00726439	R	1	1	0.00246599	S	1	1	0.00581826	R	1	1	0.00221988	S	2	2	0.0377003	S	2	2	0.0117884	S	1	1	0.00348227	S	0.00125553	1	1	S	2	2	0.0177538	S	1	1	0.00348515	S	1	2	0.0203221		0	0
1958	EGR1	18	S	2	2	0.0254338	A	1	1	0.000926525	S	3	3	0.0319978	S	3	3	0.0235666	S	3	3	0.0217812	S	2	2	0.00883933	S	2	2	0.0144985	S	0.0121443	2	2	S	1	1	0.00722035	S	2	2	0.00652129	S	2	2	0.00613513		0	0
4088	SMAD3	17.8333	S	4	7	0.197233	S	3	7	0.217513	S	4	6	0.205261	S	3	5	0.105997	S	4	6	0.18907	S	4	7	0.197064	S	3	6	0.199483	S	0.185538	6	3	S	3	6	0.0820312	S	3	6	0.0925888	S	3	6	0.101441	S	3	4
9987	HNRNPDL	24	S	5	26	0.0677433	S	4	22	0.0505338	S	6	18	0.0735566	S	4	13	0.0250057	S	6	23	0.0630038	S	5	25	0.0677938	S	6	16	0.0536365	S	0.138477	21	6	S	5	9	0.0227872	S	4	9	0.00673093	S	5	8	0.0236401	S	4	6
23097	CDK19	25.8	S	3	3	0.0426709	S	3	3	0.0434255	S	4	5	0.125987	S	4	4	0.0872814	S	2	2	0.0305498	S	4	4	0.0720632	S	4	4	0.0596777	S	0.0457906	4	4	S	5	6	0.144284	S	4	5	0.125538	S	5	9	0.256293	S	4	6
6181	RPLP2	6	R	1	1	0.004968	S	1	1	0.0107966	S	1	1	0.0169478	S	2	2	0.00947869	S	2	2	0.012692	S	1	1	0.0104418	S	1	1	0.0108666	S	0.0145319	1	1	S	2	2	0.025262	S	1	1	0.00900875	S	2	2	0.0226669	S	5	5
7536	SF1	23.9474	R	2	3	0.0216236	A	1	1	0.00981323	R	1	1	0.0116071	S	2	2	0.0125088	A	1	1	0.00423766	R	1	1	0.0109758	S	2	2	0.0247822	S	0.0217305	2	2	S	2	2	0.0168451	S	1	2	0.0140191	S	2	3	0.0333746	S	4	8
5478	PPIA	12	R	1	1	0.00586868	R	1	1	0.0108258	S	1	1	0.00810449	R	1	1	0.0098307	S	4	5	0.0557071	R	1	1	0.00591486	S	1	1	0.0100331	S	0.013743	1	1	S	4	7	0.21772	S	2	2	0.0470088	S	1	1	0.0057674	S	1	1
8880	FUBP1	39.5	S	1	1	0.0174734	S	1	1	0.0172247	S	2	2	0.0160268	S	1	1	0.0187593	S	2	2	0.0116381	S	1	1	0.017274	S	1	1	0.0252687	S	0.0221305	1	1	S	4	5	0.0175161	S	2	2	0.00681419	S	1	1	0.00696523	S	7	8
6602	SMARCD1	28	R	1	1	0.00400466	S	2	3	0.0105439	S	6	6	0.0405337	S	4	4	0.0152612	S	3	3	0.023469	S	3	3	0.0246752	S	5	7	0.0409928	S	0.0296314	6	5	S	1	1	0.00633765	S	1	1	0.00446109	S	5	5	0.0454227	S	12	13
5499	PPP1CA	20.3333	S	6	6	0.070597	S	2	2	0.0378935	S	3	3	0.0419769	S	3	3	0.0315181	S	4	4	0.0785724	S	2	2	0.0281771	S	3	3	0.0358096	S	0.110523	7	6	S	6	9	0.178118	S	3	3	0.0173657	S	6	9	0.358222	S	8	12
4904	YBX1	14	S	5	10	0.546121	S	3	7	0.286126	S	8	11	0.635971	S	4	6	0.103761	S	8	12	0.619776	S	5	11	0.558576	S	4	7	0.300288	S	0.230499	8	6	S	4	5	0.234033	S	4	4	0.0506845	S	4	4	0.0855889	S	4	4
8148	TAF15	24.6667	S	2	3	0.0272169	S	2	2	0.0141479	S	3	3	0.0197048	S	3	4	0.0328667	S	2	2	0.0142514	S	3	3	0.0168908	S	3	5	0.0432731	S	0.0460161	4	3	S	3	4	0.0372724	S	2	3	0.0219543	S	2	2	0.0298243	S	3	4
55269	PSPC1	25.2857	S	5	6	0.0294544	S	3	3	0.0133057	S	2	2	0.0160549	S	4	4	0.0203826	S	2	2	0.0105768	S	1	1	0.0026204	S	2	2	0.00795359	S	0.0221377	5	4	S	2	2	0.028494	S	4	4	0.0637526	S	2	2	0.0356212	S	4	4
6601	SMARCC2	59.6667	S	7	7	0.0427607	S	5	5	0.00815061	S	7	7	0.0186892	S	8	10	0.0315344	S	1	1	0.008345	S	6	6	0.0179435	S	5	6	0.0466303	S	0.0162055	7	6	S	2	2	0.0158191	S	3	3	0.00679642	S	7	7	0.129714	S	13	21
11030	RBPMS	11.8824	S	4	5	0.0651564	S	4	4	0.0605714	S	4	5	0.113204	S	3	4	0.0427768	S	2	3	0.0393192	S	4	6	0.0814678	S	4	6	0.0809175	S	0.0368847	3	3	S	3	4	0.0694435	S	1	1	0.00750625	S	1	2	0.027887	S	2	2
6670	SP3	18.3333	S	2	4	0.0172077	R	1	2	0.0071796	S	3	5	0.108867	S	2	4	0.0221571	S	3	4	0.123673	S	3	3	0.0659391	S	2	3	0.0683447	R	0.0686446	4	3	S	1	1	0.0296803	S	1	1	0.0586234	S	1	1	0.0405984	S	1	1
6632	SNRPD1	4	S	1	2	0.0182084	S	1	1	0.0164921	S	1	1	0.0219444	S	1	1	0.0129923	S	1	1	0.0242854	S	1	1	0.0196267	S	1	1	0.0160698	S	0.0177976	1	1	S	2	3	0.090829	S	1	1	0.0393035	S	1	1	0.0135318	S	3	7
9531	BAG3	40	S	6	7	0.0784354	S	5	5	0.0775095	S	8	8	0.11484	S	9	10	0.096427	S	5	5	0.065107	S	5	6	0.0782381	S	7	8	0.12721	S	0.16497	12	10	S	3	3	0.0417313	S	1	1	0.0148627	S	5	5	0.0790725	R	3	4
54881	TEX10	49.5	S	2	2	0.00934426	S	2	2	0.00491957	S	2	2	0.00381981	S	2	2	0.00496287	S	1	1	0.00525305	R	1	1	0.00349541	S	2	2	0.0045442	S	0.0130138	3	3	S	7	7	0.0509238	S	2	2	0.00674619	S	9	12	0.164716	S	10	22
865	CBFB	9.66667	S	4	5	0.0893133	S	4	5	0.121022	S	2	2	0.0419414	S	2	2	0.0181622	S	5	6	0.114957	S	1	1	0.0173395	S	2	2	0.022338	S	0.0386358	3	3	S	1	1	0.0118564	S	1	1	0.00274658	S	1	1	0.00520847	S	1	1
122953	JDP2	8.5	R	2	2	0.0356687	S	2	3	0.0362975	S	3	3	0.0228896	S	2	3	0.0202401	S	4	4	0.0504108	S	2	3	0.0474471	S	2	3	0.0403293	S	0.0412957	3	2	S	1	1	0.00758792	S	2	3	0.0167442		0	0	0	S	2	2
2957	GTF2A1	9.66667	S	1	1	0.0180786	S	1	1	0.017198	S	1	1	0.0280625	S	1	1	0.00352084	S	1	1	0.0207614	S	1	1	0.0152303	S	1	1	0.0159793	S	0.0274418	2	2	S	1	1	0.00908372	S	1	1	0.00556728		0	0	0		0	0
29068	ZBTB44	18.375	S	1	2	0.0291904	R	2	2	0.0232433	S	3	4	0.0686036	S	3	4	0.0454853	A	1	1	0.0081358	S	3	5	0.053709	S	4	5	0.0874984	S	0.0849508	7	6	S	1	1	0.0137067	S	1	1	0.00676539		0	0	0		0	0
2171	FABP5	11	S	1	1	0.0182053	S	1	1	0.0110887	S	7	11	0.394467	S	1	1	0.0079527	S	1	1	0.00927444	S	1	1	0.00491817	S	1	1	0.00796974	R	0.00788403	1	1	S	1	1	0.0129236	S	1	1	0.00528313		0	0	0		0	0
3305	HSPA1L	40	S	11	36	1.91864	S	11	37	1.66807	S	15	40	2.33336	S	13	35	1.42974	S	13	28	1.82968	S	13	34	2.00584	S	13	38	2.40436	S	2.23989	38	14	S	15	52	3.66565	A	13	51	0	S	12	50	4.11233	S	13	50
2117	ETV3	20	R	1	2	0.00760979	S	2	2	0.0178441	S	1	1	0.0121269	S	3	3	0.0131671	S	1	1	0.0101799	S	1	1	0.00689401	S	3	3	0.0233202	S	0.0152552	2	2	S	2	2	0.00831644	A	1	1	0	S	2	2	0.00719642	A	1	1
3064	HTT	176	R	1	1	2.00181	A	1	1	0.0143246	R	1	2	1.63097	R	1	1	0.178134	R	1	1		S	1	1	0.282465	R	1	3	1.60298	R	2.02301	2	1	S	1	2	2.22772		0	0	0	S	1	2	2.16221	R	1	2
4801	NFYB	6	S	2	4	0.204575	S	2	5	0.273346	S	3	6	0.400733	S	2	4	0.101289	S	3	4	0.244948	S	2	3	0.296293	S	2	3	0.223978	S	0.247114	5	2	S	1	2	0.182705		0	0	0	S	1	3	0.14469	S	1	2
6136	RPL12	11	S	1	1	0.0122416	S	1	1	0.0114081	S	1	1	0.0151762	S	1	1	0.0106184	S	1	1	0.0124063	S	1	1	0.0142099	S	2	2	0.0253684	S	0.0179344	2	2	S	2	2	0.0925563		0	0	0	S	1	1	0.0454259	S	3	5
5438	POLR2I	9	S	1	1	0.0123333	S	2	2	0.0215104	S	2	2	0.0306562	R	1	1	0.00761589	S	2	2	0.0264349	A	1	1	0.0148237	S	1	1	0.0134161	S	0.021852	2	2	S	1	1	0.00666068		0	0	0	S	1	1	0.00390892	S	1	1
7745	ZKSCAN8	36	S	2	3	0.0116297	S	1	2	0.00699104	R	1	1	0.00142291	S	3	4	0.0155579	S	3	3	0.0121564	S	3	4	0.0197092	S	4	4	0.0248057	S	0.016195	3	3	S	1	1	0.021047		0	0	0	S	1	1	0.0195431	S	1	1
79169	C1orf35	17	S	2	2	0.0158581	S	1	1	0.00543876	S	3	3	0.0263833	S	2	2	0.0130682	S	3	3	0.0138077	S	4	4	0.0216332	S	2	2	0.0166784	S	0.0186809	2	2	S	2	2	0.0101002		0	0	0	S	1	1	0.00901846	R	1	1
9314	KLF4	21.5	S	2	2	0.0255751	R	2	2	0.0272627	S	1	1	0.0190559	S	2	2	0.0196777	R	2	2	0.0259027	R	1	1	0.0163857	A	1	1	0.0154285	R	0.0109238	1	1	S	1	1	0.0127956		0	0	0	S	1	1	0.0142529	R	1	1
4771	NF2	32.75	S	3	3	0.0648749	S	4	4	0.0540712	S	3	3	0.0678628	S	5	5	0.058147	S	2	2	0.0463874	S	5	5	0.0738283	S	6	7	0.100719	S	0.0833439	5	5	S	1	1	0.0115968		0	0	0		0	0	0		0	0
7586	ZKSCAN1	26.75	S	1	1	0.00388149	R	1	1	0.00807406	S	3	3	0.0296143	S	2	3	0.0122275	S	3	3	0.0241752	R	1	1	0.00542271	R	4	5	0.0363422	R	0.0265964	4	4	S	1	1	0.00676961		0	0	0		0	0	0	S	2	2
345651	ACTBL2	24	S	7	15	1.34256	S	6	16	2.19161	S	8	20	1.86265	S	7	14	0.706645	S	9	17	1.32167	S	5	12	1.01212	S	6	13	1.35636	S	0.394683	13	6	A	6	20	0	S	7	28	0.648104	A	7	23	0	A	8	27
23466	CBX6	24	R	1	1	0.0024674	S	4	4	0.0313611	S	4	4	0.0452174	S	2	2	0.00973307	S	6	6	0.0619142	S	2	2	0.0279423	S	5	5	0.0682428	S	0.0345187	4	4	A	1	1	0	A	1	1	0	S	2	2	0.00948091	S	3	3
83439	TCF7L1	27.5	S	9	14	0.605137	S	9	15	0.607208	S	9	15	0.897324	S	8	16	0.7518	S	10	16	0.640734	S	8	17	0.797217	S	9	18	0.905205	S	0.833994	15	8	A	2	4	0	A	3	4	0	A	2	3	0	A	1	2
85446	ZFHX2	112.4	S	1	1	0.030413	S	3	3	0.0373061	S	3	3	0.0277488	S	2	2	0.0211671	S	3	4	0.0420419	S	2	2	0.0383893	S	2	2	0.0292403	S	0.0312218	2	2	A	1	1	0	A	1	1	0	A	1	1	0	A	1	2
7088	TLE1	43.9	S	5	6	0.108852	S	4	7	0.0667139	S	3	4	0.0564468	S	2	3	0.0389965	R	1	1	0.00991113	S	3	5	0.0736805	S	4	4	0.0505537	S	0.120866	6	4	A	3	3	0	A	2	3	0	A	2	3	0	A	1	1
1743	DLST	20	S	1	1	0.00911891	S	1	1	0.00660429	S	1	1	0.0154879	A	1	1	0.00542813	S	1	1	0.00590319	S	1	1	0.0106168	S	1	1	0.013449	S	0.00703851	1	1		0	0	0	S	1	1	0.00980669	S	1	1	0.0095317	S	1	1
55193	PBRM1	85.7222	S	2	2	0.0058579	S	1	1	0.00235359	S	4	4	0.0122682	S	2	2	0.00643082	A	1	1	0.00119692	S	2	2	0.00263403	S	1	1	0.00311602	S	0.016171	4	4		0	0	0	S	2	2	0.00556956	S	8	8	0.107377	S	20	21
10342	TFG	16	S	1	1	0.0177078	S	2	2	0.0226288	S	1	1	0.0243233	S	2	2	0.0315407	S	1	1	0.0208298	S	3	3	0.0482393	S	2	2	0.036077	S	0.0216079	1	1		0	0	0	S	1	1	0.00869971		0	0	0	S	1	1
57567	ZNF319	40	S	1	1	0.0309929	S	2	2	0.050463	S	4	5	0.100374	S	3	3	0.0663686	S	2	2	0.0538973	S	4	4	0.0729931	S	3	4	0.0920996	S	0.0811628	5	3		0	0	0		0	0	0	S	1	1	0.00607511	S	1	1
84159	ARID5B	57.4	S	7	7	0.0699565	S	4	4	0.0263747	S	3	3	0.0225592	S	6	6	0.0529359	S	2	2	0.00380793	S	4	4	0.021342	S	4	4	0.0298343	S	0.0683059	7	7		0	0	0		0	0	0	S	1	1	0.000634191		0	0
60528	ELAC2	36.3571	S	1	4	2.34023	S	1	3	0.0074327	S	1	2	1.6039	S	1	3	0.0702289	S	1	9	0.1244	S	1	3	1.51285	S	1	3	2.06552	S	1.98859	3	1		0	0	0		0	0	0		0	0	0		0	0
2958	GTF2A2	8	S	2	2	0.0134541	S	1	3	0.00806363	S	1	1	0.0244894	S	2	2	0.00983706	S	1	1	0.0200715	S	2	2	0.0188149	S	2	2	0.0150863	S	0.0147429	2	2		0	0	0		0	0	0		0	0	0		0	0
2874	GPS2	17	S	1	1	0.000838686	S	1	1	0.00978494	S	2	2	0.031804	S	2	2	0.00994404	S	1	1	0.0135175	S	2	2	0.0248492	S	2	2	0.0162223	S	0.019801	2	2		0	0	0		0	0	0		0	0	0	A	1	1
5977	DPF2	26.6667	S	4	4	0.0213237	S	2	2	0.0167888	S	2	2	0.0228514	S	1	1	0.00843674	S	2	2	0.0105043	R	1	1	0.0115051	S	2	2	0.0175158	A	0.0137139	2	2		0	0	0		0	0	0		0	0	0	S	2	3
158405	KIAA1958	32.5	S	6	9	0.111143	S	4	6	0.103668	S	4	4	0.0830004	S	7	9	0.0854075	S	2	2	0.0102771	S	6	9	0.130521	S	7	10	0.169587	S	0.188389	9	6		0	0	0		0	0	0		0	0	0		0	0
688	KLF5	18	S	3	6	0.0740069	S	4	5	0.192329	S	3	5	0.181668	S	4	8	0.174813	S	4	6	0.131105	S	3	7	0.132694	S	2	5	0.0664729	S	0.140474	6	4		0	0	0		0	0	0		0	0	0		0	0
2140	EYA3	20.4545	S	1	1	0.0159925	S	1	1	0.0107335	A	1	1	0.000382767	S	1	1	0.0137055	A	1	1	0.00437855	S	1	1	0.0115853	S	2	2	0.0183876	S	0.0129537	1	1		0	0	0		0	0	0		0	0	0		0	0
10771	ZMYND11	34.3333	R	3	3	0.0202849	R	2	2	0.014273	R	4	4	0.0258711	S	2	2	0.0141895	S	3	3	0.0184979	S	2	2	0.0161389	S	2	2	0.020371	R	0.0235345	3	3		0	0	0		0	0	0		0	0	0		0	0
6657	SOX2	16	S	5	10	0.453238	S	6	11	0.460023	S	7	13	0.545974	S	4	6	0.203078	S	8	13	0.587289	S	6	9	0.439495	S	7	12	0.621568	S	0.491427	10	7		0	0	0		0	0	0		0	0	0		0	0
222389	BEND7	25.0455	S	4	4	0.0317528	S	1	1	0.0100218	S	1	1	0.0205812	S	1	1		S	3	3	0.0298234	S	4	4	0.0299107	S	3	3	0.0168169	S	0.0108539	3	3		0	0	0		0	0	0		0	0	0		0	0
57491	AHRR	45	S	3	3	0.0277491	S	4	4	0.0547321	S	6	6	0.0798263	S	2	2	0.0219926	S	4	4	0.0535058	S	2	2	0.0233109	S	4	5	0.0547324	S	0.0399301	4	3		0	0	0		0	0	0		0	0	0		0	0
26039	SS18L1	10.1667	S	1	1	0.0172816	S	1	1	0.0171111	S	1	1	0.0188169	S	1	1	0.0209648	S	1	1	0.0201624	S	1	1	0.0233266	S	1	1	0.0240974	S	0.019887	1	1		0	0	0		0	0	0		0	0	0		0	0
11278	KLF12	19.7143	S	2	3	0.0393437	S	2	3	0.0463036	S	3	4	0.0428191	S	1	2	0.0171986	S	1	2	0.0370177	S	2	3	0.0478737	S	2	3	0.0417092	S	0.0374012	3	2		0	0	0		0	0	0		0	0	0		0	0
860	RUNX2	23.3333	S	5	6	0.0760312	S	2	2	0.0292817	S	3	3	0.050606	S	4	5	0.0554122	S	4	4	0.0499022	S	4	5	0.135173	S	5	5	0.0654283	S	0.0756726	4	4		0	0	0		0	0	0		0	0	0		0	0
84922	FIZ1	23	S	4	6	0.168448	S	3	5	0.175527	S	3	4	0.207467	S	3	4	0.135737	S	2	3	0.0888203	S	3	5	0.195942	S	3	5	0.224671	S	0.206001	4	3		0	0	0		0	0	0		0	0	0		0	0
7741	ZSCAN26	29.5	S	3	3	0.0298778	S	2	2	0.0180313	S	2	2	0.029139	S	3	3	0.0126959	S	2	2	0.0150948	S	4	4	0.0419255	S	4	4	0.0287778	S	0.0412439	4	4		0	0	0		0	0	0		0	0	0		0	0
51523	CXXC5	15	S	2	2	0.0484005	S	2	3	0.0453121	S	2	2	0.0487538	S	1	1	0.0237241	S	2	2	0.0419091	S	3	4	0.0592926	S	3	3	0.0639778	S	0.0578764	3	3		0	0	0		0	0	0		0	0	0		0	0
57763	ANKRA2	13.3333	S	1	1	0.00533795	S	1	1	0.00529892	R	1	1	0.00523384	R	1	1	0.00440879	S	1	1	0.0053238	S	1	1	0.00609587	R	1	1	0.00666792	S	0.00676372	1	1		0	0	0		0	0	0		0	0	0		0	0
79983	POF1B	33.3333	S	2	2	0.00657115	R	1	1	0.00426526	S	2	2	0.015902	S	1	1	0.00427789	S	1	1	0.00219663	S	1	1	0.00378041	S	1	1	0.00392064	A	0.00479854	1	1		0	0	0		0	0	0		0	0	0		0	0
286205	SCAI	42	A	1	1	0.00419514	S	1	1	0.00212245	R	1	1	0.00621021	S	3	3	0.0120597	S	1	1	0.00237414	S	1	1	0.00272998	S	2	2	0.0049859	S	0.00337171	1	1		0	0	0		0	0	0		0	0	0		0	0
339230	CCDC137	13.6667	R	1	1	0.00637013	S	1	1	0.00681663	S	4	4	0.0569728	R	2	2	0.00572741	R	1	1		S	1	1		R	1	1	0.00439604		0	0	0	S	1	1	0.0171813	S	1	1	0.0112905	S	3	3	0.0610435	S	3	3
55578	SUPT20H	20.1739	S	3	3	0.0336897	S	2	2	0.0168216	S	2	3	0.0383114	S	2	2	0.0212753	S	2	2	0.0264284	S	2	2	0.020856		0	0	0	S	0.0194064	2	1	S	3	4	0.096903	S	3	4	0.106503	S	4	6	0.189854	S	4	7
58493	INIP	4.4	S	1	1	0.00712432	S	2	2	0.0075045	S	1	1	0.00242594	R	1	1	0.0037012	A	1	1	0.00677545	S	3	3	0.0131863		0	0	0	R	0.00166773	1	1	S	3	3	0.0651574	S	2	2	0.0278905	S	2	2	0.0469638	S	5	5
84871	AGBL4	29	R	1	1	0.266206	S	1	2	0.293217	S	1	1	0.037083	R	1	1	0.0546305	S	1	1	0.103503	R	1	1	0.166089		0	0	0	R	0.181329	1	1		0	0	0		0	0	0		0	0	0		0	0
3664	IRF6	22	S	1	1	0.00430689	S	2	2	0.00705643	S	1	1	0.00446927	S	1	1	0.00358809	S	1	1	0.00325835	A	1	1	0.00343163		0	0	0		0	0	0	S	1	1	0.0053783	S	1	1	0.00756351	S	1	1	0.00590295		0	0
9643	MORF4L2	20	S	3	3	0.0261219	S	3	3	0.034791	S	3	3	0.0304294	S	1	1	0.00230328	S	4	5	0.0355432	S	2	2	0.0275188	S	2	2	0.0162462	S	0.0305366	2	2	S	5	6	0.0903289	S	4	4	0.032977	S	5	6	0.0978754	S	7	9
6908	TBP	13	S	3	4	0.149804	S	5	5	0.125563	S	5	6	0.219871	S	1	2	0.01806	S	7	8	0.192332	S	7	7	0.191704	S	4	4	0.0774567	S	0.139502	5	5	S	4	6	0.31777	S	5	8	0.375073	S	4	6	0.372758	S	5	7
317772	HIST2H2AB	6	S	2	4	1.90247	S	2	5	1.91613	S	2	4	2.36807	A	1	2	0	S	2	3	2.1204	S	2	4	2.14708	S	2	4	2.23533	S	1.91873	4	2	S	2	7	5.27576	S	3	6	4.42939	S	2	5	3.75023	S	3	6
3188	HNRNPH2	27	S	5	7	0.0409142	S	3	5	0.0254616	S	5	6	0.0985379	A	3	3	0	S	4	6	0.049393	S	4	7	0.0368219	S	4	5	0.0418276	S	0.0778583	6	4	S	5	9	0.107766	S	5	8	0.0487599	S	6	12	0.237153	S	7	14
7391	USF1	11	S	3	3	0.00166135	S	2	3	0.0262084	S	4	5	0.0828782	A	2	2	0	S	3	5	0.0320338	S	2	3	0.0332391	S	2	3	0.0306822	S	0.0344319	4	3	S	5	6	0.145698	S	4	5	0.0554425	S	6	7	0.14493	S	3	4
5017	OVOL1	16	S	5	6	0.0669319	S	4	6	0.12098	S	4	6	0.153042	A	1	2	0	S	3	3	0.0430128	S	4	6	0.0912706	S	5	6	0.124785	S	0.0815298	5	4	S	3	4	0.06496	S	3	3	0.0394464	S	3	3	0.0651307	S	4	5
23635	SSBP2	14.1667	S	2	2	0.11279	S	4	5	0.142679	S	4	4	0.113387	A	2	2	0	S	6	7	0.0987303	S	5	7	0.136751	S	5	6	0.149899	S	0.127102	5	4	A	2	2	0	S	4	4	0.116013	S	3	3	0.166926	S	3	3
51176	LEF1	19.625	S	4	10	0.020933	S	4	9	0.0213676	S	4	8	0.00244353	A	3	10	0	S	5	9	0.0287413	S	4	10	0.0243739	S	4	10	0.0341232	S	0.0200055	9	4	A	3	7	0	A	4	9	0	A	3	5	0	A	2	3
7025	NR2F1	19.5	S	11	26	0.0192949	S	10	32	0.0174587	S	9	28	0.0178836	A	8	17	0	S	8	28	0.0325248	S	9	29	0.0296955	A	8	25	0	A	0	27	9	S	5	7	0.0170922	S	5	9	0.0277186	S	5	8	0.0213298	A	5	6
54556	ING3	10.6667	S	1	1	0.0181964	S	1	1	0.0200899	S	2	2	0.0508058		0	0	0	S	1	1	0.0352504	S	1	1	0.0260563	S	1	1	0.0280397	S	0.0302245	2	2	S	3	3	0.0929099	S	2	2	0.0564238	S	3	3	0.121307	S	3	3
6147	RPL23A	9	S	1	1	0.0242602	S	1	1	0.0317026	R	1	1	0.0052053		0	0	0	R	1	1	0.0273011	S	1	1	0.0283729	R	1	1	0.0340737	R	0.0337973	1	1	S	3	3	0.0866377	S	1	1	0.00720399	S	3	3	0.0750627	S	3	3
6871	TADA2A	22.5714	R	1	1	0.00760587	R	2	2	0.018558	R	1	1	0.0065196		0	0	0	A	1	1	0.00517343	S	1	1	0.00629339	R	2	2	0.00889403	S	0.00728752	1	1	S	1	1	0.0323008	S	1	1	0.0233221	S	6	6	0.088259	S	4	4
6637	SNRPG	3.16667	R	1	1	0.0135165	S	1	1	0.00235292	S	1	1	0.00489612		0	0	0	S	1	1	0.00592693	S	2	2	0.0131463	S	1	1	0.00249965	S	0.00207364	1	1	S	1	2	0.0186584	S	2	2	0.0346255	S	1	1	0.0152918	S	1	3
5013	OTX1	13	S	1	1	0.0141526	S	1	1	0.0192641	S	1	1	0.0216977		0	0	0	S	1	1	0.0175137	S	1	1	0.0179838	S	1	1	0.0196508	S	0.0172922	1	1	S	1	1	0.0125707	S	1	1	0.0151297	S	1	1	0.0130772		0	0
84893	FBH1	64.25	S	3	3	0.0200144	S	1	1	0.00802103	S	2	2	0.010641		0	0	0	S	1	1	0.00282901	S	3	3	0.0130152	S	2	2	0.00976649	S	0.0137528	2	2	S	1	1	0.0158759	S	1	1	0.0125713	S	1	1	0.0108833		0	0
8538	BARX2	11.6667	R	1	1	0.00820916	S	1	1	0.0116406	S	1	1	0.0217981		0	0	0	R	1	1	0.0212183	S	1	1	0.0160666	S	1	1	0.0132358	S	0.010495	1	1	S	1	1	0.0114186	S	1	1	0.0109352	S	1	1	0.0111185		0	0
388698	FLG2	96	S	1	2	0.0231987	S	1	2	0.0166957	S	2	4	0.0312675		0	0	0	S	1	1	0.0123102	S	1	2	0.0151384	S	1	2	0.0219848	S	0.0157978	2	1	S	1	2	0.0135431	S	1	1	0.00856301		0	0	0	S	1	1
51188	SS18L2	6	R	2	2	0.00759447	S	2	2	0.00851543	S	2	2	0.0147873		0	0	0	S	2	2	0.00912787	S	2	2	0.00935262	A	1	1	0.00505315	S	0.00416326	1	1	S	1	1	0.0044344	S	1	1	0.0019268		0	0	0	S	1	1
6176	RPLP1	3.5	R	1	1	0.0149667	R	1	1	0.0211444	S	1	1	0.0279659		0	0	0	S	1	1	0.0250117	R	1	1	0.0191515	A	1	1	0.0171635	R	0.0227764	1	1	S	1	1	0.0672534		0	0	0	S	1	1	0.0475267	S	1	3
60592	SCOC	5.16667	R	1	1	0.00307212	R	1	1	0.010959	S	1	1	0.0146635		0	0	0	S	1	1	0.0140366	S	1	1	0.0132091	S	1	1	0.00857414	S	0.0118317	1	1	S	1	1	0.00291082		0	0	0		0	0	0	S	1	1
26233	FBXL6	27.5	R	2	2	0.0140321	S	1	1	0.0113594	R	2	2	0.0249798		0	0	0	R	1	1	0.00204849	S	1	1	0.00219222	R	2	2	0.0220041	S	0.0289252	3	3		0	0	0		0	0	0		0	0	0		0	0
51274	KLF3	17	S	1	1	0.0119453	S	1	1	0.0102621	S	1	1	0.0132045		0	0	0	S	1	1	0.0100429	S	1	1	0.0120322	A	1	1	0.00624871	S	0.0282498	2	2		0	0	0		0	0	0		0	0	0		0	0
7913	DEK	23.3333	S	5	5	0.0448338	R	1	1	0.00474703	S	2	2	0.0103465		0	0	0	A	1	1	0.00348969	S	2	2	0.0162661	R	2	2	0.00967629		0	0	0	S	5	6	0.124081	S	7	7	0.140851	S	5	5	0.115217	S	5	5
4488	MSX2	13	S	3	3	0.0523421	S	1	1	0.0186052	S	2	2	0.0485154		0	0	0	S	2	2	0.0384359	S	2	3	0.0320375	S	1	1	0.0225946		0	0	0		0	0	0		0	0	0		0	0	0		0	0
5304	PIP	12	R	1	1	0.0127496	S	2	2	0.0137277	S	2	2	0.0243255		0	0	0	S	2	2	0.0240388	S	2	2	0.0182415	A	1	1	0.0105944		0	0	0		0	0	0		0	0	0		0	0	0		0	0
9349	RPL23	9	S	1	1	0.00981942	S	1	1	0.00851099	S	1	1	0.0116169		0	0	0	S	1	1	0.00382302	S	1	1	0.00987702		0	0	0	S	0.010596	1	1	S	2	3	0.0848236	S	2	2	0.0509849	S	1	1	0.0171102	S	2	2
64426	SUDS3	17	S	3	3	0.0365688	R	1	1	0.00702545	S	1	1	0.00967528		0	0	0	A	1	1	0.0159812	S	2	2	0.0158005		0	0	0		0	0	0	S	1	1	0.0255981	S	2	2	0.0242171	S	1	1	0.0291055	S	1	1
9015	TAF1A	25.25	S	2	2	0.00756503	S	2	2	0.00837368	S	1	1	0.00345741		0	0	0	S	2	2	0.00906091	S	3	3	0.0167967		0	0	0		0	0	0	S	1	1	0.00228237	S	2	3	0.0186037		0	0	0	S	2	2
51806	CALML5	9	S	1	2	0.0258999	R	2	2	0.0155951	S	8	14	0.899262		0	0	0	S	2	2	0.0132152	R	1	1	0.00583785		0	0	0		0	0	0	S	1	1	0.0148541		0	0	0		0	0	0		0	0
11021	RAB35	14.6667	S	2	2	0.0271765	S	2	2	0.0383862	S	3	5	0.107622	S	2	2	0.0450692	S	2	2	0.0420346	S	1	1	0.001189	S	2	2	0.012043	S	0.0510861	2	2	S	2	2	0.0968006	A	1	1	0	S	3	4	0.0603385	S	3	5
5962	RDX	27	R	2	2	0.0151508	S	4	4	0.0399508	S	4	4	0.0588211	S	4	4	0.0136583	S	4	4	0.0357396	S	2	2	0.0102389	S	3	3	0.0432835	S	0.0484947	4	4	S	1	1	0.00196516	S	1	1	0.00104705		0	0	0		0	0
3868	KRT16	34	S	20	41	0.242612	S	11	17	0.0373622	S	41	114	8.04417	S	11	21	0.000441836	S	9	17	0.00126876	A	11	20	0	S	15	25	0.0429442	A	0	22	11	S	14	31	0.0933863	S	12	26	0.092644	A	9	17	0	S	17	34
347688	TUBB8	20.25	S	9	46	0.102699	S	7	45	0.105819	S	8	43	0.105401	S	8	45	0.0419346	S	7	40	0.0503319	A	7	45	0	A	9	45	0	S	0.102767	53	9	A	7	53	0	S	9	50	0.0677567	S	12	81	0.138442	S	10	82
26052	DNM3	55.5909	S	4	4	0.00310365	S	3	3	0.0106356	S	5	5	0.0129629	S	3	4	0.0160973	S	1	1	0.00120327	A	4	4	0		0	0	0	S	0.0218932	6	6	A	2	2	0	A	2	3	0	S	4	7	0.0249549	S	9	17
8655	DYNLL1	5	S	2	3	0.0132736	S	1	1	0.00938543	S	3	4	0.0264285	A	1	2	0	S	2	4	0.0738518	A	1	2	0	S	2	3	0.0108221	A	0	2	1	A	1	2	0	A	1	2	0	A	1	2	0		0	0
10528	NOP56	36	S	3	3	0.0150382	S	2	2	0.00790701	S	4	4	0.0180637	S	2	2	0.00848668	S	1	1	0.00551407		0	0	0	S	3	3	0.01562	R	0.0108481	2	2	S	10	13	0.285809	S	12	18	0.355492	S	12	15	0.384912	S	14	18
222229	LRWD1	32	S	3	3	0.0388031	S	3	3	0.0388716	S	5	5	0.0699865	S	1	1	0.0141238	S	3	3	0.0372233		0	0	0	A	1	1	0.0158642	S	0.0462228	3	3	S	8	9	0.291348	S	10	11	0.353336	S	11	12	0.392121	S	10	16
26145	IRF2BP1	40	S	2	2	0.01099	S	1	1	0.0026763	S	2	2	0.00857445	S	1	1	0.00854479	R	2	2	0.0139984		0	0	0	S	2	2	0.0217848	S	0.0538356	4	4	S	7	9	0.261611	S	3	4	0.046657	S	9	20	0.81805	S	14	24
5514	PPP1R10	63	S	3	4	0.0242155	R	1	1	0.00292178	S	1	1	0.00352442	S	2	2	0.0149014	A	1	1	0.0115847		0	0	0	S	2	2	0.00668199	S	0.0166812	2	2	S	6	7	0.179981	S	1	1	0.00575273	S	10	14	0.404369	S	8	13
130271	PLEKHH2	80.2	R	1	2	0.105182	A	1	1	0.0319078	R	1	2	0.0830048	R	1	1	0.0811202	R	1	2	0.0103987		0	0	0	R	1	3	0.0771375	A	0.0376946	2	1	S	1	3	0.0296586	S	1	4	0.0295098	S	1	4	0.0488091	S	1	2
10401	PIAS3	36	A	1	1	0.017367	R	1	1	0.00234282	S	1	1	0.00505088	S	2	2	0.00390582	S	1	1	0.00442213		0	0	0	S	1	1	0.00433811	S	0.00383635	1	1	S	2	3	0.0263848	S	3	4	0.0265059	S	4	5	0.0529573	S	2	3
6659	SOX4	18	S	1	1	0.00735589	A	1	1	0.0004361	S	1	1	0.0104979	S	1	1	0.00623628	S	1	1	0.00629853		0	0	0	S	1	1	0.00833677	S	0.00836788	1	1	S	1	2	0.0266013	S	2	2	0.0250374	S	1	1	0.00873399		0	0
10538	BATF	7	R	2	2	0.0210254	R	2	2	0.0349006	S	1	1	0.0166316	A	1	1	0.00214192	S	2	2	0.0368207		0	0	0	A	1	1	0.00927973		0	0	0	S	1	1	0.00580602		0	0	0		0	0	0		0	0
9555	H2AFY	6.46667	S	2	2	0.00888136	R	1	1	0.00319744	S	2	2	0.00998874	R	1	1	0.0027334	R	2	2	0.00621236		0	0	0	S	1	1	0.00506697		0	0	0		0	0	0	S	1	1	0.00922179		0	0	0		0	0
10427	SEC24B	51.6154	A	1	1	0.00308865	A	1	1	0.00383622	R	1	1	0.00461737	A	1	1	0.000382444	A	1	2	0.0164657		0	0	0	A	1	2	0.0137054		0	0	0		0	0	0		0	0	0		0	0	0	S	1	1
29123	ANKRD11	128.2	S	3	3	0.00847567	A	1	1	0.00204764	S	1	1	0.0028985	S	1	1	0.00184071	A	1	1	0.0028182		0	0	0		0	0	0		0	0	0	S	3	3	0.023212		0	0	0	S	2	2	0.0144291	R	1	1
83443	SF3B5	6	R	1	1		S	1	2	0.0291152	S	1	3	0.0440238	R	1	1	0.0166031	R	1	1	0.0259043		0	0	0		0	0	0		0	0	0		0	0	0		0	0	0	S	1	1	0.0320458	R	1	1
57060	PCBP4	19	A	1	1	0.00628683	A	1	1	0.0137135	R	3	3	0.00835802		0	0	0	S	2	2	0.000150267		0	0	0		0	0	0	A	0	1	1	S	2	2	0.0255292	A	1	1	0	A	1	1	0	A	1	1
26097	CHTOP	7.8	S	2	2	0.0105471	R	1	1	0.00504024	S	2	2	0.0111118		0	0	0	S	2	2	0.0214528		0	0	0		0	0	0		0	0	0	S	4	5	0.152929	S	3	5	0.066158	S	4	5	0.142202	S	3	3
23408	SIRT5	19.7778	S	1	1	0.00447316	A	1	1	0.00349561	S	1	1	0.00637518		0	0	0	S	2	2	0.00853523		0	0	0		0	0	0		0	0	0		0	0	0		0	0	0		0	0	0		0	0
6872	TAF1	90.5556	S	21	26	0.606521	S	14	18	0.322256	S	24	29	0.495707	S	16	19	0.406677	S	3	5	0.0209794	S	13	15	0.251913	S	22	28	0.439098	S	0.44359	23	19	S	14	15	0.326852	S	13	14	0.24801	S	15	17	0.33245	S	11	13
7543	ZFX	31.1	S	4	8	0.235338	S	2	5	0.197647	S	4	6	0.183609	S	4	8	0.183559	S	1	3	0.0240522	S	2	4	0.172146	S	2	5	0.0744651	S	0.223186	5	3	S	3	5	0.0808287	S	3	5	0.0948656	S	1	2	0.0475078	S	3	5
26512	INTS6	38.6667	S	8	9	0.090169	S	6	7	0.0488826	S	8	8	0.0567327	S	4	4	0.0327541	R	1	1	8.33254e-05	S	6	6	0.0340025	S	7	7	0.0521848	S	0.0509552	6	6	S	15	20	0.580828	S	10	13	0.209042	S	19	30	0.923723	S	19	27
160	AP2A1	62.5	S	8	8	0.0352922	S	3	3	0.018549	R	3	3	0.0103396	S	4	4	0.0268072	A	1	1	0.00112802	S	4	4	0.00764541	S	4	4	0.0158873	S	0.0506401	7	6	S	14	18	0.378555	S	7	10	0.108816	S	20	28	0.695532	S	19	33
4097	MAFG	12	S	2	2	0.0188682	S	4	5	0.0592629	S	3	4	0.0605227	S	2	2	0.0132292	S	2	2	0.0120673	S	4	5	0.0565768	S	3	3	0.0313731	S	0.0391007	4	3	S	2	2	0.0603272	S	2	2	0.0397356	S	3	3	0.0499005	S	2	2
140688	NOL4L	27.1429	S	8	11	0.179842	S	5	6	0.0911742	S	4	7	0.104149	S	6	8	0.0971557	S	1	1	0.00643287	S	5	7	0.106288	S	4	5	0.0862338	S	0.109045	7	5	S	2	2	0.00949031	S	1	1	0.00520481	S	2	2	0.00306807		0	0
1602	DACH1	20.5	S	10	13	0.41751	S	5	5	0.129584	S	8	9	0.277327	S	8	13	0.286211	S	2	2	0.00452865	S	7	11	0.229902	S	8	12	0.279496	S	0.265333	10	7		0	0	0		0	0	0		0	0	0		0	0
84662	GLIS2	25	S	1	1	0.0392209	S	2	2	0.0567825	S	3	3	0.0739803	S	3	4	0.0535678	S	1	1	0.00138861	S	2	2	0.0613107	S	2	2	0.0773635	S	0.067559	2	2		0	0	0		0	0	0		0	0	0		0	0
3229	HOXC13	17	S	3	3	0.0221467	A	1	1	0.0080042	S	1	2	0.0154084	S	1	1	0.00164822	S	1	1	0.00432695	S	2	2	0.0150969	S	2	2	0.0128823	S	0.0209331	3	3	S	1	1	0.0147259	S	2	2	0.0264439	S	3	3	0.0362666		0	0
7376	NR1H2	20	S	2	2	0.0164167	R	2	2	0.00975168	A	2	2	0.014597	S	1	1	0.00826625	S	2	2	0.00444948		0	0	0	S	2	2	0.0103879	A	0.008241	2	2	S	2	3	0.0552204	S	5	8	0.0952433	S	3	4	0.0936252	S	5	6
4637	MYL6	11	S	2	2	0.0200209	R	1	1	0.0117282	S	2	2	0.0239473	S	2	2	0.0238495	S	1	1	0.0100014		0	0	0	S	2	2	0.0150529	S	0.0324538	2	2	S	2	2	0.045742	S	2	2	0.016354	S	3	3	0.053692	S	4	5
376267	RAB15	14.5	S	2	2	0.0285567	S	2	2	0.0383862	S	2	4	0.116685	S	2	2	0.0468233	A	1	1	0	S	1	1	0.021402	S	2	2	0.012043	S	0.0540178	2	2	S	2	2	0.123044	S	1	1	0.0264309	S	2	3	0.0697431	S	2	4
8850	KAT2B	44.6667	S	14	15	0.239123	S	8	9	0.112674	S	9	9	0.1259	S	12	13	0.155081	A	1	1	0	S	7	7	0.0771986	S	8	8	0.11284	S	0.132058	11	11	S	4	4	0.0812392	S	4	6	0.110221	S	8	10	0.251283	S	6	8
23133	PHF8	55.4286	S	3	4	0.0134896	S	4	5	0.0048953	S	3	4	0.00560623	A	2	4	0	A	1	1	0	S	3	4	0.00540277	S	4	5	0.0132837	S	0.00838019	4	3	A	1	2	0	A	1	2	0	S	3	3	0.0244976	S	2	2
6603	SMARCD2	32.3333	S	3	3	0.00692733	S	2	3	0.0210277	S	4	5	0.0404881	S	4	5	0.0202978	A	1	1	0	R	2	2	0.0070309	S	2	3	0.00733628	S	0.0285139	5	4	S	3	3	0.0403447	S	2	2	0.0138661	S	8	8	0.155328	S	16	27
374454	KRT77	26.6667	S	8	24	0.0331923	S	4	17	0.0138488	S	6	40	0.285089	S	4	17	0.0230538	A	3	11	0	A	3	11	0	S	4	16	0.00282705	S	0.0215152	19	4	A	3	12	0	A	3	9	0	A	3	8	0	A	3	8
3851	KRT4	34	S	9	11	0.0516157	S	5	10	0.00608418	S	8	13	0.635155	S	8	10	0.0498673	A	4	15	0	A	4	7	0	A	4	7	0	S	0.0163392	9	7	S	5	6	0.019989	A	4	6	0	A	4	6	0	A	4	6
192666	KRT24	32.25	S	3	9	0.00577455	S	3	4	0.00325083	S	3	6	0.011837	S	3	6	0.000608323	A	1	4	0	A	2	2	0	A	2	7	0	A	0	3	2	A	2	5	0	A	2	4	0	A	1	3	0	A	1	2
6421	SFPQ	37.3333	S	3	3	0.0114555	S	1	1	0.00402177	S	2	2	0.00595756	S	5	5	0.017946	A	1	1	0		0	0	0	S	3	3	0.00623343	S	0.00807743	3	3	S	7	7	0.114737	S	9	9	0.171967	S	4	4	0.054499	S	12	15
6873	TAF2	67.9091	S	20	23	0.401055	S	13	13	0.12885	S	14	16	0.173534	S	15	17	0.256575		0	0	0	S	14	16	0.144254	S	16	18	0.208947	S	0.27583	18	15	S	12	14	0.228536	S	12	13	0.100928	S	15	16	0.22849	S	5	6
9202	ZMYM4	85.2	S	14	15	0.179371	S	8	8	0.0931408	S	11	11	0.123157	S	17	17	0.175292		0	0	0	S	10	11	0.0838532	S	11	11	0.0891636	S	0.127852	11	11	S	12	12	0.214004	S	9	9	0.135358	S	11	12	0.248705	S	11	11
23196	FAM120A	57.5556	S	14	16	0.211043	S	7	7	0.08471	S	11	13	0.140315	S	10	11	0.128808		0	0	0	S	6	6	0.0610811	S	8	9	0.0864922	S	0.130441	11	9	S	8	9	0.169908	S	8	8	0.128265	S	9	10	0.181406	S	7	7
65123	INTS3	60	S	12	13	0.137471	S	7	9	0.0635205	S	9	9	0.0733167	S	13	13	0.114689		0	0	0	S	10	10	0.0498309	S	7	7	0.0588723	S	0.118922	14	12	S	20	29	0.853014	S	13	16	0.336968	S	21	33	1.17584	S	21	35
283489	CHAMP1	69	S	11	12	0.170199	S	6	7	0.0880439	S	13	16	0.188765	S	13	14	0.15637		0	0	0	S	7	9	0.0977174	S	7	8	0.0780923	S	0.173698	14	12	S	18	27	0.636314	S	16	18	0.325891	S	18	24	0.816044	S	17	23
11100	HNRNPUL1	48.2857	S	10	11	0.178406	S	6	8	0.107318	S	6	8	0.112705	S	8	8	0.106235		0	0	0	S	6	7	0.0912701	S	7	9	0.0965322	S	0.130811	9	6	S	11	18	0.80408	S	11	17	0.501302	S	12	17	0.795901	S	13	19
10155	TRIM28	45	S	10	10	0.126207	S	3	3	0.0369579	S	7	8	0.0761238	S	8	8	0.0874721		0	0	0	S	3	3	0.0225608	S	6	7	0.0532058	S	0.070236	8	8	S	14	18	0.453577	S	10	11	0.172629	S	20	36	1.36965	S	29	81
23064	SETX	136.5	S	9	9	0.0827096	S	8	8	0.05739	S	11	11	0.0717445	S	9	9	0.057677		0	0	0	S	5	5	0.0208613	S	7	7	0.0392794	S	0.0375214	5	5	S	13	15	0.119225	S	13	14	0.0799336	S	19	21	0.286531	S	19	22
55226	NAT10	58.5	S	9	9	0.109924	S	7	7	0.0528186	S	9	9	0.0687755	S	8	8	0.0595185		0	0	0	S	6	6	0.0474753	S	8	8	0.0504506	S	0.075759	9	9	S	16	19	0.434447	S	13	15	0.311295	S	16	20	0.473218	S	18	23
8243	SMC1A	87	S	9	9	0.0736717	S	4	4	0.0266222	S	5	5	0.0294851	S	10	10	0.0697127		0	0	0	S	7	7	0.0333464	S	7	7	0.0290483	S	0.0636535	9	9	S	15	16	0.172389	S	9	9	0.0761506	S	14	15	0.295741	S	23	30
1213	CLTC	33.3333	S	9	9	0.0320883	S	2	2	0.00958261	S	5	5	0.0183524	S	6	6	0.0245672		0	0	0	S	6	6	0.0152547	S	5	5	0.0208758	S	0.0396724	9	9	S	13	13	0.143999	S	11	11	0.100303	S	18	21	0.396807	S	47	65
10765	KDM5B	89.6	S	7	8	0.0446102	S	5	6	0.0384365	S	9	10	0.0491297	S	5	5	0.0255399		0	0	0	S	5	6	0.0251255	S	9	10	0.0474635	S	0.0471607	8	7	S	3	4	0.0339097	S	2	2	0.021682	S	3	5	0.0464899	S	4	5
26009	ZZZ3	39	S	7	7	0.0659369	S	4	6	0.0548185	S	4	4	0.0351833	S	3	3	0.0196889		0	0	0	S	2	3	0.022759	S	3	4	0.0257509	S	0.0409254	4	3	S	4	6	0.0764306	S	4	4	0.0563202	S	3	4	0.111924	S	6	7
100381270	ZBED6	50	S	7	7	0.134442	S	3	4	0.0423782	S	4	4	0.0682444	S	5	5	0.0728785		0	0	0	S	6	6	0.0539282	S	7	7	0.0822604	S	0.0909984	6	6	S	7	7	0.114231	S	6	7	0.0626153	S	5	6	0.0777842	S	2	2
9575	CLOCK	39	S	6	7	0.086102	S	2	2	0.0274213	S	5	5	0.0399971	S	5	5	0.0408364		0	0	0	S	4	4	0.028008	S	3	3	0.0173075	S	0.0701326	6	5	S	4	5	0.134955	S	5	5	0.0663895	S	3	4	0.0902187	S	2	3
4683	NBN	36.75	S	5	5	0.034749	S	3	3	0.0165517	S	4	4	0.0272877	S	8	8	0.0392315		0	0	0	S	4	4	0.0159503	S	3	3	0.0156016	S	0.0582184	6	6	S	21	32	1.22708	S	15	22	0.675241	S	21	30	1.28818	S	18	25
10915	TCERG1	48.8462	S	5	5	0.0472715	S	3	3	0.0215415	S	4	4	0.0329655	S	5	5	0.0470713		0	0	0	S	4	4	0.0258653	S	4	4	0.0272125	S	0.0517322	5	5	S	9	9	0.104102	S	5	6	0.0694356	S	8	8	0.124515	S	9	9
79811	SLTM	50	S	5	7	0.0696526	S	1	1	0.0058371	S	5	5	0.0330091	S	3	3	0.0262931		0	0	0	S	1	1	0.0120753	S	3	3	0.0245376	S	0.0343783	3	3	S	6	8	0.0944119	S	4	5	0.054234	S	7	8	0.14122	S	5	7
221092	HNRNPUL2	45	S	4	5	0.0573981	S	4	4	0.034393	S	4	5	0.0422713	S	3	4	0.0350349		0	0	0	S	4	5	0.0364064	S	3	4	0.0340369	S	0.0505448	5	4	S	3	4	0.0418422	S	2	2	0.0216836	S	3	3	0.0469559	S	3	3
4998	ORC1	34.6	S	3	3	0.0517595	S	6	7	0.0512043	S	5	5	0.0398186	S	4	4	0.0362321		0	0	0	S	5	5	0.0387246	S	5	5	0.0338892	S	0.0629872	6	6	S	8	10	0.271993	S	7	15	0.203318	S	7	10	0.28138	S	7	10
51592	TRIM33	53.5714	S	2	2	0.011041	S	1	1	0.00462325	S	2	2	0.0123856	S	4	4	0.0188443		0	0	0	S	2	2	0.00591649	S	2	2	0.00683593	S	0.0132543	2	2	S	7	10	0.136104	S	1	1	0.0148186	S	16	27	1.10442	S	26	54
23512	SUZ12	38.25	S	2	2	0.0145524	S	1	1	0.00318486	S	2	2	0.00878119	S	2	2	0.00712351		0	0	0	S	2	2	0.00508726	S	2	3	0.0061211	S	0.00724828	3	3	S	4	5	0.0320455	S	3	3	0.017667	S	2	2	0.02628	S	1	1
11083	DIDO1	95.5	S	12	13	0.122832	S	5	5	0.0345824	S	16	17	0.102056	S	17	20	0.183788		0	0	0	S	10	10	0.0400214	S	8	8	0.0447691	S	0.114902	14	11	S	19	19	0.273071	S	10	10	0.113219	S	26	29	0.969196	S	35	41
81857	MED25	36	S	6	7	0.126712	S	2	3	0.0637918	S	5	7	0.101888	S	4	7	0.115413		0	0	0	S	3	4	0.0805289	S	2	6	0.0483141	S	0.0745209	6	3	S	5	7	0.296626	S	4	5	0.160004	S	7	11	0.526046	S	6	8
57325	KAT14	41	S	9	9	0.140477	S	5	5	0.0620485	S	8	8	0.0904702	S	7	7	0.101554		0	0	0	S	7	7	0.0792705	S	7	8	0.0857183	S	0.113841	7	7	S	9	11	0.197906	S	3	4	0.0666118	S	4	6	0.124206	S	5	6
7799	PRDM2	64.1667	S	6	6	0.0610832	S	4	4	0.0543407	S	7	7	0.0975352	S	7	7	0.0717396		0	0	0	S	5	5	0.0568282	S	6	7	0.0499658	S	0.0861986	5	5	S	6	6	0.103724	S	6	7	0.0816997	S	8	9	0.140853	S	3	3
63035	BCORL1	88.25	S	11	11	0.127342	S	5	5	0.0510827	S	11	11	0.116133	S	8	9	0.0828109		0	0	0	S	5	6	0.0170496	S	8	9	0.0834269	S	0.0400775	4	4	S	3	3	0.0204608	S	3	3	0.0181729	S	2	2	0.00822062	S	3	3
374655	ZNF710	31.6667	S	3	4	0.12324	S	2	3	0.0824124	S	4	4	0.102402	S	3	5	0.084918		0	0	0	S	2	3	0.065444	S	3	6	0.121586	S	0.115332	3	2	S	2	2	0.0561523	S	3	3	0.0519177	S	1	1	0.0514365	R	1	1
79595	SAP130	43.3	S	7	8	0.133428	S	2	2	0.0440964	S	6	9	0.130477	S	5	8	0.0880703		0	0	0	S	5	6	0.0637593	S	5	6	0.0652213	S	0.100868	8	6	S	5	5	0.0597766	S	2	2	0.0212016	S	6	6	0.0880014	S	6	7
7916	PRRC2A	130	S	7	7	0.0437588	S	1	1	0.00711226	S	7	7	0.0328994	S	2	2	0.025524		0	0	0	S	2	2	0.0132284	S	1	1	0.00936722	S	0.026491	3	3	S	2	2	0.0312799	S	2	2	0.0229998	S	4	4	0.0401121	S	6	6
2130	EWSR1	23.6667	S	3	5	0.198648	S	2	3	0.0765687	S	2	2	0.110554	S	3	5	0.124538		0	0	0	S	3	5	0.101647	S	2	3	0.0716408	S	0.0747883	1	1	S	3	5	0.260167	S	3	3	0.0498596	S	3	5	0.303828	S	5	10
83452	RAB33B	16.5	S	1	1	0.0174613	S	1	1	0.0210049	S	1	3	0.0740273	S	1	1	0.0271248		0	0	0	S	1	1	0.021402	S	1	1		S	0.0317979	1	1	S	1	1	0.0846847	S	1	1	0.0264309	S	1	2	0.0493966	S	1	3
9126	SMC3	83	S	7	7	0.0335538	S	1	1	0.00404573	S	5	5	0.0129677	S	6	6	0.0203184		0	0	0	S	3	3	0.00978546	S	5	5	0.0172435	S	0.0270964	8	8	S	11	11	0.109325	S	5	5	0.049476	S	16	16	0.237875	S	23	25
6942	TCF20	111	S	16	16	0.236807	S	7	8	0.0851604	S	11	13	0.152628	S	6	6	0.0777617		0	0	0	S	5	5	0.0541172	S	7	9	0.0634204	S	0.0921128	8	7	S	16	19	0.411893	S	17	19	0.359972	S	14	17	0.433456	S	11	14
8161	COIL	35	S	1	1	0.0127064	S	1	1	0.00731362	S	1	1	0.011388	S	1	1	0.00262557		0	0	0	S	1	1	0.00978116	S	1	1	0.0133971	S	0.0268388	5	4	S	4	4	0.0877888	S	9	9	0.11828	S	8	8	0.221923	S	11	14
6497	SKI	40.25	S	5	6	0.12381	S	3	3	0.0884097	S	4	4	0.0571898	S	6	6	0.0517981		0	0	0	S	5	5	0.0373299	S	6	6	0.0672839	S	0.109226	7	7	S	2	2	0.0738213	S	2	2	0.0511498	S	4	4	0.0917197	S	1	1
81624	DIAPH3	59.9231	S	1	2	0.0302473	S	1	2	0.0227483	S	1	2	0.0248973	S	1	2	0.030369		0	0	0	S	1	2	0.017868	S	1	2	0.0259411	S	0.029039	2	1	S	1	1	0.0378039	S	1	1	0.0291064	S	1	2	0.045869	S	2	3
64919	BCL11B	50.5	S	3	3	0.0394724	S	2	2	0.016345	S	3	3	0.0279631	S	1	1	0.0100978		0	0	0	S	3	3	0.0246817	S	2	3	0.0136671	S	0.036616	3	3	S	3	3	0.0425079	S	5	7	0.0691623	S	4	4	0.0441859	R	1	1
84083	ZRANB3	56.75	S	5	6	0.0528672	S	2	2	0.0231494	S	1	2	0.0134259	S	2	2	0.027061		0	0	0	S	2	2	0.0222294	S	3	3	0.0317956	S	0.0404612	4	4	S	6	6	0.0898821	S	4	4	0.0642504	S	2	2	0.0338611	S	3	3
54904	NSD3	58.5	S	4	4	0.0284175	S	2	2	0.0187565	S	4	4	0.035578	S	3	3	0.0171657		0	0	0	A	1	1	0.00267275	S	2	2	0.0149422	S	0.043674	6	4	S	2	2	0.0302184	S	3	3	0.0306604	S	5	5	0.0898277	S	5	5
3981	LIG4	56.25	S	3	3	0.0253954	S	2	2	0.0154054	S	1	1	0.00245985	S	2	2	0.0124017		0	0	0	S	1	1	0.00379219	R	1	1	0.00384945	S	0.0190505	2	2	S	18	35	1.00362	S	18	32	0.681416	S	13	23	0.674794	S	14	21
2033	EP300	105	S	9	10	0.0835624	S	4	4	0.0197509	S	13	14	0.126958	S	13	15	0.156129		0	0	0	S	5	5	0.0284027	S	6	7	0.0383251	S	0.0674867	9	8	S	7	7	0.0659177	S	6	6	0.0425614	S	8	9	0.138284	S	3	4
51317	PHF21A	42.9	S	4	4	0.0424317	S	3	3	0.0196269	S	3	4	0.0138289	S	2	2	0.0140954		0	0	0	S	2	2	0.0103011	A	1	1	0.00626768	S	0.0101534	1	1	S	4	6	0.086127	S	3	3	0.0503046	S	5	7	0.107514	S	5	6
9013	TAF1C	33.5833	S	8	8	0.0412425	S	2	2	0.00732095	S	3	3	0.014494	S	4	4	0.0177736		0	0	0	S	3	3	0.0116689	S	4	4	0.0143093	S	0.0173969	4	4	S	5	5	0.0706091	S	5	5	0.044842	S	8	8	0.0898706	S	4	4
2011	MARK2	35.3529	S	2	3	0.012384	S	1	3	0.0131246	S	2	4	0.0246472	S	2	3	0.0227604		0	0	0	S	1	2	0.0124786	S	3	4	0.0285343	S	0.02883	6	4	S	3	3	0.0544652	S	1	1	0.00597752	S	3	3	0.0261441	S	7	7
10147	SUGP2	64	S	3	3	0.0103758	S	1	1	0.00471104	R	2	2	0.00726053	S	2	2	0.00872323		0	0	0	R	2	2	0.00537503	A	1	1	0.00545469	S	0.0122914	3	3	S	1	1	0.00671605	S	1	1	0.00394981	S	2	2	0.0172705	S	5	5
114785	MBD6	30.3333	S	2	2	0.0460393	R	3	3	0.0525746	S	2	2	0.0426142	S	3	3	0.0467448		0	0	0	S	3	3	0.0397655	S	3	3	0.0316969	S	0.0158847	2	2	S	4	6	0.109269	S	3	5	0.0654663	S	5	6	0.157788	S	3	3
4605	MYBL2	43	S	2	2	0.0178214	R	2	2	0.0200744	S	2	3	0.0224267	A	1	1	0.00883127		0	0	0	S	2	2	0.0154333	R	2	2	0.01258	R	0.0275354	3	3	S	4	4	0.0597086	S	5	5	0.0643023	S	5	5	0.0827981	R	2	2
55809	TRERF1	61.5	S	7	7	0.0582043	R	1	1	0.0116454	S	5	5	0.0363459	S	3	3	0.0177662		0	0	0	S	3	3	0.0184613	S	4	4	0.0227115	S	0.0361526	5	5	S	3	3	0.0357268	S	3	3	0.0319355	S	2	2	0.0362995	S	3	3
23524	SRRM2	113.333	S	4	4	0.0268574	R	2	2	0.0128207	S	4	4	0.0231876	S	4	4	0.0270788		0	0	0	S	3	3	0.013195	S	6	6	0.0252959	S	0.0385825	5	5	S	6	10	0.124525	S	4	5	0.0186967	S	9	14	0.366371	S	13	22
23013	SPEN	217	S	3	3	0.0240374	R	1	1	0.00474155	S	2	2	0.00737931	S	5	5	0.0183234		0	0	0	S	2	2	0.00735202	A	1	1		S	0.00787627	3	3	S	5	5	0.0287871	S	4	4	0.0175203	S	6	6	0.075522	S	2	2
5927	KDM5A	101	S	3	3	0.0134614	R	3	3	0.011218	S	2	2	0.00716395	S	4	4	0.0181235		0	0	0	R	1	1	0.00216846	R	3	3	0.012291	S	0.0120562	3	3	S	13	13	0.13246	S	8	8	0.0874535	S	10	10	0.156083	S	7	7
5976	UPF1	67	S	2	2	0.00590781	R	1	1	0.00175796	S	2	2	0.004611	S	3	3	0.00721407		0	0	0	R	2	2	0.00308056	R	1	1	0.00130335	R	0.00213925	1	1	S	2	2	0.0102873	S	2	2	0.00768565	S	5	5	0.0577116	S	13	13
25885	POLR1A	112	S	3	3	0.00967598	R	1	1		R	2	2	0.00735214	S	2	2	0.0067585		0	0	0	S	1	1	0.00302832	A	1	1	0.00378582	S	0.00927289	3	3	S	62	112	5.00988	S	64	111	4.34614	S	62	105	5.67792	S	55	96
6314	ATXN7	49.3333	S	4	4	0.0222635	A	1	2	0.00709584	S	5	5	0.01563	S	3	3	0.0153391		0	0	0	S	3	4	0.00768806	S	2	3	0.0104604	S	0.0134604	5	4	S	10	17	0.201499	S	8	13	0.119874	S	10	16	0.278789	S	8	12
57508	INTS2	60	S	3	4	0.0232656	A	1	1	0.00682012	S	2	2	0.00964149	R	2	2	0.00937786		0	0	0	R	1	1	0.0115302	S	1	1	0.0047618	S	0.00612698	2	2	S	8	8	0.235397	S	5	5	0.127257	S	12	13	0.374372	S	14	17
57713	SFMBT2	48	S	4	5	0.0322518	A	1	1	0.00178772	S	2	2	0.00814723	S	2	2	0.00536583		0	0	0	S	2	2	0.00970201	S	3	3	0.0115079	S	0.0121379	2	2	S	11	15	0.301211	S	8	13	0.162043	S	8	10	0.238974	S	6	8
79830	ZMYM1	61.2	S	3	4	0.0489039	S	4	4	0.0181356	S	4	5	0.0346273	S	4	5	0.0354907		0	0	0	S	3	3	0.0154138	S	5	6	0.0325327	S	0.0458739	5	4	S	5	7	0.143448	S	4	6	0.0490544	S	6	7	0.084835	S	5	5
3191	HNRNPL	26.4286	S	1	1	0.0154569	S	2	2	0.0259918	S	2	2	0.0311891	S	3	3	0.0264313		0	0	0	S	2	2	0.0279645	S	2	2	0.0392331	S	0.0405045	2	2	S	5	6	0.0980007	S	4	5	0.0810117	S	4	5	0.115159	S	11	17
2309	FOXO3	24.5	S	1	1	0.0136215	S	2	2	0.0159968	S	3	3	0.12177	S	2	2	0.0219148		0	0	0	S	1	1	0.00368843	S	3	3	0.0411228	S	0.0282832	2	2	S	6	6	0.106118	S	3	3	0.0517759	S	3	3	0.0556828	S	4	4
4298	MLLT1	27.2	R	1	1	0.00470588	S	1	1	0.00396168	S	1	1	0.0190202	S	1	1	0.0143126		0	0	0	S	2	2	0.00394277	S	1	1	0.00374029	S	0.00650314	2	2	S	1	1	0.0102793	S	3	5	0.0196315	S	2	3	0.0765538	S	1	1
163	AP2B1	51.25	R	4	4	0.0238505	S	3	3	0.0117221	R	4	4	0.0196812	R	5	5	0.0344015		0	0	0	S	4	4	0.018035	R	5	5	0.0218584	S	0.0570258	6	6	S	6	6	0.0782255	S	2	2	0.0345111	S	12	16	0.346134	S	21	31
440348	NPIPB15	23	A	1	1	0.0776822	R	1	1	0.0530509	R	1	1	0.0799739	R	1	1	0.0382328		0	0	0	R	1	1	0.0531029	R	1	1	0.0628709	S	0.0537662	1	1	S	1	2	0.241704	S	1	2	0.165928	S	1	2	0.237027	R	1	2
51602	NOP58	30	A	1	1	0.000716741	R	1	1	0.00534637	S	2	2	0.0117998	R	1	2	0.00932041		0	0	0	R	1	1	0.00679456	R	1	1	0.00883665	S	0.0115918	1	1	S	9	12	0.41818	S	9	15	0.38089	S	10	21	0.807945	S	13	26
10987	COPS5	21	A	1	2	0.0643775	A	1	1	0.00726095	R	1	1	0.0171448	R	1	2	0.0582647		0	0	0	A	1	2	0.0458551	R	1	1	0.0383195	R	0.0505309	2	1	S	1	1	0.0161877	S	1	2	0.0246377	S	1	1	0.0316092	S	3	4
64412	GZF1	48	S	2	2	0.0434767	S	3	3	0.0364204	S	6	6	0.0521604	S	5	6	0.0628243		0	0	0	S	6	6	0.0452719	S	5	5	0.0468829	S	0.0726896	7	7	S	2	2	0.0285726	S	2	2	0.0211752	S	2	2	0.0327404		0	0
161882	ZFPM1	57.6	S	5	5	0.0642874	S	2	2	0.0347544	S	3	3	0.0346502	S	7	7	0.0372186		0	0	0	S	3	3	0.0318776	S	4	5	0.0444717	S	0.0608968	7	5	S	2	2	0.0143231	S	3	3	0.0127743	S	2	2	0.00948112	S	3	3
80314	EPC1	39	S	1	1	0.00568893	S	2	2	0.00579692	S	1	1	0.00276058	S	2	2	0.00766474		0	0	0	S	2	2	0.00469811	S	1	1	0.00313356	S	0.0274149	4	4	S	1	1	0.00478599	S	2	3	0.0107575	S	8	9	0.0753472	S	3	3
7750	ZMYM2	66.2222	S	4	4	0.0167878	S	2	2	0.00481056	S	1	1	0.00609581	S	3	3	0.0126333		0	0	0	S	2	2	0.00667409	S	1	1	0.00246159	S	0.0279526	5	5	S	1	2	0.0187177	S	1	1	0.0075087	S	5	6	0.068494	S	8	8
29894	CPSF1	88	S	4	4	0.01282	R	2	2	0.00101065	S	4	4	0.00906145	S	4	4	0.0125331		0	0	0	R	2	2	0.00716165	S	2	2	0.00405369	S	0.0214751	5	5	S	2	2	0.00485957	S	1	1	0.00723331	S	2	2	0.0223998	S	10	11
84464	SLX4	92.6667	R	2	2	0.0213274	R	1	1		S	1	1	0.00758158	S	2	2	0.0100993		0	0	0	A	1	1	0.00652027	S	1	1	0.00656334	S	0.0122838	1	1	S	3	3	0.0456717	S	1	1	0.0202511	S	8	8	0.125667	S	7	7
84146	ZNF644	54.3333	S	4	4	0.0187415	S	2	2	0.0148607	S	3	3	0.0197711	S	2	2	0.00902702		0	0	0	S	2	2	0.00640202	S	2	2	0.0100846	S	0.0196756	5	4	S	5	5	0.0372382	S	2	2	0.0103053	S	2	2	0.017491	S	2	2
56987	BBX	45.8	S	3	3	0.0196167	S	1	1	0.007664	S	2	2	0.00979168	S	1	1	0.00807886		0	0	0	S	2	2	0.00853873	S	1	1	0.00675006	S	0.012218	2	2	S	1	1	0.00258928	S	1	1	0.00192769	S	2	3	0.0344568	S	5	5
84629	TNRC18	148.9	S	3	3	0.0148023	R	1	1	0.00381262	S	3	3	0.0114377	S	5	5	0.0276461		0	0	0	S	3	3	0.00833354	S	5	6	0.0307494	S	0.0229406	4	4	S	1	1	0.00561679	S	1	1	0.00531522	S	1	1	0.0089743	A	1	1
58517	RBM25	31.5	S	1	1	0.00318822	S	1	1	0.00210384	S	1	1	0.00190876	S	1	1	0.00298949		0	0	0	S	1	1	0.00152382	S	1	1	0.00237888	S	0.00504534	1	1	S	2	3	0.0214763	S	1	1	0.00271569	S	4	4	0.0645036	S	8	11
55777	MBD5	76.1667	S	2	2	0.0213288	S	3	3	0.0193504	S	4	4	0.0273249	S	3	3	0.022824		0	0	0	S	2	2	0.0111506	S	2	2	0.00643676	S	0.0140703	3	3	S	1	1	0.0120942	S	2	2	0.0139721	S	1	1	0.014511		0	0
5978	REST	61	S	8	8	0.131362	S	2	2	0.0138388	R	4	4	0.0515519	S	2	2	0.0182712		0	0	0	S	2	2	0.0136457	A	1	1	0.0260194	S	0.0512503	3	2	S	1	1	0.0322778	S	1	1	0.0255252	S	1	1	0.0318821		0	0
10129	FRY	152	S	1	2	0.0507098	R	1	2	0.0366709	R	1	2	0.0357268	S	1	2	0.0438558		0	0	0	R	1	1	0.0190033	R	1	2	0.038512	R	0.0369047	2	1	S	1	1	0.0261644	S	1	1	0.0147504		0	0	0	S	1	1
83732	RIOK1	30.6667	R	1	2	0.214254	S	1	4	0.168558	R	1	2	0.136188	S	1	4	0.179635		0	0	0	S	1	3	0.102361	S	1	3	0.133579	S	0.150046	3	1	S	1	1		S	1	2	0.0348015		0	0	0	A	1	1
3097	HIVEP2	135	S	7	8	0.0539899	S	4	4	0.0287247	S	8	8	0.0481225	S	5	5	0.031442		0	0	0	S	3	3	0.012725	S	7	8	0.0353055	S	0.0344575	6	6	S	1	1	0.00410675	S	1	1	0.000847554		0	0	0		0	0
57623	ZFAT	62	S	4	4	0.0670057	S	4	5	0.0334533	S	4	4	0.0448501	S	4	4	0.0377308		0	0	0	S	3	3	0.0140476	S	4	4	0.0297508	S	0.03927	3	3	S	1	1	0.0160138	S	1	1	0.00963614		0	0	0		0	0
6595	SMARCA2	43.6667	S	11	12	0.0737169	S	9	9	0.0296551	S	7	7	0.0306766	S	8	9	0.0465533		0	0	0	S	6	6	0.0197462	S	4	4	0.00267704	S	0.0322565	7	7	S	6	6	0.0227613	A	2	2	0	A	8	10	0	S	15	24
57649	PHF12	44.7778	S	2	2	0.0182359	S	2	2	0.0131061	R	2	2	0.0101534	S	4	4	0.0215372		0	0	0	S	2	2	0.00831848	S	3	3	0.020401	S	0.0290378	4	4	S	2	3	0.0527348		0	0	0	S	5	7	0.115538	S	8	8
6599	SMARCC1	61.5	S	8	8	0.104083	S	8	9	0.0621705	S	8	9	0.0717059	S	9	11	0.0971036		0	0	0	S	7	7	0.0360094	S	7	8	0.0672164	S	0.0952443	10	9	S	3	4	0.020259		0	0	0	S	3	4	0.00840952	S	7	9
3609	ILF3	42.1111	S	2	2	0.0129736	S	2	2	0.00839302	S	3	4	0.0167335	S	3	4	0.0244926		0	0	0	S	1	1	0.00664287	R	2	2	0.00905893	S	0.0181921	3	3	S	1	1	0.00863319		0	0	0	S	1	1	0.00622883	S	7	11
9919	SEC16A	108.556	S	5	5	0.0325461	S	2	2	0.011478	S	6	6	0.027885	S	4	4	0.024363		0	0	0	S	5	5	0.0141485	S	3	3	0.0111556	S	0.0404101	6	6	S	1	1	0.0105169		0	0	0	S	7	7	0.0948995	S	10	13
26115	TANC2	97.0714	S	7	7	0.0332846	S	4	4	0.0152437	S	4	4	0.0195074	S	3	3	0.0187078		0	0	0	S	3	3	0.00664429	S	6	6	0.0203665	S	0.027194	5	5	S	1	1	0.00345056		0	0	0	S	8	8	0.0728358	S	8	8
23020	SNRNP200	134	S	2	2	0.00527782	R	1	1	0.00283699	S	2	3	0.015081	S	1	1	0.00307381		0	0	0	R	1	1	0.00284732	S	2	2	0.0119961	S	0.0128209	3	3	S	3	3	0.31597		0	0	0	S	16	16	0.191004	S	31	37
729830	FAM160A1	46	S	1	1	0.00224918	A	1	1	0.00101065	S	1	1	0.0016847	S	1	1	0.00172879		0	0	0	R	1	1	0.0010769	S	1	1	0.00112732	S	0.00205056	1	1	S	1	1	0.00245635		0	0	0	S	1	1	0.00364988	S	1	1
81608	FIP1L1	25.85	S	3	3	0.0281872	S	1	1	0.00864585	S	2	2	0.0246009	R	1	1	0.00284979		0	0	0	R	1	1	0.0104632	S	2	2	0.0205442	S	0.0359016	3	3	S	1	1	0.0018459		0	0	0	S	1	1	0.0310828	S	5	6
5926	ARID4A	49.5	S	3	3	0.0289083	R	2	2	0.00828407	S	4	4	0.0218521	S	3	3	0.0164959		0	0	0	S	2	2	0.00733208	S	3	3	0.0101407	S	0.0343286	6	6	S	1	1	0.00165841		0	0	0	S	1	1	0.00204976	S	1	2
9412	MED21	4.5	S	1	1	0.0300395	S	1	1	0.0331103	S	2	3	0.0807993	S	1	2	0.0222781		0	0	0	S	1	1	0.0437573	S	1	1	0.0347543	S	0.0367005	1	1	S	1	1	0.0123222		0	0	0	S	1	2	0.0682338	S	1	1
6046	BRD2	38.5	S	6	8	0.0998806	S	4	4	0.0607621	S	7	7	0.0789622	S	7	7	0.0896051		0	0	0	S	3	3	0.0144407	S	4	4	0.0395036	S	0.0714313	4	4	S	1	1	0.00996812		0	0	0		0	0	0		0	0
9726	ZNF646	110	S	9	9	0.0946055	S	4	4	0.0377228	S	9	9	0.35876	S	5	6	0.0532216		0	0	0	S	4	4	0.0315754	S	6	6	0.277971	S	0.0612895	7	6		0	0	0	S	1	1	0.00256548	S	1	1	0.00328639		0	0
57659	ZBTB4	47	S	3	3	0.0433591	S	5	5	0.0238997	S	3	3	0.0302312	S	4	4	0.0416497		0	0	0	S	3	3	0.024425	S	4	4	0.0365933	S	0.0495576	5	5		0	0	0	S	1	1	0.00234015		0	0	0	S	2	2
10499	NCOA2	67	S	7	7	0.0827216	S	2	2	0.018169	S	9	10	0.133802	S	8	8	0.141684		0	0	0	S	5	5	0.0381813	S	3	3	0.0240687	S	0.0297735	2	2		0	0	0		0	0	0	S	1	1	0.0076584	S	2	3
8289	ARID1A	102	S	4	4	0.0197609	S	1	1	0.00234265	S	3	3	0.0118825	S	4	4	0.0204678		0	0	0	S	3	3	0.00828805	R	1	1	0.00277827	S	0.0097272	3	3		0	0	0		0	0	0	S	1	1		S	3	3
254251	LCORL	46.3846	R	3	3	0.016637	A	1	1	0.00514144	S	4	4	0.0279396	S	3	3	0.0173297		0	0	0	S	2	2	0.0104978	S	4	4	0.0371434	S	0.0342608	5	5		0	0	0		0	0	0		0	0	0		0	0
405	ARNT	42.3636	S	7	10	0.20203	S	7	9	0.109714	S	7	8	0.0982903	S	7	8	0.077046		0	0	0	S	6	8	0.0827269	S	7	11	0.100702	S	0.0732291	9	7		0	0	0		0	0	0		0	0	0		0	0
3933	LCN1	15.75	S	2	2	0.0294709	S	1	1	0.00695963	S	2	2	0.0246087	S	1	1	0.0061465		0	0	0	S	1	1	0.00856853	S	1	1	0.0082643	S	0.00731329	1	1		0	0	0		0	0	0		0	0	0		0	0
64067	NPAS3	46.75	S	2	2	0.00957374	S	2	2	0.00696683	S	2	3	0.0173419	R	2	2	0.00629711		0	0	0	S	1	1	0.00395108	S	1	1	0.00463603	S	0.00729237	1	1		0	0	0		0	0	0		0	0	0		0	0
27245	AHDC1	85	S	2	2	0.0100029	R	1	1	0.00352784	S	1	1	0.00333621	R	1	1	0.00430664		0	0	0	R	2	2	0.00556	S	2	2	0.00498965	S	0.00895163	2	2		0	0	0		0	0	0		0	0	0		0	0
2896	GRN	29	S	1	1	0.00424347	S	1	1	0.00375508	S	1	1	0.00433369	S	1	1	0.00330437		0	0	0	S	1	1	0.00320604	S	1	1	0.00513831	S	0.00876104	2	2		0	0	0		0	0	0		0	0	0		0	0
23389	MED13L	102.8	S	3	3	0.0200109	S	1	1	0.00713364	S	4	4	0.0342396	S	3	3	0.0224387		0	0	0	S	2	2	0.00945186	S	2	2	0.00884765		0	0	0	S	4	4	0.0404604	S	2	2	0.00750939	S	7	7	0.16222	S	3	3
9361	LONP1	46.75	R	1	1	0.0212738	S	1	2	0.0160574	R	1	1	0.00519658	S	1	2	0.0224741		0	0	0	S	1	1	0.0139957	S	1	2	0.0211325		0	0	0	S	1	2	0.0351987	S	1	2	0.0166705	S	1	2	0.0481845	S	1	1
5782	PTPN12	44.2	R	1	1	0.00774306	R	1	1	0.00472132	S	1	1	0.00673195	S	1	1	0.00562561		0	0	0	R	1	1	0.00723871	S	1	1	0.00575451		0	0	0	S	1	1	0.00870173	S	1	1	0.00346638		0	0	0		0	0
254394	MCM9	52	S	1	1	0.0046356	S	1	1	0.00205506	S	1	1	0.0033143	S	1	1	0.00476862		0	0	0	S	1	1	0.00281859		0	0	0	S	0.00379248	1	1	S	3	3	0.0471165	S	2	2	0.0239166	S	3	3	0.0297082	S	1	1
55536	CDCA7L	26.6667	S	1	1	0.0072599	S	1	1	0.00671738	S	1	1	0.00825426	S	1	1	0.00503549		0	0	0	S	2	2	0.0144994		0	0	0	S	0.00763451	1	1	S	3	3	0.039053	S	3	3	0.0471787	S	4	4	0.0487166	S	1	1
4205	MEF2A	17.4737	S	2	2	0.0264528	R	1	1	0.0189592	S	4	4	0.0484467	R	1	1	0.0212443		0	0	0	R	1	1	0.00756317		0	0	0	S	0.021334	1	1	S	1	1	0.0228039	S	1	1	0.024206	S	1	1	0.0221816	S	2	2
10992	SF3B2	57	S	1	1	0.00522597	S	2	2	0.0105629	S	2	2	0.00657956	S	3	3	0.0166419		0	0	0	A	1	1	0.00220941		0	0	0	S	0.0174837	3	3	S	1	1	0.00395064		0	0	0	S	2	2	0.0247597	S	12	18
27107	ZBTB11	49	S	1	1	0.00832413	S	1	1	0.00738611	A	1	1	0.00204853	S	1	1	0.00437639		0	0	0	S	2	2	0.00937978		0	0	0	S	0.0029865	1	1		0	0	0		0	0	0	S	1	1	0.00731592		0	0
5411	PNN	44	R	2	2	0.0112662	S	2	2	0.0101871	R	1	1	0.00736849	S	1	1	0.00817952		0	0	0	S	1	1	0.00516608		0	0	0	S	0.0111828	1	1		0	0	0		0	0	0	S	1	1	0.00160068	S	1	1
220388	CCDC89	30	S	1	1	0.0114371	A	1	1	0.00854148	R	1	1	0.00988698	A	1	1	0.00297514		0	0	0	A	1	1	0.0124492		0	0	0	A	0.0110839	1	1		0	0	0		0	0	0		0	0	0		0	0
23386	NUDCD3	20.5	A	1	1	0.0256415	R	1	1	0.0148588	R	1	1	0.015344	S	1	1	0.0204141		0	0	0	R	1	1	0.01221		0	0	0		0	0	0	S	1	1	0.0128375	S	1	1	0.0060411	S	1	1	0.00859357	R	1	1
25836	NIPBL	134.6	S	2	2	0.0119659	S	2	2	0.00791498	S	1	1	0.00295223		0	0	0		0	0	0	A	1	1		S	2	2	0.00543268	A	0.00172397	1	1	S	3	3	0.0174061	S	4	4	0.0176882	S	7	7	0.0844139	S	6	6
573	BAG1	16.25	A	1	1	0.00442168	A	1	1	0.00708034	R	1	1	0.00795987		0	0	0		0	0	0	R	1	1	0.00757316	R	1	1	0.0108588	S	0.0143195	2	1	S	1	1	0.00416293		0	0	0	S	2	2	0.0259316	R	1	1
64425	POLR1E	23.5	S	5	5	0.0259297	R	1	1	0.00374652	S	1	1	0.00858302		0	0	0		0	0	0	S	1	1	0.0045181	S	1	1	0.00428007		0	0	0	S	17	31	2.04285	S	18	33	2.57116	S	18	30	2.53516	S	18	26
10791	VAMP5	8	S	1	2	0.102926	S	1	1	0.0486677	S	1	1	0.0785294		0	0	0		0	0	0	S	1	2	0.0458335	S	1	2	0.063745		0	0	0	S	1	2	0.0771834	S	1	1	0.0303806	S	1	1	0.102674	S	1	2
3189	HNRNPH3	14.8571	S	2	2	0.0105808	R	1	1	0.00313999	S	1	1	0.00470924		0	0	0		0	0	0	R	1	1	0.00268093		0	0	0	S	0.00330264	1	1	S	3	4	0.0403811	S	1	1	0.00451271	S	3	4	0.0450466	S	2	3
23476	BRD4	47	S	3	4	0.0273293	S	2	2	0.00906028	S	3	3	0.0181097	S	6	6	0.0199412		0	0	0	A	1	1	0	S	2	2	0.00862244	S	0.0183789	3	3	S	2	2	0.0300121	S	2	2	0.0194267	S	3	4	0.0873313	S	4	4
1387	CREBBP	98.875	S	6	7	0.0320837	S	3	3	0.0158533	S	11	12	0.0572696	S	10	11	0.0589118		0	0	0	A	1	1	0	S	4	5	0.010587	A	0	4	3	A	2	2	0	A	2	2	0	S	3	3	0.00889075	R	2	2
196374	KRT78	32.3333	S	2	2	0.00484325	A	1	1	0.0136332	S	8	14	0.235919	A	1	2	0		0	0	0	A	1	2	0	S	4	5	0.0211969	A	0	2	2	S	2	2	0.00619291		0	0	0	A	1	1	0		0	0
5934	RBL2	64.8	S	3	3	0.0197838	S	1	1	0.00732561	S	1	1	0.00732553	S	2	2	0.012755		0	0	0		0	0	0	S	2	2	0.0101631	S	0.0301232	6	6	S	5	5	0.0504243	S	3	3	0.0239461	S	6	6	0.0819169	S	5	5
4627	MYH9	130	S	6	6	0.0326834	S	1	1	0.00397036	S	5	5	0.0213288	S	4	4	0.0226021		0	0	0		0	0	0	S	3	3	0.0117359	S	0.0258362	5	5	S	3	3	0.0264432	S	8	9	0.0662871	S	4	4	0.0273503	S	19	19
23309	SIN3B	56.75	S	2	2	0.00902978	R	2	2	0.00544062	S	1	1	0.00364841	R	2	2	0.0095198		0	0	0		0	0	0	S	2	2	0.00708667	S	0.0153887	4	4	S	1	1	0.0231071	S	2	2	0.0276471	S	3	3	0.0591356	S	5	5
10131	TRAP1	43.6667	S	1	1	0.00440084	S	1	1	0.0104975	S	1	1	0.00979885	S	1	1	0.00720226		0	0	0		0	0	0	S	1	1	0.0138382	S	0.0163834	1	1	S	1	2	0.123011	S	1	2	0.0596442	S	6	8	0.196121	S	16	25
2353	FOS	16	R	2	2	0.0513923	S	2	2	0.0309677	S	1	1	0.0260232	R	1	1	0.0224712		0	0	0		0	0	0	R	1	1	0.0234446	S	0.0230892	1	1	S	1	1	0.0545718	S	1	1	0.0627302		0	0	0	S	1	1
1828	DSG1	53	S	4	4	0.0469836	S	3	4	0.0215926	S	16	33	1.36026	S	3	5	0.0183971		0	0	0		0	0	0	S	4	5	0.0431661	A	0.0128819	2	2	S	1	1	0.00945126	S	1	1	0.0058526		0	0	0	S	2	2
29890	RBM15B	59	R	2	2	0.0122813	A	1	2	0.0198228	R	1	1	0.0025338	S	2	2	0.0105142		0	0	0		0	0	0	S	2	2	0.00760613	S	0.0225875	3	3	S	4	4	0.0294066	A	1	1	0	S	4	5	0.0770744	S	6	6
23199	GSE1	83.3333	A	1	1	0.00592334	S	1	1	0.00355423	A	2	2	0.00527972	R	1	1	0.0021133		0	0	0		0	0	0	A	1	1	0.00331897	R	0.00594751	1	1	S	1	1	0.00513822		0	0	0	S	4	4	0.0300112	S	7	7
79784	MYH14	130.4	S	5	5	0.0189598	R	1	1	0.00505414	S	5	5	0.00952123	S	4	4	0.0116153		0	0	0		0	0	0	R	3	3	0.00450501	S	0.0150849	3	3	A	1	1	0	A	1	2	0		0	0	0	S	6	6
54845	ESRP1	43.1429	S	1	1	0.00740799	S	1	1	0.00621152	S	1	1	0.0130867	S	1	1	0.00665798		0	0	0		0	0	0	S	1	1	0.0108786	S	0.0110116	1	1		0	0	0		0	0	0	S	1	1	0.0421489	S	4	4
23243	ANKRD28	39.9286	S	1	1	0.00551798	S	1	1	0.00378645	S	1	1	0.00380276	S	2	2	0.0103097		0	0	0		0	0	0	S	1	1	0.00401831	S	0.0189752	3	3		0	0	0		0	0	0		0	0	0		0	0
5783	PTPN13	144.909	S	1	1	0.00317781	S	1	1	0.00370533	S	2	2	0.00512534	S	1	1	0.00177756		0	0	0		0	0	0	S	1	1	0.00160468	S	0.00115605	1	1		0	0	0		0	0	0		0	0	0		0	0
11056	DDX52	29.5	S	3	3	0.0174239	S	1	1	0.00531996	S	2	2	0.0122848	S	3	3	0.0127584		0	0	0		0	0	0		0	0	0	R	0.00594916	1	1	S	4	5	0.0544062	S	4	4	0.0395032	S	10	13	0.2087	S	6	8
9276	COPB2	50	A	1	1	0.00171161	A	1	1		A	1	1	0.00245571	R	2	2	0.00725052		0	0	0		0	0	0		0	0	0	R	0.00739537	2	2	S	5	6	0.0806703	S	1	2	0.0103344	S	16	17	0.702222	S	24	30
22870	PPP6R1	40	S	1	1	0.00633776	S	1	1	0.00506925	S	1	1	0.00376187	S	1	1	0.00293365		0	0	0		0	0	0		0	0	0	R	0.00382507	1	1	S	1	1			0	0	0		0	0	0		0	0
22980	TCF25	37.3158	S	3	3	0.0124571	S	1	1	0.00484027	S	2	2	0.0098509	S	1	1	0.00604793		0	0	0		0	0	0		0	0	0	S	0.0104176	1	1		0	0	0		0	0	0	S	6	7	0.115194	S	6	10
27125	AFF4	62.6667	S	1	1	0.00790353	R	1	1	0.00477823	S	1	1	0.00556186		0	0	0		0	0	0		0	0	0	A	1	1	0.00336712	A	0.00505627	1	1	S	5	6	0.0770999	S	5	6	0.074866	S	6	7	0.142354	S	7	8
23469	PHF3	99.8	S	4	4	0.0156696	A	1	1	0.00401852	A	1	1	0.00134688		0	0	0		0	0	0		0	0	0	S	1	1	0.00211275	S	0.01107	3	3	S	2	2	0.0342643	S	3	3	0.0215058	S	6	7	0.166512	S	6	6
6279	S100A8	8.5	S	1	1	0.00674061	R	1	1	0.002119	R	1	1	0.00567519		0	0	0		0	0	0		0	0	0	S	1	1	0.00179386	R	0.00229802	1	1		0	0	0		0	0	0		0	0	0		0	0
6210	RPS15A	10	S	1	1	0.00374004	S	1	1	0.00267455	A	1	1	0.00227571		0	0	0		0	0	0		0	0	0		0	0	0	S	0.00390239	1	1	S	3	3	0.0713037		0	0	0		0	0	0	S	5	7
10523	CHERP	44	R	1	1	0.0148225	R	1	1	0.0013244	R	1	1	0.000803122		0	0	0		0	0	0		0	0	0		0	0	0	R	0.00104221	1	1		0	0	0	S	1	1	0.0025743		0	0	0	S	2	2
1123	CHN1	30.3333	R	2	2	0.00790555	S	1	1	0.00407306	R	1	1	0.000701166		0	0	0		0	0	0		0	0	0		0	0	0	S	0.00361944	1	1		0	0	0		0	0	0		0	0	0		0	0
6667	SP1	20.6667	S	3	3	0.0733583	S	2	2	0.0252235	S	1	1	0.0243433		0	0	0		0	0	0		0	0	0		0	0	0		0	0	0	S	1	1	0.0139885		0	0	0	S	2	3	0.121438	S	5	6
6431	SRSF6	20	S	3	3	0.0157449	S	2	2	0.0151461	S	1	1	0.00380971	S	2	2	0.00833496	S	2	2	0.0101886	S	2	2	0.0164892	S	2	2	0.00939121	S	0.0145045	3	3	A	1	1	0	S	1	1	0.00554013	A	1	1	0	S	4	5
7067	THRA	29.3333	S	3	3	0.0586033	S	2	2	0.0424396	S	1	1	0.0177105	S	3	3	0.0369513	S	3	3	0.0554391	S	2	2	0.0449337	S	2	2	0.0469819	S	0.0139395	1	1	S	1	1	0.0180791	S	1	1	0.0172014	A	1	1	0		0	0
1973	EIF4A1	23.5	S	3	4	0.0164197	S	2	2	0.00984591	S	2	2	0.0146381	S	2	2	0.0129626	S	4	4	0.0319999	S	3	3	0.00788597	S	2	2	0.0108811	S	0.0145111	3	2	S	9	14	0.352875	S	6	7	0.101445	S	16	32	2.43598	S	24	80
56893	UBQLN4	20.75	R	2	2	0.0214535	S	2	2	0.0184762	R	1	1	0.0548559	S	1	1	0.00805056	S	1	1	0.00549484	R	1	1	0.00986867	S	2	2	0.0264208	S	0.027792	2	2	S	1	1	0.00688666	S	2	2	0.0254319	S	2	2	0.0372198	S	4	4
51441	YTHDF2	24.5	S	1	1	0.00981594	S	1	1	0.00892853	R	2	2	0.00640234	S	3	3	0.0159908		0	0	0	S	2	2	0.00417349	S	2	2	0.0198606	S	0.0121541	1	1	S	2	2	0.0398917	S	2	2	0.046223	S	4	4	0.0885825	S	4	4
440686	HIST2H3PS2	8	S	3	5	0.590806	S	3	7	0.674633	A	1	2	0	S	2	4	0.397978	A	3	3	0	S	3	4	0.812944	S	2	4	0.602395	S	0.649287	4	3	S	3	5	0.628614	S	4	6	0.624428	A	2	4	0	S	3	5
55257	MRGBP	11	S	1	1	0.0270794	S	1	1	0.0231989		0	0	0	A	1	1	0.0148247	S	1	1	0.0297218	S	1	1	0.0251615	S	1	1	0.0295111	S	0.029004	1	1	S	2	4	0.0988004	S	2	2	0.0520827	S	1	3	0.0972678	S	1	2
6135	RPL11	10	S	1	1	0.0102742	S	2	2	0.0133748		0	0	0	S	1	1	0.0083481	S	2	2	0.0139971	S	1	1	0.0137542	S	1	1	0.0143289	S	0.0166888	1	1	S	3	3	0.0997429	S	3	3	0.0729852	S	4	4	0.0960357	S	5	6
10529	NEBL	54.2857	R	1	1	0.00500769	S	2	2	0.00403075		0	0	0	S	1	1	0.00334405	S	2	2	0.00842014	R	1	1	0.00437598	S	1	1	0.00502446	S	0.00361888	1	1	S	2	2	0.0331173	S	1	1		S	5	5	0.0853013	S	3	3
6217	RPS16	11	R	1	1	0.00511087	R	1	1	0.0063055		0	0	0	S	1	1	0.00432512	S	1	1	0.00806732	R	1	1	0.00725476	S	1	1	0.00709221	S	0.00915043	1	1	S	3	3	0.0699467	S	3	3	0.0380404	S	7	7	0.141449	S	8	12
84859	LRCH3	38.0769	A	1	1	0.0461745	A	1	1	0.00544434		0	0	0	R	1	2	0.0271726	A	1	1	0.0254415	R	1	2	0.04821	R	1	3	0.0482077	A	0.047162	2	1	S	1	1	0.0155974	S	1	1	0.0125973	S	1	1	0.0155995	A	1	1
5440	POLR2K	3	S	1	1	0.0188824	S	1	1	0.018998		0	0	0	S	1	1	0.0151627	S	1	1	0.022446	S	1	1	0.0224638	S	1	1	0.0205713	S	0.0191351	1	1		0	0	0	S	1	1	0.158462	S	1	1	0.156918	R	1	1
93487	MAPK1IP1L	2.66667	S	1	1	0.0189804	S	1	1	0.020821		0	0	0	S	1	1	0.0121468	S	1	1	0.0242292	A	1	1	0.0135212	S	1	1	0.0273104	S	0.022809	1	1		0	0	0		0	0	0		0	0	0		0	0
84033	OBSCN	480.488	A	1	1	0.0423197	A	1	1	0.0382341		0	0	0	A	1	1	0.00812656	R	1	1	0.0468158	R	1	1	0.0508454		0	0	0	R	0.109842	2	1	S	2	2	0.0862074	S	1	1	0.0708805	S	1	3	0.253191		0	0
5001	ORC5	22.3333	S	2	2	0.00961735	S	2	2	0.00934934		0	0	0		0	0	0	S	1	1	0.00360781	S	2	2	0.0140382	S	1	1	0.00415524	S	0.00362295	1	1	S	5	5	0.109345	S	9	10	0.157514	S	5	6	0.13519	S	6	8
4869	NPM1	15.3333	S	1	1	0.00892346	S	1	1	0.0100655		0	0	0		0	0	0	S	1	1	0.00628205	R	1	1	0.0116481	S	1	1	0.0108924	S	0.0161325	1	1	S	7	15	0.363567	S	6	11	0.31702	S	7	14	0.448968	S	9	24
10279	PRSS16	21.3333	A	1	1	0.273171	S	1	2	0.0116055		0	0	0		0	0	0	R	1	2	0.348222	R	1	3	0.0491589	A	1	1	0.0453735	R	0.0772175	2	1	S	1	2	0.0494448	S	1	1	0.134672	S	1	2	0.122305	A	1	2
1665	DHX15	48	S	2	2	0.00949369	S	2	3	0.0116195		0	0	0		0	0	0	S	1	2	0.0080432	S	2	2	0.00933064		0	0	0	R	0.0117106	2	1	S	1	2	0.00847453	S	2	2	0.00923091	S	3	7	0.027472	S	5	10
26353	HSPB8	13	A	1	1	0.00565393	S	1	1	0.008755		0	0	0	S	1	1	0.00883876	S	1	1	0.0106633		0	0	0		0	0	0	S	0.0124767	1	1		0	0	0		0	0	0		0	0	0		0	0
11107	PRDM5	37.1333	A	1	1	0.0567535	R	1	1	0.0560308		0	0	0		0	0	0	R	1	1	0.0358423		0	0	0		0	0	0	R	0.0567937	2	1		0	0	0		0	0	0	S	1	1	0.00142504		0	0
81887	LAS1L	37.8462	S	1	1	0.00182165	A	1	1	0.00501486		0	0	0		0	0	0	A	1	1	0.00705787		0	0	0		0	0	0		0	0	0	S	4	5	0.0323144	S	1	1	0.00405364	S	5	6	0.0934804	S	8	13
55660	PRPF40A	41.875	S	3	3	0.0293048	S	2	2	0.0124841		0	0	0	S	2	2	0.0168556		0	0	0	S	2	2	0.00974974	S	1	1	0.00595051	S	0.025002	3	3	S	5	5	0.0629681	S	4	4	0.0275162	S	9	12	0.215083	S	11	17
130074	FAM168B	5.5	S	1	1	0.0222446	R	1	1	0.0180217		0	0	0	S	1	1	0.00889717		0	0	0	A	1	1	0.0182412	R	1	1	0.0260486	A	0.022101	1	1	S	1	2	0.0203272		0	0	0		0	0	0		0	0
79078	C1orf50	14	S	1	1	0.019494	S	1	1	0.00811723		0	0	0	S	1	1	0.013505		0	0	0	S	1	1	0.0108271	S	1	1	0.0115166	S	0.0138924	1	1		0	0	0	S	1	1	0.0136318		0	0	0	S	1	1
54439	RBM27	50.75	R	1	1	0.00525	R	1	1	0.0036519		0	0	0	S	3	3	0.00533682		0	0	0	S	1	1	0.000659304	S	1	1	0.0036326		0	0	0	S	1	1	0.00375264	S	2	2	0.00606918	S	3	3	0.0371323	S	8	9
25940	FAM98A	22	S	1	1	0.00114933	S	1	1	0.0018967		0	0	0	S	1	1	0.00211999		0	0	0	S	1	1	0.00236577		0	0	0	S	0.00266976	1	1	S	1	1	0.00749289		0	0	0	S	1	1	0.0130563	S	3	3
5435	POLR2F	6	S	1	1	0.0081223	S	1	1	0.00809343		0	0	0		0	0	0		0	0	0	S	1	1	0.00828604	S	1	1	0.00692112	S	0.00703798	1	1	S	2	2	0.0124009		0	0	0		0	0	0	R	1	1
147912	SIX5	26	S	1	1	0.00612514	S	1	2	0.00529578		0	0	0		0	0	0		0	0	0	S	1	1	0.00427065		0	0	0	R	0.00601549	1	1		0	0	0		0	0	0		0	0	0		0	0
25981	DNAH1	241.6	R	2	2	0.0121451	R	1	1	0.0128727		0	0	0		0	0	0		0	0	0	S	1	1	0.0121691		0	0	0		0	0	0		0	0	0		0	0	0		0	0	0		0	0
534	ATP6V1G2	5.66667	A	1	1	0.0116073	A	1	1	0.00888208		0	0	0		0	0	0		0	0	0	S	1	1	0.00601277		0	0	0		0	0	0		0	0	0		0	0	0		0	0	0		0	0
23036	ZNF292	142.667	R	1	1	0.00296391	R	1	1	0.00573362		0	0	0	S	1	1	0.00789687		0	0	0		0	0	0	S	1	1	0.00464775	R	0.00602549	1	1		0	0	0		0	0	0		0	0	0		0	0
9882	TBC1D4	67.3	S	1	1	0.00118835	A	2	3	0.0553492		0	0	0	A	1	1	0.096138		0	0	0		0	0	0		0	0	0		0	0	0		0	0	0		0	0	0		0	0	0		0	0
23047	PDS5B	63	S	4	5	0.01895	R	1	1	0.0025651		0	0	0	A	1	1	0.00146303		0	0	0		0	0	0	S	3	3	0.00471226	S	0.0101516	4	4	S	7	7	0.0893829	S	7	7	0.0614289	S	6	6	0.0953239	S	11	11
11051	NUDT21	18	R	1	1	0.00704806	A	1	1	0.00258265		0	0	0		0	0	0		0	0	0		0	0	0	R	1	1	0.00399996	S	0.0103977	3	3	S	5	5	0.0518864	S	2	2	0.0331357	S	3	3	0.0245187	S	8	10
27063	ANKRD1	19	R	1	1	0.0365708	A	1	1	0.0267248		0	0	0		0	0	0		0	0	0		0	0	0	A	1	1	0.0243817	A	0.0272343	1	1		0	0	0	S	1	1	0.0446098	S	1	1	0.039151	R	1	1
85313	PPIL4	30	A	1	1	0.00137267	A	1	1	0.0178528		0	0	0		0	0	0		0	0	0		0	0	0	A	1	1	0.0331037		0	0	0		0	0	0		0	0	0	S	1	2	0.0219615	A	1	1
55568	GALNT10	38	R	1	1	0.0419501	R	1	1			0	0	0		0	0	0		0	0	0		0	0	0	R	1	1	0.0263255		0	0	0		0	0	0		0	0	0		0	0	0	A	1	1
7862	BRPF1	71.5	R	1	1	0.00349722	S	1	1	0.00313268		0	0	0		0	0	0		0	0	0		0	0	0	S	1	1	0.00315831		0	0	0		0	0	0		0	0	0		0	0	0		0	0
4154	MBNL1	14.1429	S	2	2	0.0176428	A	1	2	0.0879621	S	2	2	0.0233566	S	2	2	0.016805	S	3	3	0.0265579	S	1	1	0.0169543	S	1	1	0.0216481	S	0.02825	3	3	S	1	1	0.0365488	S	1	1	0.0237977	S	5	6	0.230478	S	6	11
3853	KRT6A	38	S	25	50	0.132471	S	11	24	0.346756	S	39	108	2.83151	S	14	26	0.101544	S	15	29	0.357408	S	17	32	0.0712439	S	19	33	0.106817	S	0.117065	34	20	S	19	32	0.0773705	S	14	30	0.0665465	A	13	27	0	S	16	33
5089	PBX2	21	S	2	2	0.0222206	S	1	1	0.0172368	S	2	3	0.0520409		0	0	0	S	1	1	0.015729	S	2	2	0.0419272	R	1	1	0.00622674	R	0.00402603	1	1	S	2	3	0.0335461	S	4	6	0.0773456	S	4	6	0.0647161	S	2	4
3854	KRT6B	38	S	23	52	0.0502335	S	10	22	1.13315	S	38	102	2.55185	S	12	24	0.00760665	S	14	32	0.917491	A	14	28	0	S	18	34	2.21626	S	1.63725	32	18	S	18	31	0.0183057	S	15	31	1.42083	S	15	30	1.65475	S	15	33
9878	TOX4	23	S	2	2	0.013451	A	1	1	0.00126601	S	2	2	0.00776475	S	4	4	0.0125683		0	0	0	S	1	1	0.00368921	S	1	1	0.00229862	S	0.0217769	5	4	S	5	5	0.0861075	S	3	3	0.0238103	S	6	8	0.154536	S	6	7
829	CAPZA1	15.3333	S	2	2	0.0152543	S	1	1	0.00522348	S	1	1	0.0100568	S	1	1	0.00549695	S	2	2	0.0249088	S	1	1	0.00441107	S	1	1	0.00616808	S	0.0414807	3	3	S	2	2	0.025808	S	3	3	0.0333395	S	4	4	0.192792	S	4	5
9935	MAFB	10	S	2	3	0.0144769	R	1	1	0.00275821	R	1	1	0.00200011		0	0	0	R	1	1	0.00360591	S	2	2	0.00976337	S	2	2	0.011253	S	0.00792636	2	2		0	0	0		0	0	0		0	0	0		0	0
9355	LHX2	18	S	2	2	0.0470891	S	2	2	0.0184051	S	3	3	0.0143805	S	1	1	0.00912548	S	2	3	0.016193	S	2	2	0.0203128	S	2	2	0.0414255	S	0.015142	2	2		0	0	0		0	0	0		0	0	0		0	0
3860	KRT13	32	S	10	26	0.068865	S	7	12	0.825262	A	8	27	0	S	7	14	0.0714278	S	4	9	0.480931	S	8	11	0.013495	S	8	17	0.0167837	S	0.0306271	16	9	S	7	13	1.50572	S	7	13	0.887209	S	5	9	1.04687	A	6	11
5087	PBX1	19.125	S	3	3	0.0366047	S	1	1	0.0172368	A	1	2	0		0	0	0	S	1	1	0.015729	A	1	1	0		0	0	0		0	0	0	S	2	3	0.0870069	S	3	5	0.0573019	S	3	6	0.121878	S	4	7
5500	PPP1CB	20	S	4	4	0.00645495	A	1	1	0	S	3	3	0.0236769	S	2	2	0.00495103	S	3	3	0.0109605	S	1	1	0.00449176	S	4	5	0.0183877	S	0.0531072	4	4	S	6	11	0.227664	S	4	5	0.0802746	S	5	9	0.0748055	S	7	12
4087	SMAD2	17.7143	S	2	4	0.0195096	A	1	3	0	S	3	4	0.0439068	S	3	4	0.034522	S	2	3	0.0223681	S	2	4	0.0196549	S	3	5	0.0454985	S	0.04373	5	3	S	5	6	0.0906664	S	4	6	0.088321	S	5	8	0.169178	S	3	5
23648	SSBP3	12.6667	S	3	3	0.0443853	A	3	4	0	S	4	4	0.0414419	S	3	3	0.00839518	S	5	6	0.0433798	S	5	7	0.0423147	S	5	6	0.0242023	S	0.0213119	6	5	S	3	3	0.0475103	S	3	3	0.0277128	S	2	2	0.00749354	S	3	3
2810	SFN	18	S	3	3	0.0522773	A	2	3	0	S	3	4	0.0756212	S	2	3	0.0314433	S	3	3	0.0639712	S	3	4	0.125246	S	3	4	0.0722596	S	0.0643785	4	3	S	3	7	0.0717003	S	3	3	0.0296365	S	3	6	0.050063	S	3	6
51087	YBX2	17.5	S	3	6	0.0325845	A	1	3	0	S	5	7	0.0414793	S	2	4	0.031357	S	6	9	0.0843287	S	4	7	0.0566265	S	3	5	0.0419933	S	0.0400179	5	3	A	1	1	0	S	3	3	0.00642209	A	1	1	0	S	2	2
7534	YWHAZ	11	S	5	5	0.0563889	A	2	3	0	S	4	5	0.0821303	S	2	3	0.0161268	S	6	6	0.0715884	S	4	5	0.112557	A	2	3	0	S	0.0561398	5	4	S	6	11	0.258979	S	6	7	0.0959196	S	6	10	0.138365	S	9	14
7529	YWHAB	12.5	S	4	4	0.009019	A	2	3	0	S	4	5	0.016864	A	2	3	0	S	5	5	0.0181836	S	4	5	0.127395	S	4	5	0.00948119	A	0	4	3	S	8	12	0.0830569	S	4	4	0.012055	S	5	8	0.0236697	S	8	12
7277	TUBA4A	23.3333	S	14	54	7.18234	A	11	52	0	S	15	64	8.62756	A	14	37	0	S	16	70	8.29355	S	15	62	7.20672	A	15	54	0	A	0	54	15	S	17	69	20.981	S	18	75	16.2463	S	20	93	34.3038	S	23	114
51552	RAB14	16	S	2	2	0.00233246	A	1	1	0	S	3	5	0.00976519	S	2	2	0.0031159	S	3	4	0.012112	S	1	1	0.001189	A	1	1	0	S	0.00300358	2	2	S	4	4	0.0291696	A	1	1	0	S	3	4	0.0106998	S	2	4
10933	MORF4L1	19	S	3	3	0.0109932	A	1	1	0	S	3	3	0.0149814	S	1	1	0.00230328	S	4	5	0.0363289	A	1	1	0	A	1	1	0	A	0	1	1	S	6	6	0.0784718	A	2	2	0	S	8	8	0.128289	S	6	7
5052	PRDX1	15	A	1	1	0.00608827	A	1	1	0	S	3	3	0.0212451	S	2	2	0.00812017	S	4	4	0.0265429		0	0	0	S	1	1	0.00466337	S	0.00617921	1	1	S	7	7	0.151952	S	4	4	0.0552842		0	0	0	R	1	1
80205	CHD9	136.091	S	8	10	0.0315899	A	6	9	0	S	9	11	0.026242	S	10	14	0.0353683	A	2	2	0	S	8	10	0.020294	S	8	11	0.0296826	S	0.0292967	16	12	S	14	19	0.024535	S	11	15	0.0102172	S	14	18	0.0188777	S	11	16
3306	HSPA2	41	S	13	36	0.0316259	A	8	32	0	S	13	35	0.0238631	S	13	36	0.006954	A	11	25	0	S	12	35	0.00821173	S	15	42	0.0319846	S	0.0102986	38	13	A	11	35	0	A	11	34	0	S	11	35	0.017576	A	10	37
5991	RFX3	34.6667	S	3	4	0.0101478	A	2	2	0	S	2	2	0.00440132	S	2	3	0.00481248	A	1	1	0	S	2	2	0.00297892	A	1	1	0	S	0.00617595	4	4	S	2	3	0.00626669	A	1	1	0	A	3	3	0	S	6	7
144501	KRT80	34.3333	S	2	2	0.00180604	A	2	3	0	S	10	10	0.105856		0	0	0	A	2	13	0	S	3	4	0.000562754	A	2	3	0	A	0	2	2	S	3	3	0.000836715	A	2	3	0	S	4	5	0.00180165	S	3	4
3872	KRT17	35	S	10	20	0.0354473	A	8	14	0	S	34	83	4.39387	S	9	15	0.00689368	A	7	12	0	A	8	11	0	S	10	16	0.035467	A	0	12	8	S	13	17	0.052007	A	7	14	0	S	8	12	0.0206814	S	13	20
3320	HSP90AA1	30	S	3	3	0.0180056	A	1	1	0	S	4	4	0.022061	S	4	5	0.0257273		0	0	0	S	3	3	0.00850908	S	4	5	0.0226212	S	0.0527122	7	5	S	11	15	0.239427	S	5	7	0.0527069	S	8	11	0.235075	S	17	31
6429	SRSF4	10	S	2	2	0.00820014	A	1	1	0	S	1	1	0.00380971	A	1	1	0	S	2	2	0.0101886	A	1	1	0	S	2	2	0.00939121	S	0.00964948	2	2	A	1	1	0	S	1	1	0.00554013	A	1	1	0	S	2	2
84617	TUBB6	19.6667	S	9	46	0.0569838	A	6	43	0	A	6	42	0	S	8	46	0.0112795	S	7	42	4.84775	A	6	48	0	A	8	46	0	S	0.0268023	54	9	S	9	56	0.1225	S	9	48	0.0442223	S	14	80	0.215923	S	16	90
3024	HIST1H1A	9	S	9	33	0.0473177	A	5	52	0	A	7	29	0	S	10	25	0.022089	A	7	43	0	S	9	31	0.00852402	S	10	32	0.0317475	A	0	27	8	A	10	34	0	S	12	35	0.129007	S	9	23	0.0416661	S	7	21
1105	CHD1	92.25	S	7	8	0.00630449	A	3	4	0	A	4	6	0	S	6	9	0.00337782	A	1	1	0	A	4	4	0	S	5	8	0.00319629	A	0	8	5	S	13	17	0.272615	S	14	18	0.196483	S	17	20	0.324702	S	9	13
3859	KRT12	31	S	3	5	0.00319653	A	2	5	0	A	2	4	0	A	2	4	0	A	2	3	0	A	2	4	0	A	2	3	0	A	0	2	1	A	2	2	0	A	1	2	0	A	1	1	0	A	2	2
6132	RPL8	13	S	1	1	0.0111001		0	0	0	S	1	1	0.0112871	S	1	1	0.00758	S	1	1	0.0134115	S	1	1	0.0119622	S	1	1	0.0112442	S	0.0104194	1	1	S	2	2	0.0439936	S	5	5	0.0452246	S	4	4	0.0816279	S	3	3
22807	IKZF2	28.2727	S	1	1	0.00911953		0	0	0	S	5	6	0.0813322	S	3	4	0.0423063	S	3	3	0.0377338	S	4	5	0.055308	S	2	2	0.0368685	S	0.0520877	4	3	S	3	3	0.0272076	S	2	2	0.022353	S	2	2	0.0248014	S	2	2
4841	NONO	26	S	3	4	0.0156026		0	0	0	S	1	1	0.00698956	S	3	4	0.0203407	S	2	2	0.0189193	S	2	2	0.0112401	S	2	3	0.0181164	S	0.0171058	4	3	S	4	5	0.0851266	S	7	9	0.24617	S	4	5	0.0973514	S	13	19
6230	RPS25	6	S	1	1	0.00832405		0	0	0	S	1	1	0.0407502	S	2	2	0.0358571	S	3	3	0.0603181	S	1	1	0.0368299	R	1	1	0.0328632	S	0.0448835	2	2	S	4	4	0.364536	S	3	3	0.221821	S	3	3	0.326381	S	4	6
57418	WDR18	23	S	2	2	0.0128933		0	0	0	S	1	1	0.00410997	S	2	2	0.00730902	S	2	2	0.0114834	S	1	1	0.00834693	R	1	1	0.00698606	S	0.00979131	2	2	S	2	2	0.0384892	S	2	2	0.0255713	S	6	6	0.183756	S	10	13
3660	IRF2	15.6667	S	3	3	0.025342		0	0	0	S	3	3	0.0279684	R	1	1	0.00415413	R	1	1	0.0128747	R	2	2	0.0114307	A	2	2	0.0132177	R	0.00477391	1	1	S	4	7	0.177039	S	5	8	0.203338	S	4	7	0.19172	S	4	6
54797	MED18	10	S	1	1	0.0322685		0	0	0	A	1	1	0.00876653	S	1	1	0.0321654	S	3	4	0.0583421	A	2	2	0.0126373	S	1	1	0.0309555	S	0.0284235	2	2	S	2	2	0.0362247	S	1	2	0.0150712	S	3	3	0.0476987	S	2	3
80004	ESRP2	41.2	R	1	1	0.00847421		0	0	0	S	2	2	0.0147319	S	4	4	0.0229613	S	1	1	0.00780439	S	1	1	0.007489	S	2	2	0.0108765	S	0.0228536	4	4	S	1	1	0.00877354	S	1	1	0.00110336	S	3	3	0.101563	S	4	4
11224	RPL35	5	R	1	1	0.00240904		0	0	0	S	2	2	0.00517252	A	1	1	0.00236821	R	1	1	0.00481771	S	1	1	0.00415944	S	2	2	0.00856972	R	0.00388905	2	2	S	2	2	0.0274119	S	1	1	0.00958024	S	2	2	0.0219264	S	1	2
10849	CD3EAP	24	R	2	2	0.015733		0	0	0	R	1	1	0.0212741	R	1	1	0.0106111	S	1	1	0.00927518	R	1	1	0.0106378	S	1	1	0.0149155	S	0.0261594	2	2	S	12	26	2.42588	S	12	20	1.76301	S	13	26	3.15423	S	11	22
5111	PCNA	19	S	1	1	0.00623626		0	0	0	S	1	1	0.0072345	S	1	1	0.00355199	S	1	1	0.00763899	S	2	2	0.0074906	S	1	1	0.00493045	S	0.00601712	1	1	S	1	2	0.00579807	S	1	1	0.00274139	S	2	2	0.0100248	S	2	2
22827	PUF60	34	S	2	2	0.00832082		0	0	0	R	2	2	0.0241697	S	2	2	0.0105237	R	1	1	0.00608894	S	2	2	0.00937409	R	1	1	0.00686643	S	0.0154303	2	2	S	4	6	0.198525	S	1	1	0.041175	S	13	19	0.7988	S	17	32
125950	RAVER1	38	S	2	2	0.0407192		0	0	0	R	1	1	0.0249535	S	3	3	0.0373229	S	3	3	0.0367472	R	1	1	0.0015932	S	3	3	0.047481	S	0.193038	11	9	S	10	17	0.324098		0	0	0	S	24	58	2.4243	S	22	57
430	ASCL2	14	S	3	3	0.0236032		0	0	0	S	2	2	0.0173939	S	2	2	0.0127359	S	2	2	0.0143863	S	3	3	0.0257322	S	2	2	0.0206112	S	0.0216132	3	3	S	1	1	0.00647075		0	0	0	S	1	1	0.00558629	R	1	1
84312	BRMS1L	19.4	R	1	1	0.00759529		0	0	0	S	1	1	0.010346	S	1	1	0.0049243	R	1	1	0.00576638	S	1	1	0.00664207	R	1	1	0.00730707	A	0.00656469	1	1	S	1	1	0.00925373		0	0	0	S	1	1	0.00955679		0	0
65980	BRD9	26.0833	S	2	2	0.00952167		0	0	0	S	1	1	0.00929243	S	3	3	0.0141715	R	1	1	0.00434649	S	1	1	0.00526386	S	1	1	0.00782247	S	0.0142092	3	3	S	1	1	0.0053384		0	0	0	S	2	2	0.0174367	S	1	1
6228	RPS23	8	R	1	1	0.00811966		0	0	0	S	1	1	0.0132453	S	1	1	0.00762697	S	1	1	0.0101044	S	1	1	0.0156178	S	1	1	0.0117994	S	0.017234	1	1	S	2	2	0.056997		0	0	0	S	1	1	0.0490112	S	2	2
7071	KLF10	28.5	S	2	2	0.0100019		0	0	0	S	3	3	0.0213602	A	1	1	0.0106481	S	1	1	0.00429926	S	2	2	0.00533161	S	1	1	0.00312462	S	0.00216135	1	1	S	1	1	0.0086926		0	0	0	S	1	1	0.00946883	A	1	1
1874	E2F4	25	S	2	2	0.0104327		0	0	0	R	3	3	0.0196086	S	3	3	0.0267852	R	1	1	0.00267345	S	4	4	0.024805	S	4	4	0.0296227	S	0.0229576	3	3	S	3	3	0.00964095	S	2	2	0.0204178	S	3	3	0.0307911	S	2	2
5308	PITX2	12	S	1	1	0.0051666		0	0	0	S	1	1	0.00515648	S	1	1		S	1	1	0.0060894	S	1	1		S	1	1	0.00556062	S	0.00375485	1	1	S	1	1			0	0	0	S	1	1	0.00715954		0	0
80829	ZFP91	33	S	1	1	0.0052183		0	0	0	S	1	1	0.00613463	S	1	1	0.00610862	S	1	1	0.00495994	S	1	1	0.0042259	S	1	1	0.00598248	S	0.0092348	2	2		0	0	0	S	1	1	0.00186332	S	1	1	0.00664417	S	1	1
257397	TAB3	33.7143	S	1	2	0.0111206		0	0	0	S	1	1	0.0237603	S	1	1	0.02141	S	1	2	0.0340502	S	1	2	0.0316499	S	1	1	0.0229073	S	0.0284157	2	1		0	0	0		0	0	0	S	1	1	0.00245495	R	1	1
57708	MIER1	23.8889	S	1	1	0.00931723		0	0	0	S	1	1		S	1	1		S	2	2	0.0127513	S	2	2	0.0123595	S	2	2	0.007546	S	0.010304	2	2		0	0	0		0	0	0		0	0	0		0	0
51493	RTCB	31	R	1	1	0.00350721		0	0	0	S	1	1	0.00509592	A	1	1	0.00402908	S	1	1	0.00306161	R	1	1	0.00337587	S	2	2	0.00842369		0	0	0	S	4	4	0.0300162	S	4	4	0.0262306	S	4	4	0.0352057	S	6	7
126208	ZNF787	12	S	3	4	0.0320583		0	0	0	S	3	4	0.0350358	R	1	1	0.0060659	S	3	3	0.0179088	S	3	4	0.0311851	S	1	1	0.00329032		0	0	0	S	1	1	0.00516191	S	1	1	0.00337397		0	0	0		0	0
7284	TUFM	31	A	1	2	0.0156213		0	0	0	A	1	1	0.00622104	R	1	1	0.00583667	A	1	1	0.00710137	R	1	1	0.00495358		0	0	0	A	0.00594497	1	1	S	2	2	0.0141789	S	1	1	0.00617834	S	1	1	0.00839265		0	0
1877	E4F1	36	S	2	2	0.0110241		0	0	0	S	2	2	0.0084002	S	2	2	0.00862553	S	1	1	0.00176012	S	1	1	0.00562656		0	0	0	S	0.00720129	2	2	S	1	1	0.0102308	S	1	1	0.00618653		0	0	0		0	0
6205	RPS11	10	S	1	1	0.00494651		0	0	0	S	1	1	0.0114229		0	0	0	S	1	1	0.00554126	A	1	1	0.00946501	R	2	2	0.0124738	R	0.015355	2	2	S	6	6	0.095159	S	4	4	0.0673477	S	4	4	0.0823884	S	5	7
6175	RPLP0	20	S	1	1	0.00913524		0	0	0	S	1	1	0.00237036		0	0	0	S	2	2	0.0175648	S	1	1	0.0144751	S	1	1	0.0122048	S	0.0144737	1	1	S	3	5	0.0710358	S	2	2	0.039332	S	4	6	0.131648	S	4	6
5000	ORC4	24	S	3	3	0.0161404		0	0	0	A	1	1	0.00551629		0	0	0	S	2	2	0.0080049	S	1	1	0.00163238	S	1	1	0.00421709	A	0.00326639	1	1	S	5	5	0.070971	S	7	7	0.120407	S	7	8	0.17642	S	6	7
56970	ATXN7L3	20	S	1	1	0.00501489		0	0	0	R	2	2	0.0163164		0	0	0	S	1	1	0.00862527	R	1	1	0.00402319	S	1	1	0.00479636		0	0	0	S	2	2	0.0497252	S	3	3	0.0536014	S	2	2	0.0442997	S	3	3
6122	RPL3	19	S	1	1	0.00484873		0	0	0	R	1	1	0.00178063		0	0	0	A	1	1	0.00345613	A	1	1	0.00268307		0	0	0	S	0.00563662	2	2	S	4	4	0.0494591	S	5	6	0.0739562	S	9	9	0.115687	S	9	9
7551	ZNF3	22.4286	S	3	3	0.0231062		0	0	0	S	2	2	0.0189552		0	0	0	S	1	1	0.0121658	S	2	2	0.0184551		0	0	0	S	0.0122348	1	1	S	1	1	0.00560847	S	1	1	0.00516616	S	1	1	0.0093161	S	2	2
2961	GTF2E2	18	R	1	1	0.00486515		0	0	0	A	1	1	0.00544092		0	0	0	R	1	1	0.00660224	S	3	3	0.0139793		0	0	0	R	0.00478801	1	1		0	0	0		0	0	0	S	1	1	0.00171885	S	1	1
6280	S100A9	9	S	2	4	0.0413977		0	0	0	S	2	2	0.0214106	A	2	2	0.00778429	S	2	2	0.0337178		0	0	0	S	2	3	0.0265008	A	0.0047674	1	1	S	1	1			0	0	0		0	0	0		0	0
10911	UTS2	6	S	1	1	0.0128696		0	0	0	S	1	1	0.0311681	S	1	1	0.0275599	S	1	1	0.0296434		0	0	0	S	1	1	0.036325	S	0.0328355	1	1		0	0	0	S	1	1	0.0067257	S	1	1	0.0683378	S	1	1
23345	SYNE1	495.353	R	1	2	0.0207384		0	0	0	A	1	1	0.0103085	A	1	1	0.0045178	R	2	3	0.0354404		0	0	0	R	2	2	0.0131474	A	0.00384687	1	1		0	0	0	S	1	1	0.0157673		0	0	0	R	1	1
619279	ZNF704	25	S	1	1	0.0026943		0	0	0	R	1	1	0.00322908	S	1	1	0.00229987	A	1	1	0.00198053		0	0	0	S	1	1	0.00336522	S	0.00238184	1	1		0	0	0		0	0	0		0	0	0		0	0
51333	ZNF771	23	S	1	1	0.00446168		0	0	0	S	1	1	0.00719846		0	0	0	S	1	2	0.013528		0	0	0		0	0	0		0	0	0		0	0	0		0	0	0		0	0	0		0	0
55690	PACS1	45.3333	R	1	1	0.00221225		0	0	0	R	1	1	0.00158858	A	1	1	0.00121642	A	1	1	0.00658445		0	0	0	A	1	1	0.00314961	S	0.003602	1	1		0	0	0		0	0	0	S	2	2	0.0203507	S	8	9
284058	KANSL1	56.1429	S	9	9	0.0532586		0	0	0	S	5	5	0.0148024	S	4	4	0.0183827		0	0	0	S	4	4	0.0102456	S	4	4	0.0112221	S	0.0305458	6	6	S	3	3	0.0291542	S	3	3	0.0322574	S	8	8	0.113396	S	5	5
9181	ARHGEF2	56	S	4	4	0.0120723		0	0	0	S	2	2	0.00300011	S	6	6	0.0155467		0	0	0	A	2	2	0.00226346	S	3	3	0.00481985	S	0.0226672	6	6	S	5	5	0.0305421	S	1	1	0.0035154	S	11	13	0.209534	S	15	17
11176	BAZ2A	79.5	S	5	5	0.0272194		0	0	0	S	2	2	0.0114517	R	1	1	0.00807754		0	0	0	A	1	1	0.0033213	S	1	1	0.00235759	A	0.00313651	1	1	S	6	6	0.053534	S	3	3	0.0181395	S	3	3	0.0282764	S	4	4
11011	TLK2	41.3158	S	4	4	0.0140832		0	0	0	R	2	2	0.00634951	S	2	2	0.00463271		0	0	0	S	4	4	0.0120838	S	2	2	0.00475134	R	0.0072959	3	3	S	15	18	0.780567	S	10	10	0.815448	S	14	18	0.425969	S	13	17
3837	KPNB1	44.5	S	1	1	0.00548337		0	0	0	S	1	1	0.00338558	S	1	1	0.00429812		0	0	0	R	1	1	0.0019845	A	1	1	0.00219009	S	0.00887155	2	2	S	7	8	0.0951537	S	1	1	0.0104075	S	9	18	0.341289	S	13	24
1500	CTNND1	52.5333	S	3	3	0.00952854		0	0	0	S	1	1	0.0013037	S	3	3	0.00923188		0	0	0	S	2	2	0.00435789	R	1	1	0.0014794	S	0.0118671	3	3	S	2	2	0.018218	S	2	2	0.0101428	S	6	6	0.0978215	S	13	17
23060	ZNF609	76	A	1	1	0.00765082		0	0	0	R	2	2	0.0106783	R	1	1	0.0107113		0	0	0	S	1	1	0.00514602	A	1	3	0.101745	S	0.0203822	2	2	S	3	3	0.0336481	S	2	2	0.0157643	S	3	3	0.0512345	S	3	4
10840	ALDH1L1	61	S	1	1	0.0114726		0	0	0	S	1	1	0.0147752	S	1	1	0.00641162		0	0	0	S	1	1	0.0116661	A	1	1	0.010354	A	0.00849369	1	1	S	1	1	0.00746651	S	1	1	0.00685696	S	2	2	0.00891113		0	0
51105	PHF20L1	39.5385	S	1	1	0.00326693		0	0	0	S	2	2	0.00355162	S	2	2	0.00725405		0	0	0	S	2	2	0.00239791	S	1	1	0.00227829	S	0.0109476	3	3	S	1	1	0.00340563	S	1	1	0.00388983	S	2	3	0.139465		0	0
10725	NFAT5	41.2222	S	2	2	0.0204273		0	0	0	R	2	2	0.013238	R	2	2	0.0120422		0	0	0	S	2	2	0.00822694	S	2	2	0.0098942	S	0.00782346	1	1	S	1	1	0.0173037	S	4	4	0.0405748	S	1	1	0.0143598	S	2	3
83449	PMFBP1	74	R	1	1	0.00884195		0	0	0	R	1	1	0.010345	A	1	1	0.00615479		0	0	0	A	1	1	0.00555955	A	1	1	0.00445097	S	0.0044054	1	1	S	1	1	0.00575439		0	0	0		0	0	0		0	0
154810	AMOTL1	49.7143	S	1	1	0.00282871		0	0	0	R	1	1	0.00178962	A	1	1	0.00148289		0	0	0	A	1	1	0.00106764	R	1	1	0.00284344	A	0.0041324	2	2		0	0	0	S	1	1	0.00517176		0	0	0	A	1	1
642	BLMH	29	S	1	2	0.0223328		0	0	0	S	1	2	0.0207336	R	1	1	0.00322319		0	0	0	R	1	1	0.00320909	S	1	1	0.00452442	A	0.00479117	1	1		0	0	0		0	0	0		0	0	0		0	0
401258	RAB44	48.5	S	1	1	0.0137434		0	0	0	R	1	1	0.0141101	S	1	1	0.0157871		0	0	0	A	1	2	0.0213128	S	1	2	0.0374305	R	0.0197638	1	1		0	0	0		0	0	0		0	0	0		0	0
8886	DDX18	39	S	2	2	0.0133902		0	0	0	R	1	1	0.0065797	S	2	2	0.0102601		0	0	0	A	1	1	0.00192542	S	2	3	0.00924279	S	0.00493811	1	1		0	0	0		0	0	0		0	0	0		0	0
3166	HMX1	15.5	S	1	3	0.0293608		0	0	0	S	1	2	0.032007	S	1	2	0.033998		0	0	0	S	1	3	0.030009	S	1	1	0.00299088	S	0.0288748	3	1		0	0	0		0	0	0		0	0	0		0	0
155061	ZNF746	39.5	S	1	1	0.00350744		0	0	0	S	1	1	0.00397646	S	1	1	0.00376102		0	0	0	S	1	1	0.00257139	S	1	1	0.00440715	R	0.00393867	1	1		0	0	0		0	0	0		0	0	0		0	0
288	ANK3	177.725	S	1	1	0.0073511		0	0	0	S	1	1	0.00558285	S	3	3	0.0150603		0	0	0	S	1	1	0.00641304		0	0	0	S	0.00937883	1	1	S	1	1	0.0180183	S	1	1	0.00843193	S	11	14	0.259341	S	26	40
24148	PRPF6	61.5	R	1	1	0.00125158		0	0	0	R	1	1	0.00133108	R	1	1	0.00138254		0	0	0	S	1	1	0.000819984		0	0	0	R	0.00125469	1	1	S	5	5	0.0197922	S	1	1	0.00307158	S	4	4	0.0260883	S	10	10
988	CDC5L	48	R	1	1	0.00268869		0	0	0	S	2	2	0.0045606	S	1	1	0.00400511		0	0	0	S	1	1	0.00224293		0	0	0	R	0.00401129	1	1	S	4	4	0.0391555	S	3	3	0.0402593	S	5	5	0.056382	S	8	9
9543	IGDCC3	37.25	S	1	1	0.00212175		0	0	0	S	1	1	0.00120702	S	1	1	0.00141591		0	0	0	S	1	1	0.00121784		0	0	0	R	0.00109377	1	1		0	0	0	S	1	1	0.000537317	S	1	1	0.000697611	R	1	1
2825	GPR1	14	S	1	1	0.0139449		0	0	0	R	1	1	0.0118571	R	1	1	0.0139114		0	0	0	R	1	1	0.00994457		0	0	0	R	0.0128084	1	1		0	0	0		0	0	0		0	0	0		0	0
23361	ZNF629	62.5	A	1	1	0.00395812		0	0	0	S	1	1	0.00384336	R	1	1	0.00511632		0	0	0	A	1	1	0.00204383		0	0	0		0	0	0		0	0	0		0	0	0	S	1	1	0.0136564	R	1	1
7253	TSHR	27.75	S	1	1	0.00619634		0	0	0	S	1	1	0.00673785	S	1	1	0.00649038		0	0	0	S	1	1	0.0044334		0	0	0		0	0	0		0	0	0		0	0	0		0	0	0		0	0
51366	UBR5	149.5	S	1	1	0.0041046		0	0	0	S	1	1	0.0030126		0	0	0		0	0	0	A	1	1	0.00198676		0	0	0	S	0.00857415	3	3	S	3	3	0.0330435	S	1	1	0.00687003	S	9	9	0.111139	S	22	29
6921	ELOC	7	S	1	1	0.00123658		0	0	0	S	1	1	0.00167367		0	0	0		0	0	0	A	1	1	0.00115338		0	0	0		0	0	0	S	3	6	0.338185	S	3	4	0.0999701	S	3	5	0.181591	S	3	6
23338	JADE2	44	A	1	1	0.000679137		0	0	0	S	1	1	0.00226517		0	0	0		0	0	0	S	1	1			0	0	0		0	0	0	S	2	2	0.0170446	S	2	2	0.012603	S	2	3	0.0246426	S	2	2
283450	HECTD4	238	A	1	1	0.0053479		0	0	0	A	1	1	0.00589134		0	0	0		0	0	0	R	1	1	0.00288168		0	0	0		0	0	0	S	1	1	0.00104103		0	0	0	S	1	1	0.00415658	S	2	2
57448	BIRC6	240.889	S	1	1	0.0188259		0	0	0	R	1	1	0.0141906		0	0	0		0	0	0	R	1	1	0.00222003		0	0	0		0	0	0		0	0	0		0	0	0		0	0	0		0	0
23248	RPRD2	63.8	S	4	4	0.0127208		0	0	0	S	1	1	0.00163428	S	2	2	0.00897874		0	0	0		0	0	0	S	2	2	0.00564802	S	0.0469646	6	6	S	8	8	0.138013	S	1	1	0.00567076	S	24	31	0.958696	S	19	23
8726	EED	27.1429	A	1	1	0.0039603		0	0	0	S	1	1	0.0100827	R	2	2	0.00696453		0	0	0		0	0	0	S	2	2	0.0156508	S	0.0088386	1	1	S	2	2	0.0135125	S	3	3	0.0171724	S	2	2	0.0153749	S	2	2
23517	MTREX	64	S	2	2	0.00564252		0	0	0	R	1	1	0.00195763	A	2	2	0.00454971		0	0	0		0	0	0	A	1	1	0.00178309	S	0.00298368	2	2	S	4	4	0.0249168	S	1	1	0.00312716	S	3	3	0.0202076	S	5	6
10594	PRPF8	152	S	4	4	0.0121318		0	0	0	S	2	2	0.00698568	S	3	3	0.0100086		0	0	0		0	0	0	A	1	1	0.004078	A	0.00186469	1	1	S	1	1	0.00119437	S	2	2	0.00843497	S	7	7	0.0502095	S	32	39
9493	KIF23	53.1667	S	2	2	0.0108783		0	0	0	R	1	1	0.00450412	S	3	3	0.0118404		0	0	0		0	0	0	A	1	1	0.00146253	S	0.0107395	3	3	S	1	1	0.00797687		0	0	0	S	5	6	0.0839224	S	7	8
2627	GATA6	25	S	1	1	0.00934517		0	0	0	S	1	1	0.0132284	S	1	1	0.00905754		0	0	0		0	0	0	S	2	2	0.0254071	A	0.00160769	1	1	S	1	1	0.00443354		0	0	0		0	0	0	S	2	2
163033	ZNF579	39	S	2	2	0.0173611		0	0	0	S	1	1	0.00381772	S	3	3	0.0142912		0	0	0		0	0	0	S	3	3	0.0049132	R	0.00985831	1	1		0	0	0		0	0	0	S	1	1	0.00499649		0	0
152206	CCDC13	38.2857	S	1	1	0.0104516		0	0	0	S	1	1	0.00867283	A	1	1	0.00508087		0	0	0		0	0	0	R	1	1	0.00315875	A	0.0038901	1	1		0	0	0		0	0	0		0	0	0		0	0
643836	ZFP62	65.8571	R	2	2	0.00491873		0	0	0	A	1	1	0.00174163	A	1	1	0.00160272		0	0	0		0	0	0	A	1	1	0.00155135	S	0.00201745	1	1		0	0	0		0	0	0		0	0	0		0	0
254225	RNF169	46	S	1	1	0.00393657		0	0	0	S	1	1	0.00202771	S	1	1	0.00297095		0	0	0		0	0	0	A	1	1	0.00177746		0	0	0	S	5	5	0.0348777	S	3	3	0.0142538	S	6	8	0.102917	S	8	8
23215	PRRC2C	140.556	A	1	1	0.00544788		0	0	0	A	1	1	0.00449613	S	1	1	0.00575177		0	0	0		0	0	0	A	1	1	0.00311618		0	0	0		0	0	0		0	0	0	S	1	1	0.00288022	S	2	2
200765	TIGD1	40	S	2	2	0.0130232		0	0	0	S	1	1	0.00464935	R	2	2	0.00764394		0	0	0		0	0	0		0	0	0	R	0.00482138	1	1	S	1	1	0.00753726	S	1	1	0.00859243	S	1	1	0.00925102	S	1	1
23451	SF3B1	29.3333	S	2	2	0.00855084		0	0	0	S	2	2	0.00704952	S	3	3	0.0143822		0	0	0		0	0	0		0	0	0	S	0.012609	3	3	S	1	1	0.00937019	S	2	2	0.00898724	S	3	3	0.0302882	S	11	13
27332	ZNF638	105.571	S	1	1	0.00305184		0	0	0	S	1	1	0.00724792	S	1	1	0.00802031		0	0	0		0	0	0		0	0	0	S	0.0131699	2	2	S	1	1	0.0140597	S	1	1	0.00767473	S	5	5	0.0676079	S	8	10
388697	HRNR	79	S	1	3	0.00613698		0	0	0	S	2	7	0.0537742	R	1	3	0.00289281		0	0	0		0	0	0		0	0	0	R	0.00205675	1	1	S	1	2	0.0055783		0	0	0	S	1	2	0.00191722	R	1	1
79447	PAGR1	14	S	1	1	0.0131991		0	0	0	S	1	1	0.00841929	S	2	2	0.0191388		0	0	0		0	0	0		0	0	0	R	0.00198548	1	1	S	1	1	0.000571602		0	0	0	S	1	1	0.0263391		0	0
4913	NTHL1	16.75	R	1	1	0.00558794		0	0	0	S	1	1	0.00138823	S	1	1	0.00228568		0	0	0		0	0	0		0	0	0		0	0	0	S	2	2	0.0412408	S	2	2	0.0245062	S	2	2	0.036178	S	3	3
83889	WDR87	180	S	1	1	0.00197692		0	0	0	S	1	1	0.0028985	S	1	1	0.00184071		0	0	0		0	0	0		0	0	0		0	0	0		0	0	0		0	0	0		0	0	0		0	0
163050	ZNF564	34	R	1	1	0.0127462		0	0	0	A	1	1	0.036787		0	0	0		0	0	0		0	0	0	R	1	1	0.0224972	A	0.0157844	1	1	S	1	1	0.0671802	S	1	1	0.0788738		0	0	0	A	1	1
84125	LRRIQ1	86.4545	R	1	1	0.0687256		0	0	0	S	1	1	0.0334243		0	0	0		0	0	0		0	0	0	R	1	1	0.0149778	R	0.0119643	1	1		0	0	0		0	0	0		0	0	0		0	0
1823	DSC1	52	S	1	2	0.0151174		0	0	0	S	3	6	0.144355		0	0	0		0	0	0		0	0	0	S	1	2	0.0101432	R	0.0043341	1	1		0	0	0		0	0	0		0	0	0		0	0
256076	COL6A5	141.6	A	1	1	0.071155		0	0	0	A	1	1	0.129973		0	0	0		0	0	0		0	0	0	A	1	1	0.07085		0	0	0		0	0	0	S	1	2	0.467152		0	0	0		0	0
55893	ZNF395	24	R	1	1	0.00282163		0	0	0	R	1	1	0.00991884		0	0	0		0	0	0		0	0	0	R	1	1	0.00782673		0	0	0		0	0	0		0	0	0		0	0	0	S	1	1
23201	FAM168A	6.8	A	1	1	0.00522956		0	0	0	S	1	1	0.00710536		0	0	0		0	0	0		0	0	0	A	1	1	0.00753589		0	0	0		0	0	0		0	0	0		0	0	0	A	1	1
80824	DUSP16	35	R	1	1	0.0396781		0	0	0	A	1	1	0.033183		0	0	0		0	0	0		0	0	0		0	0	0	A	0.0255625	1	1	S	1	1	0.0516438	S	1	1	0.0338345	S	1	1	0.0371381		0	0
8732	RNGTT	38	R	2	2	0.00873632		0	0	0	R	1	1	0.00508818		0	0	0		0	0	0		0	0	0		0	0	0	R	0.0104229	2	2	S	1	1	0.00945316		0	0	0	S	6	7	0.129691	S	4	4
5933	RBL1	57	R	1	1	0.00205884		0	0	0	A	1	1	0.0017902		0	0	0		0	0	0		0	0	0		0	0	0	R	0.00248952	1	1	S	1	1	0.00349999		0	0	0	S	2	2	0.0105586	S	1	1
832	CAPZB	15	S	1	1	0.00675697		0	0	0	A	1	1	0.00528646		0	0	0		0	0	0		0	0	0		0	0	0	R	0.019572	1	1		0	0	0		0	0	0	S	2	2	0.0308373	S	8	9
80895	ILKAP	24	S	1	1	0.0300961		0	0	0	S	1	1	0.0434723		0	0	0		0	0	0		0	0	0		0	0	0		0	0	0	S	1	1	0.0600943	S	1	1	0.0661396	S	1	1	0.0574162	R	1	1
27445	PCLO	239	R	1	2	0.388226		0	0	0	R	1	1	0.48023		0	0	0		0	0	0		0	0	0		0	0	0		0	0	0	S	1	3	0.531292	S	1	1	0.0540654	S	1	2	0.0603259	R	2	3
128710	SLX4IP	22.75	R	1	1	0.00218257		0	0	0	S	1	1	0.00349218		0	0	0		0	0	0		0	0	0		0	0	0		0	0	0	S	2	2	0.0281848	S	1	1	0.00289109	S	3	3	0.0420327	S	3	3
342897	NCCRP1	10.5	S	1	1	0.00124274		0	0	0	S	2	2	0.0120894		0	0	0		0	0	0		0	0	0		0	0	0		0	0	0	S	1	1	0.000375079		0	0	0		0	0	0		0	0
63925	ZNF335	47.75	S	1	1	0.0072519		0	0	0	R	1	1	0.00817133		0	0	0		0	0	0		0	0	0		0	0	0		0	0	0		0	0	0		0	0	0		0	0	0	R	1	1
744	MPPED2	13.3333	S	1	1	0.00415234		0	0	0	S	1	1	0.00484153		0	0	0		0	0	0		0	0	0		0	0	0		0	0	0		0	0	0		0	0	0		0	0	0		0	0
200010	SLC5A9	27.3333	S	1	1	0.00676544		0	0	0	S	1	1	0.0416704		0	0	0		0	0	0		0	0	0		0	0	0		0	0	0		0	0	0		0	0	0		0	0	0		0	0
54849	DEF8	28.8571	S	1	1	0.0072913		0	0	0	S	1	1	0.00788239		0	0	0		0	0	0		0	0	0		0	0	0		0	0	0		0	0	0		0	0	0		0	0	0		0	0
448834	KPRP	34	S	1	1	0.00125546		0	0	0	S	2	2	0.0446549		0	0	0		0	0	0		0	0	0		0	0	0		0	0	0		0	0	0		0	0	0		0	0	0		0	0
91582	RPS19BP1	8	R	1	1	0.00467864		0	0	0	S	1	1	0.00660732		0	0	0		0	0	0		0	0	0		0	0	0		0	0	0		0	0	0		0	0	0		0	0	0		0	0
253943	YTHDF3	25.3333	S	1	1	0.0066943		0	0	0	R	2	2	0.00640234	S	4	4	0.0125105		0	0	0	S	2	2	0.00621647	A	2	2	0	S	0.00535349	2	2	S	1	2	0.00549978	S	3	3	0.00640729	S	5	5	0.0109031	S	2	2
4211	MEIS1	20	S	2	2	0.012031		0	0	0	R	1	1			0	0	0		0	0	0	S	3	3	0.0186113	S	3	3	0.0154094	A	0	4	3	S	1	1	0.00199534	S	2	2	0.0045654	S	1	1	0.00253872	S	1	1
4212	MEIS2	17.5333	S	2	2	0.00728596		0	0	0	R	1	1			0	0	0		0	0	0	S	3	3	0.00926578	A	2	2	0	S	0.0206981	5	4	S	1	1	0.00199534	S	2	2	0.0045654	S	1	1	0.00253872	S	1	1
8019	BRD3	32.3333	S	3	3	0.0100283		0	0	0	A	1	1	0	R	3	3	0.00216873		0	0	0		0	0	0		0	0	0	A	0	1	1		0	0	0	A	1	1	0	A	1	1	0	A	1	1
1051	CEBPB	15	S	2	2	0.0362045		0	0	0		0	0	0	S	1	1	0.0134114	S	2	2	0.0397975	S	1	1	0.0270692	S	1	1	0.0231427	S	0.0285289	2	2	S	2	2	0.0659132	S	1	1	0.0204016	S	2	2	0.0643599	S	1	1
6187	RPS2	22	R	1	1	0.00840498		0	0	0		0	0	0	R	1	1	0.00479054	S	1	1		S	1	1	0.00106221	S	2	2	0.016574	S	0.00869804	1	1	S	1	1	0.0174439	S	1	1	0.00588739	S	2	2	0.0363079	S	4	4
80204	FBXO11	50.8333	S	6	9	0.0479824		0	0	0		0	0	0	R	3	4	0.0143968	S	1	1	0.00605537	R	2	2	0.00932585	R	2	2	0.0101705	R	0.0153946	3	3		0	0	0		0	0	0	S	1	1	0.00393419		0	0
1981	EIF4G1	85.5714	A	1	1	0.00678313		0	0	0		0	0	0	A	1	1	0.00837218	A	1	1	0.0148538	A	1	1	0.017391		0	0	0	R	0.0396277	2	1		0	0	0		0	0	0	S	4	4	0.0749946	S	12	15
51193	ZNF639	30	R	1	1	0.00370845		0	0	0		0	0	0		0	0	0	S	1	1	0.00540824	A	1	1	0.00541148		0	0	0	S	0.00118428	1	1	S	6	7	0.130398	S	5	5	0.100773	S	4	4	0.116324	S	6	7
10589	DRAP1	10	R	1	1	0.00157711		0	0	0		0	0	0		0	0	0	A	1	1	0.00226002	S	1	1	0.0027457		0	0	0		0	0	0		0	0	0		0	0	0		0	0	0		0	0
5905	RANGAP1	34	R	1	1	0.00262617		0	0	0		0	0	0	S	3	3	0.012677	S	1	4	0.0158392		0	0	0	S	1	1	0.00274679	S	0.0500621	7	3	S	3	4	0.0352799	S	1	1	0.00172566	S	12	26	0.803236	S	20	52
10985	GCN1	180	S	1	1			0	0	0		0	0	0	S	5	5	0.0147243	A	1	1	0.00511127		0	0	0	S	2	2	0.00304503	S	0.053274	14	13	S	7	8	0.0738223		0	0	0	S	47	59	1.25088	S	105	200
51231	VRK3	28.3333	S	1	1	0.00164974		0	0	0		0	0	0	S	1	1	0.0013495	S	1	1	0.00664548		0	0	0	S	1	1	0.00919863		0	0	0	S	2	2	0.0243657	S	2	2	0.0282451	S	2	2	0.0304718	S	1	1
55681	SCYL2	50	R	1	1	0.00244108		0	0	0		0	0	0	R	2	2	0.0116409	S	2	2	0.00297861		0	0	0		0	0	0	S	0.0527173	6	6	S	3	3	0.0356471		0	0	0	S	14	18	0.382417	S	16	19
6164	RPL34	6	A	1	1	0.00338332		0	0	0		0	0	0		0	0	0	R	1	1	0.00497805		0	0	0	R	1	1	0.00470927		0	0	0	S	1	1	0.0208934	S	1	1	0.0138236	S	1	1	0.0182902	S	3	3
6124	RPL4	27	S	1	1	0.00213516		0	0	0		0	0	0		0	0	0	S	1	1	0.00192031		0	0	0	S	1	1	0.0029574		0	0	0	S	2	2	0.00743599	S	1	1	0.00388531	S	1	1	0.00501468	S	4	5
79840	NHEJ1	13	S	2	2	0.0326162		0	0	0		0	0	0		0	0	0	R	1	1	0.0118368		0	0	0		0	0	0		0	0	0	S	5	8	0.257562	S	4	7	0.183685	S	3	5	0.188504	S	3	3
5437	POLR2H	8.16667	R	1	1	0.00841865		0	0	0		0	0	0		0	0	0	S	1	1	0.00366052		0	0	0		0	0	0		0	0	0	S	5	6	0.346552	S	5	6	0.268699	S	5	6	0.263992	S	4	5
22838	RNF44	12.6	S	1	1	9.62768e-05		0	0	0		0	0	0		0	0	0	R	1	1	0.000884404		0	0	0		0	0	0		0	0	0		0	0	0		0	0	0		0	0	0		0	0
6653	SORL1	116.125	A	1	1	0.00114385		0	0	0		0	0	0		0	0	0	S	1	1	0.0145189		0	0	0		0	0	0		0	0	0		0	0	0		0	0	0		0	0	0		0	0
22820	COPG1	43	S	2	2	0.0101319		0	0	0		0	0	0	S	3	3	0.0118766	S	1	2	0.00700698	A	1	1	0.000648382		0	0	0	S	0.03089	8	7	S	10	11	0.13615	S	1	1	0.00335435	S	17	35	1.17938	S	27	81
7216	TRO	26.7143	A	1	1	0.00405794		0	0	0		0	0	0		0	0	0	S	1	1	0.00160672		0	0	0		0	0	0	S	0.00504463	2	2		0	0	0		0	0	0		0	0	0	A	1	1
345630	FBLL1	25	S	1	1	0.0105268		0	0	0		0	0	0		0	0	0	A	1	1	0	A	1	1	0	S	1	1	0.00897707	A	0	1	1	S	2	4	0.1596	S	2	4	0.0976016	S	2	4	0.187416	S	2	4
6207	RPS13	11	S	1	1	0.00120501		0	0	0		0	0	0	S	1	1	0.00239919		0	0	0	S	1	1	0.00365176	S	1	1	0.00184375	S	0.00353551	1	1	S	2	2	0.0334055	S	3	3	0.0211744	S	2	2	0.0237031	S	5	6
4772	NFATC1	40.0909	S	3	3	0.0181573		0	0	0		0	0	0	S	3	3	0.0143441		0	0	0	R	2	2	0.00831387	S	2	2	0.00617061	A	0.00664124	1	1	S	1	1	0.00552172	S	1	1	0.00438404	S	1	1	0.000840926		0	0
54870	QRICH1	30	S	1	1	0.00772309		0	0	0		0	0	0	S	1	1	0.0118373		0	0	0	A	1	1	0.00724856	S	1	1	0.00792798	S	0.0200645	2	2	S	2	2	0.0413463		0	0	0	S	4	4	0.11441	S	7	9
84991	RBM17	25	S	1	1	0.00447941		0	0	0		0	0	0	S	1	1	0.00247674		0	0	0	R	1	1	0.00377601	S	1	1	0.00438948	R	0.00123158	1	1		0	0	0		0	0	0	S	2	2	0.0182026	S	4	4
79685	SAP30L	7.66667	S	1	1	0.00974612		0	0	0		0	0	0	S	1	1	0.00714403		0	0	0	S	1	1	0.00868802	S	1	1	0.00811186	A	0.00632245	1	1		0	0	0		0	0	0	S	1	1	0.00847127	A	1	1
2624	GATA2	21	S	1	1	0.00735323		0	0	0		0	0	0	S	1	1	0.00538315		0	0	0	S	1	1	0.00699196	S	1	1	0.00923318	S	0.00649694	1	1		0	0	0		0	0	0		0	0	0		0	0
28974	C19orf53	7	S	1	1	0.0188343		0	0	0		0	0	0	S	1	1	0.0142176		0	0	0	S	1	1	0.0211286		0	0	0		0	0	0	S	1	1	0.0551364	S	1	1	0.0442791	S	1	1	0.0443611	S	1	1
83463	MXD3	14	S	1	1	0.00199216		0	0	0		0	0	0	S	1	1	0.00149616		0	0	0	S	1	1	0.00266081		0	0	0		0	0	0		0	0	0		0	0	0		0	0	0		0	0
285600	KIAA0825	72.2308	S	1	1	0.0146261		0	0	0		0	0	0		0	0	0		0	0	0	S	1	1	0.00902639	S	1	1	0.0117087	S	0.0112978	1	1		0	0	0		0	0	0		0	0	0		0	0
285282	RABL3	14.5	A	1	1	0.00140755		0	0	0		0	0	0		0	0	0		0	0	0	A	1	1	0.0270438		0	0	0	A	0.00221387	1	1	S	1	1	0.0633059	S	1	1	0.00384086		0	0	0		0	0
84108	PCGF6	15.5	R	1	1	0.00386996		0	0	0		0	0	0		0	0	0		0	0	0	S	1	1	0.00570109		0	0	0		0	0	0	S	3	3	0.0167857	S	2	2	0.014555	S	2	2	0.0177961		0	0
10297	APC2	148	A	1	1	0.00989837		0	0	0		0	0	0		0	0	0		0	0	0	A	1	1	0.00369849		0	0	0		0	0	0	S	1	1	0.0081354		0	0	0		0	0	0		0	0
51596	CUTA	8	S	1	1	0.00331789		0	0	0		0	0	0		0	0	0		0	0	0	S	1	1	0.00259725		0	0	0		0	0	0		0	0	0		0	0	0		0	0	0		0	0
5784	PTPN14	69	S	1	1	0.00109212		0	0	0		0	0	0		0	0	0		0	0	0	A	1	1	0.000577242		0	0	0		0	0	0		0	0	0		0	0	0		0	0	0		0	0
7203	CCT3	36.5	S	1	1	0.00234972		0	0	0		0	0	0	S	2	2	0.00821756		0	0	0		0	0	0	S	1	1	0.00313398	S	0.0245098	4	4	S	10	12	0.459765	S	5	5	0.0339555	S	22	47	2.82221	S	20	57
6633	SNRPD2	7.5	S	1	1	0.0291675		0	0	0		0	0	0	S	1	1	0.0205495		0	0	0		0	0	0	S	1	1	0.0334827	S	0.0340472	2	2	S	2	2	0.0884757	S	2	2	0.050518	S	1	1	0.0181506	S	4	6
7220	TRPC1	41.4	A	1	1	0.00691683		0	0	0		0	0	0	A	1	1	0.005733		0	0	0		0	0	0	A	1	1	0.0028617	A	0.00309893	1	1	S	1	1	0.011973	S	1	1	0.006043	S	1	1	0.0136994	R	1	1
8208	CHAF1B	30	S	1	1	0.0031197		0	0	0		0	0	0	S	1	1	0.00176055		0	0	0		0	0	0	R	1	1	0.00177664	S	0.00281142	1	1	S	2	2	0.0159891	S	1	1	0.00501491	S	3	3	0.0333862	S	2	2
26156	RSL1D1	26	A	1	1	0.0126136		0	0	0		0	0	0	S	2	2	0.0105762		0	0	0		0	0	0	S	1	1	0.00290233	A	0.0120807	1	1	S	1	1	0.0138117		0	0	0	S	2	3	0.0456542	S	3	4
51692	CPSF3	38.25	R	2	2	0.00844141		0	0	0		0	0	0	S	2	3	0.00802981		0	0	0		0	0	0	S	1	1	0.0028277	R	0.00375433	1	1		0	0	0	S	1	1	0.00403237	S	2	2	0.0153778	S	7	9
54464	XRN1	79.5	S	2	2	0.00313626		0	0	0		0	0	0	S	3	3	0.00632897		0	0	0		0	0	0	S	1	1	0.00206334	S	0.010462	3	3		0	0	0	S	1	1	0.000400569		0	0	0	S	2	2
9500	MAGED1	39	S	2	2	0.0109071		0	0	0		0	0	0	R	1	1	0.00427485		0	0	0		0	0	0	R	1	1	0.0039263	R	0.0101636	2	2		0	0	0		0	0	0		0	0	0	A	1	2
122060	SLAIN1	24.1667	R	1	1	0.00137909		0	0	0		0	0	0	S	1	1	0.000664634		0	0	0		0	0	0	R	1	1	0.000499153	S	0.000322952	1	1		0	0	0		0	0	0		0	0	0		0	0
1869	E2F1	21	A	1	1	0.00141288		0	0	0		0	0	0	R	1	1	0.00403731		0	0	0		0	0	0	A	1	1	0.00164244		0	0	0	S	1	1	0.00736122	S	3	3	0.0273306	S	2	2	0.0108556	S	1	1
6242	RTKN	28.5	S	1	1	0.00288225		0	0	0		0	0	0	S	2	2	0.00594471		0	0	0		0	0	0	R	1	1	0.00371924		0	0	0	S	1	1	0.0145062	S	1	1	0.00482063	S	5	5	0.137921	S	4	4
7874	USP7	67.6667	A	1	1	0.00302478		0	0	0		0	0	0	A	1	1	0.000611346		0	0	0		0	0	0	A	1	1	0.00164698		0	0	0	S	1	1	0.00359047		0	0	0	S	1	1	0.00447931	S	4	5
2649	NR6A1	28.8	A	1	2	0.00176549		0	0	0		0	0	0	A	1	6	0.00612892		0	0	0		0	0	0	A	1	2	0.00294276		0	0	0	S	1	1	0.0184311		0	0	0		0	0	0		0	0
9055	PRC1	36.8235	S	1	1	0.00447941		0	0	0		0	0	0	S	1	1	0.00247674		0	0	0		0	0	0	S	1	1	0.00438948		0	0	0		0	0	0		0	0	0	S	1	1	0.0089807	S	3	3
90861	JPT2	13	R	1	1	0.00157935		0	0	0		0	0	0	S	1	1	0.00246813		0	0	0		0	0	0	R	1	1	0.00216069		0	0	0		0	0	0		0	0	0		0	0	0		0	0
155435	RBM33	54	A	1	1	0.00492362		0	0	0		0	0	0	R	1	1	0.00281979		0	0	0		0	0	0		0	0	0	R	0.00527179	1	1	S	1	1	0.0189406	S	1	1	0.00797909	S	3	3	0.0805399	S	4	5
1315	COPB1	59	R	1	1	0.00210485		0	0	0		0	0	0	R	1	1	0.0033173		0	0	0		0	0	0		0	0	0	S	0.0148777	4	3	S	3	3	0.0504803		0	0	0	S	8	8	0.207408	S	22	53
23774	BRD1	62.5	R	1	1	0.000899327		0	0	0		0	0	0	A	1	1	0.00168656		0	0	0		0	0	0		0	0	0	S	0.00148394	1	1		0	0	0		0	0	0		0	0	0	S	1	1
9767	JADE3	49	S	1	1	0.00504044		0	0	0		0	0	0	R	1	1	0.0020079		0	0	0		0	0	0		0	0	0		0	0	0	S	1	1	0.0147876	S	1	1	0.00696071	S	1	1	0.0202646	S	3	3
50804	MYEF2	28.875	S	2	2	0.0132268		0	0	0		0	0	0	S	1	1	0.00597595		0	0	0		0	0	0		0	0	0		0	0	0	S	2	2	0.0107454	S	1	1	0.00577692	S	3	3	0.0279584	S	1	1
25909	AHCTF1	97.6	R	1	1	0.00289024		0	0	0		0	0	0	S	1	1	0.00334711		0	0	0		0	0	0		0	0	0		0	0	0	S	2	2	0.00860155		0	0	0	S	1	1	0.00803954		0	0
5307	PITX1	14	A	1	1			0	0	0		0	0	0	A	1	1	0.00406639		0	0	0		0	0	0		0	0	0		0	0	0	S	1	1		S	1	1	0.0124053	S	1	1	0.00715954	R	1	1
1660	DHX9	80	A	1	1	0.00724892		0	0	0		0	0	0	S	1	1	0.00332287		0	0	0		0	0	0		0	0	0		0	0	0		0	0	0	S	1	1	0.0053879	S	1	1	0.00964274	S	4	4
7469	NELFA	29	S	1	1	0.000983904		0	0	0		0	0	0	R	1	1	0.000571408		0	0	0		0	0	0		0	0	0		0	0	0		0	0	0		0	0	0	S	5	5	0.0714839	S	8	12
84700	MYO18B	164.727	A	1	1	0.0176791		0	0	0		0	0	0	S	1	1			0	0	0		0	0	0		0	0	0		0	0	0		0	0	0		0	0	0		0	0	0		0	0
10763	NES	106	R	1	1	0.643013		0	0	0		0	0	0	S	1	1	0.313216		0	0	0		0	0	0		0	0	0		0	0	0		0	0	0		0	0	0		0	0	0		0	0
84614	ZBTB37	22	S	1	1	0.00974973		0	0	0		0	0	0	S	1	1			0	0	0		0	0	0		0	0	0		0	0	0		0	0	0		0	0	0		0	0	0		0	0
57187	THOC2	78.7143	R	1	1	0.00473343		0	0	0		0	0	0		0	0	0		0	0	0		0	0	0	S	1	1	0.00312106	R	0.00540017	1	1	S	5	7	0.0724628	S	3	3	0.0290598	S	4	6	0.0726174	S	7	9
5339	PLEC	175.045	S	1	1	0.00569043		0	0	0		0	0	0		0	0	0		0	0	0		0	0	0	A	1	1	0.00312144	A		1	1	S	1	1	0.0556128		0	0	0	S	3	3	0.0103606	S	15	15
25937	WWTR1	18	S	2	2	0.0053471		0	0	0		0	0	0		0	0	0		0	0	0		0	0	0	R	1	1	0.00288787		0	0	0	S	3	3	0.0518918	S	4	5	0.0836358	S	3	3	0.0499208	S	2	3
115950	ZNF653	25	S	1	1	0.0104088		0	0	0		0	0	0		0	0	0		0	0	0		0	0	0	R	1	1	0.00629469		0	0	0	S	2	2	0.0129684	S	1	1	0.0068207	S	1	1	0.0108436	S	1	1
8898	MTMR2	35.5	A	1	1	0.0114335		0	0	0		0	0	0		0	0	0		0	0	0		0	0	0	A	1	1	0.0105452		0	0	0	S	1	1	0.00666963	S	1	1	0.0032215	S	1	1	0.00935921		0	0
1452	CSNK1A1	20	S	2	2	0.00756838		0	0	0		0	0	0		0	0	0		0	0	0		0	0	0	S	1	1	0.00335261		0	0	0	S	2	2	0.0206645	S	1	1	0.00312615	S	2	2	0.0332264	S	6	6
7270	TTF1	38.5	R	1	2	0.00262781		0	0	0		0	0	0		0	0	0		0	0	0		0	0	0	R	1	1	0.000785213		0	0	0	S	1	1	0.00204684		0	0	0	S	1	1	0.00154246		0	0
55510	DDX43	42	A	1	1	0.0169383		0	0	0		0	0	0		0	0	0		0	0	0		0	0	0	R	1	1	0.010056		0	0	0	S	1	1	0.0606294		0	0	0	S	1	1	0.0441114	A	1	1
100129792	CCDC152	20	A	1	3	0.029633		0	0	0		0	0	0		0	0	0		0	0	0		0	0	0	A	1	1	0.0160578		0	0	0		0	0	0		0	0	0	S	1	3	0.00642157	A	1	1
54477	PLEKHA5	66.65	R	1	1	0.000377354		0	0	0		0	0	0		0	0	0		0	0	0		0	0	0	S	1	1	0.00419393		0	0	0		0	0	0		0	0	0		0	0	0		0	0
2296	FOXC1	20	S	1	1	0.00802293		0	0	0		0	0	0		0	0	0		0	0	0		0	0	0		0	0	0	A	0.0175376	2	2	S	5	5	0.105244	S	5	7	0.194449	S	5	6	0.154832	S	3	5
58155	PTBP2	25.7	S	1	1	0.0237734		0	0	0		0	0	0		0	0	0		0	0	0		0	0	0		0	0	0	S	0.0451175	1	1	S	1	2	0.0945789	S	1	2	0.0780643	S	3	5	0.409347	S	12	16
6427	SRSF2	11	A	1	1	0.00361682		0	0	0		0	0	0		0	0	0		0	0	0		0	0	0		0	0	0	R	0.00400904	1	1	S	1	2	0.0293027	S	1	2	0.0190973	S	1	1	0.0144068	S	3	5
148229	ATP8B3	66.9	A	1	1	0.00222184		0	0	0		0	0	0		0	0	0		0	0	0		0	0	0		0	0	0	A	0.00303203	1	1		0	0	0	S	1	1	0.0105694	S	1	1	0.0108112		0	0
51780	KDM3B	95.3333	A	1	1	0.00664396		0	0	0		0	0	0		0	0	0		0	0	0		0	0	0		0	0	0	S	0.0075106	3	3		0	0	0		0	0	0	S	9	10	0.158397	S	18	25
83451	ABHD11	17.5	A	1	1	0.095421		0	0	0		0	0	0		0	0	0		0	0	0		0	0	0		0	0	0	A	0.0389075	1	1		0	0	0		0	0	0	S	1	1	0.0029327		0	0
6208	RPS14	7	S	1	1	0.00429233		0	0	0		0	0	0		0	0	0		0	0	0		0	0	0		0	0	0		0	0	0	S	2	2	0.0368622	S	2	2	0.0240074	S	3	3	0.0473754	S	4	6
4736	RPL10A	10	R	1	1	0.00384884		0	0	0		0	0	0		0	0	0		0	0	0		0	0	0		0	0	0		0	0	0	S	2	2	0.0282187	S	2	2	0.0359244	S	2	2	0.0292484	S	3	3
6625	SNRNP70	14	A	1	1	0.0098552		0	0	0		0	0	0		0	0	0		0	0	0		0	0	0		0	0	0		0	0	0	S	3	3	0.0209828	S	3	3	0.0148825	S	2	2	0.0109745	S	2	2
23210	JMJD6	18.5	R	1	1	0.00296231		0	0	0		0	0	0		0	0	0		0	0	0		0	0	0		0	0	0		0	0	0	S	2	2	0.0187663	S	2	2	0.0153923	S	1	1	0.0116599	S	1	1
8510	MMP23B	26	A	1	1	0.0210457		0	0	0		0	0	0		0	0	0		0	0	0		0	0	0		0	0	0		0	0	0	S	1	1	0.0284055	S	1	1	0.0213938	S	1	1	0.0202147		0	0
84271	POLDIP3	22.6667	R	1	1	0.00226385		0	0	0		0	0	0		0	0	0		0	0	0		0	0	0		0	0	0		0	0	0	S	3	3	0.019182	S	3	3	0.0269171	S	7	7	0.105171	S	3	3
84515	MCM8	47.4286	S	2	2	0.00739272		0	0	0		0	0	0		0	0	0		0	0	0		0	0	0		0	0	0		0	0	0	S	3	3	0.0303879	S	4	4	0.0303474		0	0	0		0	0
2187	FANCB	59	S	1	1	0.000938497		0	0	0		0	0	0		0	0	0		0	0	0		0	0	0		0	0	0		0	0	0	S	1	1	0.00213804	S	1	1	0.00216115		0	0	0		0	0
6165	RPL35A	9	S	1	1	0.00861426		0	0	0		0	0	0		0	0	0		0	0	0		0	0	0		0	0	0		0	0	0	S	1	2	0.00742219	S	1	1	0.00674858		0	0	0	S	3	3
5153	PDE1B	22.5714	A	1	1	0.00308395		0	0	0		0	0	0		0	0	0		0	0	0		0	0	0		0	0	0		0	0	0	S	1	3	0.0712174	S	1	1	0.0158937		0	0	0		0	0
84930	MASTL	46.6875	R	1	1	0.00246546		0	0	0		0	0	0		0	0	0		0	0	0		0	0	0		0	0	0		0	0	0	S	2	2	0.0487569	S	1	1	0.00345923	S	1	2	0.00666726	S	2	2
8539	API5	22.7143	A	1	1	0.0081687		0	0	0		0	0	0		0	0	0		0	0	0		0	0	0		0	0	0		0	0	0	S	1	1	0.00503898		0	0	0	S	4	4	0.0377628	S	13	16
5331	PLCB3	58.75	A	1	1	0.00269594		0	0	0		0	0	0		0	0	0		0	0	0		0	0	0		0	0	0		0	0	0	S	1	1	0.0126477		0	0	0		0	0	0		0	0
84667	HES7	13.6667	A	1	1	0.00876569		0	0	0		0	0	0		0	0	0		0	0	0		0	0	0		0	0	0		0	0	0	S	1	1	0.0228784		0	0	0		0	0	0		0	0
5090	PBX3	16.25	S	1	1	0.00864111		0	0	0		0	0	0		0	0	0		0	0	0		0	0	0		0	0	0		0	0	0		0	0	0	S	2	2	0.0206048	S	1	1	0.0254378	R	2	2
122786	FRMD6	29.4	A	1	1	0.00150021		0	0	0		0	0	0		0	0	0		0	0	0		0	0	0		0	0	0		0	0	0		0	0	0	S	2	2	0.00528316	S	1	1	0.00406526	S	6	6
667	DST	422.564	A	1	1	0.0060021		0	0	0		0	0	0		0	0	0		0	0	0		0	0	0		0	0	0		0	0	0		0	0	0	S	1	1	1.0846	S	2	2	0.0435189		0	0
65267	WNK3	90.5	A	1	1	0.00161484		0	0	0		0	0	0		0	0	0		0	0	0		0	0	0		0	0	0		0	0	0		0	0	0	S	1	1	0.0021454		0	0	0		0	0
6156	RPL30	8	R	1	1	0.00179929		0	0	0		0	0	0		0	0	0		0	0	0		0	0	0		0	0	0		0	0	0		0	0	0	S	1	1	0.00788495		0	0	0	R	1	1
146956	EME1	29.2	R	1	1	0.000839328		0	0	0		0	0	0		0	0	0		0	0	0		0	0	0		0	0	0		0	0	0		0	0	0	S	1	1	0.0050942		0	0	0		0	0
84807	NFKBID	15.875	A	1	2	0.0188308		0	0	0		0	0	0		0	0	0		0	0	0		0	0	0		0	0	0		0	0	0		0	0	0	S	1	1	0.000193387		0	0	0		0	0
79084	WDR77	14.5	S	1	1	0.00148307		0	0	0		0	0	0		0	0	0		0	0	0		0	0	0		0	0	0		0	0	0		0	0	0		0	0	0	S	1	1	0.00610514	S	2	2
55770	EXOC2	53	A	1	1	0.0055179		0	0	0		0	0	0		0	0	0		0	0	0		0	0	0		0	0	0		0	0	0		0	0	0		0	0	0	S	4	4	0.0385778	S	22	28
57519	STARD9	249	A	1	1	0.00316493		0	0	0		0	0	0		0	0	0		0	0	0		0	0	0		0	0	0		0	0	0		0	0	0		0	0	0	S	1	1	0.0167684	A	1	1
9639	ARHGEF10	64.2222	R	1	1	0.00902483		0	0	0		0	0	0		0	0	0		0	0	0		0	0	0		0	0	0		0	0	0		0	0	0		0	0	0	S	1	1	0.0071469		0	0
51270	TFDP3	20	A	1	1	0.0297878		0	0	0		0	0	0		0	0	0		0	0	0		0	0	0		0	0	0		0	0	0		0	0	0		0	0	0	S	1	2	0.109946		0	0
51347	TAOK3	39.4286	A	1	1	0.00888505		0	0	0		0	0	0		0	0	0		0	0	0		0	0	0		0	0	0		0	0	0		0	0	0		0	0	0	S	1	1	0.00194542	R	1	1
55120	FANCL	20.75	S	1	1	0.00245143		0	0	0		0	0	0		0	0	0		0	0	0		0	0	0		0	0	0		0	0	0		0	0	0		0	0	0		0	0	0		0	0
23301	EHBP1	72.6667	S	1	1	0.00521952		0	0	0		0	0	0		0	0	0		0	0	0		0	0	0		0	0	0		0	0	0		0	0	0		0	0	0		0	0	0		0	0
57658	CALCOCO1	36.2	S	1	1	0.0102052		0	0	0		0	0	0		0	0	0		0	0	0		0	0	0		0	0	0		0	0	0		0	0	0		0	0	0		0	0	0		0	0
3550	IK	30	R	1	1	0.00228782		0	0	0		0	0	0		0	0	0		0	0	0		0	0	0		0	0	0		0	0	0		0	0	0		0	0	0		0	0	0	S	3	4
10284	SAP18	13.5	S	1	1	0.00177455		0	0	0		0	0	0		0	0	0		0	0	0		0	0	0		0	0	0		0	0	0		0	0	0		0	0	0		0	0	0	S	2	2
140699	MROH8	46	R	1	1	0.00795044		0	0	0		0	0	0		0	0	0		0	0	0		0	0	0		0	0	0		0	0	0		0	0	0		0	0	0		0	0	0		0	0
191	AHCY	22.5	S	1	1	0.00221315		0	0	0		0	0	0		0	0	0		0	0	0		0	0	0		0	0	0		0	0	0		0	0	0		0	0	0		0	0	0		0	0
7776	ZNF236	76.6	S	1	1	0.00208711		0	0	0		0	0	0		0	0	0		0	0	0		0	0	0		0	0	0		0	0	0		0	0	0		0	0	0		0	0	0		0	0
285175	UNC80	173.476	S	1	1	0.00702164		0	0	0		0	0	0		0	0	0		0	0	0		0	0	0		0	0	0		0	0	0		0	0	0		0	0	0		0	0	0		0	0
54443	ANLN	63.5	S	1	1	0.00778498		0	0	0		0	0	0		0	0	0		0	0	0		0	0	0		0	0	0		0	0	0		0	0	0		0	0	0		0	0	0		0	0
6493	SIM2	28.75	S	1	1	0.000918795		0	0	0		0	0	0		0	0	0		0	0	0		0	0	0		0	0	0		0	0	0		0	0	0		0	0	0		0	0	0		0	0
23180	RFTN1	27.1667	S	1	1	0.00593086		0	0	0		0	0	0		0	0	0		0	0	0		0	0	0		0	0	0		0	0	0		0	0	0		0	0	0		0	0	0		0	0
6907	TBL1X	30.5	S	4	4	0.0217434	S	6	7	0.0507949	S	8	12	0.0987254	S	8	10	0.0949874	S	6	7	0.0244394	S	6	7	0.0895972	S	8	10	0.156279	S	0.142077	10	8	S	10	13	0.412967	S	7	9	0.234117	S	11	19	0.537529	S	9	14
2261	FGFR3	40.5833	R	1	1	0.00138056	S	2	4	0.0313138	R	1	1	0.00195335	S	2	2	0.0621177	S	2	2	0.0556924	S	1	1	0.00103695	S	3	4	0.0852515	A	0.00151017	2	1	S	1	3	0.0065357	S	2	2	0.0987148	S	1	3	0.00863428	S	1	3
58	ACTA1	23	S	13	32	1.73973	S	11	32	1.51607	S	14	34	2.09735	S	13	28	0.972805	S	14	31	1.61999	S	10	24	1.28847	S	10	25	1.53045	S	2.43065	25	10	S	17	47	3.03126	S	19	57	6.86751	S	21	56	3.91426	S	20	67
8554	PIAS1	35	S	1	1	0.00289486	S	1	1	0.00370804	S	2	3	0.019295	S	1	1	0.00435519	S	2	2	0.0115961	S	1	1	0.00468937	S	1	1	0.00642911	S	0.0215784	2	2	A	1	2	0	A	1	2	0	S	1	2	0.0139875	A	1	2
6628	SNRPB	16.5	S	1	1	0.00433664	S	3	3	0.0217919	S	4	4	0.0518499	S	2	2	0.00909065	S	3	3	0.0184635	S	4	4	0.0503985	S	3	3	0.0172815	S	0.0527926	4	4	S	3	3	0.0493647	S	1	1	0.0130814	S	1	1	0.0265474	S	5	8
1746	DLX2	10	S	2	3	0.0324353	S	3	4	0.0615453	S	3	4	0.0659499	S	2	2	0.0102718	S	4	4	0.0551087	S	3	4	0.0711626	S	4	5	0.0742816	S	0.0345067	3	2	S	3	4	0.0653308	S	4	4	0.0901558	S	4	4	0.0746736	S	3	3
1457	CSNK2A1	17	S	3	3	0.0171255	S	3	3	0.0195837	S	5	5	0.0744978		0	0	0	S	2	2	0.0125352	S	3	3	0.0214128	R	3	3	0.0245848	S	0.0196146	3	3	S	5	7	0.295978	S	6	7	0.282292	S	7	11	0.509468	S	10	19
5515	PPP2CA	17	S	1	1	0.00268547	S	1	1	0.00223801	S	3	3	0.0547232		0	0	0		0	0	0		0	0	0	A	1	1	0.00208967	S	0.00172929	1	1	A	2	3	0	A	1	1	0	A	4	6	0	S	3	3
26986	PABPC1	44	R	1	1		S	2	2	0.00526159	S	3	3	0.0223514	S	3	3	0.015459	R	1	1	0.00382704	S	1	1	0.00453233	S	2	2	0.0147807	S	0.0154531	2	2	S	3	4	0.0563547	S	1	1	0.00640747	S	3	4	0.0777449	S	4	7
22828	SCAF8	63.5	S	1	2	0.00679684	S	1	1	0.00445864	S	2	3	0.00679877	S	3	4	0.0128175	S	1	1	0.00648231	S	2	2	0.00489841	S	1	1	0.00533751	S	0.024468	4	3	S	5	5	0.0566196		0	0	0	S	10	18	0.38638	S	8	14
3303	HSPA1A	38	S	24	72	3.27822	S	22	81	3.17025	S	33	94	5.3844	S	27	74	3.24253	S	28	65	3.52382	S	28	81	4.16734	S	28	82	4.85609	S	4.31044	85	28	S	34	125	6.98851	S	35	124	5.86214	S	36	136	8.51502	S	38	118
3304	HSPA1B	38	S	24	72	3.27822	S	22	81	3.17025	S	33	94	5.3844	S	27	74	3.24253	S	28	65	3.52382	S	28	81	4.16734	S	28	82	4.85609	S	4.31044	85	28	S	34	125	6.98851	S	35	124	5.86214	S	36	136	8.51502	S	38	118
10376	TUBA1B	26	S	20	80	6.90028	S	18	77	7.02715	S	21	87	9.28745	S	22	57	3.23025	S	22	99	8.7559	S	21	88	8.27822	S	24	84	7.96508	S	7.32953	85	23	S	26	107	32.9079	S	26	108	27.6096	S	29	139	56.4844	S	31	169
60	ACTB	23	S	17	43	3.27402	S	14	49	2.77963	S	18	52	4.45914	S	19	42	1.98558	S	18	46	3.03258	S	15	41	3.00247	S	14	41	3.46852	S	3.3267	40	14	S	21	74	7.32886	S	21	86	8.78667	S	22	83	8.80506	S	22	94
71	ACTG1	23	S	17	43	3.27402	S	14	49	2.77963	S	18	52	4.45914	S	19	42	1.98558	S	18	46	3.03258	S	15	41	3.00247	S	14	41	3.46852	S	3.3267	40	14	S	21	74	7.32886	S	21	86	8.78667	S	22	83	8.80506	S	22	94
8294	HIST1H4I	6	S	10	30	0.105526	S	10	27	0.148316	S	12	31	0.220428	S	11	30	0.0860761	S	14	34	0.18608	S	12	33	0.173284	S	11	31	0.141936	S	0.142131	33	11	S	9	24	0.120354	S	9	32	0.103182	S	7	21	0.0781393	S	9	20
8359	HIST1H4A	6	S	10	30	0.105526	S	10	27	0.148316	S	12	31	0.220428	S	11	30	0.0860761	S	14	34	0.18608	S	12	33	0.173284	S	11	31	0.141936	S	0.142131	33	11	S	9	24	0.120354	S	9	32	0.103182	S	7	21	0.0781393	S	9	20
8360	HIST1H4D	6	S	10	30	0.105526	S	10	27	0.148316	S	12	31	0.220428	S	11	30	0.0860761	S	14	34	0.18608	S	12	33	0.173284	S	11	31	0.141936	S	0.142131	33	11	S	9	24	0.120354	S	9	32	0.103182	S	7	21	0.0781393	S	9	20
8361	HIST1H4F	6	S	10	30	0.105526	S	10	27	0.148316	S	12	31	0.220428	S	11	30	0.0860761	S	14	34	0.18608	S	12	33	0.173284	S	11	31	0.141936	S	0.142131	33	11	S	9	24	0.120354	S	9	32	0.103182	S	7	21	0.0781393	S	9	20
8362	HIST1H4K	6	S	10	30	0.105526	S	10	27	0.148316	S	12	31	0.220428	S	11	30	0.0860761	S	14	34	0.18608	S	12	33	0.173284	S	11	31	0.141936	S	0.142131	33	11	S	9	24	0.120354	S	9	32	0.103182	S	7	21	0.0781393	S	9	20
8363	HIST1H4J	6	S	10	30	0.105526	S	10	27	0.148316	S	12	31	0.220428	S	11	30	0.0860761	S	14	34	0.18608	S	12	33	0.173284	S	11	31	0.141936	S	0.142131	33	11	S	9	24	0.120354	S	9	32	0.103182	S	7	21	0.0781393	S	9	20
8364	HIST1H4C	6	S	10	30	0.105526	S	10	27	0.148316	S	12	31	0.220428	S	11	30	0.0860761	S	14	34	0.18608	S	12	33	0.173284	S	11	31	0.141936	S	0.142131	33	11	S	9	24	0.120354	S	9	32	0.103182	S	7	21	0.0781393	S	9	20
8365	HIST1H4H	6	S	10	30	0.105526	S	10	27	0.148316	S	12	31	0.220428	S	11	30	0.0860761	S	14	34	0.18608	S	12	33	0.173284	S	11	31	0.141936	S	0.142131	33	11	S	9	24	0.120354	S	9	32	0.103182	S	7	21	0.0781393	S	9	20
8366	HIST1H4B	6	S	10	30	0.105526	S	10	27	0.148316	S	12	31	0.220428	S	11	30	0.0860761	S	14	34	0.18608	S	12	33	0.173284	S	11	31	0.141936	S	0.142131	33	11	S	9	24	0.120354	S	9	32	0.103182	S	7	21	0.0781393	S	9	20
8367	HIST1H4E	6	S	10	30	0.105526	S	10	27	0.148316	S	12	31	0.220428	S	11	30	0.0860761	S	14	34	0.18608	S	12	33	0.173284	S	11	31	0.141936	S	0.142131	33	11	S	9	24	0.120354	S	9	32	0.103182	S	7	21	0.0781393	S	9	20
8368	HIST1H4L	6	S	10	30	0.105526	S	10	27	0.148316	S	12	31	0.220428	S	11	30	0.0860761	S	14	34	0.18608	S	12	33	0.173284	S	11	31	0.141936	S	0.142131	33	11	S	9	24	0.120354	S	9	32	0.103182	S	7	21	0.0781393	S	9	20
8370	HIST2H4A	6	S	10	30	0.105526	S	10	27	0.148316	S	12	31	0.220428	S	11	30	0.0860761	S	14	34	0.18608	S	12	33	0.173284	S	11	31	0.141936	S	0.142131	33	11	S	9	24	0.120354	S	9	32	0.103182	S	7	21	0.0781393	S	9	20
121504	HIST4H4	6	S	10	30	0.105526	S	10	27	0.148316	S	12	31	0.220428	S	11	30	0.0860761	S	14	34	0.18608	S	12	33	0.173284	S	11	31	0.141936	S	0.142131	33	11	S	9	24	0.120354	S	9	32	0.103182	S	7	21	0.0781393	S	9	20
554313	HIST2H4B	6	S	10	30	0.105526	S	10	27	0.148316	S	12	31	0.220428	S	11	30	0.0860761	S	14	34	0.18608	S	12	33	0.173284	S	11	31	0.141936	S	0.142131	33	11	S	9	24	0.120354	S	9	32	0.103182	S	7	21	0.0781393	S	9	20
2966	GTF2H2	22.6	S	9	18	0.292361	S	7	14	0.243195	S	10	18	0.325471	S	6	7	0.106934	S	10	18	0.269481	S	10	18	0.269281	S	8	14	0.213913	S	0.198237	12	8	S	10	22	0.398598	S	11	20	0.361713	S	9	19	0.343438	S	12	18
728340	GTF2H2C	18.75	S	9	18	0.292361	S	7	14	0.243195	S	10	18	0.325471	S	6	7	0.106934	S	10	18	0.269481	S	10	18	0.269281	S	8	14	0.213913	S	0.198237	12	8	S	10	22	0.398598	S	11	20	0.361713	S	9	19	0.343438	S	12	18
730394	GTF2H2C_2	24	S	9	18	0.292361	S	7	14	0.243195	S	10	18	0.325471	S	6	7	0.106934	S	10	18	0.269481	S	10	18	0.269281	S	8	14	0.213913	S	0.198237	12	8	S	10	22	0.398598	S	11	20	0.361713	S	9	19	0.343438	S	12	18
3017	HIST1H2BD	11	S	8	29	0.304395	S	4	26	0.327568	S	6	32	0.337734	S	8	25	0.182084	S	10	39	0.361362	S	8	38	0.410255	S	8	33	0.391701	S	0.32393	29	6	S	11	53	1.2052	S	14	62	0.785752	S	11	50	0.726029	S	5	38
8339	HIST1H2BG	11	S	8	29	0.304395	S	4	26	0.327568	S	6	32	0.337734	S	8	25	0.182084	S	10	39	0.361362	S	8	38	0.410255	S	8	33	0.391701	S	0.32393	29	6	S	11	53	1.2052	S	14	62	0.785752	S	11	50	0.726029	S	5	38
8341	HIST1H2BN	11	S	8	29	0.304395	S	4	26	0.327568	S	6	32	0.337734	S	8	25	0.182084	S	10	39	0.361362	S	8	38	0.410255	S	8	33	0.391701	S	0.32393	29	6	S	11	53	1.2052	S	14	62	0.785752	S	11	50	0.726029	S	5	38
8342	HIST1H2BM	11	S	8	29	0.304395	S	4	26	0.327568	S	6	32	0.337734	S	8	25	0.182084	S	10	39	0.361362	S	8	38	0.410255	S	8	33	0.391701	S	0.32393	29	6	S	11	53	1.2052	S	14	62	0.785752	S	11	50	0.726029	S	5	38
8343	HIST1H2BF	11	S	8	29	0.304395	S	4	26	0.327568	S	6	32	0.337734	S	8	25	0.182084	S	10	39	0.361362	S	8	38	0.410255	S	8	33	0.391701	S	0.32393	29	6	S	11	53	1.2052	S	14	62	0.785752	S	11	50	0.726029	S	5	38
8344	HIST1H2BE	11	S	8	29	0.304395	S	4	26	0.327568	S	6	32	0.337734	S	8	25	0.182084	S	10	39	0.361362	S	8	38	0.410255	S	8	33	0.391701	S	0.32393	29	6	S	11	53	1.2052	S	14	62	0.785752	S	11	50	0.726029	S	5	38
8345	HIST1H2BH	11	S	8	29	0.304395	S	4	26	0.327568	S	6	32	0.337734	S	8	25	0.182084	S	10	39	0.361362	S	8	38	0.410255	S	8	33	0.391701	S	0.32393	29	6	S	11	53	1.2052	S	14	62	0.785752	S	11	50	0.726029	S	5	38
8346	HIST1H2BI	11	S	8	29	0.304395	S	4	26	0.327568	S	6	32	0.337734	S	8	25	0.182084	S	10	39	0.361362	S	8	38	0.410255	S	8	33	0.391701	S	0.32393	29	6	S	11	53	1.2052	S	14	62	0.785752	S	11	50	0.726029	S	5	38
8347	HIST1H2BC	11	S	8	29	0.304395	S	4	26	0.327568	S	6	32	0.337734	S	8	25	0.182084	S	10	39	0.361362	S	8	38	0.410255	S	8	33	0.391701	S	0.32393	29	6	S	11	53	1.2052	S	14	62	0.785752	S	11	50	0.726029	S	5	38
85236	HIST1H2BK	11	S	8	29	0.304395	S	4	26	0.327568	S	6	32	0.337734	S	8	25	0.182084	S	10	39	0.361362	S	8	38	0.410255	S	8	33	0.391701	S	0.32393	29	6	S	11	53	1.2052	S	14	62	0.785752	S	11	50	0.726029	S	5	38
440689	HIST2H2BF	11.5	S	8	29	0.304395	S	4	26	0.327568	S	6	32	0.337734	S	8	25	0.182084	S	10	39	0.361362	S	8	38	0.410255	S	8	33	0.391701	S	0.32393	29	6	S	11	53	1.2052	S	14	62	0.785752	S	11	50	0.726029	S	5	38
3018	HIST1H2BB	11	S	6	27	0.933418	S	4	25	0.871864	S	5	31	1.10238	S	7	24	0.583577	S	7	34	1.05026	S	7	36	1.25882	S	6	31	1.18082	S	1.08069	28	6	S	10	50	3.00082	S	14	53	2.33007	S	11	45	2.17923	S	5	36
8348	HIST1H2BO	11	S	6	27	0.933418	S	4	25	0.871864	S	5	31	1.10238	S	7	24	0.583577	S	7	34	1.05026	S	7	36	1.25882	S	6	31	1.18082	S	1.08069	28	6	S	10	50	3.00082	S	14	53	2.33007	S	11	45	2.17923	S	5	36
8349	HIST2H2BE	11	S	6	27	0.933418	S	4	25	0.871864	S	5	31	1.10238	S	7	24	0.583577	S	7	34	1.05026	S	7	36	1.25882	S	6	31	1.18082	S	1.08069	28	6	S	10	50	3.00082	S	14	53	2.33007	S	11	45	2.17923	S	5	36
8970	HIST1H2BJ	11	S	6	27	0.933418	S	4	25	0.871864	S	5	31	1.10238	S	7	24	0.583577	S	7	34	1.05026	S	7	36	1.25882	S	6	31	1.18082	S	1.08069	28	6	S	10	50	3.00082	S	14	53	2.33007	S	11	45	2.17923	S	5	36
5936	RBM4	17.6667	S	6	7	0.038491	S	3	3	0.0139033	S	5	6	0.051856	S	4	4	0.0166744	S	5	6	0.0465252	S	3	3	0.0257802	S	3	3	0.0253043	S	0.033092	5	4	S	5	5	0.0789997	S	4	4	0.0425696	S	3	3	0.0603784	S	4	5
3013	HIST1H2AD	7	S	5	12	0.296763	S	7	19	0.389219	S	6	18	0.500806	S	5	10	0.188836	S	7	20	0.433636	S	8	19	0.454334	S	7	18	0.385157	S	0.366897	14	6	S	7	26	0.970446	S	7	25	0.768553	S	7	22	0.690925	S	7	23
8329	HIST1H2AI	7	S	5	12	0.296763	S	7	19	0.389219	S	6	18	0.500806	S	5	10	0.188836	S	7	20	0.433636	S	8	19	0.454334	S	7	18	0.385157	S	0.366897	14	6	S	7	26	0.970446	S	7	25	0.768553	S	7	22	0.690925	S	7	23
8330	HIST1H2AK	7	S	5	12	0.296763	S	7	19	0.389219	S	6	18	0.500806	S	5	10	0.188836	S	7	20	0.433636	S	8	19	0.454334	S	7	18	0.385157	S	0.366897	14	6	S	7	26	0.970446	S	7	25	0.768553	S	7	22	0.690925	S	7	23
8331	HIST1H2AJ	7	S	5	12	0.296763	S	7	19	0.389219	S	6	18	0.500806	S	5	10	0.188836	S	7	20	0.433636	S	8	19	0.454334	S	7	18	0.385157	S	0.366897	14	6	S	7	26	0.970446	S	7	25	0.768553	S	7	22	0.690925	S	7	23
8332	HIST1H2AL	7	S	5	12	0.296763	S	7	19	0.389219	S	6	18	0.500806	S	5	10	0.188836	S	7	20	0.433636	S	8	19	0.454334	S	7	18	0.385157	S	0.366897	14	6	S	7	26	0.970446	S	7	25	0.768553	S	7	22	0.690925	S	7	23
8336	HIST1H2AM	7	S	5	12	0.296763	S	7	19	0.389219	S	6	18	0.500806	S	5	10	0.188836	S	7	20	0.433636	S	8	19	0.454334	S	7	18	0.385157	S	0.366897	14	6	S	7	26	0.970446	S	7	25	0.768553	S	7	22	0.690925	S	7	23
8337	HIST2H2AA3	7	S	5	12	0.296763	S	7	19	0.389219	S	6	18	0.500806	S	5	10	0.188836	S	7	20	0.433636	S	8	19	0.454334	S	7	18	0.385157	S	0.366897	14	6	S	7	26	0.970446	S	7	25	0.768553	S	7	22	0.690925	S	7	23
8338	HIST2H2AC	6	S	5	12	0.296763	S	7	19	0.389219	S	6	18	0.500806	S	5	10	0.188836	S	7	20	0.433636	S	8	19	0.454334	S	7	18	0.385157	S	0.366897	14	6	S	7	26	0.970446	S	7	25	0.768553	S	7	22	0.690925	S	7	23
8969	HIST1H2AG	7	S	5	12	0.296763	S	7	19	0.389219	S	6	18	0.500806	S	5	10	0.188836	S	7	20	0.433636	S	8	19	0.454334	S	7	18	0.385157	S	0.366897	14	6	S	7	26	0.970446	S	7	25	0.768553	S	7	22	0.690925	S	7	23
55766	H2AFJ	6	S	5	12	0.296763	S	7	19	0.389219	S	6	18	0.500806	S	5	10	0.188836	S	7	20	0.433636	S	8	19	0.454334	S	7	18	0.385157	S	0.366897	14	6	S	7	26	0.970446	S	7	25	0.768553	S	7	22	0.690925	S	7	23
85235	HIST1H2AH	7	S	5	12	0.296763	S	7	19	0.389219	S	6	18	0.500806	S	5	10	0.188836	S	7	20	0.433636	S	8	19	0.454334	S	7	18	0.385157	S	0.366897	14	6	S	7	26	0.970446	S	7	25	0.768553	S	7	22	0.690925	S	7	23
723790	HIST2H2AA4	7	S	5	12	0.296763	S	7	19	0.389219	S	6	18	0.500806	S	5	10	0.188836	S	7	20	0.433636	S	8	19	0.454334	S	7	18	0.385157	S	0.366897	14	6	S	7	26	0.970446	S	7	25	0.768553	S	7	22	0.690925	S	7	23
3012	HIST1H2AE	7	S	5	13	0.861024	S	6	18	1.11479	S	6	18	1.45458	S	5	9	0.546681	S	5	16	1.21699	S	6	17	1.29252	S	5	15	1.0711	S	1.06446	13	5	S	6	20	2.65167	S	5	16	1.9509	S	5	14	1.84882	S	6	17
8334	HIST1H2AC	7	S	5	13	0.861024	S	6	18	1.11479	S	6	18	1.45458	S	5	9	0.546681	S	5	16	1.21699	S	6	17	1.29252	S	5	15	1.0711	S	1.06446	13	5	S	6	20	2.65167	S	5	16	1.9509	S	5	14	1.84882	S	6	17
8335	HIST1H2AB	7	S	5	13	0.861024	S	6	18	1.11479	S	6	18	1.45458	S	5	9	0.546681	S	5	16	1.21699	S	6	17	1.29252	S	5	15	1.0711	S	1.06446	13	5	S	6	20	2.65167	S	5	16	1.9509	S	5	14	1.84882	S	6	17
92815	HIST3H2A	7	S	5	13	0.861024	S	6	18	1.11479	S	6	18	1.45458	S	5	9	0.546681	S	5	16	1.21699	S	6	17	1.29252	S	5	15	1.0711	S	1.06446	13	5	S	6	20	2.65167	S	5	16	1.9509	S	5	14	1.84882	S	6	17
6233	RPS27A	11	S	4	7	0.170842	S	4	9	0.109575	S	4	9	0.131708	S	4	8	0.110133	S	4	6	0.0851518	S	4	9	0.147836	S	4	9	0.119373	S	0.13439	8	4	S	4	7	0.222466	S	4	6	0.103702	S	3	6	0.208089	S	4	10
7311	UBA52	9.2	S	4	7	0.170842	S	4	9	0.109575	S	4	9	0.131708	S	4	8	0.110133	S	4	6	0.0851518	S	4	9	0.147836	S	4	9	0.119373	S	0.13439	8	4	S	4	7	0.222466	S	4	6	0.103702	S	3	6	0.208089	S	4	10
7314	UBB	8	S	4	7	0.170842	S	4	9	0.109575	S	4	9	0.131708	S	4	8	0.110133	S	4	6	0.0851518	S	4	9	0.147836	S	4	9	0.119373	S	0.13439	8	4	S	4	7	0.222466	S	4	6	0.103702	S	3	6	0.208089	S	4	10
7316	UBC	8	S	4	7	0.170842	S	4	9	0.109575	S	4	9	0.131708	S	4	8	0.110133	S	4	6	0.0851518	S	4	9	0.147836	S	4	9	0.119373	S	0.13439	8	4	S	4	7	0.222466	S	4	6	0.103702	S	3	6	0.208089	S	4	10
54145	H2BFS	11	S	8	29	0.304395	S	4	26	0.327568	S	6	32	0.337734	S	8	25	0.182084	S	10	39	0.361362	S	8	38	0.410255	S	8	33	0.391701	S	0.32393	29	6	A	10	52	0	S	14	62	0.785752	S	11	50	0.726029	S	5	38
102724334	LOC102724334	11	S	8	29	0.304395	S	4	26	0.327568	S	6	32	0.337734	S	8	25	0.182084	S	10	39	0.361362	S	8	38	0.410255	S	8	33	0.391701	S	0.32393	29	6	A	10	52	0	S	14	62	0.785752	S	11	50	0.726029	S	5	38
84790	TUBA1C	27.3333	S	20	80	6.90028	S	18	77	7.02715	S	21	87	9.28745	S	22	57	3.23025	S	22	99	8.7559	S	21	88	8.27822	S	24	84	7.96508	S	7.32953	85	23	A	25	105	0	A	25	107	0	A	26	135	0	A	29	166
57466	SCAF4	24	S	1	2	0.00679684	S	1	1	0.00445864	S	2	3	0.00679877	S	3	4	0.0128175	S	1	1	0.00648231	S	2	2	0.00489841	S	1	1	0.00533751	S	0.024468	4	3	A	3	3	0		0	0	0	A	3	7	0	S	5	8
801	CALM1	8.66667	S	2	2	0.00591851	S	1	1	0.00208911	S	2	2	0.00839998	S	1	1	0.001651	S	1	2	0.00577128	R	2	2	0.00380878	R	1	1	0.00202978	S	0.00649424	2	2		0	0	0		0	0	0		0	0	0	S	1	2
805	CALM2	9.33333	S	2	2	0.00591851	S	1	1	0.00208911	S	2	2	0.00839998	S	1	1	0.001651	S	1	2	0.00577128	R	2	2	0.00380878	R	1	1	0.00202978	S	0.00649424	2	2		0	0	0		0	0	0		0	0	0	S	1	2
808	CALM3	8	S	2	2	0.00591851	S	1	1	0.00208911	S	2	2	0.00839998	S	1	1	0.001651	S	1	2	0.00577128	R	2	2	0.00380878	R	1	1	0.00202978	S	0.00649424	2	2		0	0	0		0	0	0		0	0	0	S	1	2
6154	RPL26	9	S	1	1	0.00273227	S	1	1	0.00344191	A	1	1	0.00437519	R	1	1	0.00258278	S	2	2	0.00509039	S	1	1	0.00405264		0	0	0	S	0.00396136	1	1	S	2	2	0.0142978	S	3	4	0.0169381	S	1	1	0.00144067		0	0
51121	RPL26L1	9	S	1	1	0.00273227	S	1	1	0.00344191	A	1	1	0.00437519	R	1	1	0.00258278	S	2	2	0.00509039	S	1	1	0.00405264		0	0	0	S	0.00396136	1	1	S	2	2	0.0142978	S	3	4	0.0169381	S	1	1	0.00144067		0	0
3020	H3F3A	7	S	3	5	0.0421885	S	3	11	0.0427373	S	3	4	0.0591632	A	1	2	0	S	5	5	0.0708899	S	3	4	0.0539891	S	3	5	0.048295	S	0.0448947	4	3	S	4	6	0.054239	S	4	7	0.0526286	S	4	6	0.0310996	S	4	6
3021	H3F3B	7	S	3	5	0.0421885	S	3	11	0.0427373	S	3	4	0.0591632	A	1	2	0	S	5	5	0.0708899	S	3	4	0.0539891	S	3	5	0.048295	S	0.0448947	4	3	S	4	6	0.054239	S	4	7	0.0526286	S	4	6	0.0310996	S	4	6
8290	HIST3H3	7	S	3	5	0.0421885	S	3	11	0.0427373	S	3	4	0.0591632	A	1	2	0	S	5	5	0.0708899	S	3	4	0.0539891	S	3	5	0.048295	S	0.0448947	4	3	S	4	6	0.054239	S	4	7	0.0526286	S	4	6	0.0310996	S	4	6
8350	HIST1H3A	7	S	3	5	0.0421885	S	3	11	0.0427373	S	3	4	0.0591632	A	1	2	0	S	5	5	0.0708899	S	3	4	0.0539891	S	3	5	0.048295	S	0.0448947	4	3	S	4	6	0.054239	S	4	7	0.0526286	S	4	6	0.0310996	S	4	6
8351	HIST1H3D	7	S	3	5	0.0421885	S	3	11	0.0427373	S	3	4	0.0591632	A	1	2	0	S	5	5	0.0708899	S	3	4	0.0539891	S	3	5	0.048295	S	0.0448947	4	3	S	4	6	0.054239	S	4	7	0.0526286	S	4	6	0.0310996	S	4	6
8352	HIST1H3C	7	S	3	5	0.0421885	S	3	11	0.0427373	S	3	4	0.0591632	A	1	2	0	S	5	5	0.0708899	S	3	4	0.0539891	S	3	5	0.048295	S	0.0448947	4	3	S	4	6	0.054239	S	4	7	0.0526286	S	4	6	0.0310996	S	4	6
8353	HIST1H3E	7	S	3	5	0.0421885	S	3	11	0.0427373	S	3	4	0.0591632	A	1	2	0	S	5	5	0.0708899	S	3	4	0.0539891	S	3	5	0.048295	S	0.0448947	4	3	S	4	6	0.054239	S	4	7	0.0526286	S	4	6	0.0310996	S	4	6
8354	HIST1H3I	7	S	3	5	0.0421885	S	3	11	0.0427373	S	3	4	0.0591632	A	1	2	0	S	5	5	0.0708899	S	3	4	0.0539891	S	3	5	0.048295	S	0.0448947	4	3	S	4	6	0.054239	S	4	7	0.0526286	S	4	6	0.0310996	S	4	6
8355	HIST1H3G	7	S	3	5	0.0421885	S	3	11	0.0427373	S	3	4	0.0591632	A	1	2	0	S	5	5	0.0708899	S	3	4	0.0539891	S	3	5	0.048295	S	0.0448947	4	3	S	4	6	0.054239	S	4	7	0.0526286	S	4	6	0.0310996	S	4	6
8356	HIST1H3J	7	S	3	5	0.0421885	S	3	11	0.0427373	S	3	4	0.0591632	A	1	2	0	S	5	5	0.0708899	S	3	4	0.0539891	S	3	5	0.048295	S	0.0448947	4	3	S	4	6	0.054239	S	4	7	0.0526286	S	4	6	0.0310996	S	4	6
8357	HIST1H3H	7	S	3	5	0.0421885	S	3	11	0.0427373	S	3	4	0.0591632	A	1	2	0	S	5	5	0.0708899	S	3	4	0.0539891	S	3	5	0.048295	S	0.0448947	4	3	S	4	6	0.054239	S	4	7	0.0526286	S	4	6	0.0310996	S	4	6
8358	HIST1H3B	7	S	3	5	0.0421885	S	3	11	0.0427373	S	3	4	0.0591632	A	1	2	0	S	5	5	0.0708899	S	3	4	0.0539891	S	3	5	0.048295	S	0.0448947	4	3	S	4	6	0.054239	S	4	7	0.0526286	S	4	6	0.0310996	S	4	6
8968	HIST1H3F	7	S	3	5	0.0421885	S	3	11	0.0427373	S	3	4	0.0591632	A	1	2	0	S	5	5	0.0708899	S	3	4	0.0539891	S	3	5	0.048295	S	0.0448947	4	3	S	4	6	0.054239	S	4	7	0.0526286	S	4	6	0.0310996	S	4	6
126961	HIST2H3C	7	S	3	5	0.0421885	S	3	11	0.0427373	S	3	4	0.0591632	A	1	2	0	S	5	5	0.0708899	S	3	4	0.0539891	S	3	5	0.048295	S	0.0448947	4	3	S	4	6	0.054239	S	4	7	0.0526286	S	4	6	0.0310996	S	4	6
333932	HIST2H3A	7	S	3	5	0.0421885	S	3	11	0.0427373	S	3	4	0.0591632	A	1	2	0	S	5	5	0.0708899	S	3	4	0.0539891	S	3	5	0.048295	S	0.0448947	4	3	S	4	6	0.054239	S	4	7	0.0526286	S	4	6	0.0310996	S	4	6
653604	HIST2H3D	7	S	3	5	0.0421885	S	3	11	0.0427373	S	3	4	0.0591632	A	1	2	0	S	5	5	0.0708899	S	3	4	0.0539891	S	3	5	0.048295	S	0.0448947	4	3	S	4	6	0.054239	S	4	7	0.0526286	S	4	6	0.0310996	S	4	6
6278	S100A7	7	R	1	1	0.00260195	A	1	1	0.00173487	S	1	1	0.00234243		0	0	0	R	1	1	0.000486116	A	1	1	0.00170043	A	1	1	0.00178613		0	0	0		0	0	0		0	0	0		0	0	0		0	0
338324	S100A7A	7	R	1	1	0.00260195	A	1	1	0.00173487	S	1	1	0.00234243		0	0	0	R	1	1	0.000486116	A	1	1	0.00170043	A	1	1	0.00178613		0	0	0		0	0	0		0	0	0		0	0	0		0	0
7307	U2AF1	10.4	S	2	2	0.0210376	S	2	2	0.0132801	S	1	1	0.00104003	S	1	1		S	2	2	0.0222181		0	0	0	S	1	1		S	0.00400674	2	2	S	4	4	0.102416	S	4	5	0.0529151	S	4	5	0.113952	S	5	11
102724594	U2AF1L5	10.3333	S	2	2	0.0210376	S	2	2	0.0132801	S	1	1	0.00104003	S	1	1		S	2	2	0.0222181		0	0	0	S	1	1		S	0.00400674	2	2	S	4	4	0.102416	S	4	5	0.0529151	S	4	5	0.113952	S	5	11
100532731	COMMD3-BMI1	29	A	1	1	0.00207703	A	1	1	0.00158869	A	1	1	0.00221529		0	0	0	A	2	2	0.00656797		0	0	0		0	0	0	A	0.00176241	1	1	S	1	1	0.00287702	S	1	1	0.00189231	S	3	3	0.0508445	S	3	3
648	BMI1	17	A	1	1	0.00207703	A	1	1	0.00158869	A	1	1	0.00221529		0	0	0	A	2	2	0.00656797		0	0	0		0	0	0	A	0.00176241	1	1	S	1	1	0.00287702	S	1	1	0.00189231	A	2	2	0	A	1	1
7703	PCGF2	19	A	1	1	0.00207703	A	1	1	0.00158869	A	1	1	0.00221529		0	0	0	A	1	1	0		0	0	0		0	0	0	A	0.00176241	1	1	S	1	1	0.00287702	S	1	1	0.00189231	A	2	2	0	A	1	1
5870	RAB6A	14	S	1	1	0.00582043	S	1	1	0.00700162	S	1	3	0.0246758	S	1	1	0.00904159		0	0	0	S	1	1	0.00713399	S	1	1		S	0.0105993	1	1	S	1	1	0.0282282	S	1	1	0.00881031	S	1	2	0.0164655	S	3	5
51560	RAB6B	17	S	1	1	0.00582043	S	1	1	0.00700162	S	1	3	0.0246758	S	1	1	0.00904159		0	0	0	S	1	1	0.00713399	S	1	1		S	0.0105993	1	1	S	1	1	0.0282282	S	1	1	0.00881031	S	1	2	0.0164655	A	2	4
54734	RAB39A	18	S	1	1	0.00582043	S	1	1	0.00700162	S	1	3	0.0246758	S	1	1	0.00904159		0	0	0	S	1	1	0.00713399	S	1	1		S	0.0105993	1	1	S	1	1	0.0282282	S	1	1	0.00881031	S	1	2	0.0164655	A	1	3
56681	SAR1A	12	S	1	1	0.00254459	R	1	1	0.00315885	S	1	1	0.00256112	A	1	1	0.00161206		0	0	0		0	0	0	S	1	1	0.00334137	S	0.00319199	1	1	S	3	3	0.0677052	S	1	1	0.00724502	S	2	2	0.0472676	S	2	2
6612	SUMO3	5.5	S	1	2	0.0334003	S	1	1	0.0175096	S	1	2	0.032306	S	1	2	0.0261122		0	0	0		0	0	0	S	1	2	0.0291123	S	0.0305421	2	1	S	1	1	0.00912417	S	1	2	0.00794058		0	0	0	S	1	1
6613	SUMO2	4.5	S	1	2	0.0334003	S	1	1	0.0175096	S	1	2	0.032306	S	1	2	0.0261122		0	0	0		0	0	0	S	1	2	0.0291123	S	0.0305421	2	1	S	1	1	0.00912417	S	1	2	0.00794058		0	0	0	S	1	1
387082	SUMO4	7	S	1	2	0.0334003	S	1	1	0.0175096	S	1	2	0.032306	S	1	2	0.0261122		0	0	0		0	0	0	S	1	2	0.0291123	S	0.0305421	2	1	S	1	1	0.00912417	S	1	2	0.00794058		0	0	0	S	1	1
51128	SAR1B	12	S	1	1	0.00254459	R	1	1	0.00315885	S	1	1	0.00256112	A	1	1	0.00161206		0	0	0		0	0	0	S	1	1	0.00334137	S	0.00319199	1	1	A	2	2	0	S	1	1	0.00724502	A	1	1	0	A	1	1
9698	PUM1	54	S	1	1	0.00362216	A	1	1	0.000893493	A	1	1	0.00292063	R	2	2	0.00476152		0	0	0		0	0	0		0	0	0	S	0.0232838	4	4	S	1	1	0.00280384		0	0	0	S	8	11	0.188609	S	8	12
23369	PUM2	39	S	1	1	0.00362216	A	1	1	0.000893493	A	1	1	0.00292063	R	2	2	0.00476152		0	0	0		0	0	0		0	0	0	A	0	1	1	S	1	1	0.00382435		0	0	0	S	1	1	0.00890959	R	2	2
1749	DLX5	9	S	2	3	0.0324353	S	3	4	0.0615453	A	2	3	0	S	2	2	0.0102718	S	4	4	0.0551087	S	3	4	0.0711626	S	4	5	0.0742816	S	0.0345067	3	2	S	3	4	0.0653308	S	4	4	0.0901558	S	4	4	0.0746736	S	3	3
283106	CSNK2A3	23	S	3	3	0.0171255	S	3	3	0.0195837	A	4	4	0		0	0	0	S	2	2	0.0125352	S	3	3	0.0214128	R	3	3	0.0245848	S	0.0196146	3	3	A	4	6	0	A	5	6	0	A	5	9	0	A	8	17
6638	SNRPN	17	S	1	1	0.00433664	S	3	3	0.0217919	A	3	3	0	S	2	2	0.00909065	S	3	3	0.0184635	A	3	3	0	S	3	3	0.0172815	A	0	3	3	S	3	3	0.0493647	S	1	1	0.0130814	S	1	1	0.0265474	S	5	8
9063	PIAS2	36.7222	S	1	1	0.00289486	S	1	1	0.00370804	A	1	1	0	S	1	1	0.00435519	A	1	1	0	S	1	1	0.00468937	S	1	1	0.00642911	A	0	1	1	S	2	3	0.019301	S	2	3	0.0169633	S	1	2	0.0139875	S	2	3
5516	PPP2CB	19	S	1	1	0.00268547	S	1	1	0.00223801	A	2	2	0		0	0	0		0	0	0		0	0	0	A	1	1	0.00208967	S	0.00172929	1	1	S	3	4	0.102841	S	2	2	0.0502885	S	5	7	0.123349	S	3	3
375	ARF1	11.5	S	2	2	0.00860972	S	1	1	0.00564591		0	0	0	S	1	1	0.00257188	A	1	1	0.00134825		0	0	0	S	2	2	0.00987444	S	0.00577685	1	1	S	4	4	0.00897767		0	0	0	A	1	1	0	S	8	8
377	ARF3	10	S	2	2	0.00860972	S	1	1	0.00564591		0	0	0	S	1	1	0.00257188	A	1	1	0.00134825		0	0	0	S	2	2	0.00987444	S	0.00577685	1	1	S	4	4	0.00897767		0	0	0	A	1	1	0	S	8	8
10212	DDX39A	19	S	2	2	0.00626559	R	1	1	0.00127153		0	0	0		0	0	0	S	1	1	0.00300967		0	0	0		0	0	0	S	0.00423385	2	2	S	1	2	0.00948372	S	2	2	0.0191191	S	2	2	0.0244352	S	8	9
7919	DDX39B	26	S	2	2	0.00626559	R	1	1	0.00127153		0	0	0		0	0	0	S	1	1	0.00300967		0	0	0		0	0	0	S	0.00423385	2	2	S	1	2	0.00948372	S	2	2	0.0191191	S	2	2	0.0244352	S	9	10
54058	C21orf58	10.7143	S	1	1	0.00965454	S	1	4	0.0392448		0	0	0	S	1	1	0.00743992		0	0	0	S	1	1	0.000468996		0	0	0		0	0	0		0	0	0		0	0	0		0	0	0	S	1	1
344558	SH3RF3	43.6667	S	1	1	0.00965454	S	1	4	0.0392448		0	0	0	S	1	1	0.00743992		0	0	0	S	1	1	0.000468996		0	0	0		0	0	0		0	0	0		0	0	0		0	0	0	S	1	1
653075	GOLGA8T	34.75	A	1	1	0.00174171	S	3	3	0.00875544		0	0	0		0	0	0		0	0	0	S	1	1	0.0015568	S	1	1	0.00180688		0	0	0		0	0	0		0	0	0		0	0	0	R	1	1
653125	GOLGA8K	40	A	1	1	0.00174171	S	3	3	0.00875544		0	0	0		0	0	0		0	0	0	S	1	1	0.0015568	S	1	1	0.00180688		0	0	0		0	0	0		0	0	0		0	0	0	R	1	1
81876	RAB1B	18.5	S	3	3	0.0168034	A	2	2	0	S	5	7	0.0123022	S	3	3	0.0285746	S	6	6	0.0681058	S	1	1	0.001189	S	3	3	0.00602151	A	0	2	2	S	3	3	0.0171614	S	2	2	0.00771079	A	2	3	0	S	3	5
70	ACTC1	23	S	13	32	1.73973	A	10	31	0	S	14	34	2.09735	S	13	28	0.972805	S	14	31	1.61999	S	10	24	1.28847	S	10	25	1.53045	A	0	23	9	S	17	47	3.03126	A	18	55	0	S	21	56	3.91426	S	20	67
640	BLK	33	R	1	1	0.00138056	A	1	1	0	R	1	1	0.00195335	A	1	1	0	A	1	1	0	S	1	1	0.00103695	A	1	1	0	A	0.00151017	2	1	S	1	3	0.0065357	A	1	1	0	S	1	3	0.00863428	S	1	3
2260	FGFR1	40.7273	R	1	1	0.00138056	A	1	1	0	R	1	1	0.00195335	A	1	1	0	A	1	1	0	S	1	1	0.00103695	A	1	1	0	A	0.00151017	2	1	S	1	3	0.0065357	A	1	1	0	S	1	3	0.00863428	S	1	3
2263	FGFR2	38.2083	R	1	1	0.00138056	A	1	1	0	R	1	1	0.00195335	A	1	1	0	A	1	1	0	S	1	1	0.00103695	A	1	1	0	A	0.00151017	2	1	S	1	3	0.0065357	A	1	1	0	S	1	3	0.00863428	S	1	3
2264	FGFR4	40.3333	R	1	1	0.00138056	A	1	1	0	R	1	1	0.00195335	A	1	1	0	A	1	1	0	S	1	1	0.00103695	A	1	1	0	A	0.00151017	2	1	S	1	3	0.0065357	A	1	1	0	S	1	3	0.00863428	S	1	3
2268	FGR	27.2	R	1	1	0.00138056	A	1	1	0	R	1	1	0.00195335	A	1	1	0	A	1	1	0	S	1	1	0.00103695	A	1	1	0	A	0.00151017	2	1	S	1	3	0.0065357	A	1	1	0	S	1	3	0.00863428	S	1	3
2534	FYN	28.75	R	1	1	0.00138056	A	1	1	0	R	1	1	0.00195335	A	1	1	0	A	1	1	0	S	1	1	0.00103695	A	1	1	0	A	0.00151017	2	1	S	1	3	0.0065357	A	1	1	0	S	1	3	0.00863428	S	1	3
3055	HCK	32.6	R	1	1	0.00138056	A	1	1	0	R	1	1	0.00195335	A	1	1	0	A	1	1	0	S	1	1	0.00103695	A	1	1	0	A	0.00151017	2	1	S	1	3	0.0065357	A	1	1	0	S	1	3	0.00863428	S	1	3
3932	LCK	29.5	R	1	1	0.00138056	A	1	1	0	R	1	1	0.00195335	A	1	1	0	A	1	1	0	S	1	1	0.00103695	A	1	1	0	A	0.00151017	2	1	S	1	3	0.0065357	A	1	1	0	S	1	3	0.00863428	S	1	3
4067	LYN	36.25	R	1	1	0.00138056	A	1	1	0	R	1	1	0.00195335	A	1	1	0	A	1	1	0	S	1	1	0.00103695	A	1	1	0	A	0.00151017	2	1	S	1	3	0.0065357	A	1	1	0	S	1	3	0.00863428	S	1	3
4117	MAK	39.1111	R	1	1	0.00138056	A	1	1	0	R	1	1	0.00195335	A	1	1	0	A	1	1	0	S	1	1	0.00103695	A	1	1	0	A	0.00151017	2	1	S	1	3	0.0065357	A	1	1	0	S	1	3	0.00863428	S	1	3
7525	YES1	31	R	1	1	0.00138056	A	1	1	0	R	1	1	0.00195335	A	1	1	0	A	1	1	0	S	1	1	0.00103695	A	1	1	0	A	0.00151017	2	1	S	1	3	0.0065357	A	1	1	0	S	1	3	0.00863428	S	1	3
22858	ICK	45.5	R	1	1	0.00138056	A	1	1	0	R	1	1	0.00195335	A	1	1	0	A	1	1	0	S	1	1	0.00103695	A	1	1	0	A	0.00151017	2	1	S	1	3	0.0065357	A	1	1	0	S	1	3	0.00863428	S	1	3
23552	CDK20	20.7778	R	1	1	0.00138056	A	1	1	0	R	1	1	0.00195335	A	1	1	0	A	1	1	0	S	1	1	0.00103695	A	1	1	0	A	0.00151017	2	1	S	1	3	0.0065357	A	1	1	0	S	1	3	0.00863428	S	1	3
5861	RAB1A	14.6667	S	3	3	0.0168034	A	2	2	0	A	4	6	0	S	3	3	0.0285746	S	6	6	0.0288238	S	1	1	0.001189	S	3	3	0.00602151	A	0	2	2	A	2	2	0	S	2	2	0.00771079	A	2	3	0	A	2	4
90665	TBL1Y	30.75	S	4	4	0.0217434	A	4	5	0	A	6	10	0	A	4	6	0	S	6	7	0.0180041	A	4	5	0	A	5	7	0	A	0	6	5	A	6	9	0	S	6	8	0.0768548	S	8	15	0.164739	A	6	10
3881	KRT31	30	S	4	6	0.560342	A	1	1	0	A	2	4	0	S	2	2	0.147963	A	1	4	0	A	1	1	0	S	2	4	0.442649	S	0.148496	3	2	A	1	3	0	A	1	3	0	A	1	3	0	A	1	2
3884	KRT33B	30	S	4	6	0.560342	A	1	1	0	A	2	4	0	S	2	2	0.147963	A	1	4	0	A	1	1	0	S	2	4	0.442649	S	0.148496	3	2	A	1	3	0	A	1	3	0	A	1	3	0	A	1	2
445582	POTEE	60.3333	S	6	16	0.997166	A	5	19	0	A	5	16	0	A	5	15	0	A	5	16	0	A	5	14	0	A	5	15	0	A	0	13	4	A	5	22	0	A	5	21	0	A	5	21	0	A	5	24
728378	POTEF	55	S	6	16	0.997166	A	5	19	0	A	5	16	0	A	5	15	0	A	5	16	0	A	5	14	0	A	5	15	0	A	0	13	4	A	5	22	0	A	5	21	0	A	5	21	0	A	5	24
54882	ANKHD1	51	S	3	3	0.00801741	A	1	1	0	A	2	2	0	S	1	1	0.0020996		0	0	0	S	3	3	0.00129595	A	2	2	0	S	0.00759129	3	3	S	3	3	0.0100667	S	1	1	0.00500603	S	7	7	0.0505372	S	9	9
404734	ANKHD1-EIF4EBP3	122	S	3	3	0.00801741	A	1	1	0	A	2	2	0	S	1	1	0.0020996		0	0	0	S	3	3	0.00129595	A	2	2	0	S	0.00759129	3	3	S	3	3	0.0100667	S	1	1	0.00500603	S	7	7	0.0505372	S	9	9
653720	GOLGA8M	35.625	A	1	1	0.00174171	A	2	2	0		0	0	0		0	0	0		0	0	0	S	1	1	0.0015568	S	1	1	0.00180688		0	0	0		0	0	0		0	0	0		0	0	0	R	1	1
728498	GOLGA8H	39	A	1	1	0.00174171	A	2	2	0		0	0	0		0	0	0		0	0	0	S	1	1	0.0015568	S	1	1	0.00180688		0	0	0		0	0	0		0	0	0		0	0	0	R	1	1
5937	RBMS1	19.4545	S	1	1	0.0473285		0	0	0	S	2	2	0.145601	S	4	4	0.0634815	S	1	1	0.0468584	R	1	1	0.0160885	R	1	2	0.0431266	R	0.0992552	2	2	S	2	2	0.0793177	S	2	2	0.0744049	S	1	2	0.0400524	S	1	1
5885	RAD21	30	A	1	1	0.00081649		0	0	0	S	2	2	0.00612697	S	2	2	0.00687683		0	0	0		0	0	0	S	1	1	0.000950476	S	0.00879988	2	2	S	5	7	0.0796343	S	5	6	0.0366863	S	11	13	0.17089	S	13	21
3622	ING2	11.3333	S	1	1	0.00280558		0	0	0	S	1	1	0.00516078		0	0	0		0	0	0		0	0	0	S	1	1	0.00286312	S	0.00257347	1	1		0	0	0		0	0	0		0	0	0		0	0
57496	MRTFB	41	R	1	1	0.000490371		0	0	0	A	1	1	0.00542043		0	0	0		0	0	0		0	0	0		0	0	0	R	0.0151089	2	2	S	1	1	0.00160054		0	0	0	S	10	11	0.334587	S	5	5
81	ACTN4	61.8	A	1	1	0.000578601		0	0	0	S	1	1	0.000487154		0	0	0	S	1	1	0.00240927		0	0	0	S	1	1	0.000496999	S	0.00106536	1	1	S	5	7	0.0651542	S	1	1	0.00343184	S	1	1	0.00195452	S	2	2
87	ACTN1	61.3333	A	1	1	0.000578601		0	0	0	S	1	1	0.000487154		0	0	0	S	1	1	0.00240927		0	0	0	S	1	1	0.000496999	S	0.00106536	1	1	A	2	4	0	S	1	1	0.00343184	S	1	1	0.00195452	S	2	2
1478	CSTF2	27.3333	R	1	1	0.00229328		0	0	0	A	1	1	0.00271634		0	0	0		0	0	0	S	2	2	0.00809894	S	1	1	0.00130281	S	0.00293961	1	1	S	2	2	0.00388908	S	1	1	0.0031758	S	1	1	0.00842455	S	5	7
3887	KRT81	33	S	3	3	0.0463403		0	0	0	S	4	5	0.0212156	A	1	2	0		0	0	0	A	1	2	0	A	1	2	0	A	0	1	1		0	0	0		0	0	0	A	1	1	0		0	0
3889	KRT83	35	S	3	3	0.0463403		0	0	0	S	4	5	0.0212156	A	1	2	0		0	0	0	A	1	2	0	A	1	2	0	A	0	1	1		0	0	0		0	0	0	A	1	1	0		0	0
3892	KRT86	38	S	3	3	0.0463403		0	0	0	S	4	5	0.0212156	A	1	2	0		0	0	0	A	1	2	0	A	1	2	0	A	0	1	1		0	0	0		0	0	0	A	1	1	0		0	0
23283	CSTF2T	32	R	1	1	0.00229328		0	0	0	A	1	1	0.00271634		0	0	0		0	0	0	A	1	1	0	S	1	1	0.00130281	S	0.00293961	1	1	S	2	2	0.00388908	S	1	1	0.0031758	S	1	1	0.00842455	A	2	2
54856	GON4L	105.833	R	1	1	0.0048423		0	0	0	S	2	2	0.00626379	S	3	3	0.0121907		0	0	0		0	0	0	S	1	1	0.00241677	S	0.00541039	2	2		0	0	0		0	0	0	S	1	1	0.00805339	S	2	2
55249	YY1AP1	37.125	R	1	1	0.0048423		0	0	0	S	2	2	0.00626379	A	2	2	0		0	0	0		0	0	0	S	1	1	0.00241677	S	0.00541039	2	2		0	0	0		0	0	0	S	1	1	0.00805339	A	1	1
276	AMY1A	31	S	5	6	0.00882		0	0	0	S	2	2	0.00169259		0	0	0		0	0	0		0	0	0	S	1	2	0.000414521		0	0	0		0	0	0		0	0	0		0	0	0		0	0
277	AMY1B	31	S	5	6	0.00882		0	0	0	S	2	2	0.00169259		0	0	0		0	0	0		0	0	0	S	1	2	0.000414521		0	0	0		0	0	0		0	0	0		0	0	0		0	0
278	AMY1C	31	S	5	6	0.00882		0	0	0	S	2	2	0.00169259		0	0	0		0	0	0		0	0	0	S	1	2	0.000414521		0	0	0		0	0	0		0	0	0		0	0	0		0	0
279	AMY2A	30	S	5	6	0.00882		0	0	0	S	2	2	0.00169259		0	0	0		0	0	0		0	0	0	S	1	2	0.000414521		0	0	0		0	0	0		0	0	0		0	0	0		0	0
280	AMY2B	30	S	5	6	0.00882		0	0	0	S	2	2	0.00169259		0	0	0		0	0	0		0	0	0	S	1	2	0.000414521		0	0	0		0	0	0		0	0	0		0	0	0		0	0
51130	ASB3	21.5	R	1	1	0.00111701		0	0	0	R	1	1	0.000621751		0	0	0		0	0	0		0	0	0		0	0	0		0	0	0		0	0	0	S	1	1	0.00190474	S	1	1	0.002461		0	0
100302652	GPR75-ASB3	26	R	1	1	0.00111701		0	0	0	R	1	1	0.000621751		0	0	0		0	0	0		0	0	0		0	0	0		0	0	0		0	0	0	S	1	1	0.00190474	S	1	1	0.002461		0	0
3963	LGALS7	11	S	1	1	0.00118494		0	0	0	S	5	6	0.0844613		0	0	0		0	0	0		0	0	0		0	0	0		0	0	0		0	0	0		0	0	0		0	0	0		0	0
653499	LGALS7B	11	S	1	1	0.00118494		0	0	0	S	5	6	0.0844613		0	0	0		0	0	0		0	0	0		0	0	0		0	0	0		0	0	0		0	0	0		0	0	0		0	0
200316	APOBEC3F	14.25	R	1	1	0.00180456		0	0	0	A	1	1	0	A	1	1	0.00203152	S	1	1	0.00466235	A	1	1	0	A	1	1	0	A	0	1	1		0	0	0		0	0	0		0	0	0		0	0
27303	RBMS3	14.4375	S	1	1	0.0473285		0	0	0	A	1	1	0	A	1	1	0	S	1	1	0.0468584		0	0	0		0	0	0	A	0	1	1	A	1	1	0	A	1	1	0	S	1	2	0.0400524	S	1	1
642636	RAD21L1	21.8333	A	1	1	0.00081649		0	0	0	A	1	1	0	A	1	1	0		0	0	0		0	0	0	S	1	1	0.000950476	A	0	1	1	A	3	5	0	A	3	4	0	A	3	4	0	A	3	6
148206	ZNF714	41	R	1	2	0.00545913		0	0	0		0	0	0		0	0	0	R	1	2	0.00659672		0	0	0		0	0	0		0	0	0		0	0	0		0	0	0	S	1	1	0.000361067	S	1	1
2783	GNB2	16	A	1	1	0.00222308		0	0	0		0	0	0		0	0	0	S	1	1	0.000827413		0	0	0		0	0	0		0	0	0		0	0	0		0	0	0		0	0	0	S	1	1
59345	GNB4	17	A	1	1	0.00222308		0	0	0		0	0	0		0	0	0	S	1	1	0.000827413		0	0	0		0	0	0		0	0	0		0	0	0		0	0	0		0	0	0	S	1	1
88745	RRP36	9	S	1	1	0.00280558		0	0	0		0	0	0		0	0	0		0	0	0		0	0	0	S	1	1	0.00286312	S	0.00257347	1	1		0	0	0		0	0	0		0	0	0		0	0
57591	MRTFA	42.25	R	1	1	0.000490371		0	0	0		0	0	0		0	0	0		0	0	0		0	0	0		0	0	0	A	0	1	1	S	1	1	0.00160054		0	0	0	S	5	6	0.0468076	S	3	3
93649	MYOCD	45.6	R	1	1	0.000490371		0	0	0		0	0	0		0	0	0		0	0	0		0	0	0		0	0	0	A	0	1	1	S	1	1	0.00160054		0	0	0	A	1	2	0	A	1	1
8301	PICALM	31.2941	R	1	1	0.00213163		0	0	0		0	0	0		0	0	0		0	0	0		0	0	0		0	0	0		0	0	0	S	1	1	0.00130349		0	0	0	S	4	5	0.0430999	S	5	7
91283	MSANTD3	14.5	R	1	1	0.00275508		0	0	0		0	0	0		0	0	0		0	0	0		0	0	0		0	0	0		0	0	0	S	1	1	0.00852945		0	0	0	S	1	1	0.00618495		0	0
100526694	MSANTD3-TMEFF1	27	R	1	1	0.00275508		0	0	0		0	0	0		0	0	0		0	0	0		0	0	0		0	0	0		0	0	0	S	1	1	0.00852945		0	0	0	S	1	1	0.00618495		0	0
83637	ZMIZ2	34.5	A	1	1	0.000621504		0	0	0		0	0	0		0	0	0		0	0	0		0	0	0		0	0	0		0	0	0		0	0	0		0	0	0	S	2	2	0.0146042	S	2	3
9991	PTBP3	22.7778	A	2	2	0	R	2	2	0.00784356	S	2	2	0.00669628	S	2	2	0.00820587	S	3	3	0.016845	A	1	1	0		0	0	0	S	0.0345603	4	4	S	7	9	0.0784365	S	4	5	0.0243126	S	11	20	0.542713	S	14	39
23316	CUX2	89	A	7	29	0	S	9	46	0.00737609	S	8	29	0.00354103	A	8	25	0	S	8	42	0.00739353	A	8	27	0	A	7	31	0	S	0.00472235	29	9	A	9	35	0	A	10	32	0	A	8	32	0	A	9	26
26038	CHD5	117	A	23	55	0	S	22	42	0.0108467	S	28	52	0.128804	S	26	52	0.257891	A	15	38	0	S	28	51	0.0140966	S	23	51	0.0220984	S	0.0459721	49	24	S	25	78	0.0926541	A	21	75	0	A	28	79	0	S	25	89
7942	TFEB	21.6667	A	1	1	0	S	2	3	0.0113058	R	2	2	0.0133084	S	2	2	0.00976332	A	1	1	0	S	3	3	0.0151535	S	4	4	0.014623	S	0.0182161	3	3	A	2	2	0	A	2	2	0	A	1	1	0	A	2	2
51350	KRT76	42	A	10	20	0	S	7	12	0.0339964	S	12	27	0.00921079	A	7	13	0	A	4	6	0	A	8	16	0	A	8	14	0	A	0	14	8	A	8	16	0	A	6	13	0	A	8	16	0	A	7	13
26057	ANKRD17	80.5	A	1	1	0	S	2	2	0.00912876	S	3	3	0.0138514	S	1	1	0.005711		0	0	0	S	2	2	0.00288389	S	3	3	0.0135239	S	0.013996	2	2		0	0	0	S	1	1	0.00770334	S	4	4	0.0458922	S	4	4
5990	RFX2	39.75	A	2	3	0	S	3	3	0.0110818	A	2	3	0	A	2	4	0	A	1	1	0	A	2	3	0	A	2	3	0	A	0	5	4	A	1	2	0	A	1	1	0	A	3	3	0	A	3	4
3866	KRT15	35	A	10	21	0	S	9	15	0.973025	S	11	29	0.0991195	A	8	14	0	S	6	11	0.609788	A	9	12	0	A	9	14	0	A	0	14	8	S	9	15	1.51443	S	7	15	0.913546	S	7	12	1.09753	S	9	15
56956	LHX9	19.4	A	1	1	0	S	2	2	0.0184051	S	3	3	0.0143805	S	1	1	0.00912548	S	2	3	0.016193	S	2	2	0.0203128	A	1	1	0	S	0.015142	2	2		0	0	0		0	0	0		0	0	0		0	0
7846	TUBA1A	25.5	A	19	75	0	S	18	70	13.0682	S	21	83	17.7743	A	21	56	0	S	22	86	15.7421	S	21	79	14.8573	S	24	79	15.345	A	0	79	22	S	26	101	32.3106	S	26	101	26.507	S	28	130	54.839	S	31	158
830	CAPZA2	16	A	1	1	0	S	1	1	0.00522348	S	1	1	0.0100568	S	1	1	0.00549695	A	1	1	0	S	1	1	0.00441107	S	1	1	0.00616808	A	0	1	1	S	2	2	0.0265147	A	1	1	0	S	3	3	0.051775	S	2	2
8340	HIST1H2BL	11	A	7	28	0	S	4	26	0.327568	S	6	32	0.337734	S	8	25	0.182084	A	9	38	0	A	7	37	0	A	7	32	0	S	0.32393	29	6	A	10	52	0	A	13	59	0	A	10	48	0	A	4	37
286887	KRT6C	38	A	25	50	0	S	11	24	0.346756	A	40	108	0	A	13	25	0	S	15	29	0.357408	A	16	30	0	S	19	34	1.54593	S	1.11067	34	20	A	19	32	0	S	15	30	1.17514	S	15	30	1.45289	A	16	33
3015	H2AFZ	6	A	2	5	0	S	3	10	1.10418	A	2	6	0	A	2	4	0	S	3	5	1.22804	A	2	6	0	A	2	6	0	S	1.12346	6	3	S	3	9	3.08315	A	2	7	0	A	2	6	0	S	3	8
94239	H2AFV	5	A	2	5	0	S	3	10	1.10418	A	2	6	0	A	2	4	0	S	3	5	1.22804	A	2	6	0	A	2	6	0	S	1.12346	6	3	S	3	9	3.08315	A	2	7	0	A	2	6	0	S	3	8
84163	GTF2IRD2	30.5	A	1	1	0	S	2	3	0.0180818	A	1	1	0	S	1	1	0.013372	A	1	2	0	S	2	2	0.0143939	A	1	1	0	A	0	2	1		0	0	0		0	0	0	A	2	3	0	S	4	10
389524	GTF2IRD2B	55	A	1	1	0	S	2	3	0.0180818	A	1	1	0	S	1	1	0.013372	A	1	2	0	S	2	2	0.0143939	A	1	1	0	A	0	2	1		0	0	0		0	0	0	A	2	3	0	S	4	10
7280	TUBB2A	22.5	A	17	75	0	S	15	76	5.50268	A	17	75	0	A	14	64	0	A	15	78	0	A	16	79	0	A	17	76	0	A	0	84	17	S	19	118	0.060895	A	18	104	0	S	25	167	0.109871	S	28	182
347733	TUBB2B	25	A	17	75	0	S	15	76	5.50268	A	17	75	0	A	14	64	0	A	15	78	0	A	16	79	0	A	17	76	0	A	0	84	17	A	18	117	0	A	18	104	0	A	24	166	0	A	26	180
128312	HIST3H2BB	11	A	4	25	0	S	4	25	0.871864	A	4	29	0	A	6	23	0	A	4	31	0	A	5	32	0	A	4	29	0	A	0	26	5	A	8	48	0	A	9	46	0	A	8	41	0	A	4	35
9085	CDY1	32.6667	A	1	1	0	S	2	2	0.0118221	A	1	1	0	A	1	1	0	A	1	1	0	A	1	1	0	A	1	1	0	A	0	1	1	A	1	2	0	A	1	3	0	A	1	2	0	A	1	1
9426	CDY2A	33	A	1	1	0	S	2	2	0.0118221	A	1	1	0	A	1	1	0	A	1	1	0	A	1	1	0	A	1	1	0	A	0	1	1	A	1	2	0	A	1	3	0	A	1	2	0	A	1	1
203611	CDY2B	33	A	1	1	0	S	2	2	0.0118221	A	1	1	0	A	1	1	0	A	1	1	0	A	1	1	0	A	1	1	0	A	0	1	1	A	1	2	0	A	1	3	0	A	1	2	0	A	1	1
253175	CDY1B	32.6667	A	1	1	0	S	2	2	0.0118221	A	1	1	0	A	1	1	0	A	1	1	0	A	1	1	0	A	1	1	0	A	0	1	1	A	1	2	0	A	1	3	0	A	1	2	0	A	1	1
3326	HSP90AB1	40	A	2	2	0	S	2	2	0.0119691	A	2	2	0	S	3	3	0.00607572		0	0	0	S	2	2	0.00510946	S	3	3	0.0115902	A	0	4	3	S	10	15	0.845073	S	4	6	0.0547699	S	6	9	0.19684	S	21	41
378	ARF4	12	A	1	1	0	S	1	1	0.00564591		0	0	0	S	1	1	0.00257188	A	1	1	0.00134825		0	0	0	A	1	1	0	S	0.00577685	1	1	S	3	3	0.0303584	S	1	1	0.00563898	S	4	4	0.0429049	S	7	7
381	ARF5	12	A	1	1	0	S	1	1	0.00564591		0	0	0	S	1	1	0.00257188	A	1	1	0.00134825		0	0	0	A	1	1	0	S	0.00577685	1	1	A	1	1	0		0	0	0	S	2	2	0.00224204	S	5	5
10150	MBNL2	15.7	A	1	1	0	A	1	2	0.0879621		0	0	0	A	1	1	0	A	1	1	0		0	0	0		0	0	0	A	0	1	1		0	0	0		0	0	0	S	2	2	0.023218	S	2	2
10890	RAB10	13.5	A	2	2	0	A	2	2	0	S	4	6	0.0287915	A	2	2	0	S	3	3	0.030549	S	1	1	0.001189	A	2	2	0	S	0.0122739	3	3	S	3	4	0.0252931	S	2	2	0.0305283	S	4	5	0.025272	S	3	5
10847	SRCAP	135	A	1	1	0	A	1	1	0	S	2	2	0.00636573	S	2	2	0.00310572	A	1	1	0.0222049	A	1	1	0	A	1	1	0	S	0.00519521	2	2		0	0	0		0	0	0	S	3	3	0.0236146	S	7	7
83746	L3MBTL2	30.2857	A	1	1	0	A	2	2	0	S	1	1	0.00682095	S	4	4	0.0124211	A	1	1	0	A	1	1	0	S	4	4	0.0199061	S	0.00977993	3	3	S	4	5	0.022504	S	2	2	0.00806507	S	3	4	0.0105026	A	2	2
29841	GRHL1	30.2857	A	2	3	0	A	2	5	0	S	4	7	0.00713959	A	1	1	0	A	4	6	0	A	2	4	0	S	3	6	0.00737773	S	0.00741315	7	3	S	3	8	0.00944653	A	4	9	0	S	4	8	0.0201666	S	3	7
79861	TUBAL3	28	A	3	5	0	A	2	3	0	S	5	11	0.191697	A	4	7	0	A	4	8	0	A	4	5	0	A	4	6	0	S	0.168246	5	5	A	3	15	0	A	3	14	0	A	3	16	0	A	3	23
8688	KRT37	28	A	1	3	0	A	1	1	0	S	2	4	0.0241948	A	1	1	0	A	1	4	0	A	1	1	0	A	1	3	0	A	0	2	1	A	1	3	0	S	2	4	0.0157154	A	1	3	0	A	1	2
7090	TLE3	42.1364	A	3	4	0	A	2	4	0	S	3	4	0.0286112	S	2	3	0.0127246		0	0	0	S	3	4	0.00166641	S	3	4	0.0113876	S	0.0161742	5	4	S	7	7	0.108034	S	4	6	0.0786274	S	4	6	0.153193	S	6	9
29979	UBQLN1	17.6667	A	1	1	0	A	1	1	0	R	1	1	0.0548559	S	1	1	0.00805056	S	1	1	0.00549484	R	1	1	0.00986867	A	1	1	0	A	0	1	1	S	1	1	0.00688666	A	1	1	0	A	1	1	0	A	2	2
1974	EIF4A2	25	A	2	3	0	A	1	1	0	S	2	2	0.0146381	S	2	2	0.0129626	A	2	2	0	A	2	2	0	A	1	1	0	A	0	2	1	A	5	8	0	A	4	5	0	S	9	18	0.0159441	S	15	46
3882	KRT32	32	A	2	4	0	A	1	1	0	S	3	6	0.865877	A	1	1	0	A	1	4	0	A	1	1	0	S	2	4	0.0027466	A	0	2	1	A	1	3	0	A	1	3	0	A	1	3	0	A	1	2
7068	THRB	25.5	A	1	1	0	A	1	1	0	S	1	1	0.0177105	A	1	1	0	A	1	1	0	A	1	1	0	A	1	1	0	S	0.0139395	1	1		0	0	0	S	1	1	0.0172014	S	2	2	0.0350801		0	0
6430	SRSF5	8.25	A	1	1	0	A	1	1	0	S	1	1	0.00380971	A	1	1	0	A	1	1	0	A	1	1	0	A	1	1	0	A	0	1	1	S	2	2	0.0389776	S	1	1	0.00554013	S	3	3	0.0531061	S	3	3
8689	KRT36	33	A	2	4	0	A	1	1	0	S	3	6	0.865877	A	1	1	0	A	1	4	0	A	1	1	0	A	1	3	0	A	0	2	1	A	1	3	0	A	1	3	0	A	1	3	0	A	1	2
5501	PPP1CC	20.5	A	3	3	0	A	1	1	0	A	1	1	0	A	1	1	0	S	3	3	0.0058647	R	1	1		A	2	2	0	S	0.0354932	3	3	S	4	7	0.0192173	S	3	3	0.00853753	S	5	8	0.0319374	S	6	10
116447	TOP1MT	37	A	6	43	0	A	7	35	0	A	6	43	0	S	8	39	0.0563015	S	7	57	0.016756	A	6	43	0	A	6	49	0	S	0.00117171	42	7	S	9	61	0.1064	S	9	70	0.0446139	S	9	63	0.0646368	S	9	66
4774	NFIA	23.5556	A	5	8	0	A	5	11	0	A	4	9	0	S	4	6	0.00821796	S	6	16	0.713105	A	5	14	0	A	5	14	0	A	0	9	4	S	12	25	0.522759	S	10	21	0.377231	S	9	23	0.408327	S	11	21
10971	YWHAQ	18	A	3	3	0	A	2	3	0	A	3	4	0	A	2	3	0	S	5	5	0.0255	A	3	4	0	A	3	4	0	A	0	4	3	S	4	8	0.00780108	A	3	3	0	A	3	6	0	A	4	7
138474	TAF1L	95	A	14	18	0	A	11	13	0	A	12	14	0	A	10	13	0	S	3	5	0.0209794	A	10	11	0	A	14	18	0	A	0	16	13	S	9	10	0.067408	A	10	11	0	A	12	14	0	A	9	11
7975	MAFK	11	A	1	1	0	A	2	3	0	A	2	3	0	A	1	1	0	S	2	2	0.0120673	A	2	3	0	A	2	2	0	A	0	3	2	S	2	2	0.00123999	A	1	1	0	A	1	1	0	A	1	1
10381	TUBB3	23	A	12	58	0	A	12	64	0	A	13	64	0	A	11	53	0	S	13	70	8.94513	A	12	68	0	A	11	58	0	A	0	66	12	A	14	86	0	A	15	83	0	S	17	117	0.0252405	S	18	130
9119	KRT75	37	A	9	18	0	A	5	17	0	A	15	33	0	A	6	11	0	S	6	15	0.580693	A	8	17	0	A	7	16	0	A	0	14	8	A	7	14	0	A	5	14	0	A	6	15	0	A	6	17
7544	ZFY	33.4	A	2	5	0	A	1	3	0	A	2	3	0	A	2	5	0	S	1	3	0.0240522	A	1	3	0	A	1	2	0	A	0	2	1	A	2	3	0	A	2	4	0		0	0	0	A	2	3
8715	NOL4	28.5714	A	2	3	0	A	2	3	0	A	1	2	0	A	1	2	0	S	1	1	0.00643287	A	2	3	0	A	2	3	0	A	0	2	1		0	0	0		0	0	0	S	2	3	0.0225519		0	0
117154	DACH2	26.75	A	2	4	0	A	1	1	0	A	2	3	0	A	2	5	0	S	2	2	0.00452865	A	2	5	0	A	2	3	0	A	0	4	2		0	0	0		0	0	0		0	0	0		0	0
203522	INTS6L	42.5385	A	1	2	0	A	2	3	0	A	1	1	0		0	0	0	R	1	1	8.33254e-05	A	1	1	0	A	1	1	0	A	0	1	1	S	6	7	0.00849467	A	2	3	0	S	6	7	0.00854399	A	5	6
161	AP2A2	56	A	3	3	0	A	1	1	0	A	1	1	0	A	1	1	0	A	1	1	0.00112802		0	0	0	A	2	2	0	A	0	2	2	A	3	5	0	A	1	2	0	S	6	9	0.0242011	S	10	14
10062	NR1H3	20.2667	A	1	1	0	A	1	1	0	A	1	1	0		0	0	0	S	2	2	0.00444948		0	0	0	A	1	1	0	A	0	1	1	A	1	1	0	A	3	5	0	A	2	2	0	A	3	4
7404	UTY	74.5593	A	9	9	0	A	7	9	0	A	8	10	0	A	12	15	0	A	2	6	0	S	8	11	0.0403348	A	7	8	0	S	0.0398072	12	10	A	6	6	0	A	2	2	0	A	8	9	0	A	8	9
4478	MSN	41	A	1	1	0	A	2	2	0	A	3	3	0	S	4	4	0.0136583	A	2	2	0	S	2	2	0.0102389	A	2	2	0	A	0	2	2	S	1	1	0.00196516	S	1	1	0.00104705		0	0	0		0	0
7430	EZR	33	A	1	1	0	A	2	2	0	A	3	3	0	S	4	4	0.0136583	A	2	2	0	S	2	2	0.0102389	A	2	2	0	A	0	2	2	S	1	1	0.00196516	S	1	1	0.00104705		0	0	0		0	0
100526737	RBM14-RBM4	14	A	5	6	0	A	2	2	0	A	4	5	0	A	3	3	0	A	4	5	0	S	3	3	0.0280333	S	4	4	0.0344407	S	0.0419162	6	5	A	3	3	0	A	2	2	0	A	1	1	0	A	3	4
4218	RAB8A	17.5	A	2	2	0	A	2	2	0	A	3	5	0	A	2	2	0	A	2	2	0	S	1	1	0.001189	A	2	2	0	A	0	2	2	A	2	2	0	S	2	2	0.00771079	A	2	3	0	S	3	5
51762	RAB8B	11	A	2	2	0	A	2	2	0	A	3	5	0	A	2	2	0	A	2	2	0	S	1	1	0.001189	A	2	2	0	A	0	2	2	A	2	2	0	S	2	2	0.00771079	A	2	3	0	S	3	5
8531	YBX3	7.6	A	2	5	0	A	1	3	0	A	4	6	0	S	2	4	0.0302042	A	3	6	0	A	3	6	0	A	2	4	0	S	0.0104246	5	3	A	1	1	0	A	2	2	0	A	1	1	0	A	1	1
387332	TBPL2	21	A	2	3	0	A	4	4	0	A	4	5	0	S	1	2	0.01806	A	5	6	0	A	5	5	0	S	4	4	0.0774567	A	0	4	4	A	2	3	0	A	3	5	0	A	2	3	0	A	3	3
140807	KRT72	30.625	A	2	6	0	A	2	6	0	A	3	10	0	A	2	4	0	A	2	3	0	A	2	4	0	S	3	5	0.0799437	A	0	4	2	A	2	4	0	A	2	4	0	A	2	4	0	A	2	4
319101	KRT73	34.5	A	2	6	0	A	2	6	0	A	2	5	0	A	2	4	0	A	2	3	0	A	2	4	0	S	3	5	0.0799437	A	0	5	3	A	3	5	0	A	2	4	0	A	2	4	0	A	2	4
121391	KRT74	37	A	2	6	0	A	2	6	0	A	2	5	0	A	2	4	0	A	2	3	0	A	2	4	0	S	3	5	0.0799437	A	0	5	3	A	3	5	0	A	2	4	0	A	2	4	0	A	2	4
112802	KRT71	34	A	2	6	0	A	2	6	0	A	2	5	0	A	2	4	0	A	2	3	0	A	2	4	0	S	3	5	0.0799437	A	0	5	3	A	2	4	0	A	2	4	0	A	2	4	0	A	2	4
51755	CDK12	75.5	A	1	1	0	A	1	1	0	A	1	1	0	A	1	1	0	A	1	1	0	A	1	1	0	A	1	1	0	A	0.00514952	3	2	A	1	3	0	A	1	1	0	S	2	4	0.0161258	S	4	6
1870	E2F2	17.6	A	4	5	0	A	5	6	0	A	4	5	0	A	4	6	0	A	5	6	0	A	4	6	0	A	5	6	0	A	0	6	5	S	7	9	0.0207449	S	6	8	0.0116202	S	6	8	0.0107602	S	7	8
6875	TAF4B	39.7143	A	1	1	0	A	1	1	0	A	1	1	0	A	1	1	0	A	1	1	0	A	1	1	0	A	1	2	0	A	0	1	1	S	4	5	0.0375837	S	3	3	0.0146892	S	3	3	0.0217526	S	3	4
26286	ARFGAP3	32	A	1	1	0	A	1	1	0	A	1	1	0	A	1	1	0	A	1	2	0	A	1	1	0	A	1	1	0	A	0	1	1	S	4	5	0.0388391	S	2	2	0.0113003	S	8	10	0.174424	S	7	9
1917	EEF1A2	27	A	6	9	0	A	5	7	0	A	6	9	0	A	5	8	0	A	6	6	0	A	6	8	0	A	5	7	0	A	0	9	6	S	10	29	0.140678	S	12	23	0.155382	S	9	24	0.0395329	S	12	39
983	CDK1	15.3333	A	1	1	0	A	1	1	0	A	1	1	0	A	1	1	0	A	1	1	0	A	1	1	0	A	1	1	0	A	0	2	1	S	4	6	0.023203	S	2	2	0.0232504	S	2	4	0.00449513	S	4	6
7533	YWHAH	18	A	3	3	0	A	2	3	0	A	3	4	0	A	2	3	0	A	3	3	0	A	3	4	0	A	3	4	0	A	0	4	3	S	4	8	0.0450924	A	3	3	0	A	3	6	0	S	5	9
8687	KRT38	29	A	2	4	0	A	1	1	0	A	2	4	0	A	1	1	0	A	1	4	0	A	1	1	0	A	1	3	0	A	0	2	1	S	2	4	0.017169	A	1	3	0	A	1	3	0	A	1	2
5129	CDK18	35.5	A	1	1	0	A	1	1	0	A	1	1	0	A	1	1	0	A	1	1	0	A	1	1	0	A	1	1	0	A	0	2	1	S	2	4	0.0206317	A	1	1	0	A	1	3	0	A	1	3
4286	MITF	21.75	A	2	2	0	A	2	3	0	A	2	2	0	A	2	2	0	A	2	2	0	A	2	2	0	A	3	3	0	A	0	3	3	S	3	3	0.0317547	S	4	4	0.0519787	A	2	2	0	S	3	3
338785	KRT79	36	A	9	22	0	A	6	13	0	A	11	31	0	A	6	12	0	A	5	14	0	A	8	17	0	A	8	17	0	A	0	15	8	A	7	17	0	S	7	19	0.0214007	S	10	23	0.117647	S	8	23
1017	CDK2	20.75	A	1	1	0	A	1	1	0	A	1	1	0	A	1	1	0	A	1	1	0	A	1	1	0	A	1	1	0	A	0	2	1	A	2	4	0	S	2	2	0.0232504	S	2	4	0.0146471	S	4	6
3014	H2AFX	9	A	2	5	0	A	3	10	0	A	3	7	0	A	2	4	0	A	2	4	0	A	3	7	0	A	2	6	0	A	0	5	2	A	3	10	0	S	3	8	2.51103	A	2	6	0	S	4	9
221613	HIST1H2AA	7	A	2	5	0	A	3	10	0	A	3	7	0	A	2	4	0	A	2	4	0	A	3	7	0	A	2	6	0	A	0	5	2	A	3	10	0	S	3	8	2.51103	A	2	6	0	S	4	9
1018	CDK3	22	A	1	1	0	A	1	1	0	A	1	1	0	A	1	1	0	A	1	1	0	A	1	1	0	A	1	1	0	A	0	2	1	A	2	4	0	S	2	2	0.0232504	A	1	3	0	A	2	4
83759	RBM4B	18.5	A	4	4	0	A	2	2	0	A	3	3	0	A	3	3	0	A	3	3	0	A	1	1	0	A	1	1	0	A	0	2	2	A	2	2	0	A	2	2	0	S	3	3	0.0352851	A	1	1
1024	CDK8	12.6	A	2	2	0	A	2	2	0	A	3	4	0	A	3	3	0	A	1	1	0	A	3	3	0	A	3	3	0	A	0	3	3	A	3	4	0	A	3	4	0	S	4	7	0.0656805	S	3	5
8621	CDK13	78.6	A	1	1	0	A	1	1	0	A	1	1	0	A	1	1	0	A	1	1	0	A	1	1	0	A	1	1	0	A	0	2	1	A	1	3	0	A	1	1	0	A	1	3	0	S	3	5
1019	CDK4	20	A	1	1	0	A	1	1	0	A	1	1	0	A	1	1	0	A	1	1	0	A	1	1	0	A	1	1	0	A	0	2	1	A	1	3	0	A	1	1	0	A	1	3	0	S	2	4
162605	KRT28	29	A	3	15	0	A	2	5	0	A	3	19	0	A	3	10	0	A	3	10	0	A	3	10	0	A	3	11	0	A	0	13	3	A	3	13	0	A	3	10	0	A	3	9	0	A	3	9
6926	TBX3	40	A	3	6	0	A	2	3	0	A	2	4	0	A	4	5	0	A	1	1	0	A	3	6	0	A	5	6	0	A	0	4	2	A	2	4	0	A	2	5	0	A	2	4	0	A	2	2
5864	RAB3A	16	A	1	1	0	A	1	1	0	A	1	3	0	A	1	1	0		0	0	0	S	1	1	0.001189	A	1	1	0	A	0	1	1	A	1	1	0	A	1	1	0	A	1	2	0	A	2	4
5865	RAB3B	16	A	1	1	0	A	1	1	0	A	1	3	0	A	1	1	0		0	0	0	S	1	1	0.001189	A	1	1	0	A	0	1	1	A	1	1	0	A	1	1	0	A	1	2	0	A	2	4
9545	RAB3D	16	A	1	1	0	A	1	1	0	A	1	3	0	A	1	1	0		0	0	0	S	1	1	0.001189	A	1	1	0	A	0	1	1	A	1	1	0	A	1	1	0	A	1	2	0	A	2	4
115827	RAB3C	16.5	A	1	1	0	A	1	1	0	A	1	3	0	A	1	1	0		0	0	0	S	1	1	0.001189	A	1	1	0	A	0	1	1	A	1	1	0	A	1	1	0	A	1	2	0	A	2	4
5867	RAB4A	11.5	A	1	1	0	A	1	1	0	A	1	3	0	A	1	1	0		0	0	0	S	1	1	0.001189	A	1	1	0	A	0	1	1	A	1	1	0	A	1	1	0	A	1	2	0	A	1	3
27314	RAB30	18	A	1	1	0	A	1	1	0	A	1	3	0	A	1	1	0		0	0	0	S	1	1	0.001189	A	1	1	0	A	0	1	1	A	1	1	0	A	1	1	0	A	1	2	0	A	1	3
53916	RAB4B	15	A	1	1	0	A	1	1	0	A	1	3	0	A	1	1	0		0	0	0	S	1	1	0.001189	A	1	1	0	A	0	1	1	A	1	1	0	A	1	1	0	A	1	2	0	A	1	3
116442	RAB39B	16	A	1	1	0	A	1	1	0	A	1	3	0	A	1	1	0		0	0	0	S	1	1	0.001189	A	1	1	0	A	0	1	1	A	1	1	0	A	1	1	0	A	1	2	0	A	1	3
201475	RAB12	16	A	1	1	0	A	1	1	0	A	1	3	0	A	1	1	0		0	0	0	S	1	1	0.001189	A	1	1	0	A	0	1	1	A	1	1	0	A	1	1	0	A	1	2	0	A	1	3
326624	RAB37	18.4	A	1	1	0	A	1	1	0	A	1	3	0	A	1	1	0		0	0	0	S	1	1	0.001189	A	1	1	0	A	0	1	1	A	1	1	0	A	1	1	0	A	1	2	0	A	1	3
339122	RAB43	12.3333	A	1	1	0	A	1	1	0	A	1	3	0	A	1	1	0		0	0	0	S	1	1	0.001189	A	1	1	0	A	0	1	1	A	1	1	0	A	1	1	0	A	1	2	0	A	1	3
116931	MED12L	106.5	A	3	5	0	A	2	2	0	A	4	4	0	A	3	3	0		0	0	0	A	3	3	0	A	2	2	0	S	0.0330803	4	4	S	3	4	0.00462075		0	0	0	S	8	9	0.173372	A	2	3
4862	NPAS2	42.1818	A	1	1	0	A	1	1	0	A	1	1	0	A	1	1	0		0	0	0	A	1	1	0	A	1	1	0	S	0.00416515	2	2	A	1	1	0	A	1	1	0	A	1	1	0		0	0
32	ACACB	132.5	A	5	5	0	A	5	6	0	A	5	5	0	A	3	3	0		0	0	0	A	3	3	0	A	3	3	0	A	0	4	4	S	3	3	0.00527294	A	1	1	0	S	4	4	0.0112755	S	3	3
6629	SNRPB2	12	A	1	1	0	A	1	1	0	A	2	2	0	A	1	1	0		0	0	0	A	2	2	0	A	1	1	0	A	0	2	2	S	3	3	0.0124967	A	1	1	0	A	1	1	0	S	3	3
3222	HOXC5	13	A	1	2	0	A	1	1	0	A	1	1	0	A	1	1	0		0	0	0		0	0	0	A	1	1	0		0	0	0	S	2	4	0.00990772	S	2	3	0.00300237	S	2	4	0.00133683		0	0
1912	PHC2	36	A	1	1	0		0	0	0	S	1	1			0	0	0	S	1	1	0.00557797	S	1	1	0.00700854	A	1	1	0.00779753	S	0.00119515	1	1	S	1	1	0.00750873		0	0	0	S	1	1	0.00984508	S	1	1
283248	RCOR2	32.5	A	1	1	0		0	0	0	S	3	5	0.00716957	S	3	5	0.00411517	A	1	2	0	A	1	2	0	A	1	3	0	S	0.0089144	5	4	A	1	2	0	A	1	2	0	A	1	2	0	A	1	1
5630	PRPH	37	A	2	3	0		0	0	0	S	2	2	0.0263515		0	0	0		0	0	0	A	1	2	0	A	1	2	0	A	0	1	1		0	0	0	A	2	2	0	A	1	1	0	A	1	1
25984	KRT23	27.5	A	1	1	0		0	0	0	S	2	4	0.00394369		0	0	0		0	0	0		0	0	0		0	0	0		0	0	0	A	1	1	0		0	0	0		0	0	0	A	1	1
56917	MEIS3	19.0833	A	1	1	0		0	0	0	R	1	1			0	0	0		0	0	0	A	1	1	0	A	2	2	0	A	0	2	2	S	1	1	0.00199534	S	2	2	0.0045654	S	1	1	0.00253872	S	1	1
140465	MYL6B	15	A	1	1	0		0	0	0	A	1	1	0	A	1	1	0	S	1	1	0.0100014		0	0	0	A	1	1	0	A	0	1	1	A	1	1	0		0	0	0	A	1	1	0	A	1	1
3148	HMGB2	11	A	1	1	0		0	0	0	A	1	2	0	A	1	1	0	A	1	2	0		0	0	0	A	1	1	0		0	0	0	S	2	2	0.00398371	S	2	2	0.00209542		0	0	0	A	1	1
1875	E2F5	17	A	1	1	0		0	0	0	A	2	2	0	A	1	1	0		0	0	0	A	2	2	0	A	2	2	0	A	0	2	2	S	3	3	0.00964095	A	1	1	0	A	2	2	0	S	2	2
57787	MARK4	46.3333	A	1	1	0		0	0	0	A	1	1	0	S	2	2	0.000300448		0	0	0		0	0	0	A	1	1	0		0	0	0	A	1	1	0		0	0	0		0	0	0		0	0
4140	MARK3	27.3214	A	1	1	0		0	0	0	A	1	1	0	S	2	2	0.00967978		0	0	0		0	0	0	A	2	2	0	A	0	2	2	A	1	1	0		0	0	0	S	1	1	0.00865924	S	3	3
4139	MARK1	41.25	A	1	1	0		0	0	0	A	1	1	0	S	2	2	0.00967978		0	0	0		0	0	0	A	1	1	0		0	0	0	A	1	1	0		0	0	0		0	0	0	A	2	2
4628	MYH10	130.25	A	1	1	0		0	0	0	A	1	1	0	A	1	1	0		0	0	0		0	0	0		0	0	0		0	0	0		0	0	0	A	1	1	0	A	1	1	0	S	4	4
26958	COPG2	46	A	1	1	0		0	0	0		0	0	0		0	0	0	S	1	2	0.00700698	A	1	1	0.000648382		0	0	0	A	0	3	2	A	2	3	0	S	1	1	0.00335435	S	4	7	0.0367183	S	13	22
3209	HOXA13	15	A	1	1	0		0	0	0		0	0	0	S	1	1	0.00164822	S	1	1	0.00432695	A	1	1	0	A	1	1	0	A	0	1	1		0	0	0		0	0	0	A	1	1	0		0	0
9874	TLK1	42	A	1	1	0		0	0	0		0	0	0	A	1	1	0		0	0	0	A	1	1	0	A	1	1	0	A	0	1	1	S	6	6	0.00483968	S	4	4	0.00282194	S	4	5	0.00605368	S	5	6
51460	SFMBT1	54	A	1	1	0		0	0	0		0	0	0	R	1	1	0.0101829		0	0	0		0	0	0		0	0	0		0	0	0	S	2	2	0.00989345	A	1	1	0	S	2	2	0.0116902	S	2	2
197407	ZNF48	36.5		0	0	0	S	1	1	0.0199978	S	2	2	0.039983	S	1	1	0.0209653	S	2	2	0.0245115	S	2	2	0.0300761	S	3	3	0.0723516	S	0.0393019	2	2	S	3	4	0.10217	S	3	4	0.0717562	S	3	4	0.0977346	S	2	3
2197	FAU	6		0	0	0	S	2	2	0.0210156	S	1	1	0.00570267	S	1	1	0.0045958	S	2	2	0.0214069	S	2	2	0.0235697	R	2	3	0.0256307	S	0.0252181	2	2	S	2	2	0.0644859	S	2	2	0.0517514	S	2	2	0.0594543	S	2	3
3838	KPNA2	29		0	0	0	S	2	2	0.0100084	S	3	3	0.0224409	S	2	2	0.0154671	R	1	1	0.00436639	S	1	1	0.00616954	R	1	1	0.0068156	R	0.00715238	2	2	S	11	15	0.242611	S	7	8	0.156924	S	11	16	0.449074	S	11	19
79869	CPSF7	25.5		0	0	0	S	1	1	0.00195107	S	1	1	0.00201523	S	1	1	0.00222967	R	1	1	0.000349438	A	1	1	0.00216565	S	1	1	0.00301445	S	0.00333957	1	1	S	1	1	0.00470372	S	1	1	0.00767079	S	2	2	0.00987677	S	7	8
56922	MCCC1	41.5		0	0	0	S	2	2	0.00874926	S	3	3	0.0180953	R	1	1		S	1	1	0.00594992	S	2	2	0.0099886	S	2	2	0.0170923	S	0.0105067	2	2	S	2	2	0.00934047	S	1	1	0.00879805		0	0	0	S	1	1
7133	TNFRSF1B	19.5		0	0	0	A	1	3	0.0237739	A	1	1	0.185783	A	1	1	0.109507	A	1	2	0.144073	A	1	3	0.0223378	A	1	3		A	0.102282	1	1	S	1	3	0.64531	S	1	3			0	0	0	A	1	6
51203	NUSAP1	27.9375		0	0	0	S	1	1	0.0060568	S	2	2	0.0141287	S	2	2	0.017444	S	2	2	0.0149496	R	1	1	0.000843014	S	2	2	0.0133181	S	0.0153392	2	2		0	0	0		0	0	0	S	2	2	0.0268028	S	3	3
1460	CSNK2B	12		0	0	0	S	1	1	0.0608679	R	2	2	0.0522576	S	1	1	0.0161756	A	1	1	0.00691559	S	1	1	0.0451276		0	0	0	S	0.0468893	2	2		0	0	0	S	1	1	0.00976674	S	2	2	0.04785	S	1	2
5441	POLR2L	5		0	0	0	S	2	2	0.0319437	S	1	1	0.00800007		0	0	0	S	2	2	0.0314867	R	1	1	0.0117468	S	2	2	0.0337869	S	0.0315882	3	2	S	2	4	0.448674	S	2	6	0.30345	S	2	3	0.249908	S	3	5
51621	KLF13	20		0	0	0	S	1	1	0.00628983	S	2	2	0.014888		0	0	0	S	1	1	0.00756951	S	2	2	0.00910407	S	2	2	0.010058	S	0.00244214	1	1	S	1	1	0.0032571		0	0	0		0	0	0		0	0
138151	NACC2	32		0	0	0	R	1	1	0.00179441	R	2	2	0.00596783		0	0	0	S	1	1	0.000892105	A	1	1	0.00193943	S	1	1	0.00222425	A	0.00290215	1	1		0	0	0	S	1	1	0.00147552	S	1	1	0.00284326	S	2	3
2959	GTF2B	22.5		0	0	0	S	2	2	0.0161811	S	4	4	0.0287397		0	0	0	S	3	3	0.0194152	S	3	3	0.0189163		0	0	0	S	0.0116117	2	2	S	1	1	0.0150763		0	0	0		0	0	0		0	0
7705	ZNF146	22		0	0	0	S	1	1	0.0040174	S	1	1	0.00471294		0	0	0	S	1	1	0.00450704	S	1	1	0.0044091		0	0	0	S	0.00485641	1	1		0	0	0	S	1	1	0.00548383	S	1	1	0.0120944	S	1	1
5433	POLR2D	10		0	0	0	A	1	1	0.00849813	S	1	1	0.00438872		0	0	0	S	5	5	0.0302069	S	1	1	0.00449436		0	0	0		0	0	0	S	1	1	0.00469377	S	1	1	0.00292438	S	1	1	0.00393033	S	1	1
7204	TRIO	153.375		0	0	0	A	1	1	0.0221104	A	1	2	0.0195477	R	1	1	0.0154953	A	1	1	0.015012		0	0	0		0	0	0	A	0.0284792	1	1	S	1	1	0.0178413	S	1	1	0.0129169	S	1	1	0.0133621	S	5	6
92106	OXNAD1	27.75		0	0	0	R	1	1	0.0278249	R	1	2	0.0391715	A	1	3	0.248735	A	1	3	0.0442883		0	0	0		0	0	0		0	0	0		0	0	0		0	0	0	S	1	1	0.0523555	S	1	1
339965	CCDC158	81		0	0	0	A	1	2	0.0883348	A	1	1	0.0288673		0	0	0	A	1	2	0.0690852		0	0	0	A	2	3	0.0641226	R	0.0948039	2	1		0	0	0		0	0	0	S	1	1	0.014333		0	0
79109	MAPKAP1	26.7		0	0	0	R	1	1	0.0030402	R	2	2	0.00485424		0	0	0	S	1	1	0.0024857		0	0	0	R	1	1	0.00353982		0	0	0	S	2	2	0.0134277	S	2	2	0.0102478	S	3	4	0.0201312	S	2	2
4864	NPC1	56.6667		0	0	0	S	1	1	0.00837349	S	1	1	0.00529073		0	0	0	R	1	1	0.0199225		0	0	0		0	0	0	A	0.337021	1	1		0	0	0		0	0	0		0	0	0		0	0
6203	RPS9	10.3333		0	0	0	S	1	1	0.00148162	S	1	1	0.00346037		0	0	0	R	1	1	0.0103134		0	0	0		0	0	0		0	0	0		0	0	0	S	1	1	0.00428711		0	0	0	S	5	5
27350	APOBEC3C	13		0	0	0	S	1	1	0.0259069	S	2	2	0.027558	A	1	1	0.00203152	S	1	1	0.00466235	S	2	2	0.0412347	S	2	2	0.0365828	S	0.0346377	2	2		0	0	0		0	0	0		0	0	0		0	0
3043	HBB	11		0	0	0	S	3	3	0.0390912	R	1	1	0.0274212	S	1	1	0.00161163	S	1	1	0.00143194		0	0	0		0	0	0		0	0	0		0	0	0		0	0	0		0	0	0		0	0
7001	PRDX2	14		0	0	0	S	2	2	0.00958716	S	4	4	0.0713857	A	1	1	0	A	1	1	0		0	0	0	S	1	1	0.00466337	S	0.00617921	1	1	S	7	7	0.111679	A	1	1	0		0	0	0	R	1	1
2122	MECOM	63.8		0	0	0	R	1	1	0.00614179	R	1	1	0.00438615	S	1	1	0.00650643		0	0	0	R	1	1	0.005278	A	2	2	0.00857633	S	0.00789511	1	1		0	0	0		0	0	0		0	0	0		0	0
196528	ARID2	56.25		0	0	0	S	1	1	0.00252503	R	1	1	0.00168899		0	0	0		0	0	0	A	1	1	0.00116043	S	2	2	0.00261807	S	0.00356933	1	1		0	0	0		0	0	0		0	0	0	S	9	9
23286	WWC1	36.5		0	0	0	S	1	1	0.0204191	S	1	1	0.0203348		0	0	0		0	0	0	R	1	1	0.0203575	S	1	1	0.0174067	S	0.0178281	1	1		0	0	0		0	0	0		0	0	0		0	0
6675	UAP1	36		0	0	0	S	1	1	0.0318046	S	1	1	0.0370987		0	0	0		0	0	0	S	1	1	0.0336293		0	0	0		0	0	0		0	0	0		0	0	0		0	0	0		0	0
5709	PSMD3	39		0	0	0	A	1	1	0.00561587	S	2	2	0.00886819	S	1	1	0.00328265		0	0	0		0	0	0	S	2	2	0.00652008	S	0.0171719	2	2	S	2	2	0.0103639	S	1	1	0.00370048	S	3	3	0.0269334	S	9	12
22974	TPX2	46		0	0	0	A	1	1	0.00180181	S	3	3	0.00902719	S	1	1	0.00299821		0	0	0		0	0	0		0	0	0	S	0.00377197	1	1	S	4	4	0.0577878	S	4	4	0.0240759	S	8	9	0.145875	S	9	9
4430	MYO1B	69.8571		0	0	0	S	1	1	0.00230981	S	1	1	0.00263405	R	1	1	0.00314533		0	0	0		0	0	0		0	0	0	S	0.0115823	2	2	S	1	1	0.00293138		0	0	0		0	0	0	S	4	4
6160	RPL31	6.66667		0	0	0	R	1	1	0.00460613	S	1	1	0.0073596	A	1	1	0.00191003		0	0	0		0	0	0		0	0	0	R	0.00491615	1	1		0	0	0	S	1	1	0.00693996	S	1	1	0.0115133	S	2	2
6141	RPL18	8		0	0	0	R	1	1	0.00324252	S	1	1	0.00480499	S	1	1	0.00418451		0	0	0		0	0	0		0	0	0	S	0.00483323	1	1		0	0	0		0	0	0		0	0	0	S	2	2
6157	RPL27A	8		0	0	0	A	1	1	0.0151917	S	1	1	0.0173315		0	0	0		0	0	0		0	0	0	S	1	1	0.015745	S	0.0137289	1	1	S	2	3	0.0721353	S	2	2	0.0411052	S	2	3	0.0658865	S	3	4
383	ARG1	17.6667		0	0	0	S	1	1	0.00175931	S	1	1	0.00800759		0	0	0		0	0	0		0	0	0	A	1	1			0	0	0		0	0	0	S	1	1	0.00513426		0	0	0		0	0
84128	WDR75	45.3333		0	0	0	S	2	2	0.00461153	R	1	1	0.00470878		0	0	0		0	0	0		0	0	0		0	0	0	R	0.00568827	1	1	S	8	11	0.21576	S	6	8	0.116125	S	7	8	0.188323	S	5	5
100287896	LOC100287896	22		0	0	0	R	1	1	0.0104175	S	1	1	0.00517793		0	0	0		0	0	0		0	0	0		0	0	0	R	0.0043161	1	1	S	2	2	0.0372205	S	1	1	0.00988774		0	0	0		0	0
23012	STK38L	26		0	0	0	A	1	1	0.0332443	A	1	1	0.00452844		0	0	0		0	0	0		0	0	0		0	0	0		0	0	0	S	1	1		S	1	1	0.0516776	S	1	1			0	0
55051	NRDE2	58.2		0	0	0	A	1	1	0.0139291	A	1	1	0.222484		0	0	0		0	0	0		0	0	0		0	0	0		0	0	0	S	1	1	0.0051759		0	0	0		0	0	0		0	0
204801	NLRP11	50.5		0	0	0	R	1	1	0.699322		0	0	0	A	1	1	0.0161694	A	1	1	0.254351	R	1	2	0.572741		0	0	0	A	0.00679977	1	1	S	1	1	0.0342315	S	1	1	0.122311		0	0	0		0	0
1175	AP2S1	5.85714		0	0	0	S	1	1	0.00926106		0	0	0		0	0	0	S	1	1	0.0106303	S	1	1	0.0104922	S	1	1	0.0105181	S	0.013941	1	1	S	2	2	0.0787816	S	2	2	0.0386513	S	2	2	0.0870575	S	4	5
6911	TBX6	20		0	0	0	S	1	1	0.00474595		0	0	0		0	0	0	S	1	1	0.00579996	S	2	2	0.0128855	S	2	2	0.0134101	R	0.00926494	2	2	S	2	2	0.0110163	S	1	1	0.00536873	S	2	2	0.0121786		0	0
6636	SNRPF	6		0	0	0	R	1	1	0.0255446		0	0	0		0	0	0	R	1	1	0.0258594	A	1	1	0.0316707	S	1	1	0.0268587		0	0	0	S	1	1	0.0217436		0	0	0	S	1	2	0.0344429	S	2	5
6146	RPL22	6		0	0	0	S	1	1	0.00540865		0	0	0		0	0	0	S	1	1	0.0055565	A	1	1	0.00538434		0	0	0	R	0.00589599	1	1	S	4	4	0.135616	S	4	4	0.106287	S	3	3	0.0849886	S	4	4
6621	SNAPC4	77.3333		0	0	0	A	1	1	0.00835744		0	0	0		0	0	0	R	1	1	0.0184281	S	1	1	0.0214939		0	0	0		0	0	0		0	0	0		0	0	0		0	0	0	S	4	4
51134	CEP83	37.25		0	0	0	R	1	1	0.00753921		0	0	0		0	0	0	S	1	1	0.007336	A	1	1	0.00873198		0	0	0		0	0	0		0	0	0		0	0	0		0	0	0		0	0
5239	PGM5	25.3333		0	0	0	S	1	1	0.1315		0	0	0		0	0	0	S	1	1	0.00878042		0	0	0	S	1	1	0.173405	S	0.00407211	1	1	S	1	1	0.190068	S	1	1	0.0965381	S	1	1	0.157544	S	1	1
5439	POLR2J	4.66667		0	0	0	S	1	1	0.00957311		0	0	0		0	0	0	R	1	1	0.00896395		0	0	0	S	1	1	0.00960232		0	0	0	S	3	3	0.0305937		0	0	0	S	1	1	0.00138031	S	1	2
26509	MYOF	136		0	0	0	S	1	1	0.0100833		0	0	0		0	0	0	S	2	2	0.024687		0	0	0	R	1	1	0.0203279		0	0	0		0	0	0		0	0	0		0	0	0		0	0
79170	PRR15L	5		0	0	0	R	1	1	0.00456363		0	0	0		0	0	0	S	1	1	0.00855155		0	0	0	R	1	1	0.00435742		0	0	0		0	0	0		0	0	0		0	0	0		0	0
340252	ZNF680	20.8333		0	0	0	R	1	1	0.0016132		0	0	0		0	0	0	S	1	1	0.000954726		0	0	0		0	0	0		0	0	0		0	0	0		0	0	0		0	0	0		0	0
140685	ZBTB46	29.6667		0	0	0	S	1	1	0.00351084		0	0	0	S	2	2	0.00585283		0	0	0	S	2	2	0.00907076	S	2	2	0.00868004	S	0.00438917	1	1	S	1	1	0.00261918		0	0	0		0	0	0		0	0
79724	ZNF768	41.6667		0	0	0	R	1	1	0.00302508		0	0	0	R	1	1	0.00328105		0	0	0	S	1	1	0.00337844		0	0	0		0	0	0		0	0	0		0	0	0		0	0	0		0	0
81704	DOCK8	116		0	0	0	R	1	1	0.0163595		0	0	0		0	0	0		0	0	0	R	1	1	0.00661351	S	1	1	0.00942766		0	0	0		0	0	0		0	0	0		0	0	0	R	1	1
80000	GREB1L	114.9		0	0	0	R	1	1	0.00119243		0	0	0		0	0	0		0	0	0	S	1	1	0.00285736		0	0	0		0	0	0	S	1	1	0.0082097	S	1	1	0.00606728		0	0	0		0	0
2072	ERCC4	47.5		0	0	0	S	1	1	0.00251983		0	0	0	A	1	1			0	0	0		0	0	0	S	2	2	0.00365812	S	0.00367238	2	2	S	2	3	0.0239049	S	3	4	0.0228204	S	6	7	0.131192	S	6	7
8852	AKAP4	59		0	0	0	A	1	1	0.027273		0	0	0	A	1	1	0.0103869		0	0	0		0	0	0	A	1	1	0.00793401		0	0	0		0	0	0	S	1	1	0.00959545		0	0	0		0	0
9648	GCC2	118.4		0	0	0	S	1	1			0	0	0	S	1	1			0	0	0		0	0	0	S	1	1			0	0	0		0	0	0		0	0	0		0	0	0	S	1	1
81930	KIF18A	43.5		0	0	0	S	1	1			0	0	0	S	1	1			0	0	0		0	0	0	S	1	1			0	0	0		0	0	0		0	0	0		0	0	0		0	0
27152	INTU	43.2		0	0	0	R	1	1	0.0268151		0	0	0	A	1	1	0.0161629		0	0	0		0	0	0		0	0	0	R	0.0142663	1	1	S	1	1	0.000260958		0	0	0		0	0	0		0	0
10735	STAG2	70		0	0	0	S	1	1	0.00258541		0	0	0	S	1	1	0.00359755		0	0	0		0	0	0		0	0	0		0	0	0	S	5	5	0.0385286	S	1	1	0.00833503	S	7	8	0.083303	S	11	14
84529	C15orf41	12.25		0	0	0	A	1	1	0.0054732		0	0	0	A	1	1	0.00489258		0	0	0		0	0	0		0	0	0		0	0	0		0	0	0	S	1	1			0	0	0		0	0
8892	EIF2B2	21		0	0	0	R	1	1	0.00573477		0	0	0	A	1	1	0.00595202		0	0	0		0	0	0		0	0	0		0	0	0		0	0	0		0	0	0		0	0	0	S	1	1
23382	AHCYL2	31.8333		0	0	0	S	1	1	0.00359458		0	0	0	A	1	1	0.00377203		0	0	0		0	0	0		0	0	0		0	0	0		0	0	0		0	0	0		0	0	0		0	0
1459	CSNK2A2	17		0	0	0	S	1	1	0.00299752		0	0	0		0	0	0		0	0	0		0	0	0	S	1	1	0.004744	S	0.00677782	2	2	S	1	1	0.0139359	S	1	1	0.00898364	S	2	2	0.0318866	S	5	5
382	ARF6	9		0	0	0	S	1	1	0.000950986		0	0	0		0	0	0		0	0	0		0	0	0	R	1	1	0.00234138	S	0.00557459	2	2	S	2	2	0.0280544		0	0	0	S	3	3	0.0265317	S	3	6
3958	LGALS3	12.5		0	0	0	S	1	1	0.00336305		0	0	0		0	0	0		0	0	0		0	0	0	S	1	1	0.0049512		0	0	0	S	1	1	0.00206541	S	1	1	0.00386074		0	0	0		0	0
124783	SPATA32	21		0	0	0	A	1	1	0.128411		0	0	0		0	0	0		0	0	0		0	0	0	A	1	1			0	0	0		0	0	0	S	1	1	0.00763923		0	0	0		0	0
3098	HK1	56.5714		0	0	0	S	1	1	0.00448761		0	0	0		0	0	0		0	0	0		0	0	0		0	0	0	S	0.0110635	2	2	S	3	4	0.02581	S	1	1	0.00432539	S	4	4	0.0362013	S	4	5
26130	GAPVD1	67.6364		0	0	0	A	1	1	0.00321905		0	0	0		0	0	0		0	0	0		0	0	0		0	0	0	A	0.0108305	1	1		0	0	0		0	0	0		0	0	0	S	2	2
6452	SH3BP2	41		0	0	0	A	1	1	0.00416402		0	0	0		0	0	0		0	0	0		0	0	0		0	0	0		0	0	0	S	1	2	0.017399	S	1	2	0.0109618	S	1	2	0.0128056	A	1	1
2175	FANCA	54.2727		0	0	0	A	1	1	0.00173354		0	0	0		0	0	0		0	0	0		0	0	0		0	0	0		0	0	0	S	2	2	0.0116045	S	2	2	0.0106695	S	2	2	0.00771552	S	3	3
139189	DGKK	67		0	0	0	A	1	1	0.0140404		0	0	0		0	0	0		0	0	0		0	0	0		0	0	0		0	0	0	S	1	1	0.00446752	S	1	1	0.00494549	S	1	1	0.000901392		0	0
51291	GMIP	49.8571		0	0	0	A	1	1	0.0086752		0	0	0		0	0	0		0	0	0		0	0	0		0	0	0		0	0	0	S	1	2	0.0773752	S	1	1	0.036908	S	1	1	0.00870879	S	4	6
55669	MFN1	46.5		0	0	0	R	1	1	0.00542734		0	0	0		0	0	0		0	0	0		0	0	0		0	0	0		0	0	0	S	1	1	0.0151722		0	0	0	S	1	1	0.014989	R	1	1
2153	F5	105		0	0	0	A	1	1	0.774905		0	0	0		0	0	0		0	0	0		0	0	0		0	0	0		0	0	0	S	1	1	0.00727463		0	0	0	S	1	1	0.00204087		0	0
10238	DCAF7	19		0	0	0	S	1	1	0.0100797		0	0	0		0	0	0		0	0	0		0	0	0		0	0	0		0	0	0	S	1	1	0.00796825		0	0	0	S	1	1	0.0144768	S	3	3
29115	SAP30BP	16.4167		0	0	0	A	1	1	0.0381867		0	0	0		0	0	0		0	0	0		0	0	0		0	0	0		0	0	0		0	0	0		0	0	0	S	2	2	0.00670065	R	1	1
51566	ARMCX3	21		0	0	0	A	1	1	0.0364654		0	0	0		0	0	0		0	0	0		0	0	0		0	0	0		0	0	0		0	0	0		0	0	0	S	1	1	0.0260853		0	0
114787	GPRIN1	86		0	0	0	S	1	1	0.00557149		0	0	0		0	0	0		0	0	0		0	0	0		0	0	0		0	0	0		0	0	0		0	0	0		0	0	0		0	0
85021	REPS1	48.9091		0	0	0	A	1	1	0.000765118		0	0	0		0	0	0		0	0	0		0	0	0		0	0	0		0	0	0		0	0	0		0	0	0		0	0	0	S	1	1
79868	ALG13	36.1786		0	0	0	A	1	1	0.0215396		0	0	0		0	0	0		0	0	0		0	0	0		0	0	0		0	0	0		0	0	0		0	0	0		0	0	0	S	5	6
9632	SEC24C	55		0	0	0	S	1	1	0.00642188		0	0	0		0	0	0		0	0	0		0	0	0		0	0	0		0	0	0		0	0	0		0	0	0		0	0	0	S	1	1
23135	KDM6B	89.5		0	0	0	S	1	1	0.00139612		0	0	0		0	0	0		0	0	0		0	0	0		0	0	0		0	0	0		0	0	0		0	0	0		0	0	0		0	0
169834	ZNF883	25		0	0	0	S	1	2	0.0250227		0	0	0		0	0	0		0	0	0		0	0	0		0	0	0		0	0	0		0	0	0		0	0	0		0	0	0		0	0
284358	MAMSTR	18.1111		0	0	0	S	1	1	4.39632e-05		0	0	0		0	0	0		0	0	0		0	0	0		0	0	0		0	0	0		0	0	0		0	0	0		0	0	0		0	0
57608	JCAD	80.5		0	0	0	S	1	1	0.021547		0	0	0		0	0	0		0	0	0		0	0	0		0	0	0		0	0	0		0	0	0		0	0	0		0	0	0		0	0
83659	TEKT1	26.5		0	0	0	S	1	2	0.00247731		0	0	0		0	0	0		0	0	0		0	0	0		0	0	0		0	0	0		0	0	0		0	0	0		0	0	0		0	0
84946	LTV1	20.5		0	0	0	S	1	2	0.00539823		0	0	0		0	0	0		0	0	0		0	0	0		0	0	0		0	0	0		0	0	0		0	0	0		0	0	0		0	0
6204	RPS10	12		0	0	0	R	1	1	0.00408835	S	1	1	0.00394665	S	1	1	0.00171751	S	1	1	0.0044672	S	1	1	0.00353284		0	0	0		0	0	0	S	1	1	0.0103152	S	1	1	0.00429298	S	2	2	0.0283838	S	5	8
100529239	RPS10-NUDT3	20		0	0	0	R	1	1	0.00408835	S	1	1	0.00394665	S	1	1	0.00171751	S	1	1	0.0044672	S	1	1	0.00353284		0	0	0		0	0	0	S	1	1	0.0103152	S	1	1	0.00429298	A	1	1	0	A	4	7
23633	KPNA6	29.3333		0	0	0	S	1	2	0.00359639	S	1	1	0.00182233		0	0	0	S	1	2	0.0045936	S	1	2	0.00475141	S	1	1	0.0019876	S	0.00170651	1	1	S	4	4	0.0311266	S	2	5	0.0247963	S	7	13	0.126134	S	7	13
3836	KPNA1	23.3333		0	0	0	S	1	2	0.00359639	S	1	1	0.00182233		0	0	0	S	1	2	0.0045936	S	1	2	0.00475141	S	1	1	0.0019876	S	0.00170651	1	1	S	5	5	0.101032	S	5	8	0.132061	S	4	6	0.207374	S	9	12
3841	KPNA5	24.125		0	0	0	S	1	2	0.00359639	S	1	1	0.00182233		0	0	0	S	1	2	0.0045936	S	1	2	0.00475141	S	1	1	0.0019876	S	0.00170651	1	1	A	3	3	0	A	1	4	0	A	3	5	0	A	4	7
54566	EPB41L4B	45.4444		0	0	0	A	1	1	0.00258909	R	1	1	0.00244593		0	0	0	S	1	1	0.00225798	R	1	1	0.00179333		0	0	0		0	0	0	S	1	1	0.00383704	S	1	1	0.00298601	S	1	1	0.00493395		0	0
57669	EPB41L5	33.7143		0	0	0	A	1	1	0.00258909	R	1	1	0.00244593		0	0	0	S	1	1	0.00225798	R	1	1	0.00179333		0	0	0		0	0	0	S	1	1	0.00383704	S	1	1	0.00298601	S	1	1	0.00493395		0	0
5042	PABPC3	46		0	0	0	S	2	2	0.00526159	A	2	2	0	A	2	2	0	R	1	1	0.00382704	S	1	1	0.00453233	A	1	1	0	A	0	1	1	A	1	2	0	S	1	1	0.00640747	A	1	2	0	A	1	3
3975	LHX1	18		0	0	0	S	1	1	0.00194832		0	0	0		0	0	0		0	0	0	S	1	1	0.0019187	S	1	1	0.00116348	S	0.00213538	1	1		0	0	0		0	0	0	S	1	1	0.00207052		0	0
64211	LHX5	19		0	0	0	S	1	1	0.00194832		0	0	0		0	0	0		0	0	0	S	1	1	0.0019187	S	1	1	0.00116348	S	0.00213538	1	1		0	0	0		0	0	0	S	1	1	0.00207052		0	0
51631	LUC7L2	18.6667		0	0	0	A	1	1	0.000969566		0	0	0		0	0	0		0	0	0		0	0	0		0	0	0	A	0.00124793	1	1	S	2	2	0.0118984		0	0	0	S	3	3	0.021326	S	5	5
100996928	FMC1-LUC7L2	21		0	0	0	A	1	1	0.000969566		0	0	0		0	0	0		0	0	0		0	0	0		0	0	0	A	0.00124793	1	1	A	1	1	0		0	0	0	A	2	2	0	A	3	3
8681	JMJD7-PLA2G4B	58		0	0	0	A	1	2	0.00601141		0	0	0		0	0	0		0	0	0		0	0	0		0	0	0		0	0	0	S	1	1	0.0039925	S	1	1	0.0046523	S	1	1	0.00333341		0	0
100137049	PLA2G4B	45		0	0	0	A	1	2	0.00601141		0	0	0		0	0	0		0	0	0		0	0	0		0	0	0		0	0	0	S	1	1	0.0039925	S	1	1	0.0046523	S	1	1	0.00333341		0	0
51622	CCZ1	35		0	0	0	A	1	1	0.00790104		0	0	0		0	0	0		0	0	0		0	0	0		0	0	0		0	0	0		0	0	0		0	0	0	S	1	2	0.0140961	S	10	14
221960	CCZ1B	35		0	0	0	A	1	1	0.00790104		0	0	0		0	0	0		0	0	0		0	0	0		0	0	0		0	0	0		0	0	0		0	0	0	S	1	2	0.0140961	S	10	14
27153	ZNF777	58		0	0	0	S	1	1			0	0	0		0	0	0		0	0	0		0	0	0		0	0	0		0	0	0		0	0	0		0	0	0		0	0	0		0	0
100289678	ZNF783	45		0	0	0	S	1	1			0	0	0		0	0	0		0	0	0		0	0	0		0	0	0		0	0	0		0	0	0		0	0	0		0	0	0		0	0
2735	GLI1	51.75		0	0	0	A	1	1	0	A	1	1	0	A	1	1	0	S	1	1	0.00138861	A	1	1	0	A	1	1	0	A	0	1	1		0	0	0		0	0	0		0	0	0		0	0
2736	GLI2	67.3333		0	0	0	A	1	1	0	A	1	1	0	A	1	1	0	S	1	1	0.00138861	A	1	1	0	A	1	1	0	A	0	1	1		0	0	0		0	0	0		0	0	0		0	0
2737	GLI3	74.3333		0	0	0	A	1	1	0	A	1	1	0	A	1	1	0	S	1	1	0.00138861	A	1	1	0	A	1	1	0	A	0	1	1		0	0	0		0	0	0		0	0	0		0	0
148979	GLIS1	36.8		0	0	0	A	1	1	0	A	1	1	0	A	1	1	0	S	1	1	0.00138861	A	1	1	0	A	1	1	0	A	0	1	1		0	0	0		0	0	0		0	0	0		0	0
169792	GLIS3	36.7143		0	0	0	A	1	1	0	A	1	1	0	A	1	1	0	S	1	1	0.00138861	A	1	1	0	A	1	1	0	A	0	1	1		0	0	0		0	0	0		0	0	0		0	0
3045	HBD	11		0	0	0	A	2	2	0		0	0	0	S	1	1	0.00161163	S	1	1	0.00143194		0	0	0		0	0	0		0	0	0		0	0	0		0	0	0		0	0	0		0	0
3046	HBE1	12		0	0	0	A	1	1	0		0	0	0		0	0	0	S	1	1	0.00143194		0	0	0		0	0	0		0	0	0		0	0	0		0	0	0		0	0	0		0	0
3047	HBG1	12		0	0	0	A	1	1	0		0	0	0		0	0	0	S	1	1	0.00143194		0	0	0		0	0	0		0	0	0		0	0	0		0	0	0		0	0	0		0	0
3048	HBG2	12		0	0	0	A	1	1	0		0	0	0		0	0	0	S	1	1	0.00143194		0	0	0		0	0	0		0	0	0		0	0	0		0	0	0		0	0	0		0	0
5519	PPP2R1B	39.4		0	0	0	A	1	1	0		0	0	0	A	1	1	0	A	2	2	0	A	1	1	0	A	3	3	0	A	0	1	1	A	3	3	0	A	2	3	0	A	3	4	0	S	5	10
653073	GOLGA8J	36.6667		0	0	0	A	2	2	0		0	0	0		0	0	0		0	0	0	S	1	1	0.0015568	S	1	1	0.00180688		0	0	0		0	0	0		0	0	0		0	0	0		0	0
9203	ZMYM3	58.6667		0	0	0	A	1	1	0		0	0	0	A	1	1	0		0	0	0		0	0	0	A	1	1	0	S	0.00938134	2	2	S	2	2	0.0176862		0	0	0	S	3	4	0.06956	S	9	12
7184	HSP90B1	51		0	0	0	A	1	1	0		0	0	0		0	0	0		0	0	0		0	0	0		0	0	0		0	0	0		0	0	0		0	0	0		0	0	0	S	2	3
813	CALU	15.1667		0	0	0		0	0	0	R	1	1	0.00796216	R	1	1	0.00392116	R	1	1	0.0049429	R	1	1	0.00521219	R	1	1	0.00666281	S	0.00931441	2	2	S	2	2	0.0139828	S	1	1	0.00501453	S	2	2	0.0210575	S	1	1
7273	TTN	1906.42		0	0	0		0	0	0	A	1	1	0.73599	A	1	1	0.0230843	A	1	1	0.969153	A	2	2	0.00489692	A	1	1	0.018113	A	0.746528	1	1	S	1	1	0.00145293	S	1	1	0.0772848	S	1	1	0.0638908	A	1	2
7468	NSD2	54		0	0	0		0	0	0	A	1	1	0.00424847	S	1	1	0.00389601	A	1	1	0.00319665	A	1	1	0.00245328	S	1	1	0.0044278		0	0	0	S	1	1	0.00521713		0	0	0		0	0	0		0	0
3301	DNAJA1	19		0	0	0		0	0	0	S	1	1	0.00384709		0	0	0	A	1	1	0.00269763	S	2	3	0.0196336	S	1	1	0.00602019	S	0.0211101	3	2	S	4	5	0.196903	S	4	5	0.18503	S	5	7	0.280477	S	8	14
64398	MPP5	42		0	0	0		0	0	0	S	1	1	0.00375763		0	0	0	R	1	1	0.00203121	S	1	1	0.00217925	A	1	1	0.00311663	S	0.00385772	1	1		0	0	0		0	0	0		0	0	0		0	0
10906	TRAFD1	34		0	0	0		0	0	0	A	1	1	0.0146152		0	0	0	R	1	1	0.00945617	R	1	1	0.0103551	R	1	1	0.011791		0	0	0		0	0	0	S	1	1	0.0282241		0	0	0	A	1	1
6229	RPS24	4.2		0	0	0		0	0	0	S	1	1	0.00386565		0	0	0	S	1	1	0.00626465	S	1	1	0.00449678		0	0	0	A	0.00362601	1	1	S	2	2	0.024274	S	2	2	0.0168199	S	2	2	0.0287166	S	4	5
55082	ARGLU1	15		0	0	0		0	0	0	R	1	1	0.00330243		0	0	0	S	1	1	0.00463086	S	1	1	0.00272231		0	0	0		0	0	0	S	4	4	0.0258686	S	1	1	0.00818624	S	4	4	0.0377887	S	3	3
54934	KANSL2	29		0	0	0		0	0	0	S	1	1	0.00209481	R	2	2	0.00315229	S	1	1	0.00215054		0	0	0	R	1	1	0.000880893	S	0.00305216	1	1	S	3	3	0.0115745	S	4	4	0.0148702	S	3	3	0.0162086	S	2	2
2803	GOLGA4	160.235		0	0	0		0	0	0	A	1	1	0.00603696	S	1	1	0.00401665	A	1	1	0.00449577		0	0	0	S	1	1	0.00691442	A	0.00580942	1	1		0	0	0		0	0	0	S	1	1	0.00500144	S	5	5
6635	SNRPE	4		0	0	0		0	0	0	S	1	1	0.0106443	S	1	1	0.00270095	S	1	1	0.00527863		0	0	0	A	1	1	0.00254392		0	0	0	S	1	3	0.0824339	S	2	3	0.0755259	S	2	2	0.114891	S	2	5
4920	ROR2	35.8		0	0	0		0	0	0	S	1	3	0.161274	R	1	2	0.0148146	R	1	1	0.00516583		0	0	0	A	1	1	0.00943097		0	0	0		0	0	0		0	0	0		0	0	0		0	0
56943	ENY2	3		0	0	0		0	0	0	S	1	1	0.0736207	S	1	1	0.0309318	R	2	2	0.0465529		0	0	0		0	0	0	S	0.0476839	2	2	S	2	2	0.0901184	S	2	3	0.0233454	S	2	2	0.12445	S	2	2
26133	TRPC4AP	42.4		0	0	0		0	0	0	A	1	1	0.0645383	A	1	1	0.0419519	R	1	1	0.0887312		0	0	0		0	0	0	A	0.068673	1	1	S	1	1	0.105912		0	0	0		0	0	0	R	1	1
8189	SYMPK	77		0	0	0		0	0	0	S	1	1	0.00139603	S	2	2	0.00767228	R	1	1	0.00104581		0	0	0		0	0	0	S	0.0103383	2	2		0	0	0	S	1	1	0.00985231	S	14	19	0.184197	S	29	47
7580	ZNF32	21.6667		0	0	0		0	0	0	S	1	1	0.00197431	S	1	1	0.00133155	S	1	1	0.0040104		0	0	0		0	0	0		0	0	0	S	1	1	0.00463283	S	1	1	0.00393191		0	0	0		0	0
7226	TRPM2	81		0	0	0		0	0	0	S	1	1	0.012729		0	0	0	A	1	1	0.00498765		0	0	0	S	1	1	0.0100575		0	0	0	S	1	1	0.0171804		0	0	0	S	1	1	0.0146499	S	1	1
57798	GATAD1	14.5		0	0	0		0	0	0	S	1	1	0.00881278		0	0	0	R	2	2	0.0139598		0	0	0		0	0	0	S	0.005519	1	1	S	3	7	0.145223	S	3	4	0.0697513	S	5	8	0.15383	S	4	6
3939	LDHA	22.2		0	0	0		0	0	0	S	2	2	0.0163131		0	0	0	S	1	1	0.00506527		0	0	0		0	0	0	S	0.00304108	1	1	S	2	2	0.0083424	S	1	1	0.0020692		0	0	0		0	0
23429	RYBP	11		0	0	0		0	0	0	S	1	1	0.00905584		0	0	0	A	1	1	0.00807459		0	0	0		0	0	0	R	0.00495261	1	1	S	1	2	0.0319093		0	0	0	S	1	2	0.0204448	R	1	1
7743	ZNF189	40		0	0	0		0	0	0	S	2	2	0.00453849		0	0	0	S	1	1	0.0016275		0	0	0		0	0	0	S	0.00372926	1	1		0	0	0		0	0	0		0	0	0		0	0
4809	SNU13	8.5		0	0	0		0	0	0	S	1	1	0.00416389		0	0	0	S	1	1	0.00677538		0	0	0		0	0	0		0	0	0	S	2	3	0.0702563	S	1	2	0.0441652	S	1	1	0.0383583	S	1	1
8874	ARHGEF7	46.5		0	0	0		0	0	0	R	1	1	0.00346446		0	0	0	S	1	2	0.00392516		0	0	0		0	0	0		0	0	0		0	0	0		0	0	0		0	0	0	S	2	2
2001	ELF5	10.6667		0	0	0		0	0	0	S	1	1	0.00701594		0	0	0	S	1	1	0.00462991		0	0	0		0	0	0		0	0	0		0	0	0		0	0	0		0	0	0		0	0
2312	FLG	164		0	0	0		0	0	0	S	2	2	0.0243331		0	0	0	A	1	1	0.00114753		0	0	0		0	0	0		0	0	0		0	0	0		0	0	0		0	0	0		0	0
10916	MAGED2	36		0	0	0		0	0	0	R	1	1	0.00329935	S	2	2	0.00766973	S	1	1	0.00160672		0	0	0		0	0	0	S	0.016469	3	3	S	2	2	0.0188593		0	0	0	S	8	9	0.21251	S	21	42
23383	MAU2	30		0	0	0		0	0	0	S	2	3	0.00765646	S	2	2	0.00763645		0	0	0	A	2	2	0.0031237	R	1	1	0.00292887	R	0.00527172	2	2	S	2	2	0.0188512	S	4	4	0.0212345	S	3	4	0.029308	S	5	6
63929	XPNPEP3	19		0	0	0		0	0	0	S	1	1	0.00381861	S	1	2	0.00795339		0	0	0	R	1	1	0.00323045	S	1	2	0.0054307	S	0.00906802	2	1	S	1	2	0.0318843	S	1	2	0.0155902	S	1	2	0.0294391	S	1	3
79631	EFL1	51.25		0	0	0		0	0	0	S	1	1	0.169622	S	1	1	0.0965335		0	0	0	S	1	1	0.198834	S	1	1	0.159512	S	0.140725	2	1	S	1	1	0.13756		0	0	0		0	0	0	R	1	1
55740	ENAH	40.7273		0	0	0		0	0	0	S	1	2	0.00502797	A	1	1	0.00162589		0	0	0	S	1	2	0.00307493	R	1	1	0.000940529	S	0.00198038	1	1	S	1	1	0.000246673		0	0	0		0	0	0		0	0
26227	PHGDH	30		0	0	0		0	0	0	S	1	1	0.00276528	A	1	1	0.00161522		0	0	0	A	1	1	0.000807507		0	0	0	S	0.00189756	1	1	S	2	2	0.0159398	S	3	3	0.011049	S	9	11	0.280302	S	16	26
55602	CDKN2AIP	23		0	0	0		0	0	0	S	1	1	0.00583187	S	1	1	0.00858583		0	0	0	A	1	1	0.00308068		0	0	0	S	0.022158	3	3	S	1	1	0.00415102	S	2	2	0.0126733	S	3	3	0.0437677	S	4	4
10419	PRMT5	37.3333		0	0	0		0	0	0	R	1	1	0.00779995	R	2	2	0.0027868		0	0	0	A	1	1	0.00156651		0	0	0	R	0.00160787	1	1		0	0	0		0	0	0		0	0	0	S	2	2
8648	NCOA1	75.6667		0	0	0		0	0	0	S	1	1	0.00625514	S	1	1	0.00742031		0	0	0	S	1	1	0.00285221		0	0	0		0	0	0		0	0	0		0	0	0		0	0	0		0	0
23527	ACAP2	29.1111		0	0	0		0	0	0	R	1	1	0.00120467		0	0	0		0	0	0	A	1	1	0.000719139	A	1	2	0.00247156	A	0.000332492	1	1	S	1	2	0.00296766		0	0	0	S	1	1	0.00158091	A	1	1
64319	FBRS	49.25		0	0	0		0	0	0	S	1	1			0	0	0		0	0	0	S	1	1	0.000686481	S	1	1	0.00168251	S	0.00214675	1	1	S	2	2	0.00855145		0	0	0	S	3	4	0.029358	S	2	3
120237	DBX1	19		0	0	0		0	0	0	S	1	1	0.0108447		0	0	0		0	0	0	R	1	1	0.0139427	S	1	2	0.0281011	S	0.0130062	1	1		0	0	0		0	0	0		0	0	0		0	0
339344	MYPOP	23.75		0	0	0		0	0	0	S	1	1	0.00427656		0	0	0		0	0	0	S	1	1	0.00335784	S	1	1	0.00387903		0	0	0	S	1	1	0.000700718	S	1	1	0.00123215	S	1	1	0.00113078	S	1	1
55663	ZNF446	21		0	0	0		0	0	0	R	1	1	0.00110131		0	0	0		0	0	0	R	1	1	0.000935293		0	0	0	S	0.00455778	1	1		0	0	0		0	0	0		0	0	0		0	0
27145	FILIP1	64.6		0	0	0		0	0	0	R	1	1	0.00758734		0	0	0		0	0	0	R	1	1	0.00979666		0	0	0		0	0	0		0	0	0	S	1	1	0.00257887		0	0	0		0	0
4134	MAP4	98.9722		0	0	0		0	0	0	A	1	1	0.000725616		0	0	0		0	0	0	A	1	1	0.041565		0	0	0		0	0	0		0	0	0		0	0	0	S	2	2	0.010871	S	3	3
203074	PRSS55	17		0	0	0		0	0	0	A	1	1	0.00127986		0	0	0		0	0	0	R	1	1	0.00184192		0	0	0		0	0	0		0	0	0		0	0	0	S	1	1	0.0037118		0	0
3716	JAK1	74		0	0	0		0	0	0	S	1	1	0.0239033		0	0	0		0	0	0	S	1	1	0.0115188		0	0	0		0	0	0		0	0	0		0	0	0		0	0	0		0	0
55311	ZNF444	13.8		0	0	0		0	0	0	S	1	1	0.00206721		0	0	0		0	0	0	S	1	1	0.00227857		0	0	0		0	0	0		0	0	0		0	0	0		0	0	0		0	0
11325	DDX42	52		0	0	0		0	0	0	R	1	1	0.00191611	R	1	1	0.00280166		0	0	0		0	0	0	A	1	1	0.00155915	S	0.00276806	1	1	S	1	1	0.00627907		0	0	0	S	4	4	0.0515916	S	13	14
222255	ATXN7L1	37.3		0	0	0		0	0	0	S	2	2	0.00887414	S	2	2	0.0108956		0	0	0		0	0	0	R	1	1	0.00695135	S	0.0041284	2	2		0	0	0		0	0	0		0	0	0		0	0
9092	SART1	38.3333		0	0	0		0	0	0	S	1	1	0.00242399	S	1	1	0.00459139		0	0	0		0	0	0	S	1	1	0.00204342		0	0	0	S	2	2	0.01885		0	0	0	S	5	7	0.0485249	S	11	11
2495	FTH1	12		0	0	0		0	0	0	R	1	1	0.0535905	R	1	1	0.050291		0	0	0		0	0	0	R	1	1	0.0332296		0	0	0		0	0	0		0	0	0		0	0	0	S	1	1
4659	PPP1R12A	54.8261		0	0	0		0	0	0	S	1	1	0.000871129	A	1	1	0.00108968		0	0	0		0	0	0		0	0	0	S	0.001069	1	1	S	2	2	0.0189596	S	2	2	0.0300259	S	4	4	0.0542257	S	5	7
9343	EFTUD2	57.6667		0	0	0		0	0	0	A	1	1	0.00128775	R	1	1	0.00382129		0	0	0		0	0	0		0	0	0	A	0.00366754	1	1	S	2	2	0.0263161	S	1	1	0.0123011	S	4	4	0.0564134	S	17	19
3329	HSPD1	35		0	0	0		0	0	0	A	1	1	0.00954387	R	1	1	0.00908039		0	0	0		0	0	0		0	0	0	S	0.00279182	2	2	S	3	3	0.0259174	S	1	1	0.00648817	S	14	16	0.380861	S	30	36
51663	ZFR	56		0	0	0		0	0	0	A	1	1	0.0041103	S	3	3	0.0111094		0	0	0		0	0	0		0	0	0	S	0.00990627	3	3	S	1	1	0.00455358		0	0	0	S	2	2	0.0236241	S	10	12
84172	POLR1B	62.8333		0	0	0		0	0	0	A	1	1	0.0036429	A	1	1	0.00366301		0	0	0		0	0	0		0	0	0		0	0	0	S	29	65	2.78666	S	28	60	2.00727	S	27	67	3.16097	S	28	59
51574	LARP7	31.8333		0	0	0		0	0	0	R	1	1	0.00593841	R	2	2	0.00657343		0	0	0		0	0	0		0	0	0		0	0	0		0	0	0	S	1	1	0.00544785		0	0	0	S	4	4
55841	WWC3	73		0	0	0		0	0	0	A	1	1	0.00142039	A	1	1	0.00158737		0	0	0		0	0	0		0	0	0		0	0	0		0	0	0		0	0	0	S	1	1	0.00408675		0	0
301	ANXA1	22.5		0	0	0		0	0	0	S	2	2	0.010691	S	1	1	0.00361636		0	0	0		0	0	0		0	0	0		0	0	0		0	0	0		0	0	0		0	0	0		0	0
84248	FYTTD1	20		0	0	0		0	0	0	S	1	1	0.00408081		0	0	0		0	0	0		0	0	0	S	1	1	0.00491567	R	0.00517262	1	1	S	1	1	0.00163219		0	0	0	S	1	1	0.00936918		0	0
6193	RPS5	10		0	0	0		0	0	0	A	1	1	0.0069741		0	0	0		0	0	0		0	0	0	S	2	2	0.0081505	A	0.00339504	1	1	S	2	2	0.031936		0	0	0	S	2	2	0.0473746	S	3	4
128239	IQGAP3	98.625		0	0	0		0	0	0	A	1	1	0.0143793		0	0	0		0	0	0		0	0	0	R	1	1	0.0149548	R	0.0143213	1	1	S	1	1	0.0166745		0	0	0		0	0	0	S	2	2
163589	TDRD5	55		0	0	0		0	0	0	A	1	1	0.0143793		0	0	0		0	0	0		0	0	0	R	1	1	0.0149548	R	0.0143213	1	1	S	1	1	0.0166745		0	0	0		0	0	0	S	1	1
23392	ECPAS	108.2		0	0	0		0	0	0	S	1	2	0.0241733		0	0	0		0	0	0		0	0	0	A	1	1	0.0251763	A	0.0238374	2	1		0	0	0		0	0	0		0	0	0		0	0
284611	FAM102B	24		0	0	0		0	0	0	R	1	1	0.0045777		0	0	0		0	0	0		0	0	0	R	1	1	0.00314623		0	0	0		0	0	0		0	0	0		0	0	0	S	2	2
140689	CBLN4	11		0	0	0		0	0	0	R	1	1	0.00392095		0	0	0		0	0	0		0	0	0	S	1	1	0.00408036		0	0	0		0	0	0		0	0	0		0	0	0		0	0
54623	PAF1	35		0	0	0		0	0	0	R	1	1	0.00631209		0	0	0		0	0	0		0	0	0		0	0	0	S	0.00919622	2	2	S	3	3	0.0281495	S	2	2	0.00908342	S	4	5	0.0973313	S	4	6
6231	RPS26	6		0	0	0		0	0	0	A	1	1	0.00805746		0	0	0		0	0	0		0	0	0		0	0	0	R	0.00634075	1	1	S	1	1	0.0300353	S	1	1	0.0171074		0	0	0	S	1	1
6158	RPL28	9.66667		0	0	0		0	0	0	S	1	1			0	0	0		0	0	0		0	0	0		0	0	0	R	0.00596764	1	1	S	1	1	0.00676272	S	2	2	0.00800982		0	0	0	R	1	1
78988	MRPL57	6		0	0	0		0	0	0	S	1	1	0.0447417		0	0	0		0	0	0		0	0	0		0	0	0	R	0.0137796	1	1		0	0	0	S	1	1	0.0754281		0	0	0		0	0
58497	PRUNE1	19.3333		0	0	0		0	0	0	A	1	1	0.00424522		0	0	0		0	0	0		0	0	0		0	0	0	A	0.00866404	1	1		0	0	0		0	0	0	S	1	1	0.0066881	S	2	2
8570	KHSRP	41.25		0	0	0		0	0	0	S	1	1	0.00412409		0	0	0		0	0	0		0	0	0		0	0	0		0	0	0	S	7	7	0.0881302	S	5	5	0.0379317	S	4	4	0.0207465	S	5	5
1938	EEF2	54		0	0	0		0	0	0	R	1	1	0.00853044		0	0	0		0	0	0		0	0	0		0	0	0		0	0	0	S	10	11	0.466269	S	2	2	0.0162521	S	1	1	0.0166312	S	9	10
64783	RBM15	61		0	0	0		0	0	0	S	1	1	0.0070508		0	0	0		0	0	0		0	0	0		0	0	0		0	0	0	S	3	3	0.0233779	S	3	3	0.0217298	S	4	4	0.0400697	S	9	9
2023	ENO1	26.6667		0	0	0		0	0	0	S	6	8	0.11239		0	0	0		0	0	0		0	0	0		0	0	0		0	0	0	S	7	8	0.183845	S	5	5	0.0565047		0	0	0		0	0
192111	PGAM5	21.3333		0	0	0		0	0	0	S	1	1	0.00304845		0	0	0		0	0	0		0	0	0		0	0	0		0	0	0	S	1	1	0.0104938	S	1	1	0.00720376		0	0	0		0	0
84289	ING5	9.71429		0	0	0		0	0	0	S	1	1	0.00391552		0	0	0		0	0	0		0	0	0		0	0	0		0	0	0	S	1	1	0.00569534	S	1	1	0.00260225		0	0	0	A	1	1
2665	GDI2	29		0	0	0		0	0	0	R	1	1	0.00720307		0	0	0		0	0	0		0	0	0		0	0	0		0	0	0	S	3	3	0.0457984	S	1	1	0.0147034		0	0	0		0	0
89887	ZNF628	52		0	0	0		0	0	0	A	1	1	0.071545		0	0	0		0	0	0		0	0	0		0	0	0		0	0	0	S	1	1	0.0245078		0	0	0	S	1	1	0.025583	A	1	1
83855	KLF16	14		0	0	0		0	0	0	R	1	1	0.0091319		0	0	0		0	0	0		0	0	0		0	0	0		0	0	0	S	1	1	0.0241935		0	0	0	S	1	1	0.0231922	R	1	1
90780	PYGO2	17		0	0	0		0	0	0	R	1	1	0.00194418		0	0	0		0	0	0		0	0	0		0	0	0		0	0	0	S	1	1	0.00922354		0	0	0	S	1	1	0.0138201	R	1	1
5529	PPP2R5E	20		0	0	0		0	0	0	R	1	1	0.0264815		0	0	0		0	0	0		0	0	0		0	0	0		0	0	0	S	1	1	0.0297744		0	0	0		0	0	0	A	1	1
5687	PSMA6	14		0	0	0		0	0	0	S	1	1	0.00498506		0	0	0		0	0	0		0	0	0		0	0	0		0	0	0	S	1	1	0.00736604		0	0	0		0	0	0	S	1	2
5315	PKM	40		0	0	0		0	0	0	S	1	1	0.0138553		0	0	0		0	0	0		0	0	0		0	0	0		0	0	0	S	2	2	0.0214785		0	0	0		0	0	0	S	1	1
307	ANXA4	22.3333		0	0	0		0	0	0	A	1	1	0.00262449		0	0	0		0	0	0		0	0	0		0	0	0		0	0	0	S	1	1	0.003828		0	0	0		0	0	0		0	0
54984	PINX1	11		0	0	0		0	0	0	A	2	2	0.00792993		0	0	0		0	0	0		0	0	0		0	0	0		0	0	0		0	0	0	S	2	2	0.0163071	S	2	2	0.0217575	S	1	1
23550	PSD4	54.5		0	0	0		0	0	0	A	1	1	0.00754095		0	0	0		0	0	0		0	0	0		0	0	0		0	0	0		0	0	0	S	1	1	0.0118303		0	0	0		0	0
1050	CEBPA	17.5		0	0	0		0	0	0	A	1	1	0.0047735		0	0	0		0	0	0		0	0	0		0	0	0		0	0	0		0	0	0		0	0	0	S	1	1	0.00526837		0	0
57636	ARHGAP23	88.0909		0	0	0		0	0	0	A	1	1	0.00203374		0	0	0		0	0	0		0	0	0		0	0	0		0	0	0		0	0	0		0	0	0	S	1	1	0.00292164		0	0
161424	NOP9	34.8		0	0	0		0	0	0	A	1	2	0.0671061		0	0	0		0	0	0		0	0	0		0	0	0		0	0	0		0	0	0		0	0	0	S	1	1	0.00681447	S	4	4
8437	RASAL1	49.25		0	0	0		0	0	0	R	1	1			0	0	0		0	0	0		0	0	0		0	0	0		0	0	0		0	0	0		0	0	0	S	1	1	0.00347498		0	0
29911	HOOK2	46.1429		0	0	0		0	0	0	A	1	1	0.00071592		0	0	0		0	0	0		0	0	0		0	0	0		0	0	0		0	0	0		0	0	0	S	1	1	0.00634231	S	4	5
6251	RSU1	15.6667		0	0	0		0	0	0	A	1	1	0.092788		0	0	0		0	0	0		0	0	0		0	0	0		0	0	0		0	0	0		0	0	0	S	1	1	0.00709231	A	1	1
10166	SLC25A15	19		0	0	0		0	0	0	A	1	1	0.0247003		0	0	0		0	0	0		0	0	0		0	0	0		0	0	0		0	0	0		0	0	0	S	1	1	0.0412722		0	0
474	ATOH1	21		0	0	0		0	0	0	R	1	2	0.189643		0	0	0		0	0	0		0	0	0		0	0	0		0	0	0		0	0	0		0	0	0	S	1	1	0.00718743		0	0
57678	GPAM	47		0	0	0		0	0	0	A	1	1	0.0075891		0	0	0		0	0	0		0	0	0		0	0	0		0	0	0		0	0	0		0	0	0	S	1	1	0.00389478		0	0
2305	FOXM1	31.8333		0	0	0		0	0	0	S	1	1	0.00469724		0	0	0		0	0	0		0	0	0		0	0	0		0	0	0		0	0	0		0	0	0		0	0	0		0	0
1499	CTNNB1	45.6667		0	0	0		0	0	0	S	3	3	0.0626781		0	0	0		0	0	0		0	0	0		0	0	0		0	0	0		0	0	0		0	0	0		0	0	0	S	4	5
10626	TRIM16	28.75		0	0	0		0	0	0	R	1	1	0.0228639		0	0	0		0	0	0		0	0	0		0	0	0		0	0	0		0	0	0		0	0	0		0	0	0	S	3	3
23310	NCAPD3	82.5		0	0	0		0	0	0	R	1	1	0.0130073		0	0	0		0	0	0		0	0	0		0	0	0		0	0	0		0	0	0		0	0	0		0	0	0	S	2	2
25759	SHC2	32.6		0	0	0		0	0	0	A	1	1	0.00568337		0	0	0		0	0	0		0	0	0		0	0	0		0	0	0		0	0	0		0	0	0		0	0	0	A	1	2
5317	PKP1	54.5		0	0	0		0	0	0	S	11	13	0.242215		0	0	0		0	0	0		0	0	0		0	0	0		0	0	0		0	0	0		0	0	0		0	0	0		0	0
1041	CDSN	22		0	0	0		0	0	0	S	3	4	0.129114		0	0	0		0	0	0		0	0	0		0	0	0		0	0	0		0	0	0		0	0	0		0	0	0		0	0
2934	GSN	39.75		0	0	0		0	0	0	S	2	2	0.00918019		0	0	0		0	0	0		0	0	0		0	0	0		0	0	0		0	0	0		0	0	0		0	0	0		0	0
5268	SERPINB5	17		0	0	0		0	0	0	S	1	1	0.0133753		0	0	0		0	0	0		0	0	0		0	0	0		0	0	0		0	0	0		0	0	0		0	0	0		0	0
7053	TGM3	44		0	0	0		0	0	0	S	1	1	0.000870442		0	0	0		0	0	0		0	0	0		0	0	0		0	0	0		0	0	0		0	0	0		0	0	0		0	0
9333	TGM5	31		0	0	0		0	0	0	S	1	1	0.00595176		0	0	0		0	0	0		0	0	0		0	0	0		0	0	0		0	0	0		0	0	0		0	0	0		0	0
11272	PRR4	6.5		0	0	0		0	0	0	S	1	1	0.00995882		0	0	0		0	0	0		0	0	0		0	0	0		0	0	0		0	0	0		0	0	0		0	0	0		0	0
124739	USP43	57.8333		0	0	0		0	0	0	S	1	1	0.00594875		0	0	0		0	0	0		0	0	0		0	0	0		0	0	0		0	0	0		0	0	0		0	0	0		0	0
374897	SBSN	13.3333		0	0	0		0	0	0	S	3	3	0.00411308		0	0	0		0	0	0		0	0	0		0	0	0		0	0	0		0	0	0		0	0	0		0	0	0		0	0
4332	MNDA	30		0	0	0		0	0	0	S	1	1	0.0113927		0	0	0		0	0	0		0	0	0		0	0	0		0	0	0		0	0	0		0	0	0		0	0	0		0	0
8525	DGKZ	43.087		0	0	0		0	0	0	S	1	1			0	0	0		0	0	0		0	0	0		0	0	0		0	0	0		0	0	0		0	0	0		0	0	0		0	0
23650	TRIM29	27.4		0	0	0		0	0	0	S	2	2	0.0129524		0	0	0		0	0	0		0	0	0		0	0	0		0	0	0		0	0	0		0	0	0		0	0	0		0	0
718	C3	110		0	0	0		0	0	0	S	1	1	0.00352892		0	0	0		0	0	0		0	0	0		0	0	0		0	0	0		0	0	0		0	0	0		0	0	0		0	0
5914	RARA	22		0	0	0		0	0	0	S	1	1	0.00518314		0	0	0	A	1	1	0.00517973		0	0	0	R	1	1	0.00556093		0	0	0		0	0	0		0	0	0		0	0	0		0	0
5868	RAB5A	14		0	0	0		0	0	0	R	1	1	0.00369014		0	0	0	S	1	1	0.00297672		0	0	0		0	0	0		0	0	0	S	1	1	0.00597925		0	0	0	S	1	1	0.00344923	A	1	4
5869	RAB5B	12.5		0	0	0		0	0	0	R	1	1	0.00369014		0	0	0	S	1	1	0.00297672		0	0	0		0	0	0		0	0	0	S	1	1	0.00597925		0	0	0	S	1	1	0.00344923		0	0
5878	RAB5C	15		0	0	0		0	0	0	R	1	1	0.00369014		0	0	0	S	1	1	0.00297672		0	0	0		0	0	0		0	0	0	S	1	1	0.00597925		0	0	0	S	1	1	0.00344923		0	0
5916	RARG	23		0	0	0		0	0	0	S	1	1	0.00518314		0	0	0		0	0	0	A	1	1	0.00238842	R	1	1	0.00556093		0	0	0		0	0	0		0	0	0		0	0	0		0	0
4831	NME2	11		0	0	0		0	0	0	A	1	1	0.000879877	R	1	1	0.00144547		0	0	0		0	0	0	A	1	1	0.00190101		0	0	0	S	3	4	0.0627768	S	1	1	0.00725906	S	1	1	0.00414915	S	3	3
654364	NME1-NME2	19		0	0	0		0	0	0	A	1	1	0.000879877	R	1	1	0.00144547		0	0	0		0	0	0	A	1	1	0.00190101		0	0	0	S	3	4	0.0627768	S	1	1	0.00725906	S	1	1	0.00414915	S	3	3
4830	NME1	12		0	0	0		0	0	0	A	1	1	0.000879877	R	1	1	0.00144547		0	0	0		0	0	0	A	1	1	0.00190101		0	0	0	A	2	3	0	S	1	1	0.00725906	S	1	1	0.00414915	A	2	2
3039	HBA1	8		0	0	0		0	0	0	S	3	4	0.017684	R	1	1	0.00137568		0	0	0		0	0	0		0	0	0		0	0	0		0	0	0		0	0	0		0	0	0	A	1	1
3040	HBA2	8		0	0	0		0	0	0	S	3	4	0.017684	R	1	1	0.00137568		0	0	0		0	0	0		0	0	0		0	0	0		0	0	0		0	0	0		0	0	0	A	1	1
1761	DMRT1	13.9		0	0	0		0	0	0	S	1	1	0.00281585		0	0	0		0	0	0		0	0	0	R	1	2	0.00424505		0	0	0		0	0	0		0	0	0		0	0	0		0	0
10655	DMRT2	23		0	0	0		0	0	0	S	1	1	0.00281585		0	0	0		0	0	0		0	0	0	R	1	2	0.00424505		0	0	0		0	0	0		0	0	0		0	0	0		0	0
58524	DMRT3	33		0	0	0		0	0	0	S	1	1	0.00281585		0	0	0		0	0	0		0	0	0	R	1	2	0.00424505		0	0	0		0	0	0		0	0	0		0	0	0		0	0
63950	DMRTA2	29		0	0	0		0	0	0	S	1	1	0.00281585		0	0	0		0	0	0		0	0	0	R	1	2	0.00424505		0	0	0		0	0	0		0	0	0		0	0	0		0	0
63951	DMRTA1	35		0	0	0		0	0	0	S	1	1	0.00281585		0	0	0		0	0	0		0	0	0	R	1	2	0.00424505		0	0	0		0	0	0		0	0	0		0	0	0		0	0
5915	RARB	19.8333		0	0	0		0	0	0	S	1	1	0.00518314		0	0	0		0	0	0		0	0	0	R	1	1	0.00556093		0	0	0		0	0	0		0	0	0		0	0	0		0	0
6317	SERPINB3	24		0	0	0		0	0	0	S	2	2	0.010738		0	0	0		0	0	0		0	0	0		0	0	0		0	0	0		0	0	0		0	0	0		0	0	0		0	0
6318	SERPINB4	23		0	0	0		0	0	0	S	2	2	0.010738		0	0	0		0	0	0		0	0	0		0	0	0		0	0	0		0	0	0		0	0	0		0	0	0		0	0
140564	APOBEC3D	19		0	0	0		0	0	0	A	1	1	0	A	1	1	0.00203152	S	1	1	0.00466235	A	1	1	0	A	1	1	0	A	0	1	1		0	0	0		0	0	0		0	0	0		0	0
7775	ZNF232	27.6667		0	0	0		0	0	0	A	1	1	0	S	2	2	0.00959222	A	1	1	0	A	1	1	0	A	1	1	0	A	0	1	1		0	0	0		0	0	0		0	0	0		0	0
54915	YTHDF1	26		0	0	0		0	0	0	A	1	1	0	R	3	3	0.00686731		0	0	0	S	2	2	0.00871212	A	3	3	0.0059452	S	0.00420003	2	2	S	1	1	0.0132027	S	2	2	0.0138303	S	5	5	0.0128181	R	2	2
162	AP1B1	52.3333		0	0	0		0	0	0	A	1	1	0	R	2	2	0.00145212		0	0	0	A	1	1	0	A	1	1	0	A	0	1	1	A	2	2	0		0	0	0	A	4	5	0	S	9	12
8242	KDM5C	91.5		0	0	0		0	0	0	A	1	1	0		0	0	0		0	0	0		0	0	0	A	1	1	0	A	0	1	1	A	1	1	0	A	1	1	0	A	1	1	0	S	2	2
51168	MYO15A	157.714		0	0	0		0	0	0		0	0	0	S	1	1	0.0074548	S	1	1	0.00991198	S	1	1	0.0111788	S	1	1	0.00990389	R	0.0112581	1	1	S	1	1	0.0370843	S	1	1	0.0230101	S	1	1	0.0347881	S	1	1
6144	RPL21	8		0	0	0		0	0	0		0	0	0	R	1	1	0.00428039	R	1	1	0.00795983	R	1	1	0.00743158	R	1	1	0.00635481	R	0.00692612	1	1	S	1	1	0.0450214	S	1	1	0.0277751	S	1	1	0.0378235	S	2	3
3756	KCNH1	50.6667		0	0	0		0	0	0		0	0	0	S	2	2	0.0267589	A	1	1	0.0067661	A	1	1	0.0114203	S	1	1	0.00497355	S	0.00601972	1	1		0	0	0		0	0	0		0	0	0		0	0
10576	CCT2	34		0	0	0		0	0	0		0	0	0	S	2	2	0.00976674	S	5	5	0.0303896	A	1	1	0.000594971		0	0	0	S	0.118293	10	10	S	32	69	3.59888	S	9	9	0.110186	S	43	138	18.2372	S	43	185
23522	KAT6B	99		0	0	0		0	0	0		0	0	0		0	0	0	R	1	1	0.0039913	A	1	1	0.0026245	S	1	1	0.00338085	S	0.00214995	1	1		0	0	0		0	0	0		0	0	0		0	0
4133	MAP2	80.5385		0	0	0		0	0	0		0	0	0		0	0	0	A	1	1	0.0039325	A	1	1	0.00367468	A	1	1	0.00680546	S	0.00599092	1	1		0	0	0		0	0	0		0	0	0		0	0
7259	TSPYL1	28		0	0	0		0	0	0		0	0	0		0	0	0	S	1	1	0.00315702	S	1	1	0.00268835	R	1	1	0.00353214		0	0	0	S	2	2	0.0322677	S	1	1	0.00802545	S	6	7	0.110969	S	9	9
115330	GPR146	15.5		0	0	0		0	0	0		0	0	0		0	0	0	R	1	1	0.00910633	S	1	1	0.00877559		0	0	0	R	0.00703748	1	1		0	0	0		0	0	0		0	0	0		0	0
369	ARAF	32.6		0	0	0		0	0	0		0	0	0		0	0	0	A	1	1	0.00132045	R	1	1	0.00243368		0	0	0		0	0	0	S	2	2	0.0101247	S	2	2	0.0179732	S	1	1	0.0163343	S	4	4
498	ATP5F1A	36.75		0	0	0		0	0	0		0	0	0		0	0	0	R	1	1	0.0024847	R	1	1	0.00392633		0	0	0		0	0	0	S	1	1	0.010419	S	2	2	0.0136857	S	1	1	0.0129632	S	3	3
51504	TRMT112	8.66667		0	0	0		0	0	0		0	0	0		0	0	0	S	1	1	0.00174039	R	1	1	0.00319057		0	0	0		0	0	0	S	1	1	0.0089278		0	0	0		0	0	0	S	2	2
10294	DNAJA2	25		0	0	0		0	0	0		0	0	0		0	0	0	R	1	1	0.0127037	R	1	1	0.00524714		0	0	0		0	0	0	S	1	1			0	0	0		0	0	0	S	2	2
10772	SRSF10	5.88889		0	0	0		0	0	0		0	0	0		0	0	0	S	1	1	0.00252678	A	1	1	0.00306767		0	0	0		0	0	0		0	0	0		0	0	0		0	0	0	S	1	1
7755	ZNF205	41		0	0	0		0	0	0		0	0	0	S	1	1	0.00612304	R	1	1	0.00769801		0	0	0	S	1	1	0.0116203	S	0.00944704	1	1		0	0	0		0	0	0		0	0	0		0	0
2306	FOXD2	18		0	0	0		0	0	0		0	0	0	R	1	1	0.000734289	S	1	1	0.000734415		0	0	0	A	1	1	0.000782323		0	0	0	S	1	1	0.000865336		0	0	0		0	0	0		0	0
372	ARCN1	27.6667		0	0	0		0	0	0		0	0	0	R	1	1	0.00222773	S	2	2	0.0103323		0	0	0		0	0	0	S	0.0225	5	5	S	7	8	0.102504	S	2	2	0.0109515	S	14	17	0.662136	S	21	45
10575	CCT4	36.5		0	0	0		0	0	0		0	0	0	S	2	2	0.0091623	R	1	1	0.00309704		0	0	0		0	0	0	S	0.0165684	2	2	S	14	17	0.397265	S	1	2	0.0100584	S	25	51	4.17547	S	33	105
23019	CNOT1	128.333		0	0	0		0	0	0		0	0	0	S	12	12	0.0676533	S	2	2	0.00626503		0	0	0		0	0	0	S	0.342299	30	29	S	21	26	0.382715		0	0	0	S	53	90	3.03211	S	68	121
4848	CNOT2	24.25		0	0	0		0	0	0		0	0	0	S	1	1	0.00562414	S	2	2	0.0178505		0	0	0		0	0	0	S	0.0366668	3	3	S	5	6	0.0793785		0	0	0	S	11	16	0.472927	S	14	19
9125	CNOT9	18.1667		0	0	0		0	0	0		0	0	0	S	1	1	0.00207048	S	1	1			0	0	0		0	0	0	S	0.0444481	2	2	S	7	8	0.191358		0	0	0	S	9	18	0.787065	S	12	20
23779	ARHGAP8	28.3333		0	0	0		0	0	0		0	0	0	S	1	1	0.00307545	S	3	4	0.0210503		0	0	0		0	0	0	S	0.028576	3	3	S	4	4	0.0660207		0	0	0	S	8	15	0.633307	S	16	35
10652	YKT6	12.6667		0	0	0		0	0	0		0	0	0	S	1	1	0.00285436	S	1	1	0.00826361		0	0	0		0	0	0	S	0.0186586	2	2	S	1	1	0.012763		0	0	0	S	5	7	0.173609	S	12	23
55227	LRRC1	25		0	0	0		0	0	0		0	0	0	A	1	1	0.00886785	S	1	1	0.00989154		0	0	0		0	0	0	S	0.00585104	3	3	S	2	2	0.0277563		0	0	0	S	7	12	0.367534	S	13	26
7514	XPO1	57.2		0	0	0		0	0	0		0	0	0	R	1	1	0.0027794	A	1	1	0.00565775		0	0	0		0	0	0	S	0.0483252	8	8	S	1	1	0.0111083		0	0	0	S	17	23	0.494755	S	34	74
8819	SAP30	10		0	0	0		0	0	0		0	0	0	S	1	1	0.0108127	R	1	1	0.0153467		0	0	0		0	0	0		0	0	0	S	1	1	0.0245281	S	1	1	0.0107111	S	1	1	0.020349	S	1	1
6133	RPL9	11.5		0	0	0		0	0	0		0	0	0		0	0	0	S	2	2	0.00461418		0	0	0	R	1	1	0.00452078	R	0.00204198	1	1	S	3	3	0.0190356	S	2	2	0.0146973	S	3	3	0.0288721	S	3	3
6128	RPL6	15.5		0	0	0		0	0	0		0	0	0		0	0	0	S	1	1	0.00520674		0	0	0	R	1	1	0.00859067		0	0	0	S	1	1	0.0105345	S	1	1	0.00629093	S	2	2	0.0196299	S	1	1
8079	MLF2	12		0	0	0		0	0	0		0	0	0		0	0	0	A	1	1	0.00933263		0	0	0	A	1	1			0	0	0	S	1	1	0.00272307		0	0	0		0	0	0	S	1	1
54954	FAM120C	39.75		0	0	0		0	0	0		0	0	0		0	0	0	A	1	1	0.00526059		0	0	0	R	1	1	0.0170401		0	0	0		0	0	0	S	1	1	0.00118907		0	0	0		0	0
6923	ELOB	11		0	0	0		0	0	0		0	0	0		0	0	0	A	1	1	0.0072031		0	0	0		0	0	0	A	0.00705155	1	1	S	3	4	0.0598004	S	2	3	0.021391	S	2	2	0.021423	S	5	7
6224	RPS20	6.5		0	0	0		0	0	0		0	0	0		0	0	0	R	1	1	0.000550141		0	0	0		0	0	0	R	0.00625465	1	1	S	1	1	0.0292066	S	1	1	0.0117927	S	1	1	0.0303866	S	2	2
8416	ANXA9	23		0	0	0		0	0	0		0	0	0		0	0	0	S	10	10	0.0708927		0	0	0		0	0	0	S	0.0517093	6	6	S	11	16	0.350801		0	0	0	S	15	29	1.80415	S	14	26
29883	CNOT7	10.8333		0	0	0		0	0	0		0	0	0		0	0	0	S	1	1	0.00310586		0	0	0		0	0	0	S	0.0334979	3	3	S	3	4	0.0664074		0	0	0	S	4	5	0.30344	S	6	13
22818	COPZ1	6.5		0	0	0		0	0	0		0	0	0		0	0	0	S	1	1	0.00677173		0	0	0		0	0	0	S	0.0239739	2	2	S	4	7	0.10174		0	0	0	S	5	7	0.353152	S	8	13
871	SERPINH1	26		0	0	0		0	0	0		0	0	0		0	0	0	R	1	1	0.00372448		0	0	0		0	0	0	S	0.0108433	2	2	S	2	2	0.0218407		0	0	0	S	6	6	0.101446	S	8	10
54832	VPS13C	212.167		0	0	0		0	0	0		0	0	0		0	0	0	S	1	1	0.00279662		0	0	0		0	0	0	S	0.0191527	5	5	S	1	1	0.00120936		0	0	0	S	1	1	0.00379531	S	2	2
9319	TRIP13	21		0	0	0		0	0	0		0	0	0		0	0	0	S	2	2	0.00658033		0	0	0		0	0	0	S	0.00343205	1	1		0	0	0		0	0	0	S	13	15	0.437774	S	18	27
57727	NCOA5	23.2		0	0	0		0	0	0		0	0	0		0	0	0	A	1	1	0.000569399		0	0	0		0	0	0	S	0.480416	1	1		0	0	0		0	0	0		0	0	0		0	0
54433	GAR1	13		0	0	0		0	0	0		0	0	0		0	0	0	S	1	1	0.00242922		0	0	0		0	0	0		0	0	0	S	5	9	0.412568	S	6	9	0.271148	S	5	9	0.335322	S	5	8
51406	NOL7	11		0	0	0		0	0	0		0	0	0		0	0	0	S	1	1	0.00319161		0	0	0		0	0	0		0	0	0	S	3	3	0.0281825	S	1	1	0.0105737	S	4	4	0.0436219	S	4	4
467	ATF3	10		0	0	0		0	0	0		0	0	0		0	0	0	S	1	1	0.00305624		0	0	0		0	0	0		0	0	0	S	1	1	0.00165979	S	1	1	0.00144387	S	1	1	0.0249404		0	0
92906	HNRNPLL	32		0	0	0		0	0	0		0	0	0		0	0	0	A	1	1	0.00341906		0	0	0		0	0	0		0	0	0	S	2	2	0.0084951	S	1	1	0.00404991	S	8	10	0.237506	S	13	31
55957	LIN37	13		0	0	0		0	0	0		0	0	0		0	0	0	S	1	1	0.00669534		0	0	0		0	0	0		0	0	0	S	1	2	0.00725525	S	1	1	0.00196198	S	1	1	0.0132276	S	1	1
84836	ABHD14B	11.5		0	0	0		0	0	0		0	0	0		0	0	0	S	1	1	0.00135918		0	0	0		0	0	0		0	0	0	S	1	1	0.00235673		0	0	0	S	6	6	0.0808378	S	7	13
63897	HEATR6	53.8		0	0	0		0	0	0		0	0	0		0	0	0	R	1	1	0.00177281		0	0	0		0	0	0		0	0	0	S	1	1	0.00167501		0	0	0	S	9	12	0.203486	S	19	44
24149	ZNF318	134.5		0	0	0		0	0	0		0	0	0		0	0	0	A	1	1	0.0046035		0	0	0		0	0	0		0	0	0	S	2	2	0.00740199		0	0	0	S	6	6	0.0653587	S	11	14
26151	NAT9	9.05556		0	0	0		0	0	0		0	0	0		0	0	0	R	1	1	0.00780304		0	0	0		0	0	0		0	0	0	S	1	1	0.0195048		0	0	0	S	1	1	0.0175127	R	1	1
54993	ZSCAN2	22.8571		0	0	0		0	0	0		0	0	0		0	0	0	A	1	1	0.000486956		0	0	0		0	0	0		0	0	0	S	1	1	0.0158322		0	0	0		0	0	0	S	1	2
1936	EEF1D	26		0	0	0		0	0	0		0	0	0		0	0	0	A	1	1	0.00164991		0	0	0		0	0	0		0	0	0	S	1	1	0.0117187		0	0	0		0	0	0	S	1	1
2821	GPI	38.8		0	0	0		0	0	0		0	0	0		0	0	0	R	1	1	0.004034		0	0	0		0	0	0		0	0	0	S	2	2	0.0193264		0	0	0		0	0	0		0	0
1937	EEF1G	27		0	0	0		0	0	0		0	0	0		0	0	0	A	1	1	0.00188816		0	0	0		0	0	0		0	0	0		0	0	0	S	2	2	0.0131583	S	1	1	0.00487674	S	1	1
2020	EN2	18		0	0	0		0	0	0		0	0	0		0	0	0	R	1	1	0.00608034		0	0	0		0	0	0		0	0	0		0	0	0	S	1	1	0.00913396	S	1	1	0.00571164		0	0
140894	CNBD2	33.2222		0	0	0		0	0	0		0	0	0		0	0	0	R	1	1	0.00698056		0	0	0		0	0	0		0	0	0		0	0	0	S	1	1	0.0230886		0	0	0		0	0
8894	EIF2S2	16.5		0	0	0		0	0	0		0	0	0		0	0	0	R	1	1	0.00273034		0	0	0		0	0	0		0	0	0		0	0	0	S	1	1	0.00405379		0	0	0	S	1	1
3036	HAS1	34.3333		0	0	0		0	0	0		0	0	0		0	0	0	S	1	1	0.00723647		0	0	0		0	0	0		0	0	0		0	0	0		0	0	0	S	1	2	0.967298	S	1	2
8036	SHOC2	28.5		0	0	0		0	0	0		0	0	0		0	0	0	S	1	1	0.00362919		0	0	0		0	0	0		0	0	0		0	0	0		0	0	0	S	3	3	0.0538047	S	8	10
10125	RASGRP1	47		0	0	0		0	0	0		0	0	0		0	0	0	A	1	1	0.0614144		0	0	0		0	0	0		0	0	0		0	0	0		0	0	0	S	1	1	0.0723099	R	1	1
23354	HAUS5	38.5		0	0	0		0	0	0		0	0	0		0	0	0	A	1	1	0.00931038		0	0	0		0	0	0		0	0	0		0	0	0		0	0	0	S	1	1	0.00315348	S	2	2
440730	TRIM67	46		0	0	0		0	0	0		0	0	0		0	0	0	A	1	1	0.00104801		0	0	0		0	0	0		0	0	0		0	0	0		0	0	0	S	1	1	0.00464712		0	0
170394	PWWP2B	32		0	0	0		0	0	0		0	0	0		0	0	0	S	1	1	0.00107925		0	0	0		0	0	0		0	0	0		0	0	0		0	0	0	S	1	1	0.00395874		0	0
9443	MED7	16		0	0	0		0	0	0		0	0	0		0	0	0	R	1	1	0.0145582		0	0	0		0	0	0		0	0	0		0	0	0		0	0	0	S	1	1	0.00862222		0	0
79144	PPDPF	4		0	0	0		0	0	0		0	0	0		0	0	0	R	1	1	0.00194647		0	0	0		0	0	0		0	0	0		0	0	0		0	0	0	S	1	1	0.00235202		0	0
55810	FOXJ2	21.6667		0	0	0		0	0	0		0	0	0		0	0	0	A	1	1			0	0	0		0	0	0		0	0	0		0	0	0		0	0	0		0	0	0	S	1	1
5955	RCN2	18.5		0	0	0		0	0	0		0	0	0		0	0	0	S	1	1	0.00490741		0	0	0		0	0	0		0	0	0		0	0	0		0	0	0		0	0	0	S	1	1
57580	PREX1	95		0	0	0		0	0	0		0	0	0		0	0	0	A	1	1	0.00879373		0	0	0		0	0	0		0	0	0		0	0	0		0	0	0		0	0	0	S	3	3
27095	TRAPPC3	8.5		0	0	0		0	0	0		0	0	0		0	0	0	A	1	1	0.00760784		0	0	0		0	0	0		0	0	0		0	0	0		0	0	0		0	0	0	S	2	2
85477	SCIN	36.3333		0	0	0		0	0	0		0	0	0		0	0	0	S	1	1	0.000885322		0	0	0		0	0	0		0	0	0		0	0	0		0	0	0		0	0	0		0	0
390084	OR56A5	14		0	0	0		0	0	0		0	0	0		0	0	0	S	1	2	0.013987		0	0	0		0	0	0		0	0	0		0	0	0		0	0	0		0	0	0		0	0
10049	DNAJB6	13.8		0	0	0		0	0	0		0	0	0		0	0	0	S	1	1	0.0030885		0	0	0		0	0	0		0	0	0	S	1	1	0.0071771	S	1	1	0.00501073	S	2	2	0.0256337	S	2	2
414061	DNAJB3	8		0	0	0		0	0	0		0	0	0		0	0	0	S	1	1	0.0030885		0	0	0		0	0	0		0	0	0	S	1	1	0.0071771	S	1	1	0.00501073	A	1	1	0	A	1	1
10093	ARPC4	11.3333		0	0	0		0	0	0		0	0	0		0	0	0	R	1	1	0.00211933		0	0	0		0	0	0		0	0	0	S	1	1	0.002571		0	0	0	S	1	1	0.00326022	S	2	2
100526693	ARPC4-TTLL3	38		0	0	0		0	0	0		0	0	0		0	0	0	R	1	1	0.00211933		0	0	0		0	0	0		0	0	0	S	1	1	0.002571		0	0	0	S	1	1	0.00326022	S	2	2
2782	GNB1	12.5		0	0	0		0	0	0		0	0	0		0	0	0	S	1	1	0.000827413		0	0	0		0	0	0		0	0	0		0	0	0		0	0	0		0	0	0		0	0
2784	GNB3	16.6667		0	0	0		0	0	0		0	0	0		0	0	0	S	1	1	0.000827413		0	0	0		0	0	0		0	0	0		0	0	0		0	0	0		0	0	0		0	0
79005	SCNM1	13		0	0	0		0	0	0		0	0	0		0	0	0	S	1	1	0.00127221		0	0	0		0	0	0		0	0	0		0	0	0		0	0	0		0	0	0		0	0
100534012	TNFAIP8L2-SCNM1	12		0	0	0		0	0	0		0	0	0		0	0	0	S	1	1	0.00127221		0	0	0		0	0	0		0	0	0		0	0	0		0	0	0		0	0	0		0	0
124961	ZFP3	39		0	0	0		0	0	0		0	0	0	S	1	1	0.00478148		0	0	0	R	1	1	0.0015398	S	1	1	0.00517956	R	0.00475165	1	1	S	1	1		S	1	1		S	3	3	0.0260719	S	3	3
7690	ZNF131	29.2		0	0	0		0	0	0		0	0	0	S	1	1	0.00072159		0	0	0	A	1	1	0.00409351	S	1	1	0.00414391	S	0.00730082	2	2	S	1	1	0.00524117	S	2	2	0.0137886	S	1	1	0.00851698		0	0
29110	TBK1	48		0	0	0		0	0	0		0	0	0	R	1	1	0.00835722		0	0	0	A	1	1	0.01232	A	1	1	0.0131602	A	0.012011	1	1	S	1	1	0.00567216		0	0	0	S	3	3	0.0386678	S	4	4
9739	SETD1A	89		0	0	0		0	0	0		0	0	0	A	2	2	0.00653757		0	0	0	R	1	1	0.00105614	A	1	1	0.00322785	S	0.0126685	3	3		0	0	0		0	0	0	S	4	4	0.0239119	S	8	10
5965	RECQL	40		0	0	0		0	0	0		0	0	0	S	1	1	0.00584332		0	0	0	S	1	1	0.0042663	S	1	1	0.00489499	S	0.0072433	1	1		0	0	0		0	0	0		0	0	0		0	0
2194	FASN	148		0	0	0		0	0	0		0	0	0	A	1	1	0.0096269		0	0	0	A	1	1	0.00683098	A	1	1	0.00174722	S	0.000952902	1	1		0	0	0		0	0	0		0	0	0	S	10	11
51078	THAP4	27.8		0	0	0		0	0	0		0	0	0	R	1	1	0.00336695		0	0	0	S	1	1	0.00508256	R	1	1	0.00454388		0	0	0	S	1	1	0.00179546	S	1	1	0.00113912	S	1	1	0.00219069		0	0
4292	MLH1	43.3		0	0	0		0	0	0		0	0	0	S	1	1	0.00342283		0	0	0	S	1	1	0.00241229		0	0	0	S	0.00297086	2	2	S	5	5	0.0748814		0	0	0	S	18	22	0.57252	S	23	37
9585	KIF20B	124.5		0	0	0		0	0	0		0	0	0	A	1	1	0.000421928		0	0	0	A	1	1	0.0024392		0	0	0	S	0.00244358	1	1	S	1	1	0.00251104		0	0	0	S	6	7	0.052911	S	4	4
11276	SYNRG	74.4737		0	0	0		0	0	0		0	0	0	A	2	3	0.0175657		0	0	0	A	1	1	0.0040671		0	0	0	A	0.0194473	1	1		0	0	0		0	0	0		0	0	0	S	8	8
9967	THRAP3	52.3333		0	0	0		0	0	0		0	0	0	S	1	1	0.00288733		0	0	0	S	2	2	0.00568153		0	0	0		0	0	0	S	1	1	0.00571049	S	1	1	0.00493179	S	3	3	0.0233068	S	3	3
10291	SF3A1	48		0	0	0		0	0	0		0	0	0		0	0	0		0	0	0	A	1	1	0.00182985	A	1	1	0.00309594	S		1	1	S	1	1	0.00512148		0	0	0	S	1	1	0.00526522	S	2	2
27127	SMC1B	76.25		0	0	0		0	0	0		0	0	0		0	0	0		0	0	0	S	1	1	0.00913894	R	1	1	0.00710454		0	0	0	S	1	1	0.00217523	S	1	1	0.00115437		0	0	0		0	0
90102	PHLDB2	72.6667		0	0	0		0	0	0		0	0	0		0	0	0		0	0	0	R	1	1	0.100627	R	1	1	0.116288		0	0	0	S	1	1	0.0623629		0	0	0	S	1	1	0.0333896		0	0
90627	STARD13	54.5714		0	0	0		0	0	0		0	0	0		0	0	0		0	0	0	R	1	1	0.00062917	A	1	1	0.00227084		0	0	0	S	1	1	0.0067954		0	0	0		0	0	0		0	0
4343	MOV10	60.75		0	0	0		0	0	0		0	0	0		0	0	0		0	0	0	S	1	1	0.0292548	R	1	1			0	0	0		0	0	0		0	0	0		0	0	0	A	1	1
89870	TRIM15	22.3333		0	0	0		0	0	0		0	0	0		0	0	0		0	0	0	A	1	1	0.0134928	S	1	1	0.000565124		0	0	0		0	0	0		0	0	0		0	0	0		0	0
80164	PRR36	43		0	0	0		0	0	0		0	0	0		0	0	0		0	0	0	R	1	1	0.0252391		0	0	0	A	0.0284414	1	1		0	0	0		0	0	0	S	1	2	0.175157	A	1	1
55833	UBAP2	28		0	0	0		0	0	0		0	0	0		0	0	0		0	0	0	A	1	1	0.00226824		0	0	0	A	0.00198056	1	1		0	0	0		0	0	0	S	3	3	0.0251208	S	3	3
6206	RPS12	7		0	0	0		0	0	0		0	0	0		0	0	0		0	0	0	A	1	1	0.00161922		0	0	0	A	0.00176085	1	1		0	0	0		0	0	0	S	1	1	0.000377892	S	2	2
201254	CENPX	8.88889		0	0	0		0	0	0		0	0	0		0	0	0		0	0	0	S	1	1	0.00440504		0	0	0		0	0	0	S	1	1	0.00626861	S	1	2	0.0088784	S	1	1	0.00386263	S	1	1
5954	RCN1	16		0	0	0		0	0	0		0	0	0		0	0	0		0	0	0	A	1	1	0.00389036		0	0	0		0	0	0	S	2	2	0.0150825		0	0	0	S	2	2	0.0172452	A	1	1
29072	SETD2	132.667		0	0	0		0	0	0		0	0	0		0	0	0		0	0	0	A	1	1			0	0	0		0	0	0	S	1	1	0.00893344		0	0	0	S	2	2	0.00821022		0	0
375337	TOPAZ1	102		0	0	0		0	0	0		0	0	0		0	0	0		0	0	0	A	1	1	0.00597385		0	0	0		0	0	0	S	1	1	0.0108232		0	0	0		0	0	0		0	0
3720	JARID2	69.5		0	0	0		0	0	0		0	0	0		0	0	0		0	0	0	R	1	1			0	0	0		0	0	0	S	1	2	0.0123313		0	0	0		0	0	0		0	0
9326	ZNHIT3	7.25		0	0	0		0	0	0		0	0	0		0	0	0		0	0	0	A	1	1	0.00101696		0	0	0		0	0	0		0	0	0	S	1	1	0.00300336	S	1	1	0.00501275	S	1	1
8777	MPDZ	98.8889		0	0	0		0	0	0		0	0	0		0	0	0		0	0	0	S	1	1	0.00584413		0	0	0		0	0	0		0	0	0	S	2	3	0.0187462	S	1	1	0.0268565		0	0
65080	MRPL44	21		0	0	0		0	0	0		0	0	0		0	0	0		0	0	0	R	1	1	0.00123203		0	0	0		0	0	0		0	0	0	S	1	1	0.015923	S	1	1	0.0143589		0	0
54069	MIS18A	13.75		0	0	0		0	0	0		0	0	0		0	0	0		0	0	0	A	1	1	0.0140687		0	0	0		0	0	0		0	0	0	S	1	1	0.0138047	S	1	1	0.0227905		0	0
22824	HSPA4L	55.6		0	0	0		0	0	0		0	0	0		0	0	0		0	0	0	A	1	1	0.000480281		0	0	0		0	0	0		0	0	0	S	1	1	0.00455797		0	0	0		0	0
120071	LARGE2	43.2727		0	0	0		0	0	0		0	0	0		0	0	0		0	0	0	A	1	1	0.0107173		0	0	0		0	0	0		0	0	0	S	1	1	0.0166568		0	0	0		0	0
23385	NCSTN	32.4		0	0	0		0	0	0		0	0	0		0	0	0		0	0	0	A	1	1	0.00832372		0	0	0		0	0	0		0	0	0	S	1	3	0.0478788		0	0	0		0	0
4763	NF1	124.667		0	0	0		0	0	0		0	0	0		0	0	0		0	0	0	A	1	1	0.0369686		0	0	0		0	0	0		0	0	0		0	0	0	S	1	1	0.00459401	S	4	4
3240	HP	23.6667		0	0	0		0	0	0		0	0	0		0	0	0		0	0	0	A	1	1	0.00240874		0	0	0		0	0	0		0	0	0		0	0	0	S	1	1	0.00284596		0	0
7554	ZNF8	46		0	0	0		0	0	0		0	0	0		0	0	0		0	0	0	A	1	1	0.00372419		0	0	0		0	0	0		0	0	0		0	0	0		0	0	0	S	1	1
9961	MVP	50.6667		0	0	0		0	0	0		0	0	0		0	0	0		0	0	0	S	1	1	0.00350398		0	0	0		0	0	0		0	0	0		0	0	0		0	0	0		0	0
8831	SYNGAP1	84.5		0	0	0		0	0	0		0	0	0		0	0	0		0	0	0	S	1	1	0.000398592		0	0	0		0	0	0		0	0	0		0	0	0		0	0	0		0	0
2804	GOLGB1	229.533		0	0	0		0	0	0		0	0	0		0	0	0		0	0	0	S	1	2	0.00211198		0	0	0		0	0	0		0	0	0		0	0	0		0	0	0		0	0
6416	MAP2K4	22.6		0	0	0		0	0	0		0	0	0		0	0	0		0	0	0	S	1	1	0.00477376		0	0	0		0	0	0		0	0	0		0	0	0		0	0	0		0	0
79035	NABP2	11		0	0	0		0	0	0		0	0	0		0	0	0		0	0	0	R	1	1	0.000629033		0	0	0	S	0.000533565	1	1	S	1	1	0.000992435	S	1	1	0.00158083	S	2	2	0.0287566	R	3	3
64859	NABP1	9.33333		0	0	0		0	0	0		0	0	0		0	0	0		0	0	0	R	1	1	0.000629033		0	0	0	S	0.000533565	1	1	S	1	1	0.000992435	S	1	1	0.00158083	A	1	1	0		0	0
1434	CSE1L	58.3333		0	0	0		0	0	0		0	0	0	R	1	1	0.00475323		0	0	0		0	0	0	S	1	1	0.00337288	S	0.244645	2	2	S	4	4	0.0482743	S	1	1	0.00536859	S	9	9	0.144788	S	14	18
9704	DHX34	53.5		0	0	0		0	0	0		0	0	0	A	1	1	0.00272377		0	0	0		0	0	0	A	1	1	0.00161139	A	0.00242036	1	1	S	1	1	0.00874334	S	1	1	0.00967955	S	1	1	0.0119759		0	0
9972	NUP153	72		0	0	0		0	0	0		0	0	0	A	1	1	0.000831946		0	0	0		0	0	0	A	1	1	0.000702346	S	0.0206194	5	5	S	3	3	0.0278468		0	0	0	S	22	26	0.69127	S	27	37
22938	SNW1	33.6667		0	0	0		0	0	0		0	0	0	R	1	1	0.00369808		0	0	0		0	0	0	A	1	1	0.00693092	R	0.0114622	2	2	S	1	1	0.00862943		0	0	0	S	1	1	0.0166618	S	8	9
8697	CDC23	36		0	0	0		0	0	0		0	0	0	S	1	1	0.00133497		0	0	0		0	0	0	R	1	1	0.00134664	R	0.00197954	1	1	S	1	1	0.00414382		0	0	0	S	3	3	0.0111023	S	3	3
6138	RPL15	12		0	0	0		0	0	0		0	0	0	S	1	1	0.00176738		0	0	0		0	0	0	R	1	1	0.00224554	S	0.00254334	1	1		0	0	0		0	0	0		0	0	0	S	2	2
473	RERE	57.2		0	0	0		0	0	0		0	0	0	A	1	1	0.00231486		0	0	0		0	0	0	S	1	1	0.00161017	R	0.00246448	1	1		0	0	0		0	0	0		0	0	0		0	0
6888	TALDO1	26		0	0	0		0	0	0		0	0	0	S	1	1	0.00110518		0	0	0		0	0	0	S	1	1	0.00151805	S	0.00108376	1	1		0	0	0		0	0	0		0	0	0		0	0
4036	LRP2	242		0	0	0		0	0	0		0	0	0	R	1	1			0	0	0		0	0	0	S	1	1	0.0276017		0	0	0	S	1	2	0.025889	S	1	2	0.0186982		0	0	0		0	0
1072	CFL1	12		0	0	0		0	0	0		0	0	0	S	1	1	0.00609038		0	0	0		0	0	0	S	1	1	0.0068597		0	0	0	S	5	9	0.192759	S	1	1	0.0193813		0	0	0		0	0
1062	CENPE	176.333		0	0	0		0	0	0		0	0	0	A	1	1	0.00331522		0	0	0		0	0	0	A	1	1	0.00298655		0	0	0	S	1	1	0.00469307	S	1	1	0.0032052		0	0	0		0	0
29998	BICRA	53.5		0	0	0		0	0	0		0	0	0	A	1	1	0.00220221		0	0	0		0	0	0	R	1	1	0.00163203		0	0	0	S	1	1			0	0	0		0	0	0		0	0
3308	HSPA4	58		0	0	0		0	0	0		0	0	0	R	1	1	0.00134531		0	0	0		0	0	0	S	1	1			0	0	0	S	1	1	0.00590639		0	0	0		0	0	0		0	0
203062	TSNARE1	35.5217		0	0	0		0	0	0		0	0	0	R	1	1	0.00179248		0	0	0		0	0	0	A	1	1	0.00295903		0	0	0		0	0	0		0	0	0	S	1	1	0.00363007		0	0
57062	DDX24	52		0	0	0		0	0	0		0	0	0	R	2	2	0.00322717		0	0	0		0	0	0		0	0	0	A	0.00105007	1	1	S	7	8	0.0861162	S	1	1	0.00707548	S	6	9	0.117746	S	13	17
55275	VPS53	43		0	0	0		0	0	0		0	0	0	A	1	1	0.0019505		0	0	0		0	0	0		0	0	0	S	0.0018387	1	1	S	2	2	0.0284336	S	1	1	0.0108375	S	4	5	0.0708878	S	8	14
8241	RBM10	50.3889		0	0	0		0	0	0		0	0	0	R	1	1	0.00296334		0	0	0		0	0	0		0	0	0	S	0.00594286	2	2	S	1	1	0.00899316		0	0	0	S	2	2	0.0209971	S	3	3
85456	TNKS1BP1	96		0	0	0		0	0	0		0	0	0	S	3	3	0.0113802		0	0	0		0	0	0		0	0	0	S	0.0445466	5	5	S	4	4	0.0113449		0	0	0	S	23	28	0.545614	S	34	40
25920	NELFB	40		0	0	0		0	0	0		0	0	0	S	1	1	0.00189519		0	0	0		0	0	0		0	0	0	S	0.00381826	1	1	S	4	4	0.0214429		0	0	0	S	13	15	0.311431	S	18	21
3070	HELLS	45.6364		0	0	0		0	0	0		0	0	0	S	1	1	0.00239712		0	0	0		0	0	0		0	0	0	S	0.0106933	2	2	S	1	1	0.00938499		0	0	0	S	14	18	0.447685	S	21	34
23350	U2SURP	42.8333		0	0	0		0	0	0		0	0	0	R	1	1	0.00190982		0	0	0		0	0	0		0	0	0	S	0.00518629	2	2		0	0	0	S	1	1	0.00687412	S	1	1	0.0193783	S	5	6
11336	EXOC3	44		0	0	0		0	0	0		0	0	0	S	1	1	0.000912106		0	0	0		0	0	0		0	0	0	S	0.00185562	1	1		0	0	0		0	0	0	S	6	6	0.0644781	S	17	24
55904	KMT2E	79		0	0	0		0	0	0		0	0	0	A	1	1	0.00146069		0	0	0		0	0	0		0	0	0	A	0.0191319	1	1		0	0	0		0	0	0	S	1	1	0.000580715	S	1	1
56521	DNAJC12	9.33333		0	0	0		0	0	0		0	0	0	R	1	1	0.00578428		0	0	0		0	0	0		0	0	0	A	0.00288032	1	1		0	0	0		0	0	0	S	1	1	0.00649935		0	0
1768	DNAH6	232.667		0	0	0		0	0	0		0	0	0	S	1	1	0.00935135		0	0	0		0	0	0		0	0	0	S	0.0100285	1	1		0	0	0		0	0	0		0	0	0		0	0
3993	LLGL2	51.5556		0	0	0		0	0	0		0	0	0	S	1	1	0.0025718		0	0	0		0	0	0		0	0	0	S	0.00326898	1	1		0	0	0		0	0	0		0	0	0		0	0
222584	FAM83B	66		0	0	0		0	0	0		0	0	0	R	1	1	0.000755672		0	0	0		0	0	0		0	0	0	S	0.00260442	1	1		0	0	0		0	0	0		0	0	0		0	0
79915	ATAD5	98.8		0	0	0		0	0	0		0	0	0	S	1	1	0.0025405		0	0	0		0	0	0		0	0	0		0	0	0	S	3	3	0.0166007	S	3	3	0.0124176	S	3	3	0.0211816	S	4	4
7494	XBP1	15		0	0	0		0	0	0		0	0	0	R	1	1	0.000917378		0	0	0		0	0	0		0	0	0		0	0	0	S	5	7	0.280504	S	4	5	0.129869	S	6	8	0.196286	S	4	4
10801	SEPT9	33.375		0	0	0		0	0	0		0	0	0	A	1	1	0.0046356		0	0	0		0	0	0		0	0	0		0	0	0	S	8	9	0.178248	S	4	6	0.0330187	S	18	27	0.858913	S	14	20
84456	L3MBTL3	50.3333		0	0	0		0	0	0		0	0	0	A	1	1	0.00195425		0	0	0		0	0	0		0	0	0		0	0	0	S	1	1	0.0145139	S	3	3	0.0208304	S	1	1	0.0116123		0	0
25806	VAX2	15		0	0	0		0	0	0		0	0	0	A	1	1	0.00197853		0	0	0		0	0	0		0	0	0		0	0	0	S	1	1	0.00921814	S	1	1	0.0071234	S	2	2	0.0175863		0	0
9733	SART3	55.6667		0	0	0		0	0	0		0	0	0	S	1	1	0.00198432		0	0	0		0	0	0		0	0	0		0	0	0	S	1	1	0.00296349	S	1	1	0.00143776	S	2	2	0.0153914	S	3	3
51147	ING4	4.90909		0	0	0		0	0	0		0	0	0	A	1	1	0.00232637		0	0	0		0	0	0		0	0	0		0	0	0	S	2	2	0.00963614	S	1	1	0.002934	S	1	1	0.00302787	R	1	1
11004	KIF2C	46.25		0	0	0		0	0	0		0	0	0	R	1	1	0.00664283		0	0	0		0	0	0		0	0	0		0	0	0	S	1	1	0.0247504	S	1	1	0.0279226	S	1	1	0.0255733	S	2	2
359948	IRF2BP2	34.5		0	0	0		0	0	0		0	0	0	R	1	1	0.00332564		0	0	0		0	0	0		0	0	0		0	0	0	S	2	3	0.0505562	S	2	2	0.0319005	S	4	5	0.120622	S	5	7
23329	TBC1D30	47.75		0	0	0		0	0	0		0	0	0	A	1	1	0.0062543		0	0	0		0	0	0		0	0	0		0	0	0	S	2	2	0.0152781	S	1	1	0.0033004	S	8	9	0.114568	S	5	6
55113	XKR8	21.6667		0	0	0		0	0	0		0	0	0	A	1	1	0.00061222		0	0	0		0	0	0		0	0	0		0	0	0	S	1	1	0.000401283		0	0	0	S	1	1	0.000373321	A	1	1
80728	ARHGAP39	67		0	0	0		0	0	0		0	0	0	S	1	1	0.00231717		0	0	0		0	0	0		0	0	0		0	0	0	S	1	1	0.00438803		0	0	0	S	2	2	0.00905054	S	3	3
6159	RPL29	5.5		0	0	0		0	0	0		0	0	0	A	1	1	0.0013761		0	0	0		0	0	0		0	0	0		0	0	0	S	1	1	0.00290421		0	0	0		0	0	0	S	1	1
20	ABCA2	130		0	0	0		0	0	0		0	0	0	A	1	1	0.876915		0	0	0		0	0	0		0	0	0		0	0	0	S	1	1	0.00340269		0	0	0		0	0	0		0	0
91646	TDRD12	67.75		0	0	0		0	0	0		0	0	0	A	1	1	0.00214086		0	0	0		0	0	0		0	0	0		0	0	0	S	2	2	0.00771203		0	0	0		0	0	0		0	0
5230	PGK1	32		0	0	0		0	0	0		0	0	0	A	1	2	0.0234103		0	0	0		0	0	0		0	0	0		0	0	0	S	1	1	0.0106342	S	1	1	0.00457409		0	0	0		0	0
4323	MMP14	32		0	0	0		0	0	0		0	0	0	A	1	1	0.00438237		0	0	0		0	0	0		0	0	0		0	0	0		0	0	0	S	1	1	0.00371562		0	0	0		0	0
28952	CCDC22	22		0	0	0		0	0	0		0	0	0	R	1	1	0.000930839		0	0	0		0	0	0		0	0	0		0	0	0		0	0	0		0	0	0	S	3	3	0.0272749	S	6	8
79803	HPS6	46		0	0	0		0	0	0		0	0	0	S	1	1	0.00110482		0	0	0		0	0	0		0	0	0		0	0	0		0	0	0		0	0	0	S	3	3	0.0229277	S	2	2
25782	RAB3GAP2	78		0	0	0		0	0	0		0	0	0	R	1	1	0.00175		0	0	0		0	0	0		0	0	0		0	0	0		0	0	0		0	0	0	S	1	1	0.00790723	S	8	10
27335	EIF3K	9.33333		0	0	0		0	0	0		0	0	0	A	1	1	0.00432055		0	0	0		0	0	0		0	0	0		0	0	0		0	0	0		0	0	0	S	1	1	0.0451554	S	2	2
26154	ABCA12	132.333		0	0	0		0	0	0		0	0	0	A	1	1	0.00181276		0	0	0		0	0	0		0	0	0		0	0	0		0	0	0		0	0	0	S	1	1	0.0201501	R	1	1
23067	SETD1B	96		0	0	0		0	0	0		0	0	0	A	1	1	0.00331108		0	0	0		0	0	0		0	0	0		0	0	0		0	0	0		0	0	0	S	3	3	0.0605217	S	3	3
5704	PSMC4	26		0	0	0		0	0	0		0	0	0	A	1	2	0.0131276		0	0	0		0	0	0		0	0	0		0	0	0		0	0	0		0	0	0	S	1	1	0.00646407	S	6	7
129138	ANKRD54	14.25		0	0	0		0	0	0		0	0	0	A	1	1	0.0028786		0	0	0		0	0	0		0	0	0		0	0	0		0	0	0		0	0	0	S	1	1	0.00354914		0	0
25976	TIPARP	31		0	0	0		0	0	0		0	0	0	S	1	1	0.00368526		0	0	0		0	0	0		0	0	0		0	0	0		0	0	0		0	0	0		0	0	0		0	0
83660	TLN2	161		0	0	0		0	0	0		0	0	0	R	1	1			0	0	0		0	0	0		0	0	0		0	0	0		0	0	0		0	0	0		0	0	0	S	2	2
5966	REL	31.25		0	0	0		0	0	0		0	0	0	R	1	1	0.00150566		0	0	0		0	0	0		0	0	0		0	0	0		0	0	0		0	0	0		0	0	0	S	1	1
65065	NBEAL1	136.444		0	0	0		0	0	0		0	0	0	A	1	1	0.00128435		0	0	0		0	0	0		0	0	0		0	0	0		0	0	0		0	0	0		0	0	0	S	1	1
90381	TICRR	99		0	0	0		0	0	0		0	0	0	S	1	1	0.00276884		0	0	0		0	0	0		0	0	0		0	0	0		0	0	0		0	0	0		0	0	0		0	0
2146	EZH2	41.6429		0	0	0		0	0	0		0	0	0	S	1	1	0.00289279		0	0	0		0	0	0		0	0	0		0	0	0		0	0	0		0	0	0		0	0	0		0	0
23244	PDS5A	68		0	0	0		0	0	0		0	0	0	A	1	1	0.00146303		0	0	0		0	0	0		0	0	0	S	0.00749449	2	2	S	2	2	0.0123828	S	1	1	0.00425877	S	11	11	0.197392	S	18	22
55206	SBNO1	79		0	0	0		0	0	0		0	0	0	A	1	1			0	0	0		0	0	0		0	0	0	S	0.00202707	2	2		0	0	0	S	1	1	0.00372352	S	4	5	0.0324665	S	17	21
22904	SBNO2	71		0	0	0		0	0	0		0	0	0	A	1	1			0	0	0		0	0	0		0	0	0	S	0.00202707	2	2		0	0	0		0	0	0	A	2	3	0	A	2	2
6757	SSX2	16		0	0	0		0	0	0		0	0	0	R	1	1	0.00284932		0	0	0		0	0	0		0	0	0		0	0	0		0	0	0		0	0	0	S	1	1	0.0114803		0	0
6758	SSX5	15.5		0	0	0		0	0	0		0	0	0	R	1	1	0.00284932		0	0	0		0	0	0		0	0	0		0	0	0		0	0	0		0	0	0	S	1	1	0.0114803		0	0
6759	SSX4	12.5		0	0	0		0	0	0		0	0	0	R	1	1	0.00284932		0	0	0		0	0	0		0	0	0		0	0	0		0	0	0		0	0	0	S	1	1	0.0114803		0	0
10214	SSX3	16		0	0	0		0	0	0		0	0	0	R	1	1	0.00284932		0	0	0		0	0	0		0	0	0		0	0	0		0	0	0		0	0	0	S	1	1	0.0114803		0	0
548313	SSX4B	12.5		0	0	0		0	0	0		0	0	0	R	1	1	0.00284932		0	0	0		0	0	0		0	0	0		0	0	0		0	0	0		0	0	0	S	1	1	0.0114803		0	0
727837	SSX2B	16		0	0	0		0	0	0		0	0	0	R	1	1	0.00284932		0	0	0		0	0	0		0	0	0		0	0	0		0	0	0		0	0	0	S	1	1	0.0114803		0	0
89790	SIGLEC10	35.5556		0	0	0		0	0	0		0	0	0	S	1	1	0.000920849		0	0	0		0	0	0		0	0	0		0	0	0		0	0	0		0	0	0		0	0	0		0	0
114132	SIGLEC11	32		0	0	0		0	0	0		0	0	0	S	1	1	0.000920849		0	0	0		0	0	0		0	0	0		0	0	0		0	0	0		0	0	0		0	0	0		0	0
400709	SIGLEC16	35		0	0	0		0	0	0		0	0	0	S	1	1	0.000920849		0	0	0		0	0	0		0	0	0		0	0	0		0	0	0		0	0	0		0	0	0		0	0
51332	SPTBN5	212.143		0	0	0		0	0	0		0	0	0		0	0	0		0	0	0		0	0	0	A	1	1	0.00280482	A	0.00529031	1	1	S	1	1	0.0107506	S	1	1	0.00846429		0	0	0		0	0
6780	STAU1	35		0	0	0		0	0	0		0	0	0		0	0	0		0	0	0		0	0	0	R	1	1	0.00376723	R	0.00328479	1	1	S	1	1	0.00412816		0	0	0	S	4	4	0.0527164	S	6	7
79026	AHNAK	93.3333		0	0	0		0	0	0		0	0	0		0	0	0		0	0	0		0	0	0	A	1	1	0.0317583	A	0.00324357	1	1	S	16	19	0.222836		0	0	0	S	50	61	2.00124	S	57	77
6396	SEC13	12.7778		0	0	0		0	0	0		0	0	0		0	0	0		0	0	0		0	0	0	S	1	1	0.00238497	S	0.00251548	1	1	S	1	1	0.00900909		0	0	0	S	2	2	0.0542134	S	2	7
123720	WHAMM	36.4		0	0	0		0	0	0		0	0	0		0	0	0		0	0	0		0	0	0	A	1	1	0.00071589	A	0.000441785	1	1	S	1	1	0.00197927		0	0	0		0	0	0		0	0
55631	LRRC40	30		0	0	0		0	0	0		0	0	0		0	0	0		0	0	0		0	0	0	R	1	1	0.000884766	S	0.00357689	1	1		0	0	0		0	0	0	S	5	5	0.0773583	S	19	28
7158	TP53BP1	96.8333		0	0	0		0	0	0		0	0	0		0	0	0		0	0	0		0	0	0	S	1	1	0.00285893	A	0.0052301	1	1		0	0	0		0	0	0		0	0	0		0	0
7511	XPNPEP1	38.5455		0	0	0		0	0	0		0	0	0		0	0	0		0	0	0		0	0	0	S	1	1	0.00499412	R	0.00782866	1	1		0	0	0		0	0	0		0	0	0		0	0
604	BCL6	47.5		0	0	0		0	0	0		0	0	0		0	0	0		0	0	0		0	0	0	S	2	2	0.004665		0	0	0	S	3	4	0.04257	S	3	4	0.0315903	S	2	3	0.0439648	S	3	4
6142	RPL18A	13		0	0	0		0	0	0		0	0	0		0	0	0		0	0	0		0	0	0	A	1	1	0.00120217		0	0	0	S	3	3	0.0234116	S	2	2	0.0185883	S	4	4	0.0290413	S	3	5
3164	NR4A1	28		0	0	0		0	0	0		0	0	0		0	0	0		0	0	0		0	0	0	R	1	1	0.0058402		0	0	0	S	2	2	0.0355452	S	1	1	0.0126853	S	1	1	0.0103458	R	3	3
55973	BCAP29	19.125		0	0	0		0	0	0		0	0	0		0	0	0		0	0	0		0	0	0	A	1	1	0.00494645		0	0	0	S	1	1	0.00568437	S	1	1	0.00693547		0	0	0		0	0
26007	TKFC	33.9		0	0	0		0	0	0		0	0	0		0	0	0		0	0	0		0	0	0	A	1	1	0.0385494		0	0	0	S	1	1	0.0764632		0	0	0	S	1	1	0.00451959	R	1	1
79707	NOL9	24.5		0	0	0		0	0	0		0	0	0		0	0	0		0	0	0		0	0	0	A	1	1	0.00352769		0	0	0	S	1	1	0.0122851		0	0	0	S	2	2	0.0508392	S	4	4
7267	TTC3	121.154		0	0	0		0	0	0		0	0	0		0	0	0		0	0	0		0	0	0	A	1	1	0.00520127		0	0	0	S	1	1	0.0432806		0	0	0		0	0	0		0	0
23092	ARHGAP26	50		0	0	0		0	0	0		0	0	0		0	0	0		0	0	0		0	0	0	A	1	1	0.00243686		0	0	0	S	1	1	0.00347421	S	1	1	0.0035289	S	1	1	0.00458739	A	1	1
23063	WAPL	72.1667		0	0	0		0	0	0		0	0	0		0	0	0		0	0	0		0	0	0	A	1	1	0.0120758		0	0	0		0	0	0	S	1	1	0.00248009	S	3	3	0.0622111	S	7	8
22879	MON1B	29.3333		0	0	0		0	0	0		0	0	0		0	0	0		0	0	0		0	0	0	A	1	1	0.000114739		0	0	0		0	0	0	S	1	2	0.0143075	S	2	2	0.0233133	S	11	16
22823	MTF2	29.8333		0	0	0		0	0	0		0	0	0		0	0	0		0	0	0		0	0	0	A	2	2	0.0049979		0	0	0		0	0	0	S	1	1	0.00162797	S	1	1	0.00184314		0	0
23291	FBXW11	36		0	0	0		0	0	0		0	0	0		0	0	0		0	0	0		0	0	0	A	1	1	0.00349905		0	0	0		0	0	0	S	1	1			0	0	0		0	0
57691	KIAA1586	38.75		0	0	0		0	0	0		0	0	0		0	0	0		0	0	0		0	0	0	R	1	1	0.00207279		0	0	0		0	0	0		0	0	0	S	1	1	0.0247668		0	0
283638	CEP170B	86.25		0	0	0		0	0	0		0	0	0		0	0	0		0	0	0		0	0	0	A	1	1	0.00150135		0	0	0		0	0	0		0	0	0	S	3	3	0.0293825	S	7	7
51606	ATP6V1H	23.6667		0	0	0		0	0	0		0	0	0		0	0	0		0	0	0		0	0	0	S	1	1	0.00829259		0	0	0		0	0	0		0	0	0	S	1	1	0.0134692	S	9	10
23080	AVL9	35.25		0	0	0		0	0	0		0	0	0		0	0	0		0	0	0		0	0	0	A	1	1	0.0016868		0	0	0		0	0	0		0	0	0	S	2	2	0.0154865	S	8	8
6643	SNX2	30.5		0	0	0		0	0	0		0	0	0		0	0	0		0	0	0		0	0	0	A	1	1	0.00176008		0	0	0		0	0	0		0	0	0	S	1	1	0.00507692	S	4	4
8888	MCM3AP	96		0	0	0		0	0	0		0	0	0		0	0	0		0	0	0		0	0	0	A	1	1			0	0	0		0	0	0		0	0	0	S	1	1	0.00593656		0	0
23759	PPIL2	28.3		0	0	0		0	0	0		0	0	0		0	0	0		0	0	0		0	0	0	R	1	1	0.00101775		0	0	0		0	0	0		0	0	0		0	0	0	S	8	9
57169	ZNFX1	109		0	0	0		0	0	0		0	0	0		0	0	0		0	0	0		0	0	0	R	1	1	0.00404534		0	0	0		0	0	0		0	0	0		0	0	0	S	1	1
4791	NFKB2	47.5714		0	0	0		0	0	0		0	0	0		0	0	0		0	0	0		0	0	0	A	1	1	0.00534002		0	0	0		0	0	0		0	0	0		0	0	0	S	1	1
9774	BCLAF1	22.1111		0	0	0		0	0	0		0	0	0		0	0	0		0	0	0		0	0	0	A	1	1	0.000565707		0	0	0		0	0	0		0	0	0		0	0	0	S	1	1
1952	CELSR2	157		0	0	0		0	0	0		0	0	0		0	0	0		0	0	0		0	0	0	S	1	1	0.052749		0	0	0		0	0	0		0	0	0		0	0	0		0	0
4669	NAGLU	33.75		0	0	0		0	0	0		0	0	0		0	0	0		0	0	0		0	0	0	S	1	1	0.00401594		0	0	0		0	0	0		0	0	0		0	0	0		0	0
8733	GPAA1	28		0	0	0		0	0	0		0	0	0		0	0	0		0	0	0		0	0	0	S	1	1	0.00948499		0	0	0		0	0	0		0	0	0		0	0	0		0	0
23023	TMCC1	27		0	0	0		0	0	0		0	0	0		0	0	0		0	0	0		0	0	0	S	1	1	0.00401594		0	0	0		0	0	0		0	0	0		0	0	0		0	0
94235	GNG8	7		0	0	0		0	0	0		0	0	0		0	0	0		0	0	0		0	0	0	S	1	2			0	0	0		0	0	0		0	0	0		0	0	0		0	0
347517	RAB41	17.3333		0	0	0		0	0	0		0	0	0		0	0	0		0	0	0		0	0	0	S	1	1	0.00270841		0	0	0		0	0	0		0	0	0		0	0	0		0	0
120400	NXPE1	31		0	0	0		0	0	0		0	0	0		0	0	0		0	0	0		0	0	0	A	1	1	0.000810144		0	0	0		0	0	0		0	0	0		0	0	0	S	1	1
55695	NSUN5	26.2		0	0	0		0	0	0		0	0	0		0	0	0		0	0	0		0	0	0		0	0	0	S	0.00293927	2	2	S	3	3	0.017918	S	2	2	0.0177566	S	3	3	0.0391639	S	10	13
2074	ERCC6	66		0	0	0		0	0	0		0	0	0		0	0	0		0	0	0		0	0	0		0	0	0	R	0.00108286	1	1	S	5	8	0.120727	S	7	12	0.139123	S	7	11	0.190458	S	6	8
5901	RAN	10.5		0	0	0		0	0	0		0	0	0		0	0	0		0	0	0		0	0	0		0	0	0	A	0.00364118	1	1	S	8	9	0.1629	S	5	5	0.0565023	S	6	7	0.123161	S	8	13
85461	TANC1	108.778		0	0	0		0	0	0		0	0	0		0	0	0		0	0	0		0	0	0		0	0	0	S	0.00437088	1	1	S	3	3	0.031644	S	1	1	0.00533359	S	10	10	0.142351	S	10	11
283149	BCL9L	70		0	0	0		0	0	0		0	0	0		0	0	0		0	0	0		0	0	0		0	0	0	A	0.00325359	1	1	S	2	2	0.0146974	S	1	1	0.00479294	S	2	2	0.0141028	S	1	1
6263	RYR3	261.467		0	0	0		0	0	0		0	0	0		0	0	0		0	0	0		0	0	0		0	0	0	A	0.127006	3	1	S	1	1	0.450367	S	1	3	2.06625		0	0	0		0	0
25904	CNOT10	47.0909		0	0	0		0	0	0		0	0	0		0	0	0		0	0	0		0	0	0		0	0	0	S	0.0181343	2	2	S	3	3	0.0270969		0	0	0	S	9	10	0.260997	S	7	9
57662	CAMSAP3	74		0	0	0		0	0	0		0	0	0		0	0	0		0	0	0		0	0	0		0	0	0	S	0.00679465	1	1	S	1	1	0.00290313		0	0	0	S	6	7	0.100295	S	14	15
1314	COPA	79		0	0	0		0	0	0		0	0	0		0	0	0		0	0	0		0	0	0		0	0	0	S	0.00298032	1	1	S	3	3	0.0229928		0	0	0	S	16	17	0.242351	S	37	54
22985	ACIN1	67.2		0	0	0		0	0	0		0	0	0		0	0	0		0	0	0		0	0	0		0	0	0	A	0.00241656	1	1	S	1	1	0.00771452		0	0	0	S	2	2	0.0237636	S	4	4
5605	MAP2K2	24.6		0	0	0		0	0	0		0	0	0		0	0	0		0	0	0		0	0	0		0	0	0	S	0.0016007	1	1	S	2	2	0.00678682		0	0	0	S	8	9	0.256748	S	16	22
2580	GAK	73.4706		0	0	0		0	0	0		0	0	0		0	0	0		0	0	0		0	0	0		0	0	0	S	0.0120235	3	3	S	5	5	0.0556172		0	0	0	S	22	32	1.26721	S	15	23
10844	TUBGCP2	57		0	0	0		0	0	0		0	0	0		0	0	0		0	0	0		0	0	0		0	0	0	S	0.00347925	1	1	S	1	1	0.00741149		0	0	0	S	6	8	0.105356	S	14	23
23307	FKBP15	65		0	0	0		0	0	0		0	0	0		0	0	0		0	0	0		0	0	0		0	0	0	S	0.015194	2	2	S	1	1	0.0038621		0	0	0	S	9	11	0.190082	S	22	31
23513	SCRIB	95		0	0	0		0	0	0		0	0	0		0	0	0		0	0	0		0	0	0		0	0	0	S	0.00949504	4	4	S	2	2	0.0105696		0	0	0	S	21	28	0.456186	S	20	26
6293	VPS52	37		0	0	0		0	0	0		0	0	0		0	0	0		0	0	0		0	0	0		0	0	0	S	0.0174909	3	3	S	1	1	0.00431231		0	0	0	S	4	6	0.0524297	S	10	12
23122	CLASP2	67.7843		0	0	0		0	0	0		0	0	0		0	0	0		0	0	0		0	0	0		0	0	0	S	0.0143645	3	3	S	1	1	0.00586983		0	0	0	S	9	10	0.147918	S	11	12
400	ARL1	8.5		0	0	0		0	0	0		0	0	0		0	0	0		0	0	0		0	0	0		0	0	0	S	0.00950697	1	1	S	1	1	0.0306184		0	0	0	S	3	3	0.0776701	S	3	4
9793	CKAP5	124.5		0	0	0		0	0	0		0	0	0		0	0	0		0	0	0		0	0	0		0	0	0	R	0.00369311	2	2	S	7	7	0.0468315		0	0	0	S	26	27	0.655836	S	35	44
4849	CNOT3	19.3333		0	0	0		0	0	0		0	0	0		0	0	0		0	0	0		0	0	0		0	0	0	A	0.00703681	1	1	S	4	4	0.0509711		0	0	0	S	9	13	0.577535	S	9	16
7175	TPR	147		0	0	0		0	0	0		0	0	0		0	0	0		0	0	0		0	0	0		0	0	0	A	0.000963825	1	1	S	1	1	0.000803757		0	0	0	S	3	3	0.0210836	S	10	11
[truncated: 1,522 more rows]
[truncated: 17 more columns]
